# Supplementary material
Source: publisher figshare collection journal article supplement (https://acs.figshare.com/ndownloader/files/8171078)
Supplement: Supplementary file 1 [file 8171078]

 
data_masa1019
 
_audit_creation_method            'SHELXL-2014/7'
_shelx_SHELXL_version_number      '2014/7'
_chemical_name_systematic         ?
_chemical_name_common             ?
_chemical_melting_point           ?
_chemical_formula_moiety          'C48 H45 O6 P3 S3'
_chemical_formula_sum
 'C48 H45 O6 P3 S3' 
_chemical_formula_weight          906.93

loop_
 _atom_type_symbol
 _atom_type_description
 _atom_type_scat_dispersion_real
 _atom_type_scat_dispersion_imag
 _atom_type_scat_source
 'C'  'C'   0.0033   0.0016
 'International Tables Vol C Tables 4.2.6.8 and 6.1.1.4'
 'H'  'H'   0.0000   0.0000
 'International Tables Vol C Tables 4.2.6.8 and 6.1.1.4'
 'O'  'O'   0.0106   0.0060
 'International Tables Vol C Tables 4.2.6.8 and 6.1.1.4'
 'P'  'P'   0.1023   0.0942
 'International Tables Vol C Tables 4.2.6.8 and 6.1.1.4'
 'S'  'S'   0.1246   0.1234
 'International Tables Vol C Tables 4.2.6.8 and 6.1.1.4'
 
_space_group_crystal_system       monoclinic
_space_group_IT_number            14
_space_group_name_H-M_alt         'P 21/n'
_space_group_name_Hall            '-P 2yn'
 
_shelx_space_group_comment
;
The symmetry employed for this shelxl refinement is uniquely defined
by the following loop, which should always be used as a source of
symmetry information in preference to the above space-group names.
They are only intended as comments.
;
 
loop_
 _space_group_symop_operation_xyz
 'x, y, z'
 '-x+1/2, y+1/2, -z+1/2'
 '-x, -y, -z'
 'x-1/2, -y-1/2, z-1/2'
 
_cell_length_a                    27.0197(19)
_cell_length_b                    12.4870(9)
_cell_length_c                    28.207(2)
_cell_angle_alpha                 90
_cell_angle_beta                  113.7770(10)
_cell_angle_gamma                 90
_cell_volume                      8709.1(11)
_cell_formula_units_Z             8
_cell_measurement_temperature     100(2)
_cell_measurement_reflns_used     9006
_cell_measurement_theta_min       2.22
_cell_measurement_theta_max       28.42
 
_exptl_crystal_description        block
_exptl_crystal_colour             yellow
_exptl_crystal_density_meas       ?
_exptl_crystal_density_method     ?
_exptl_crystal_density_diffrn     1.383          
_exptl_crystal_F_000              3792
_exptl_transmission_factor_min    ?
_exptl_transmission_factor_max    ?
_exptl_crystal_size_max           0.12
_exptl_crystal_size_mid           0.06
_exptl_crystal_size_min           0.04
_exptl_absorpt_coefficient_mu     0.331
_shelx_estimated_absorpt_T_min    ?
_shelx_estimated_absorpt_T_max    ?
_exptl_absorpt_correction_type    multi-scan
_exptl_absorpt_correction_T_min   0.976
_exptl_absorpt_correction_T_max   0.987
_exptl_absorpt_process_details    'XPREP; Bruker AXS 2008'
_exptl_absorpt_special_details    'SADABS-2008/1 - Bruker AXS 2008'
_diffrn_ambient_temperature       100(2)
_diffrn_radiation_wavelength      0.71073
_diffrn_radiation_type            MoK\a
_diffrn_source                    'Bruker TXS fine-focus rotating anode'
_diffrn_measurement_device_type   'Bruker APEXII CCD area-detector'
_diffrn_measurement_method        '\f and \w'
_diffrn_detector_area_resol_mean  ?
_diffrn_reflns_number             98681
_diffrn_reflns_av_unetI/netI      0.0170
_diffrn_reflns_av_R_equivalents   0.0231
_diffrn_reflns_limit_h_min        -35
_diffrn_reflns_limit_h_max        36
_diffrn_reflns_limit_k_min        -16
_diffrn_reflns_limit_k_max        16
_diffrn_reflns_limit_l_min        -36
_diffrn_reflns_limit_l_max        35
_diffrn_reflns_theta_min          1.351
_diffrn_reflns_theta_max          28.677
_diffrn_reflns_theta_full         25.242
_diffrn_measured_fraction_theta_max   0.929
_diffrn_measured_fraction_theta_full  0.999
_diffrn_reflns_Laue_measured_fraction_max    0.929
_diffrn_reflns_Laue_measured_fraction_full   0.999
_diffrn_reflns_point_group_measured_fraction_max   0.929
_diffrn_reflns_point_group_measured_fraction_full  0.999
_reflns_number_total              20861
_reflns_number_gt                 18293
_reflns_threshold_expression      'I > 2\s(I)'
_reflns_Friedel_coverage          0.000
_reflns_Friedel_fraction_max      .
_reflns_Friedel_fraction_full     .
 
_reflns_special_details
;
 Reflections were merged by SHELXL according to the crystal
 class for the calculation of statistics and refinement.
 
 _reflns_Friedel_fraction is defined as the number of unique
 Friedel pairs measured divided by the number that would be
 possible theoretically, ignoring centric projections and
 systematic absences.
;
 
_computing_data_collection        'Bruker APEX2 (Bruker 2008)'
_computing_cell_refinement        'Bruker SAINT (Bruker 2008)'
_computing_data_reduction         'Bruker SAINT and XPREP (Bruker 2008)'
_computing_structure_solution     'SHELXS-97 (Sheldrick, 2008)'
_computing_structure_refinement 'SHELXL-2014/7 (Sheldrick, 2014)'
_computing_molecular_graphics     'XSHEL (Bruker, 2002)'
_computing_publication_material   'XCIF (Bruker, 2001)'
_refine_special_details           ?
_refine_ls_structure_factor_coef  Fsqd
_refine_ls_matrix_type            full
_refine_ls_weighting_scheme       calc
_refine_ls_weighting_details
'w=1/[\s^2^(Fo^2^)+(0.0621P)^2^+7.1860P] where P=(Fo^2^+2Fc^2^)/3'
_atom_sites_solution_primary      ?
_atom_sites_solution_secondary    ?
_atom_sites_solution_hydrogens    geom
_refine_ls_hydrogen_treatment     constr
_refine_ls_extinction_method      none
_refine_ls_extinction_coef        .
_refine_ls_number_reflns          20861
_refine_ls_number_parameters      1096
_refine_ls_number_restraints      0
_refine_ls_R_factor_all           0.0471
_refine_ls_R_factor_gt            0.0404
_refine_ls_wR_factor_ref          0.1155
_refine_ls_wR_factor_gt           0.1086
_refine_ls_goodness_of_fit_ref    1.057
_refine_ls_restrained_S_all       1.057
_refine_ls_shift/su_max           0.002
_refine_ls_shift/su_mean          0.000
 
loop_
 _atom_site_label
 _atom_site_type_symbol
 _atom_site_fract_x
 _atom_site_fract_y
 _atom_site_fract_z
 _atom_site_U_iso_or_equiv
 _atom_site_adp_type
 _atom_site_occupancy
 _atom_site_site_symmetry_order  
 _atom_site_calc_flag
 _atom_site_refinement_flags_posn
 _atom_site_refinement_flags_adp
 _atom_site_refinement_flags_occupancy
 _atom_site_disorder_assembly
 _atom_site_disorder_group
C1 C 0.35259(6) 0.31512(13) 0.39705(6) 0.0177(3) Uani 1 1 d . . . . .
C2 C 0.29596(7) 0.30916(14) 0.37300(6) 0.0189(3) Uani 1 1 d . . . . .
C3 C 0.26671(6) 0.32501(13) 0.31695(6) 0.0181(3) Uani 1 1 d . . . . .
C4 C 0.29425(6) 0.35431(13) 0.28611(6) 0.0168(3) Uani 1 1 d . . . . .
C5 C 0.34984(6) 0.41773(13) 0.22879(6) 0.0161(3) Uani 1 1 d . . . . .
C6 C 0.38023(6) 0.44585(13) 0.20009(6) 0.0161(3) Uani 1 1 d . . . . .
C7 C 0.43891(6) 0.45050(12) 0.22468(6) 0.0153(3) Uani 1 1 d . . . . .
C8 C 0.46623(6) 0.42803(12) 0.27677(6) 0.0147(3) Uani 1 1 d . . . . .
C9 C 0.52170(6) 0.38446(12) 0.37889(6) 0.0144(3) Uani 1 1 d . . . . .
C10 C 0.54831(6) 0.35822(12) 0.43164(6) 0.0152(3) Uani 1 1 d . . . . .
C11 C 0.51751(6) 0.32821(12) 0.46183(6) 0.0158(3) Uani 1 1 d . . . . .
C12 C 0.46172(6) 0.32333(12) 0.43937(6) 0.0154(3) Uani 1 1 d . . . . .
C13 C 0.37844(6) 0.34168(13) 0.36397(6) 0.0174(3) Uani 1 1 d . . . . .
C14 C 0.35077(6) 0.36224(13) 0.31177(6) 0.0172(3) Uani 1 1 d . . . . .
C15 C 0.37987(6) 0.39321(13) 0.28140(6) 0.0163(3) Uani 1 1 d . . . . .
C16 C 0.43566(6) 0.39938(13) 0.30455(6) 0.0157(3) Uani 1 1 d . . . . .
C17 C 0.46480(6) 0.37685(13) 0.35807(6) 0.0156(3) Uani 1 1 d . . . . .
C18 C 0.43602(6) 0.34787(13) 0.38696(6) 0.0162(3) Uani 1 1 d . . . . .
P1 P 0.40873(2) 0.29664(3) 0.46312(2) 0.01532(8) Uani 1 1 d . . . . .
P2 P 0.27769(2) 0.40023(3) 0.21885(2) 0.01616(9) Uani 1 1 d . . . . .
P3 P 0.53750(2) 0.42829(3) 0.32227(2) 0.01345(8) Uani 1 1 d . . . . .
S1 S 0.41317(2) 0.38939(4) 0.52029(2) 0.02406(10) Uani 1 1 d . . . . .
S2 S 0.23113(2) 0.52617(4) 0.19829(2) 0.02471(10) Uani 1 1 d . . . . .
S3 S 0.58543(2) 0.33911(3) 0.30306(2) 0.01881(9) Uani 1 1 d . . . . .
C19 C 0.41231(7) 0.15600(13) 0.47913(7) 0.0196(3) Uani 1 1 d . . . . .
C20 C 0.42304(9) 0.12789(16) 0.53021(8) 0.0307(4) Uani 1 1 d . . . . .
H1 H 0.4259 0.1807 0.5544 0.037 Uiso 1 1 calc R U . . .
C21 C 0.42944(10) 0.02044(18) 0.54486(10) 0.0442(6) Uani 1 1 d . . . . .
H2 H 0.4360 0.0011 0.5787 0.053 Uiso 1 1 calc R U . . .
C22 C 0.42589(11) -0.05705(18) 0.50861(12) 0.0479(6) Uani 1 1 d . . . . .
H3 H 0.4306 -0.1287 0.5184 0.057 Uiso 1 1 calc R U . . .
C23 C 0.41539(11) -0.02926(18) 0.45814(11) 0.0480(6) Uani 1 1 d . . . . .
H4 H 0.4134 -0.0822 0.4343 0.058 Uiso 1 1 calc R U . . .
C24 C 0.40769(10) 0.07764(16) 0.44265(9) 0.0359(5) Uani 1 1 d . . . . .
H5 H 0.3996 0.0962 0.4084 0.043 Uiso 1 1 calc R U . . .
C25 C 0.25389(6) 0.28463(13) 0.17679(6) 0.0182(3) Uani 1 1 d . . . . .
C26 C 0.27908(7) 0.18587(14) 0.19317(7) 0.0214(3) Uani 1 1 d . . . . .
H6 H 0.3081 0.1797 0.2252 0.026 Uiso 1 1 calc R U . . .
C27 C 0.26065(8) 0.09647(16) 0.16140(8) 0.0283(4) Uani 1 1 d . . . . .
H7 H 0.2769 0.0301 0.1723 0.034 Uiso 1 1 calc R U . . .
C28 C 0.21784(9) 0.10690(17) 0.11326(8) 0.0319(4) Uani 1 1 d . . . . .
H8 H 0.2056 0.0471 0.0921 0.038 Uiso 1 1 calc R U . . .
C29 C 0.19324(8) 0.20526(17) 0.09647(7) 0.0304(4) Uani 1 1 d . . . . .
H9 H 0.1650 0.2115 0.0640 0.037 Uiso 1 1 calc R U . . .
C30 C 0.21092(7) 0.29448(15) 0.12828(7) 0.0232(3) Uani 1 1 d . . . . .
H10 H 0.1943 0.3605 0.1174 0.028 Uiso 1 1 calc R U . . .
C31 C 0.55533(6) 0.56885(12) 0.33002(6) 0.0150(3) Uani 1 1 d . . . . .
C32 C 0.51679(7) 0.64637(14) 0.32577(7) 0.0206(3) Uani 1 1 d . . . . .
H11 H 0.4816 0.6261 0.3197 0.025 Uiso 1 1 calc R U . . .
C33 C 0.53090(7) 0.75434(14) 0.33056(7) 0.0244(4) Uani 1 1 d . . . . .
H12 H 0.5050 0.8062 0.3273 0.029 Uiso 1 1 calc R U . . .
C34 C 0.58345(8) 0.78447(14) 0.34022(7) 0.0244(4) Uani 1 1 d . . . . .
H13 H 0.5930 0.8565 0.3442 0.029 Uiso 1 1 calc R U . . .
C35 C 0.62195(7) 0.70743(15) 0.34402(7) 0.0254(4) Uani 1 1 d . . . . .
H14 H 0.6571 0.7279 0.3501 0.031 Uiso 1 1 calc R U . . .
C36 C 0.60795(7) 0.59982(14) 0.33878(7) 0.0211(3) Uani 1 1 d . . . . .
H15 H 0.6337 0.5483 0.3411 0.025 Uiso 1 1 calc R U . . .
O1 O 0.26209(5) 0.29100(11) 0.39665(5) 0.0248(3) Uani 1 1 d . . . . .
C37 C 0.28285(7) 0.30900(17) 0.45203(7) 0.0266(4) Uani 1 1 d . . . . .
H16 H 0.3095 0.3660 0.4618 0.032 Uiso 1 1 calc R U . . .
H17 H 0.3002 0.2445 0.4704 0.032 Uiso 1 1 calc R U . . .
C38 C 0.23669(8) 0.33916(17) 0.46638(8) 0.0286(4) Uani 1 1 d . . . . .
H18 H 0.2195 0.4026 0.4479 0.043 Uiso 1 1 calc R U . . .
H19 H 0.2503 0.3524 0.5030 0.043 Uiso 1 1 calc R U . . .
H20 H 0.2109 0.2817 0.4574 0.043 Uiso 1 1 calc R U . . .
O2 O 0.21288(5) 0.31114(11) 0.30094(5) 0.0219(2) Uani 1 1 d . . . . .
C39 C 0.18247(7) 0.28633(17) 0.24672(7) 0.0252(4) Uani 1 1 d . . . . .
H21 H 0.1999 0.2286 0.2362 0.030 Uiso 1 1 calc R U . . .
H22 H 0.1809 0.3486 0.2256 0.030 Uiso 1 1 calc R U . . .
C40 C 0.12636(8) 0.2536(2) 0.23952(8) 0.0402(5) Uani 1 1 d . . . . .
H23 H 0.1282 0.1904 0.2595 0.060 Uiso 1 1 calc R U . . .
H24 H 0.1052 0.2390 0.2036 0.060 Uiso 1 1 calc R U . . .
H25 H 0.1098 0.3105 0.2509 0.060 Uiso 1 1 calc R U . . .
O3 O 0.36112(5) 0.47104(10) 0.14910(4) 0.0202(2) Uani 1 1 d . . . . .
C41 C 0.30423(8) 0.4924(2) 0.12222(8) 0.0400(5) Uani 1 1 d . . . . .
H26 H 0.2934 0.5480 0.1401 0.048 Uiso 1 1 calc R U . . .
H27 H 0.2836 0.4283 0.1213 0.048 Uiso 1 1 calc R U . . .
C42 C 0.29336(8) 0.52783(19) 0.06820(7) 0.0342(4) Uani 1 1 d . . . . .
H28 H 0.3128 0.5928 0.0694 0.051 Uiso 1 1 calc R U . . .
H29 H 0.2553 0.5402 0.0495 0.051 Uiso 1 1 calc R U . . .
H30 H 0.3050 0.4732 0.0510 0.051 Uiso 1 1 calc R U . . .
O4 O 0.46659(5) 0.48250(9) 0.19576(4) 0.0172(2) Uani 1 1 d . . . . .
C43 C 0.48509(8) 0.39521(14) 0.17306(7) 0.0243(4) Uani 1 1 d . . . . .
H31 H 0.4557 0.3694 0.1420 0.029 Uiso 1 1 calc R U . . .
H32 H 0.4980 0.3363 0.1974 0.029 Uiso 1 1 calc R U . . .
C44 C 0.53025(11) 0.43838(18) 0.16009(11) 0.0445(6) Uani 1 1 d . . . . .
H33 H 0.5172 0.4978 0.1367 0.067 Uiso 1 1 calc R U . . .
H34 H 0.5429 0.3831 0.1440 0.067 Uiso 1 1 calc R U . . .
H35 H 0.5595 0.4617 0.1913 0.067 Uiso 1 1 calc R U . . .
O5 O 0.60238(4) 0.35586(9) 0.46021(4) 0.0178(2) Uani 1 1 d . . . . .
C45 C 0.63663(7) 0.39491(14) 0.43581(7) 0.0205(3) Uani 1 1 d . . . . .
H36 H 0.6244 0.4650 0.4209 0.025 Uiso 1 1 calc R U . . .
H37 H 0.6350 0.3467 0.4083 0.025 Uiso 1 1 calc R U . . .
C46 C 0.69383(7) 0.40178(17) 0.47621(7) 0.0277(4) Uani 1 1 d . . . . .
H38 H 0.6955 0.4528 0.5023 0.042 Uiso 1 1 calc R U . . .
H39 H 0.7174 0.4241 0.4602 0.042 Uiso 1 1 calc R U . . .
H40 H 0.7050 0.3328 0.4919 0.042 Uiso 1 1 calc R U . . .
O6 O 0.54519(5) 0.30030(9) 0.51282(4) 0.0181(2) Uani 1 1 d . . . . .
C47 C 0.55870(7) 0.38898(14) 0.54921(6) 0.0214(3) Uani 1 1 d . . . . .
H41 H 0.5290 0.4396 0.5391 0.026 Uiso 1 1 calc R U . . .
H42 H 0.5906 0.4260 0.5499 0.026 Uiso 1 1 calc R U . . .
C48 C 0.56933(8) 0.34300(16) 0.60178(7) 0.0276(4) Uani 1 1 d . . . . .
H43 H 0.5369 0.3105 0.6012 0.041 Uiso 1 1 calc R U . . .
H44 H 0.5805 0.3992 0.6272 0.041 Uiso 1 1 calc R U . . .
H45 H 0.5974 0.2900 0.6105 0.041 Uiso 1 1 calc R U . . .
C49 C 0.54249(6) 0.18717(12) 0.06498(6) 0.0154(3) Uani 1 1 d . . . . .
C50 C 0.48709(6) 0.17646(12) 0.03924(6) 0.0156(3) Uani 1 1 d . . . . .
C51 C 0.45346(6) 0.14581(12) 0.06684(6) 0.0155(3) Uani 1 1 d . . . . .
C52 C 0.47710(6) 0.12486(12) 0.12032(6) 0.0154(3) Uani 1 1 d . . . . .
C53 C 0.52725(6) 0.08632(12) 0.22361(6) 0.0158(3) Uani 1 1 d . . . . .
C54 C 0.55229(7) 0.06519(12) 0.27623(6) 0.0167(3) Uani 1 1 d . . . . .
C55 C 0.61018(7) 0.07892(12) 0.30417(6) 0.0168(3) Uani 1 1 d . . . . .
C56 C 0.64267(6) 0.10920(13) 0.27794(6) 0.0164(3) Uani 1 1 d . . . . .
C57 C 0.70357(6) 0.16234(13) 0.22443(6) 0.0166(3) Uani 1 1 d . . . . .
C58 C 0.73361(6) 0.18785(13) 0.19550(6) 0.0172(3) Uani 1 1 d . . . . .
C59 C 0.70661(6) 0.21198(13) 0.14007(6) 0.0168(3) Uani 1 1 d . . . . .
C60 C 0.65051(6) 0.20865(12) 0.11414(6) 0.0154(3) Uani 1 1 d . . . . .
C61 C 0.56485(6) 0.16930(13) 0.11825(6) 0.0160(3) Uani 1 1 d . . . . .
C62 C 0.53355(6) 0.13892(13) 0.14442(6) 0.0158(3) Uani 1 1 d . . . . .
C63 C 0.55996(6) 0.11982(13) 0.19874(6) 0.0164(3) Uani 1 1 d . . . . .
C64 C 0.61529(6) 0.13026(13) 0.22477(6) 0.0165(3) Uani 1 1 d . . . . .
C65 C 0.64717(6) 0.15981(13) 0.19683(6) 0.0166(3) Uani 1 1 d . . . . .
C66 C 0.62202(6) 0.18038(13) 0.14463(6) 0.0161(3) Uani 1 1 d . . . . .
P4 P 0.59890(2) 0.21673(3) 0.04601(2) 0.01415(8) Uani 1 1 d . . . . .
P5 P 0.45749(2) 0.08010(3) 0.17441(2) 0.01475(8) Uani 1 1 d . . . . .
P6 P 0.71574(2) 0.11956(3) 0.29134(2) 0.01718(9) Uani 1 1 d . . . . .
S4 S 0.60910(2) 0.11762(3) -0.00248(2) 0.02059(9) Uani 1 1 d . . . . .
S5 S 0.40422(2) 0.16473(3) 0.18792(2) 0.02041(9) Uani 1 1 d . . . . .
S6 S 0.75528(2) -0.01379(4) 0.31518(2) 0.02948(11) Uani 1 1 d . . . . .
C67 C 0.59088(6) 0.35489(13) 0.02482(6) 0.0181(3) Uani 1 1 d . . . . .
C68 C 0.58655(9) 0.43608(15) 0.05678(8) 0.0298(4) Uani 1 1 d . . . . .
H46 H 0.5875 0.4197 0.0893 0.036 Uiso 1 1 calc R U . . .
C69 C 0.58080(10) 0.54172(16) 0.03981(10) 0.0379(5) Uani 1 1 d . . . . .
H47 H 0.5769 0.5960 0.0606 0.046 Uiso 1 1 calc R U . . .
C70 C 0.58079(9) 0.56604(17) -0.00806(10) 0.0390(5) Uani 1 1 d . . . . .
H48 H 0.5777 0.6369 -0.0190 0.047 Uiso 1 1 calc R U . . .
C71 C 0.58538(10) 0.48567(17) -0.03982(9) 0.0378(5) Uani 1 1 d . . . . .
H49 H 0.5853 0.5025 -0.0720 0.045 Uiso 1 1 calc R U . . .
C72 C 0.59018(8) 0.37926(15) -0.02347(7) 0.0268(4) Uani 1 1 d . . . . .
H50 H 0.5929 0.3249 -0.0448 0.032 Uiso 1 1 calc R U . . .
C73 C 0.44245(6) -0.06148(13) 0.16572(6) 0.0167(3) Uani 1 1 d . . . . .
C74 C 0.38924(7) -0.09704(14) 0.15151(7) 0.0200(3) Uani 1 1 d . . . . .
H51 H 0.3617 -0.0479 0.1462 0.024 Uiso 1 1 calc R U . . .
C75 C 0.37771(7) -0.20591(14) 0.14529(7) 0.0222(3) Uani 1 1 d . . . . .
H52 H 0.3423 -0.2296 0.1354 0.027 Uiso 1 1 calc R U . . .
C76 C 0.41925(7) -0.27951(14) 0.15389(7) 0.0221(3) Uani 1 1 d . . . . .
H53 H 0.4115 -0.3523 0.1494 0.027 Uiso 1 1 calc R U . . .
C77 C 0.47188(7) -0.24463(15) 0.16905(8) 0.0273(4) Uani 1 1 d . . . . .
H54 H 0.4996 -0.2941 0.1755 0.033 Uiso 1 1 calc R U . . .
C78 C 0.48370(7) -0.13590(14) 0.17466(8) 0.0244(4) Uani 1 1 d . . . . .
H55 H 0.5192 -0.1127 0.1844 0.029 Uiso 1 1 calc R U . . .
C79 C 0.74369(7) 0.23565(14) 0.33213(6) 0.0201(3) Uani 1 1 d . . . . .
C80 C 0.78764(7) 0.22458(17) 0.37965(7) 0.0272(4) Uani 1 1 d . . . . .
H56 H 0.8026 0.1573 0.3908 0.033 Uiso 1 1 calc R U . . .
C81 C 0.80903(8) 0.3142(2) 0.41025(8) 0.0352(5) Uani 1 1 d . . . . .
H57 H 0.8383 0.3069 0.4420 0.042 Uiso 1 1 calc R U . . .
C82 C 0.78684(9) 0.41451(19) 0.39356(8) 0.0367(5) Uani 1 1 d . . . . .
H58 H 0.8013 0.4743 0.4142 0.044 Uiso 1 1 calc R U . . .
C83 C 0.74296(8) 0.42622(16) 0.34604(8) 0.0307(4) Uani 1 1 d . . . . .
H59 H 0.7282 0.4936 0.3350 0.037 Uiso 1 1 calc R U . . .
C84 C 0.72136(7) 0.33689(15) 0.31518(7) 0.0231(3) Uani 1 1 d . . . . .
H60 H 0.6922 0.3444 0.2834 0.028 Uiso 1 1 calc R U . . .
O7 O 0.46216(5) 0.19894(9) -0.01258(4) 0.0183(2) Uani 1 1 d . . . . .
C85 C 0.45347(8) 0.10614(14) -0.04597(7) 0.0232(3) Uani 1 1 d . . . . .
H61 H 0.4265 0.0593 -0.0424 0.028 Uiso 1 1 calc R U . . .
H62 H 0.4869 0.0662 -0.0367 0.028 Uiso 1 1 calc R U . . .
C86 C 0.43443(8) 0.14637(17) -0.10060(7) 0.0301(4) Uani 1 1 d . . . . .
H63 H 0.4027 0.1896 -0.1086 0.045 Uiso 1 1 calc R U . . .
H64 H 0.4260 0.0867 -0.1240 0.045 Uiso 1 1 calc R U . . .
H65 H 0.4624 0.1886 -0.1042 0.045 Uiso 1 1 calc R U . . .
O8 O 0.40073(5) 0.14095(10) 0.03386(5) 0.0199(2) Uani 1 1 d . . . . .
C87 C 0.35842(7) 0.12367(14) 0.05162(7) 0.0217(3) Uani 1 1 d . . . . .
H66 H 0.3730 0.0873 0.0848 0.026 Uiso 1 1 calc R U . . .
H67 H 0.3307 0.0784 0.0272 0.026 Uiso 1 1 calc R U . . .
C88 C 0.33379(8) 0.22938(17) 0.05703(8) 0.0320(4) Uani 1 1 d . . . . .
H68 H 0.3611 0.2735 0.0818 0.048 Uiso 1 1 calc R U . . .
H69 H 0.3055 0.2166 0.0687 0.048 Uiso 1 1 calc R U . . .
H70 H 0.3191 0.2650 0.0241 0.048 Uiso 1 1 calc R U . . .
O9 O 0.52279(5) 0.02961(9) 0.30297(5) 0.0194(2) Uani 1 1 d . . . . .
C89 C 0.49873(8) 0.11484(15) 0.32183(7) 0.0256(4) Uani 1 1 d . . . . .
H71 H 0.4868 0.1727 0.2968 0.031 Uiso 1 1 calc R U . . .
H72 H 0.5250 0.1430 0.3543 0.031 Uiso 1 1 calc R U . . .
C90 C 0.45115(10) 0.06740(19) 0.32970(10) 0.0416(5) Uani 1 1 d . . . . .
H73 H 0.4265 0.0360 0.2979 0.062 Uiso 1 1 calc R U . . .
H74 H 0.4330 0.1227 0.3402 0.062 Uiso 1 1 calc R U . . .
H75 H 0.4637 0.0133 0.3561 0.062 Uiso 1 1 calc R U . . .
O10 O 0.62716(5) 0.06102(10) 0.35569(4) 0.0209(2) Uani 1 1 d . . . . .
C91 C 0.67605(7) 0.11488(14) 0.38910(6) 0.0217(3) Uani 1 1 d . . . . .
H76 H 0.6759 0.1883 0.3778 0.026 Uiso 1 1 calc R U . . .
H77 H 0.7074 0.0789 0.3880 0.026 Uiso 1 1 calc R U . . .
C92 C 0.67833(8) 0.11249(16) 0.44358(7) 0.0285(4) Uani 1 1 d . . . . .
H78 H 0.6495 0.1552 0.4451 0.043 Uiso 1 1 calc R U . . .
H79 H 0.7124 0.1407 0.4672 0.043 Uiso 1 1 calc R U . . .
H80 H 0.6746 0.0400 0.4530 0.043 Uiso 1 1 calc R U . . .
O11 O 0.78796(5) 0.19150(11) 0.21249(5) 0.0229(3) Uani 1 1 d . . . . .
C93 C 0.81934(8) 0.2061(2) 0.26684(7) 0.0372(5) Uani 1 1 d . . . . .
H81 H 0.8144 0.1458 0.2861 0.045 Uiso 1 1 calc R U . . .
H82 H 0.8080 0.2707 0.2788 0.045 Uiso 1 1 calc R U . . .
C94 C 0.87733(9) 0.2148(4) 0.27489(10) 0.0751(12) Uani 1 1 d . . . . .
H83 H 0.8868 0.1547 0.2590 0.113 Uiso 1 1 calc R U . . .
H84 H 0.8997 0.2154 0.3113 0.113 Uiso 1 1 calc R U . . .
H85 H 0.8827 0.2799 0.2595 0.113 Uiso 1 1 calc R U . . .
O12 O 0.74177(5) 0.23673(10) 0.11859(5) 0.0199(2) Uani 1 1 d . . . . .
C95 C 0.72209(7) 0.30772(14) 0.07427(6) 0.0216(3) Uani 1 1 d . . . . .
H86 H 0.7011 0.3653 0.0800 0.026 Uiso 1 1 calc R U . . .
H87 H 0.6992 0.2687 0.0435 0.026 Uiso 1 1 calc R U . . .
C96 C 0.77080(8) 0.35241(17) 0.06754(7) 0.0298(4) Uani 1 1 d . . . . .
H88 H 0.7938 0.3884 0.0987 0.045 Uiso 1 1 calc R U . . .
H89 H 0.7591 0.4022 0.0392 0.045 Uiso 1 1 calc R U . . .
H90 H 0.7904 0.2950 0.0604 0.045 Uiso 1 1 calc R U . . .
 
loop_
 _atom_site_aniso_label
 _atom_site_aniso_U_11
 _atom_site_aniso_U_22
 _atom_site_aniso_U_33
 _atom_site_aniso_U_23
 _atom_site_aniso_U_13
 _atom_site_aniso_U_12
C1 0.0168(7) 0.0219(8) 0.0160(7) 0.0031(6) 0.0082(6) 0.0000(6)
C2 0.0176(7) 0.0235(8) 0.0193(8) 0.0011(6) 0.0113(6) -0.0014(6)
C3 0.0146(7) 0.0211(8) 0.0194(8) -0.0010(6) 0.0078(6) -0.0018(6)
C4 0.0154(7) 0.0193(8) 0.0160(7) 0.0001(6) 0.0068(6) -0.0012(6)
C5 0.0149(7) 0.0178(7) 0.0150(7) 0.0001(6) 0.0055(6) -0.0024(6)
C6 0.0197(7) 0.0144(7) 0.0145(7) 0.0009(5) 0.0073(6) -0.0019(6)
C7 0.0189(7) 0.0120(7) 0.0184(7) -0.0006(5) 0.0112(6) -0.0026(6)
C8 0.0151(7) 0.0138(7) 0.0168(7) -0.0011(5) 0.0082(6) -0.0022(5)
C9 0.0159(7) 0.0130(7) 0.0165(7) -0.0006(5) 0.0089(6) -0.0010(5)
C10 0.0153(7) 0.0124(7) 0.0179(7) -0.0017(5) 0.0066(6) 0.0006(5)
C11 0.0198(7) 0.0133(7) 0.0149(7) 0.0011(5) 0.0077(6) 0.0011(6)
C12 0.0187(7) 0.0142(7) 0.0160(7) 0.0012(6) 0.0096(6) -0.0003(6)
C13 0.0150(7) 0.0214(8) 0.0176(7) 0.0025(6) 0.0084(6) -0.0010(6)
C14 0.0150(7) 0.0211(8) 0.0168(7) 0.0019(6) 0.0079(6) -0.0013(6)
C15 0.0153(7) 0.0193(8) 0.0152(7) 0.0013(6) 0.0072(6) -0.0025(6)
C16 0.0153(7) 0.0176(7) 0.0155(7) 0.0004(6) 0.0076(6) -0.0019(6)
C17 0.0154(7) 0.0173(7) 0.0158(7) 0.0007(6) 0.0079(6) -0.0006(6)
C18 0.0154(7) 0.0187(8) 0.0154(7) 0.0015(6) 0.0072(6) -0.0004(6)
P1 0.01733(19) 0.01585(19) 0.01543(18) 0.00177(14) 0.00937(15) 0.00047(14)
P2 0.01432(18) 0.0189(2) 0.01481(18) 0.00105(15) 0.00546(15) -0.00086(15)
P3 0.01328(17) 0.01323(18) 0.01576(18) -0.00047(14) 0.00785(15) -0.00091(13)
S1 0.0313(2) 0.0215(2) 0.0250(2) -0.00462(16) 0.01728(18) -0.00059(17)
S2 0.0257(2) 0.0235(2) 0.0245(2) 0.00331(16) 0.00971(17) 0.00633(17)
S3 0.02008(19) 0.01747(19) 0.02283(19) -0.00204(15) 0.01275(16) 0.00227(14)
C19 0.0195(8) 0.0165(8) 0.0260(8) 0.0018(6) 0.0125(7) -0.0005(6)
C20 0.0395(11) 0.0229(9) 0.0271(9) 0.0061(7) 0.0109(8) -0.0012(8)
C21 0.0535(14) 0.0306(11) 0.0456(13) 0.0182(10) 0.0168(11) 0.0036(10)
C22 0.0538(14) 0.0207(10) 0.0818(19) 0.0139(11) 0.0406(14) 0.0082(9)
C23 0.0669(16) 0.0208(10) 0.0804(18) -0.0135(11) 0.0547(15) -0.0065(10)
C24 0.0568(13) 0.0245(10) 0.0431(12) -0.0079(8) 0.0374(11) -0.0074(9)
C25 0.0166(7) 0.0217(8) 0.0185(7) -0.0019(6) 0.0095(6) -0.0046(6)
C26 0.0201(8) 0.0242(8) 0.0224(8) 0.0003(7) 0.0112(7) -0.0027(6)
C27 0.0337(10) 0.0236(9) 0.0355(10) -0.0035(7) 0.0223(8) -0.0048(7)
C28 0.0376(11) 0.0323(10) 0.0305(10) -0.0121(8) 0.0187(9) -0.0143(8)
C29 0.0281(9) 0.0401(11) 0.0223(9) -0.0074(8) 0.0094(7) -0.0122(8)
C30 0.0188(8) 0.0295(9) 0.0207(8) 0.0005(7) 0.0072(7) -0.0039(7)
C31 0.0165(7) 0.0146(7) 0.0159(7) -0.0010(5) 0.0086(6) -0.0019(6)
C32 0.0163(7) 0.0187(8) 0.0287(9) -0.0025(6) 0.0112(7) -0.0013(6)
C33 0.0243(8) 0.0170(8) 0.0322(9) -0.0016(7) 0.0117(7) 0.0025(6)
C34 0.0298(9) 0.0157(8) 0.0300(9) -0.0019(7) 0.0146(7) -0.0051(7)
C35 0.0212(8) 0.0240(9) 0.0352(10) -0.0035(7) 0.0158(7) -0.0078(7)
C36 0.0163(7) 0.0201(8) 0.0294(9) -0.0023(7) 0.0118(7) -0.0009(6)
O1 0.0189(6) 0.0394(8) 0.0203(6) 0.0003(5) 0.0121(5) -0.0060(5)
C37 0.0242(8) 0.0366(10) 0.0217(8) 0.0021(7) 0.0119(7) 0.0005(7)
C38 0.0270(9) 0.0351(10) 0.0283(9) -0.0014(8) 0.0159(8) -0.0011(8)
O2 0.0133(5) 0.0343(7) 0.0194(6) -0.0033(5) 0.0079(5) -0.0042(5)
C39 0.0176(8) 0.0390(10) 0.0187(8) -0.0040(7) 0.0068(6) -0.0063(7)
C40 0.0209(9) 0.0740(17) 0.0263(10) -0.0133(10) 0.0101(8) -0.0168(10)
O3 0.0208(6) 0.0250(6) 0.0144(5) 0.0034(4) 0.0066(4) -0.0017(5)
C41 0.0223(9) 0.0719(16) 0.0235(9) 0.0142(10) 0.0068(8) -0.0029(10)
C42 0.0326(10) 0.0456(12) 0.0207(9) 0.0078(8) 0.0069(8) -0.0008(9)
O4 0.0227(6) 0.0148(5) 0.0200(5) 0.0016(4) 0.0146(5) -0.0016(4)
C43 0.0370(10) 0.0195(8) 0.0259(9) -0.0014(7) 0.0226(8) 0.0003(7)
C44 0.0625(15) 0.0303(11) 0.0702(16) 0.0031(10) 0.0574(14) 0.0026(10)
O5 0.0141(5) 0.0204(6) 0.0185(5) 0.0014(4) 0.0059(4) 0.0009(4)
C45 0.0160(7) 0.0265(9) 0.0203(8) -0.0007(6) 0.0088(6) -0.0002(6)
C46 0.0175(8) 0.0392(11) 0.0253(9) -0.0007(8) 0.0073(7) -0.0016(7)
O6 0.0214(6) 0.0163(5) 0.0144(5) 0.0018(4) 0.0049(4) 0.0021(4)
C47 0.0257(8) 0.0201(8) 0.0164(7) -0.0013(6) 0.0063(6) 0.0010(6)
C48 0.0321(9) 0.0323(10) 0.0184(8) 0.0020(7) 0.0102(7) 0.0043(8)
C49 0.0179(7) 0.0139(7) 0.0173(7) 0.0009(6) 0.0103(6) 0.0011(6)
C50 0.0183(7) 0.0126(7) 0.0175(7) 0.0007(6) 0.0089(6) 0.0012(6)
C51 0.0154(7) 0.0126(7) 0.0199(7) -0.0014(6) 0.0088(6) -0.0003(5)
C52 0.0164(7) 0.0136(7) 0.0193(7) -0.0010(6) 0.0104(6) -0.0009(5)
C53 0.0165(7) 0.0141(7) 0.0198(7) -0.0016(6) 0.0105(6) -0.0026(5)
C54 0.0230(8) 0.0115(7) 0.0216(8) 0.0004(6) 0.0152(6) -0.0017(6)
C55 0.0229(8) 0.0133(7) 0.0157(7) 0.0016(5) 0.0093(6) 0.0000(6)
C56 0.0181(7) 0.0156(7) 0.0170(7) -0.0001(6) 0.0087(6) -0.0009(6)
C57 0.0166(7) 0.0181(7) 0.0153(7) 0.0006(6) 0.0067(6) 0.0000(6)
C58 0.0132(7) 0.0188(8) 0.0202(8) -0.0011(6) 0.0075(6) -0.0008(6)
C59 0.0182(7) 0.0159(7) 0.0204(8) 0.0005(6) 0.0122(6) -0.0009(6)
C60 0.0173(7) 0.0153(7) 0.0161(7) 0.0014(6) 0.0092(6) -0.0003(6)
C61 0.0166(7) 0.0164(7) 0.0174(7) 0.0007(6) 0.0092(6) -0.0009(6)
C62 0.0162(7) 0.0163(7) 0.0175(7) -0.0007(6) 0.0094(6) -0.0015(6)
C63 0.0183(7) 0.0161(7) 0.0182(7) -0.0006(6) 0.0107(6) -0.0021(6)
C64 0.0180(7) 0.0164(7) 0.0171(7) 0.0007(6) 0.0092(6) -0.0017(6)
C65 0.0162(7) 0.0184(7) 0.0171(7) 0.0005(6) 0.0087(6) -0.0015(6)
C66 0.0156(7) 0.0175(7) 0.0175(7) 0.0012(6) 0.0091(6) -0.0005(6)
P4 0.01602(18) 0.01383(18) 0.01530(18) 0.00117(14) 0.00912(15) 0.00006(14)
P5 0.01551(18) 0.01360(18) 0.01883(19) -0.00108(14) 0.01076(15) -0.00175(14)
P6 0.01657(19) 0.0193(2) 0.01557(19) 0.00186(15) 0.00633(15) 0.00153(15)
S4 0.0250(2) 0.01854(19) 0.0231(2) -0.00442(15) 0.01484(17) -0.00126(15)
S5 0.02110(19) 0.0192(2) 0.0267(2) -0.00222(15) 0.01558(17) 0.00135(15)
S6 0.0325(2) 0.0269(2) 0.0293(2) 0.00748(18) 0.01275(19) 0.01224(19)
C67 0.0176(7) 0.0164(7) 0.0231(8) 0.0036(6) 0.0113(6) 0.0014(6)
C68 0.0444(11) 0.0201(9) 0.0369(10) 0.0004(7) 0.0289(9) 0.0026(8)
C69 0.0518(13) 0.0179(9) 0.0582(14) 0.0007(9) 0.0369(12) 0.0058(9)
C70 0.0447(12) 0.0201(9) 0.0627(15) 0.0167(9) 0.0324(11) 0.0109(8)
C71 0.0496(13) 0.0321(11) 0.0399(11) 0.0196(9) 0.0265(10) 0.0118(9)
C72 0.0343(10) 0.0245(9) 0.0247(9) 0.0067(7) 0.0152(8) 0.0049(7)
C73 0.0194(7) 0.0151(7) 0.0190(7) -0.0013(6) 0.0113(6) -0.0027(6)
C74 0.0171(7) 0.0196(8) 0.0254(8) 0.0017(6) 0.0105(6) 0.0004(6)
C75 0.0190(8) 0.0221(8) 0.0253(8) 0.0001(7) 0.0086(7) -0.0046(6)
C76 0.0280(9) 0.0156(8) 0.0238(8) -0.0011(6) 0.0115(7) -0.0039(6)
C77 0.0239(9) 0.0180(8) 0.0412(11) -0.0020(7) 0.0144(8) 0.0029(7)
C78 0.0186(8) 0.0202(8) 0.0367(10) -0.0037(7) 0.0137(7) -0.0011(6)
C79 0.0161(7) 0.0263(9) 0.0190(8) -0.0019(6) 0.0082(6) -0.0031(6)
C80 0.0206(8) 0.0414(11) 0.0188(8) -0.0002(7) 0.0073(7) -0.0033(7)
C81 0.0253(9) 0.0577(14) 0.0222(9) -0.0089(9) 0.0091(7) -0.0149(9)
C82 0.0364(11) 0.0465(13) 0.0342(11) -0.0195(9) 0.0217(9) -0.0229(9)
C83 0.0323(10) 0.0276(10) 0.0399(11) -0.0084(8) 0.0223(9) -0.0097(8)
C84 0.0196(8) 0.0265(9) 0.0254(8) -0.0028(7) 0.0112(7) -0.0042(7)
O7 0.0212(6) 0.0165(5) 0.0159(5) 0.0013(4) 0.0062(4) 0.0024(4)
C85 0.0297(9) 0.0209(8) 0.0189(8) -0.0017(6) 0.0095(7) -0.0001(7)
C86 0.0348(10) 0.0361(11) 0.0198(8) 0.0003(7) 0.0116(8) 0.0036(8)
O8 0.0131(5) 0.0249(6) 0.0207(6) 0.0010(5) 0.0059(4) 0.0000(4)
C87 0.0155(7) 0.0259(9) 0.0248(8) 0.0001(7) 0.0091(6) -0.0034(6)
C88 0.0267(9) 0.0378(11) 0.0314(10) 0.0015(8) 0.0115(8) 0.0098(8)
O9 0.0266(6) 0.0158(5) 0.0237(6) 0.0011(4) 0.0183(5) -0.0017(5)
C89 0.0376(10) 0.0222(9) 0.0278(9) -0.0005(7) 0.0245(8) 0.0010(7)
C90 0.0501(13) 0.0386(12) 0.0583(14) 0.0053(10) 0.0448(12) 0.0025(10)
O10 0.0262(6) 0.0220(6) 0.0159(5) 0.0021(4) 0.0100(5) -0.0037(5)
C91 0.0242(8) 0.0224(8) 0.0181(8) 0.0009(6) 0.0082(7) 0.0002(6)
C92 0.0362(10) 0.0306(10) 0.0190(8) 0.0007(7) 0.0115(7) 0.0051(8)
O11 0.0133(5) 0.0356(7) 0.0203(6) -0.0014(5) 0.0071(5) -0.0019(5)
C93 0.0190(9) 0.0690(16) 0.0219(9) -0.0101(9) 0.0066(7) -0.0035(9)
C94 0.0213(11) 0.168(4) 0.0352(13) -0.0378(18) 0.0103(10) -0.0176(16)
O12 0.0166(5) 0.0243(6) 0.0239(6) 0.0047(5) 0.0136(5) 0.0004(4)
C95 0.0213(8) 0.0257(9) 0.0191(8) 0.0019(6) 0.0097(6) -0.0033(7)
C96 0.0276(9) 0.0384(11) 0.0250(9) 0.0027(8) 0.0123(7) -0.0116(8)
 
_geom_special_details
;
 All esds (except the esd in the dihedral angle between two l.s. planes)
 are estimated using the full covariance matrix.  The cell esds are taken
 into account individually in the estimation of esds in distances, angles
 and torsion angles; correlations between esds in cell parameters are only
 used when they are defined by crystal symmetry.  An approximate (isotropic)
 treatment of cell esds is used for estimating esds involving l.s. planes.
;
 
loop_
 _geom_bond_atom_site_label_1
 _geom_bond_atom_site_label_2
 _geom_bond_distance
 _geom_bond_site_symmetry_2
 _geom_bond_publ_flag
C1 C2 1.404(2) . ?
C1 C13 1.412(2) . ?
C1 P1 1.8835(16) . ?
C2 O1 1.3514(19) . ?
C2 C3 1.468(2) . ?
C3 O2 1.3488(19) . ?
C3 C4 1.402(2) . ?
C4 C14 1.405(2) . ?
C4 P2 1.8559(16) . ?
C5 C15 1.408(2) . ?
C5 C6 1.410(2) . ?
C5 P2 1.8671(16) . ?
C6 O3 1.3547(19) . ?
C6 C7 1.453(2) . ?
C7 O4 1.3699(18) . ?
C7 C8 1.381(2) . ?
C8 C16 1.395(2) . ?
C8 P3 1.8339(16) . ?
C9 C10 1.405(2) . ?
C9 C17 1.410(2) . ?
C9 P3 1.8929(16) . ?
C10 O5 1.3547(19) . ?
C10 C11 1.459(2) . ?
C11 O6 1.3718(18) . ?
C11 C12 1.381(2) . ?
C12 C18 1.391(2) . ?
C12 P1 1.8395(16) . ?
C13 C14 1.380(2) . ?
C13 C18 1.426(2) . ?
C14 C15 1.430(2) . ?
C15 C16 1.383(2) . ?
C16 C17 1.421(2) . ?
C17 C18 1.382(2) . ?
P1 C19 1.8062(17) . ?
P1 S1 1.9494(6) . ?
P2 C25 1.8137(17) . ?
P2 S2 1.9503(6) . ?
P3 C31 1.8098(16) . ?
P3 S3 1.9433(6) . ?
C19 C24 1.389(3) . ?
C19 C20 1.395(3) . ?
C20 C21 1.394(3) . ?
C21 C22 1.383(4) . ?
C22 C23 1.379(4) . ?
C23 C24 1.394(3) . ?
C25 C26 1.394(2) . ?
C25 C30 1.398(2) . ?
C26 C27 1.392(3) . ?
C27 C28 1.390(3) . ?
C28 C29 1.386(3) . ?
C29 C30 1.389(3) . ?
C31 C32 1.391(2) . ?
C31 C36 1.396(2) . ?
C32 C33 1.393(2) . ?
C33 C34 1.386(3) . ?
C34 C35 1.389(3) . ?
C35 C36 1.388(2) . ?
O1 C37 1.449(2) . ?
C37 C38 1.506(2) . ?
O2 C39 1.448(2) . ?
C39 C40 1.503(2) . ?
O3 C41 1.438(2) . ?
C41 C42 1.498(3) . ?
O4 C43 1.451(2) . ?
C43 C44 1.508(3) . ?
O5 C45 1.4427(19) . ?
C45 C46 1.508(2) . ?
O6 C47 1.453(2) . ?
C47 C48 1.506(2) . ?
C49 C50 1.382(2) . ?
C49 C61 1.393(2) . ?
C49 P4 1.8448(16) . ?
C50 O7 1.3695(19) . ?
C50 C51 1.466(2) . ?
C51 O8 1.3529(19) . ?
C51 C52 1.406(2) . ?
C52 C62 1.408(2) . ?
C52 P5 1.8901(16) . ?
C53 C54 1.386(2) . ?
C53 C63 1.396(2) . ?
C53 P5 1.8373(16) . ?
C54 O9 1.3736(18) . ?
C54 C55 1.450(2) . ?
C55 O10 1.3545(19) . ?
C55 C56 1.409(2) . ?
C56 C64 1.404(2) . ?
C56 P6 1.8590(16) . ?
C57 C58 1.400(2) . ?
C57 C65 1.405(2) . ?
C57 P6 1.8588(16) . ?
C58 O11 1.3494(19) . ?
C58 C59 1.466(2) . ?
C59 O12 1.3524(18) . ?
C59 C60 1.393(2) . ?
C60 C66 1.411(2) . ?
C60 P4 1.8675(16) . ?
C61 C62 1.381(2) . ?
C61 C66 1.426(2) . ?
C62 C63 1.426(2) . ?
C63 C64 1.380(2) . ?
C64 C65 1.431(2) . ?
C65 C66 1.374(2) . ?
P4 C67 1.8101(17) . ?
P4 S4 1.9447(6) . ?
P5 C73 1.8085(16) . ?
P5 S5 1.9433(6) . ?
P6 C79 1.8152(18) . ?
P6 S6 1.9460(6) . ?
C67 C72 1.388(2) . ?
C67 C68 1.392(2) . ?
C68 C69 1.390(3) . ?
C69 C70 1.384(3) . ?
C70 C71 1.384(3) . ?
C71 C72 1.395(3) . ?
C73 C78 1.394(2) . ?
C73 C74 1.400(2) . ?
C74 C75 1.390(2) . ?
C75 C76 1.394(2) . ?
C76 C77 1.380(2) . ?
C77 C78 1.389(3) . ?
C79 C80 1.394(2) . ?
C79 C84 1.399(3) . ?
C80 C81 1.389(3) . ?
C81 C82 1.387(3) . ?
C82 C83 1.394(3) . ?
C83 C84 1.390(3) . ?
O7 C85 1.451(2) . ?
C85 C86 1.501(2) . ?
O8 C87 1.4375(19) . ?
C87 C88 1.513(3) . ?
O9 C89 1.455(2) . ?
C89 C90 1.511(3) . ?
O10 C91 1.443(2) . ?
C91 C92 1.513(2) . ?
O11 C93 1.433(2) . ?
C93 C94 1.494(3) . ?
O12 C95 1.447(2) . ?
C95 C96 1.510(2) . ?
 
loop_
 _geom_angle_atom_site_label_1
 _geom_angle_atom_site_label_2
 _geom_angle_atom_site_label_3
 _geom_angle
 _geom_angle_site_symmetry_1
 _geom_angle_site_symmetry_3
 _geom_angle_publ_flag
C2 C1 C13 115.24(14) . . ?
C2 C1 P1 139.27(12) . . ?
C13 C1 P1 105.48(11) . . ?
O1 C2 C1 126.41(15) . . ?
O1 C2 C3 112.12(14) . . ?
C1 C2 C3 121.46(14) . . ?
O2 C3 C4 126.58(15) . . ?
O2 C3 C2 112.52(13) . . ?
C4 C3 C2 120.88(14) . . ?
C3 C4 C14 115.93(14) . . ?
C3 C4 P2 138.18(13) . . ?
C14 C4 P2 105.60(11) . . ?
C15 C5 C6 115.95(14) . . ?
C15 C5 P2 104.82(11) . . ?
C6 C5 P2 139.22(12) . . ?
O3 C6 C5 127.32(14) . . ?
O3 C6 C7 111.90(13) . . ?
C5 C6 C7 120.78(14) . . ?
O4 C7 C8 120.44(14) . . ?
O4 C7 C6 118.69(14) . . ?
C8 C7 C6 120.79(14) . . ?
C7 C8 C16 117.78(14) . . ?
C7 C8 P3 134.76(12) . . ?
C16 C8 P3 107.44(11) . . ?
C10 C9 C17 115.58(14) . . ?
C10 C9 P3 140.12(12) . . ?
C17 C9 P3 104.30(11) . . ?
O5 C10 C9 127.14(14) . . ?
O5 C10 C11 112.27(13) . . ?
C9 C10 C11 120.59(14) . . ?
O6 C11 C12 120.18(14) . . ?
O6 C11 C10 118.62(14) . . ?
C12 C11 C10 121.15(14) . . ?
C11 C12 C18 117.58(14) . . ?
C11 C12 P1 134.98(12) . . ?
C18 C12 P1 107.37(11) . . ?
C14 C13 C1 123.29(15) . . ?
C14 C13 C18 119.84(14) . . ?
C1 C13 C18 116.86(14) . . ?
C13 C14 C4 123.04(14) . . ?
C13 C14 C15 119.80(14) . . ?
C4 C14 C15 117.15(14) . . ?
C16 C15 C5 122.73(14) . . ?
C16 C15 C14 119.37(14) . . ?
C5 C15 C14 117.89(14) . . ?
C15 C16 C8 121.92(14) . . ?
C15 C16 C17 121.48(14) . . ?
C8 C16 C17 116.60(14) . . ?
C18 C17 C9 123.37(14) . . ?
C18 C17 C16 118.41(14) . . ?
C9 C17 C16 118.23(14) . . ?
C17 C18 C12 121.72(15) . . ?
C17 C18 C13 121.07(14) . . ?
C12 C18 C13 117.21(14) . . ?
C19 P1 C12 107.23(7) . . ?
C19 P1 C1 107.89(8) . . ?
C12 P1 C1 92.99(7) . . ?
C19 P1 S1 113.05(6) . . ?
C12 P1 S1 113.34(5) . . ?
C1 P1 S1 120.14(6) . . ?
C25 P2 C4 107.37(8) . . ?
C25 P2 C5 105.35(7) . . ?
C4 P2 C5 94.35(7) . . ?
C25 P2 S2 115.54(6) . . ?
C4 P2 S2 114.45(6) . . ?
C5 P2 S2 117.36(6) . . ?
C31 P3 C8 103.85(7) . . ?
C31 P3 C9 108.55(7) . . ?
C8 P3 C9 93.41(7) . . ?
C31 P3 S3 114.50(5) . . ?
C8 P3 S3 115.70(5) . . ?
C9 P3 S3 118.16(5) . . ?
C24 C19 C20 120.48(17) . . ?
C24 C19 P1 121.33(14) . . ?
C20 C19 P1 118.09(14) . . ?
C21 C20 C19 119.8(2) . . ?
C22 C21 C20 119.4(2) . . ?
C23 C22 C21 120.8(2) . . ?
C22 C23 C24 120.5(2) . . ?
C19 C24 C23 119.0(2) . . ?
C26 C25 C30 120.27(16) . . ?
C26 C25 P2 119.36(13) . . ?
C30 C25 P2 120.37(14) . . ?
C27 C26 C25 119.73(17) . . ?
C28 C27 C26 119.65(19) . . ?
C29 C28 C27 120.82(18) . . ?
C28 C29 C30 119.83(18) . . ?
C29 C30 C25 119.69(18) . . ?
C32 C31 C36 119.74(15) . . ?
C32 C31 P3 120.73(12) . . ?
C36 C31 P3 119.50(12) . . ?
C31 C32 C33 119.95(15) . . ?
C34 C33 C32 120.04(16) . . ?
C33 C34 C35 120.22(16) . . ?
C36 C35 C34 119.94(16) . . ?
C35 C36 C31 120.10(16) . . ?
C2 O1 C37 117.48(13) . . ?
O1 C37 C38 109.03(15) . . ?
C3 O2 C39 117.22(13) . . ?
O2 C39 C40 108.25(14) . . ?
C6 O3 C41 118.14(13) . . ?
O3 C41 C42 108.70(16) . . ?
C7 O4 C43 114.30(12) . . ?
O4 C43 C44 107.15(15) . . ?
C10 O5 C45 117.00(12) . . ?
O5 C45 C46 108.53(14) . . ?
C11 O6 C47 114.99(12) . . ?
O6 C47 C48 107.40(14) . . ?
C50 C49 C61 117.26(14) . . ?
C50 C49 P4 135.53(12) . . ?
C61 C49 P4 107.18(11) . . ?
O7 C50 C49 120.22(14) . . ?
O7 C50 C51 118.49(14) . . ?
C49 C50 C51 121.23(14) . . ?
O8 C51 C52 128.79(14) . . ?
O8 C51 C50 110.68(13) . . ?
C52 C51 C50 120.52(14) . . ?
C51 C52 C62 115.47(14) . . ?
C51 C52 P5 140.13(12) . . ?
C62 C52 P5 104.40(11) . . ?
C54 C53 C63 117.43(14) . . ?
C54 C53 P5 135.25(12) . . ?
C63 C53 P5 107.32(12) . . ?
O9 C54 C53 120.59(14) . . ?
O9 C54 C55 118.52(14) . . ?
C53 C54 C55 120.89(14) . . ?
O10 C55 C56 126.47(15) . . ?
O10 C55 C54 112.84(13) . . ?
C56 C55 C54 120.68(14) . . ?
C64 C56 C55 116.09(14) . . ?
C64 C56 P6 105.25(11) . . ?
C55 C56 P6 138.38(13) . . ?
C58 C57 C65 115.88(14) . . ?
C58 C57 P6 138.62(12) . . ?
C65 C57 P6 105.34(11) . . ?
O11 C58 C57 127.18(15) . . ?
O11 C58 C59 111.99(13) . . ?
C57 C58 C59 120.82(14) . . ?
O12 C59 C60 125.72(14) . . ?
O12 C59 C58 112.80(14) . . ?
C60 C59 C58 121.48(14) . . ?
C59 C60 C66 115.67(14) . . ?
C59 C60 P4 137.87(12) . . ?
C66 C60 P4 106.04(11) . . ?
C62 C61 C49 121.86(15) . . ?
C62 C61 C66 121.06(14) . . ?
C49 C61 C66 117.05(14) . . ?
C61 C62 C52 123.62(15) . . ?
C61 C62 C63 118.12(14) . . ?
C52 C62 C63 118.26(14) . . ?
C64 C63 C53 122.03(15) . . ?
C64 C63 C62 121.43(14) . . ?
C53 C63 C62 116.50(14) . . ?
C63 C64 C56 122.79(14) . . ?
C63 C64 C65 119.66(14) . . ?
C56 C64 C65 117.50(14) . . ?
C66 C65 C57 123.15(14) . . ?
C66 C65 C64 119.40(14) . . ?
C57 C65 C64 117.40(14) . . ?
C65 C66 C60 122.97(15) . . ?
C65 C66 C61 120.31(14) . . ?
C60 C66 C61 116.67(14) . . ?
C67 P4 C49 106.47(7) . . ?
C67 P4 C60 109.37(7) . . ?
C49 P4 C60 92.98(7) . . ?
C67 P4 S4 113.98(6) . . ?
C49 P4 S4 116.40(5) . . ?
C60 P4 S4 115.51(5) . . ?
C73 P5 C53 104.46(7) . . ?
C73 P5 C52 107.48(7) . . ?
C53 P5 C52 93.51(7) . . ?
C73 P5 S5 114.49(5) . . ?
C53 P5 S5 116.38(5) . . ?
C52 P5 S5 117.93(5) . . ?
C79 P6 C57 105.78(8) . . ?
C79 P6 C56 108.71(7) . . ?
C57 P6 C56 94.30(7) . . ?
C79 P6 S6 115.73(6) . . ?
C57 P6 S6 116.39(6) . . ?
C56 P6 S6 113.63(6) . . ?
C72 C67 C68 120.27(16) . . ?
C72 C67 P4 119.03(13) . . ?
C68 C67 P4 120.69(13) . . ?
C69 C68 C67 119.67(18) . . ?
C70 C69 C68 119.99(19) . . ?
C71 C70 C69 120.51(19) . . ?
C70 C71 C72 119.84(19) . . ?
C67 C72 C71 119.70(18) . . ?
C78 C73 C74 119.63(15) . . ?
C78 C73 P5 120.51(12) . . ?
C74 C73 P5 119.83(12) . . ?
C75 C74 C73 119.89(16) . . ?
C74 C75 C76 119.93(16) . . ?
C77 C76 C75 120.17(16) . . ?
C76 C77 C78 120.31(17) . . ?
C77 C78 C73 120.04(16) . . ?
C80 C79 C84 120.07(17) . . ?
C80 C79 P6 120.39(14) . . ?
C84 C79 P6 119.54(13) . . ?
C81 C80 C79 119.8(2) . . ?
C82 C81 C80 120.14(19) . . ?
C81 C82 C83 120.33(19) . . ?
C84 C83 C82 119.8(2) . . ?
C83 C84 C79 119.78(17) . . ?
C50 O7 C85 114.22(12) . . ?
O7 C85 C86 107.32(14) . . ?
C51 O8 C87 122.15(13) . . ?
O8 C87 C88 110.36(15) . . ?
C54 O9 C89 114.08(12) . . ?
O9 C89 C90 107.40(15) . . ?
C55 O10 C91 116.67(13) . . ?
O10 C91 C92 107.81(14) . . ?
C58 O11 C93 118.29(13) . . ?
O11 C93 C94 107.68(17) . . ?
C59 O12 C95 116.57(13) . . ?
O12 C95 C96 107.44(14) . . ?
 
_refine_diff_density_max    1.926
_refine_diff_density_min   -0.628
_refine_diff_density_rms    0.078

_shelx_res_file
;

    masa1019.res created by SHELXL-2014/7

TITL masa1019
REM  Yadorkari-X generated
CELL 0.71073 27.0197 12.4870 28.2071 90.0000 113.7770 90.0000
ZERR 8.0 0.0019 0.0009 0.0020 0.0000 0.0010 0.0000
LATT 1
SYMM -x+1/2, y+1/2, -z+1/2
REM  SPGR P21/n monoclinic
SFAC C H O P S
UNIT 384 360 48 24 24
TEMP 23.0
L.S. 5
FMAP 2
PLAN -25
ACTA

WGHT    0.062100    7.186000
FVAR       0.04033   0.09215   0.95581   0.91619
C1    1    0.352589    0.315120    0.397047    11.00000    0.01678    0.02191 =
         0.01596    0.00312    0.00820    0.00005
C2    1    0.295958    0.309155    0.373001    11.00000    0.01758    0.02350 =
         0.01931    0.00113    0.01126   -0.00144
C3    1    0.266707    0.325007    0.316953    11.00000    0.01461    0.02106 =
         0.01943   -0.00099    0.00777   -0.00177
C4    1    0.294255    0.354310    0.286114    11.00000    0.01543    0.01935 =
         0.01595    0.00010    0.00676   -0.00120
C5    1    0.349840    0.417731    0.228790    11.00000    0.01491    0.01785 =
         0.01499    0.00014    0.00551   -0.00238
C6    1    0.380229    0.445853    0.200089    11.00000    0.01966    0.01440 =
         0.01452    0.00092    0.00729   -0.00190
C7    1    0.438908    0.450501    0.224678    11.00000    0.01895    0.01203 =
         0.01841   -0.00057    0.01116   -0.00263
C8    1    0.466228    0.428032    0.276766    11.00000    0.01510    0.01385 =
         0.01679   -0.00109    0.00824   -0.00216
C9    1    0.521698    0.384456    0.378895    11.00000    0.01587    0.01300 =
         0.01653   -0.00056    0.00888   -0.00096
C10   1    0.548311    0.358220    0.431637    11.00000    0.01533    0.01240 =
         0.01789   -0.00168    0.00663    0.00057
C11   1    0.517511    0.328212    0.461834    11.00000    0.01982    0.01329 =
         0.01489    0.00114    0.00771    0.00112
C12   1    0.461724    0.323333    0.439369    11.00000    0.01866    0.01421 =
         0.01600    0.00115    0.00963   -0.00035
C13   1    0.378443    0.341683    0.363966    11.00000    0.01502    0.02138 =
         0.01760    0.00249    0.00837   -0.00103
C14   1    0.350767    0.362236    0.311772    11.00000    0.01500    0.02113 =
         0.01682    0.00188    0.00787   -0.00134
C15   1    0.379867    0.393206    0.281401    11.00000    0.01530    0.01927 =
         0.01520    0.00133    0.00718   -0.00252
C16   1    0.435663    0.399385    0.304550    11.00000    0.01531    0.01763 =
         0.01553    0.00037    0.00760   -0.00191
C17   1    0.464800    0.376854    0.358073    11.00000    0.01537    0.01733 =
         0.01578    0.00072    0.00791   -0.00064
C18   1    0.436021    0.347870    0.386959    11.00000    0.01541    0.01875 =
         0.01540    0.00145    0.00717   -0.00041
P1    4    0.408728    0.296641    0.463115    11.00000    0.01733    0.01585 =
         0.01543    0.00177    0.00937    0.00047
P2    4    0.277691    0.400231    0.218850    11.00000    0.01432    0.01895 =
         0.01481    0.00105    0.00546   -0.00086
P3    4    0.537504    0.428294    0.322270    11.00000    0.01328    0.01323 =
         0.01576   -0.00047    0.00785   -0.00091
S1    5    0.413174    0.389388    0.520288    11.00000    0.03132    0.02151 =
         0.02505   -0.00462    0.01728   -0.00059
S2    5    0.231129    0.526166    0.198288    11.00000    0.02569    0.02351 =
         0.02453    0.00331    0.00971    0.00633
S3    5    0.585429    0.339107    0.303060    11.00000    0.02008    0.01747 =
         0.02283   -0.00204    0.01275    0.00227
C19   1    0.412307    0.155999    0.479132    11.00000    0.01955    0.01652 =
         0.02596    0.00176    0.01254   -0.00055
C20   1    0.423039    0.127893    0.530207    11.00000    0.03953    0.02289 =
         0.02713    0.00612    0.01089   -0.00120
AFIX  43
H1    2    0.425914    0.180712    0.554425    11.00000   -1.20000
AFIX   0
C21   1    0.429443    0.020440    0.544859    11.00000    0.05351    0.03059 =
         0.04555    0.01819    0.01678    0.00358
AFIX  43
H2    2    0.436045    0.001051    0.578711    11.00000   -1.20000
AFIX   0
C22   1    0.425894   -0.057045    0.508615    11.00000    0.05382    0.02072 =
         0.08184    0.01391    0.04062    0.00819
AFIX  43
H3    2    0.430644   -0.128720    0.518382    11.00000   -1.20000
AFIX   0
C23   1    0.415391   -0.029263    0.458143    11.00000    0.06685    0.02076 =
         0.08043   -0.01350    0.05471   -0.00654
AFIX  43
H4    2    0.413431   -0.082233    0.434272    11.00000   -1.20000
AFIX   0
C24   1    0.407691    0.077638    0.442652    11.00000    0.05683    0.02449 =
         0.04313   -0.00788    0.03744   -0.00740
AFIX  43
H5    2    0.399582    0.096210    0.408393    11.00000   -1.20000
AFIX   0
C25   1    0.253894    0.284626    0.176793    11.00000    0.01661    0.02173 =
         0.01853   -0.00190    0.00946   -0.00460
C26   1    0.279083    0.185867    0.193175    11.00000    0.02005    0.02423 =
         0.02243    0.00028    0.01123   -0.00265
AFIX  43
H6    2    0.308079    0.179748    0.225198    11.00000   -1.20000
AFIX   0
C27   1    0.260655    0.096475    0.161404    11.00000    0.03373    0.02360 =
         0.03549   -0.00346    0.02226   -0.00477
AFIX  43
H7    2    0.276894    0.030124    0.172327    11.00000   -1.20000
AFIX   0
C28   1    0.217844    0.106895    0.113256    11.00000    0.03760    0.03231 =
         0.03053   -0.01213    0.01870   -0.01430
AFIX  43
H8    2    0.205561    0.047124    0.092051    11.00000   -1.20000
AFIX   0
C29   1    0.193244    0.205259    0.096466    11.00000    0.02812    0.04015 =
         0.02228   -0.00743    0.00938   -0.01225
AFIX  43
H9    2    0.164971    0.211504    0.063979    11.00000   -1.20000
AFIX   0
C30   1    0.210921    0.294482    0.128281    11.00000    0.01882    0.02948 =
         0.02069    0.00051    0.00718   -0.00391
AFIX  43
H10   2    0.194250    0.360472    0.117364    11.00000   -1.20000
AFIX   0
C31   1    0.555326    0.568853    0.330019    11.00000    0.01649    0.01458 =
         0.01592   -0.00103    0.00864   -0.00191
C32   1    0.516790    0.646371    0.325767    11.00000    0.01634    0.01872 =
         0.02869   -0.00253    0.01122   -0.00135
AFIX  43
H11   2    0.481633    0.626119    0.319732    11.00000   -1.20000
AFIX   0
C33   1    0.530897    0.754336    0.330556    11.00000    0.02435    0.01704 =
         0.03222   -0.00158    0.01168    0.00252
AFIX  43
H12   2    0.505030    0.806242    0.327268    11.00000   -1.20000
AFIX   0
C34   1    0.583453    0.784469    0.340218    11.00000    0.02983    0.01569 =
         0.03000   -0.00189    0.01457   -0.00510
AFIX  43
H13   2    0.592979    0.856515    0.344169    11.00000   -1.20000
AFIX   0
C35   1    0.621948    0.707426    0.344019    11.00000    0.02125    0.02400 =
         0.03524   -0.00345    0.01578   -0.00781
AFIX  43
H14   2    0.657075    0.727939    0.350073    11.00000   -1.20000
AFIX   0
C36   1    0.607947    0.599825    0.338776    11.00000    0.01626    0.02010 =
         0.02938   -0.00233    0.01180   -0.00095
AFIX  43
H15   2    0.633658    0.548254    0.341099    11.00000   -1.20000
AFIX   0
O1    3    0.262089    0.291005    0.396654    11.00000    0.01888    0.03943 =
         0.02027    0.00035    0.01214   -0.00604
C37   1    0.282847    0.309000    0.452032    11.00000    0.02418    0.03661 =
         0.02166    0.00205    0.01195    0.00054
AFIX  23
H16   2    0.309469    0.366043    0.461778    11.00000   -1.20000
H17   2    0.300245    0.244514    0.470372    11.00000   -1.20000
AFIX   0
C38   1    0.236693    0.339158    0.466385    11.00000    0.02700    0.03515 =
         0.02835   -0.00137    0.01590   -0.00112
AFIX 137
H18   2    0.219452    0.402639    0.447888    11.00000   -1.50000
H19   2    0.250260    0.352398    0.502970    11.00000   -1.50000
H20   2    0.210945    0.281660    0.457446    11.00000   -1.50000
AFIX   0
O2    3    0.212884    0.311142    0.300940    11.00000    0.01330    0.03426 =
         0.01943   -0.00328    0.00791   -0.00417
C39   1    0.182465    0.286329    0.246722    11.00000    0.01758    0.03902 =
         0.01868   -0.00400    0.00684   -0.00633
AFIX  23
H21   2    0.199857    0.228560    0.236232    11.00000   -1.20000
H22   2    0.180884    0.348603    0.225602    11.00000   -1.20000
AFIX   0
C40   1    0.126361    0.253590    0.239517    11.00000    0.02093    0.07397 =
         0.02628   -0.01334    0.01008   -0.01680
AFIX 137
H23   2    0.128225    0.190379    0.259540    11.00000   -1.50000
H24   2    0.105190    0.239007    0.203552    11.00000   -1.50000
H25   2    0.109824    0.310467    0.250856    11.00000   -1.50000
AFIX   0
O3    3    0.361115    0.471040    0.149100    11.00000    0.02077    0.02498 =
         0.01437    0.00337    0.00657   -0.00169
C41   1    0.304229    0.492407    0.122219    11.00000    0.02230    0.07186 =
         0.02354    0.01420    0.00676   -0.00295
AFIX  23
H26   2    0.293387    0.547985    0.140097    11.00000   -1.20000
H27   2    0.283608    0.428254    0.121275    11.00000   -1.20000
AFIX   0
C42   1    0.293359    0.527835    0.068197    11.00000    0.03259    0.04557 =
         0.02074    0.00784    0.00691   -0.00076
AFIX 137
H28   2    0.312809    0.592836    0.069417    11.00000   -1.50000
H29   2    0.255311    0.540196    0.049514    11.00000   -1.50000
H30   2    0.304991    0.473181    0.051034    11.00000   -1.50000
AFIX   0
O4    3    0.466593    0.482500    0.195761    11.00000    0.02274    0.01484 =
         0.01996    0.00163    0.01463   -0.00163
C43   1    0.485087    0.395208    0.173060    11.00000    0.03701    0.01945 =
         0.02593   -0.00141    0.02260    0.00027
AFIX  23
H31   2    0.455725    0.369381    0.141988    11.00000   -1.20000
H32   2    0.498034    0.336340    0.197416    11.00000   -1.20000
AFIX   0
C44   1    0.530247    0.438379    0.160090    11.00000    0.06255    0.03033 =
         0.07018    0.00308    0.05736    0.00263
AFIX 137
H33   2    0.517181    0.497766    0.136715    11.00000   -1.50000
H34   2    0.542855    0.383126    0.144034    11.00000   -1.50000
H35   2    0.559460    0.461733    0.191264    11.00000   -1.50000
AFIX   0
O5    3    0.602378    0.355862    0.460214    11.00000    0.01407    0.02036 =
         0.01847    0.00143    0.00589    0.00087
C45   1    0.636627    0.394909    0.435811    11.00000    0.01597    0.02651 =
         0.02030   -0.00067    0.00878   -0.00024
AFIX  23
H36   2    0.624444    0.465034    0.420869    11.00000   -1.20000
H37   2    0.635019    0.346659    0.408277    11.00000   -1.20000
AFIX   0
C46   1    0.693827    0.401784    0.476211    11.00000    0.01745    0.03916 =
         0.02525   -0.00074    0.00734   -0.00159
AFIX 137
H38   2    0.695476    0.452810    0.502264    11.00000   -1.50000
H39   2    0.717420    0.424119    0.460168    11.00000   -1.50000
H40   2    0.704995    0.332798    0.491919    11.00000   -1.50000
AFIX   0
O6    3    0.545189    0.300300    0.512820    11.00000    0.02139    0.01634 =
         0.01440    0.00177    0.00491    0.00214
C47   1    0.558696    0.388976    0.549206    11.00000    0.02567    0.02013 =
         0.01640   -0.00125    0.00631    0.00104
AFIX  23
H41   2    0.528981    0.439603    0.539050    11.00000   -1.20000
H42   2    0.590551    0.425989    0.549917    11.00000   -1.20000
AFIX   0
C48   1    0.569332    0.343004    0.601784    11.00000    0.03211    0.03233 =
         0.01842    0.00195    0.01016    0.00432
AFIX 137
H43   2    0.536884    0.310497    0.601177    11.00000   -1.50000
H44   2    0.580529    0.399194    0.627161    11.00000   -1.50000
H45   2    0.597361    0.290015    0.610530    11.00000   -1.50000
AFIX   0
C49   1    0.542495    0.187166    0.064982    11.00000    0.01794    0.01385 =
         0.01733    0.00094    0.01030    0.00111
C50   1    0.487091    0.176457    0.039243    11.00000    0.01834    0.01257 =
         0.01748    0.00070    0.00894    0.00124
C51   1    0.453461    0.145805    0.066835    11.00000    0.01544    0.01255 =
         0.01994   -0.00140    0.00876   -0.00028
C52   1    0.477100    0.124857    0.120322    11.00000    0.01643    0.01362 =
         0.01934   -0.00100    0.01042   -0.00090
C53   1    0.527253    0.086315    0.223613    11.00000    0.01651    0.01410 =
         0.01976   -0.00157    0.01046   -0.00257
C54   1    0.552291    0.065191    0.276228    11.00000    0.02296    0.01151 =
         0.02162    0.00045    0.01518   -0.00172
C55   1    0.610183    0.078922    0.304168    11.00000    0.02290    0.01327 =
         0.01572    0.00156    0.00934    0.00005
C56   1    0.642667    0.109203    0.277944    11.00000    0.01808    0.01564 =
         0.01699   -0.00014    0.00871   -0.00093
C57   1    0.703568    0.162344    0.224431    11.00000    0.01658    0.01813 =
         0.01527    0.00064    0.00675   -0.00002
C58   1    0.733613    0.187845    0.195497    11.00000    0.01321    0.01883 =
         0.02021   -0.00114    0.00750   -0.00076
C59   1    0.706613    0.211978    0.140069    11.00000    0.01825    0.01594 =
         0.02042    0.00046    0.01217   -0.00092
C60   1    0.650509    0.208653    0.114145    11.00000    0.01728    0.01525 =
         0.01605    0.00142    0.00921   -0.00026
C61   1    0.564851    0.169300    0.118251    11.00000    0.01663    0.01636 =
         0.01738    0.00066    0.00917   -0.00090
C62   1    0.533547    0.138915    0.144423    11.00000    0.01620    0.01627 =
         0.01747   -0.00073    0.00936   -0.00153
C63   1    0.559963    0.119821    0.198742    11.00000    0.01829    0.01606 =
         0.01819   -0.00056    0.01071   -0.00207
C64   1    0.615285    0.130262    0.224767    11.00000    0.01795    0.01637 =
         0.01709    0.00069    0.00919   -0.00167
C65   1    0.647170    0.159810    0.196831    11.00000    0.01623    0.01836 =
         0.01713    0.00050    0.00872   -0.00154
C66   1    0.622021    0.180385    0.144627    11.00000    0.01564    0.01751 =
         0.01753    0.00124    0.00910   -0.00049
P4    4    0.598900    0.216727    0.046007    11.00000    0.01602    0.01383 =
         0.01530    0.00117    0.00912    0.00006
P5    4    0.457492    0.080103    0.174410    11.00000    0.01551    0.01360 =
         0.01883   -0.00108    0.01076   -0.00175
P6    4    0.715736    0.119558    0.291339    11.00000    0.01657    0.01927 =
         0.01557    0.00186    0.00633    0.00153
S4    5    0.609099    0.117620   -0.002479    11.00000    0.02502    0.01854 =
         0.02315   -0.00442    0.01484   -0.00126
S5    5    0.404217    0.164728    0.187919    11.00000    0.02110    0.01916 =
         0.02671   -0.00222    0.01558    0.00135
S6    5    0.755277   -0.013788    0.315179    11.00000    0.03250    0.02693 =
         0.02930    0.00748    0.01275    0.01224
C67   1    0.590877    0.354894    0.024818    11.00000    0.01765    0.01640 =
         0.02311    0.00361    0.01127    0.00141
C68   1    0.586554    0.436080    0.056776    11.00000    0.04436    0.02009 =
         0.03689    0.00036    0.02888    0.00261
AFIX  43
H46   2    0.587515    0.419726    0.089301    11.00000   -1.20000
AFIX   0
C69   1    0.580795    0.541718    0.039814    11.00000    0.05178    0.01792 =
         0.05821    0.00074    0.03687    0.00580
AFIX  43
H47   2    0.576946    0.596029    0.060634    11.00000   -1.20000
AFIX   0
C70   1    0.580792    0.566039   -0.008060    11.00000    0.04471    0.02010 =
         0.06266    0.01672    0.03242    0.01092
AFIX  43
H48   2    0.577680    0.636949   -0.018969    11.00000   -1.20000
AFIX   0
C71   1    0.585383    0.485667   -0.039815    11.00000    0.04957    0.03214 =
         0.03988    0.01957    0.02648    0.01177
AFIX  43
H49   2    0.585268    0.502534   -0.071973    11.00000   -1.20000
AFIX   0
C72   1    0.590183    0.379260   -0.023474    11.00000    0.03432    0.02447 =
         0.02471    0.00669    0.01521    0.00488
AFIX  43
H50   2    0.592907    0.324896   -0.044831    11.00000   -1.20000
AFIX   0
C73   1    0.442455   -0.061485    0.165717    11.00000    0.01941    0.01514 =
         0.01901   -0.00132    0.01126   -0.00266
C74   1    0.389241   -0.097037    0.151512    11.00000    0.01708    0.01955 =
         0.02535    0.00170    0.01049    0.00044
AFIX  43
H51   2    0.361658   -0.047889    0.146245    11.00000   -1.20000
AFIX   0
C75   1    0.377709   -0.205905    0.145295    11.00000    0.01900    0.02212 =
         0.02531    0.00015    0.00864   -0.00460
AFIX  43
H52   2    0.342318   -0.229630    0.135411    11.00000   -1.20000
AFIX   0
C76   1    0.419250   -0.279511    0.153891    11.00000    0.02799    0.01560 =
         0.02383   -0.00105    0.01149   -0.00387
AFIX  43
H53   2    0.411472   -0.352301    0.149396    11.00000   -1.20000
AFIX   0
C77   1    0.471878   -0.244630    0.169052    11.00000    0.02392    0.01801 =
         0.04125   -0.00204    0.01441    0.00293
AFIX  43
H54   2    0.499560   -0.294149    0.175543    11.00000   -1.20000
AFIX   0
C78   1    0.483704   -0.135896    0.174664    11.00000    0.01860    0.02018 =
         0.03673   -0.00372    0.01369   -0.00114
AFIX  43
H55   2    0.519165   -0.112745    0.184396    11.00000   -1.20000
AFIX   0
C79   1    0.743693    0.235652    0.332125    11.00000    0.01613    0.02627 =
         0.01900   -0.00190    0.00822   -0.00311
C80   1    0.787637    0.224579    0.379646    11.00000    0.02057    0.04144 =
         0.01885   -0.00024    0.00729   -0.00330
AFIX  43
H56   2    0.802598    0.157350    0.390836    11.00000   -1.20000
AFIX   0
C81   1    0.809034    0.314174    0.410250    11.00000    0.02526    0.05767 =
         0.02217   -0.00892    0.00909   -0.01487
AFIX  43
H57   2    0.838308    0.306871    0.442003    11.00000   -1.20000
AFIX   0
C82   1    0.786840    0.414512    0.393563    11.00000    0.03644    0.04654 =
         0.03422   -0.01953    0.02168   -0.02289
AFIX  43
H58   2    0.801311    0.474281    0.414187    11.00000   -1.20000
AFIX   0
C83   1    0.742956    0.426222    0.346041    11.00000    0.03227    0.02758 =
         0.03990   -0.00842    0.02234   -0.00969
AFIX  43
H59   2    0.728156    0.493626    0.335000    11.00000   -1.20000
AFIX   0
C84   1    0.721360    0.336885    0.315181    11.00000    0.01963    0.02652 =
         0.02535   -0.00283    0.01122   -0.00419
AFIX  43
H60   2    0.692168    0.344386    0.283384    11.00000   -1.20000
AFIX   0
O7    3    0.462161    0.198941   -0.012584    11.00000    0.02120    0.01654 =
         0.01591    0.00134    0.00616    0.00245
C85   1    0.453473    0.106142   -0.045972    11.00000    0.02970    0.02086 =
         0.01888   -0.00170    0.00955   -0.00009
AFIX  23
H61   2    0.426500    0.059346   -0.042448    11.00000   -1.20000
H62   2    0.486857    0.066167   -0.036685    11.00000   -1.20000
AFIX   0
C86   1    0.434429    0.146372   -0.100596    11.00000    0.03483    0.03607 =
         0.01982    0.00032    0.01161    0.00365
AFIX 137
H63   2    0.402701    0.189620   -0.108582    11.00000   -1.50000
H64   2    0.425985    0.086652   -0.123972    11.00000   -1.50000
H65   2    0.462419    0.188580   -0.104179    11.00000   -1.50000
AFIX   0
O8    3    0.400726    0.140947    0.033859    11.00000    0.01310    0.02495 =
         0.02070    0.00099    0.00589    0.00004
C87   1    0.358418    0.123669    0.051625    11.00000    0.01549    0.02591 =
         0.02478    0.00011    0.00908   -0.00336
AFIX  23
H66   2    0.373046    0.087343    0.084834    11.00000   -1.20000
H67   2    0.330668    0.078359    0.027178    11.00000   -1.20000
AFIX   0
C88   1    0.333791    0.229375    0.057029    11.00000    0.02674    0.03776 =
         0.03142    0.00148    0.01151    0.00985
AFIX 137
H68   2    0.361149    0.273541    0.081769    11.00000   -1.50000
H69   2    0.305457    0.216621    0.068659    11.00000   -1.50000
H70   2    0.319145    0.265021    0.024088    11.00000   -1.50000
AFIX   0
O9    3    0.522785    0.029611    0.302967    11.00000    0.02655    0.01576 =
         0.02368    0.00110    0.01834   -0.00175
C89   1    0.498725    0.114836    0.321833    11.00000    0.03763    0.02216 =
         0.02783   -0.00051    0.02455    0.00101
AFIX  23
H71   2    0.486787    0.172740    0.296828    11.00000   -1.20000
H72   2    0.524978    0.143044    0.354267    11.00000   -1.20000
AFIX   0
C90   1    0.451155    0.067404    0.329697    11.00000    0.05005    0.03859 =
         0.05826    0.00527    0.04480    0.00248
AFIX 137
H73   2    0.426497    0.036021    0.297856    11.00000   -1.50000
H74   2    0.433000    0.122734    0.340152    11.00000   -1.50000
H75   2    0.463737    0.013313    0.356080    11.00000   -1.50000
AFIX   0
O10   3    0.627165    0.061016    0.355688    11.00000    0.02617    0.02198 =
         0.01595    0.00210    0.01004   -0.00371
C91   1    0.676053    0.114882    0.389104    11.00000    0.02417    0.02239 =
         0.01810    0.00092    0.00818    0.00025
AFIX  23
H76   2    0.675876    0.188323    0.377831    11.00000   -1.20000
H77   2    0.707394    0.078898    0.388017    11.00000   -1.20000
AFIX   0
C92   1    0.678332    0.112491    0.443577    11.00000    0.03617    0.03059 =
         0.01901    0.00070    0.01146    0.00514
AFIX 137
H78   2    0.649482    0.155244    0.445106    11.00000   -1.50000
H79   2    0.712408    0.140708    0.467225    11.00000   -1.50000
H80   2    0.674551    0.040004    0.452961    11.00000   -1.50000
AFIX   0
O11   3    0.787964    0.191500    0.212493    11.00000    0.01326    0.03557 =
         0.02027   -0.00142    0.00714   -0.00194
C93   1    0.819338    0.206135    0.266843    11.00000    0.01902    0.06895 =
         0.02194   -0.01011    0.00662   -0.00353
AFIX  23
H81   2    0.814380    0.145763    0.286127    11.00000   -1.20000
H82   2    0.808031    0.270718    0.278813    11.00000   -1.20000
AFIX   0
C94   1    0.877329    0.214842    0.274893    11.00000    0.02126    0.16776 =
         0.03519   -0.03776    0.01028   -0.01760
AFIX 137
H83   2    0.886827    0.154746    0.259037    11.00000   -1.50000
H84   2    0.899737    0.215436    0.311340    11.00000   -1.50000
H85   2    0.882690    0.279939    0.259478    11.00000   -1.50000
AFIX   0
O12   3    0.741766    0.236733    0.118586    11.00000    0.01660    0.02428 =
         0.02391    0.00470    0.01355    0.00041
C95   1    0.722093    0.307715    0.074268    11.00000    0.02132    0.02573 =
         0.01912    0.00191    0.00971   -0.00330
AFIX  23
H86   2    0.701067    0.365329    0.080015    11.00000   -1.20000
H87   2    0.699220    0.268724    0.043466    11.00000   -1.20000
AFIX   0
C96   1    0.770803    0.352410    0.067538    11.00000    0.02761    0.03842 =
         0.02496    0.00269    0.01229   -0.01156
AFIX 137
H88   2    0.793829    0.388386    0.098730    11.00000   -1.50000
H89   2    0.759124    0.402249    0.039222    11.00000   -1.50000
H90   2    0.790416    0.295004    0.060385    11.00000   -1.50000

AFIX   0
HKLF 4 1 1 0 0 0 1 0 0 0 1

REM  masa1019
REM R1 =  0.0404 for   18293 Fo > 4sig(Fo)  and  0.0471 for all   20861 data
REM   1096 parameters refined using      0 restraints

END

WGHT      0.0621      7.1838

REM Highest difference peak  1.926,  deepest hole -0.628,  1-sigma level  0.078
Q1    1   0.3836  0.3828  0.4974  11.00000  0.05    1.93
Q2    1   0.7801  0.0270  0.3326  11.00000  0.05    1.03
Q3    1   0.4841  0.0761  0.1970  11.00000  0.05    0.96
Q4    1   0.4281  0.1641  0.2139  11.00000  0.05    0.89
Q5    1   0.3817  0.2961  0.4350  11.00000  0.05    0.77
Q6    1   0.2486  0.5185  0.1850  11.00000  0.05    0.74
Q7    1   0.6233  0.2177  0.0725  11.00000  0.05    0.72
Q8    1   0.7380  0.1523  0.3124  11.00000  0.05    0.62
Q9    1   0.6312  0.1455  0.2095  11.00000  0.05    0.58
Q10   1   0.4492  0.3297  0.4132  11.00000  0.05    0.57
Q11   1   0.5905  0.1680  0.1313  11.00000  0.05    0.56
Q12   1   0.4092  0.3892  0.2902  11.00000  0.05    0.56
Q13   1   0.7797 -0.0138  0.3056  11.00000  0.05    0.56
Q14   1   0.4504  0.3887  0.3310  11.00000  0.05    0.56
Q15   1   0.2672  0.3615  0.1975  11.00000  0.05    0.56
Q16   1   0.6752  0.1632  0.2095  11.00000  0.05    0.55
Q17   1   0.4504  0.4122  0.2912  11.00000  0.05    0.55
Q18   1   0.4923  0.3803  0.3666  11.00000  0.05    0.55
Q19   1   0.5066  0.4292  0.2973  11.00000  0.05    0.55
Q20   1   0.5808  0.0688  0.2897  11.00000  0.05    0.54
Q21   1   0.5904  0.1219  0.2150  11.00000  0.05    0.53
Q22   1   0.5311  0.3509  0.4463  11.00000  0.05    0.53
Q23   1   0.4712  0.1583  0.0523  11.00000  0.05    0.52
Q24   1   0.4078  0.3397  0.3744  11.00000  0.05    0.52
Q25   1   0.6303  0.1193  0.2521  11.00000  0.05    0.52
;
_shelx_res_checksum   10828

_shelx_hkl_file
;
  -1   0   0   -0.08    0.00
   1   0   0   -0.08    0.00
  -2   0   0   51.78    1.41
  -2   0   0   51.58    1.22
  -3   0   0   -1.10    0.01
  -3   0   0   -1.11    0.01
   3   0   0   -1.11    0.01
   3   0   0   -1.13    0.01
   4   0   0   39.82    0.92
  -4   0   0   37.96    0.96
   4   0   0   41.90    0.92
  -4   0   0   41.08    0.94
  -5   0   0   -0.01    0.01
   5   0   0    0.00    0.01
   5   0   0    0.02    0.01
  -5   0   0    0.05    0.02
   6   0   0  763.00   17.54
   6   0   0  747.65   17.86
  -6   0   0  745.59   18.14
  -7   0   0    0.17    0.02
   8   0   0    0.35    0.03
  -8   0   0    0.35    0.04
  -8   0   0    0.36    0.03
   8   0   0    0.36    0.03
   9   0   0    0.03    0.02
  -9   0   0   -0.01    0.02
   9   0   0    0.00    0.01
  -9   0   0   -0.02    0.02
  10   0   0   19.97    0.46
  10   0   0   20.31    0.46
 -10   0   0   18.64    0.47
 -10   0   0   20.13    0.47
  11   0   0    0.02    0.02
 -11   0   0    0.02    0.02
  12   0   0   60.57    1.38
 -12   0   0   60.23    1.40
  12   0   0   62.30    1.37
 -12   0   0   58.58    1.42
  14   0   0    9.49    0.23
 -14   0   0    9.28    0.25
  14   0   0    9.27    0.24
 -14   0   0   10.08    0.24
 -16   0   0   99.28    2.28
  16   0   0   98.40    2.24
 -16   0   0   95.92    2.32
  16   0   0  101.10    2.25
 -18   0   0   11.53    0.27
  18   0   0   10.26    0.27
 -18   0   0    9.75    0.27
 -22   0   0   11.96    0.33
  22   0   0   12.57    0.32
 -24   0   0    2.86    0.12
  24   0   0    2.86    0.11
 -25   0   0    0.05    0.05
  25   0   0    0.03    0.04
 -26   0   0    1.11    0.09
  26   0   0    1.20    0.08
  27   0   0   -0.01    0.05
 -27   0   0    0.01    0.05
  28   0   0    0.17    0.05
 -28   0   0    0.23    0.05
  29   0   0    0.02    0.05
 -29   0   0    0.13    0.06
  30   0   0    3.22    0.14
 -30   0   0    3.47    0.14
 -31   0   0    0.10    0.06
  31   0   0    0.06    0.06
   0   1   0   -0.15    0.00
   0   1   0   -0.15    0.00
   0   1   0   -0.15    0.01
   0   1   0   -0.15    0.01
  -1   1   0    1.04    0.03
  -1   1   0    0.95    0.03
   1   1   0    0.99    0.03
  -1   1   0    0.96    0.03
  -1   1   0    0.94    0.03
   2  -1   0    1.47    0.04
  -2  -1   0    1.68    0.04
   2   1   0    1.46    0.04
  -2   1   0    1.68    0.04
   2   1   0    1.73    0.04
  -2   1   0    1.56    0.04
   3  -1   0    0.18    0.02
  -3  -1   0    0.26    0.02
   3   1   0    0.18    0.01
  -3   1   0    0.14    0.01
  -3   1   0    0.19    0.01
   3   1   0    0.18    0.01
   4  -1   0    3.05    0.08
  -4  -1   0    2.96    0.07
  -4  -1   0    2.83    0.08
   4   1   0    3.05    0.08
  -4   1   0    3.17    0.08
  -4   1   0    2.89    0.08
   4   1   0    3.07    0.08
   5  -1   0    0.01    0.01
  -5  -1   0    0.00    0.02
  -5  -1   0   -0.03    0.01
   5   1   0   -0.02    0.02
  -5   1   0   -0.02    0.02
  -5   1   0   -0.02    0.02
   5   1   0   -0.03    0.01
  -6  -1   0    1.14    0.04
   6  -1   0    1.16    0.04
  -6  -1   0    1.07    0.04
  -6   1   0    0.94    0.04
   6   1   0    1.24    0.04
  -6   1   0    1.10    0.05
   6   1   0    1.01    0.04
  -7  -1   0    3.67    0.10
  -7  -1   0    3.99    0.10
  -7   1   0    3.78    0.10
   7   1   0    4.12    0.10
  -7   1   0    3.65    0.10
   7   1   0    3.87    0.10
  -8  -1   0    0.32    0.03
   8  -1   0    0.29    0.02
  -8  -1   0    0.30    0.02
   8  -1   0    0.32    0.03
  -8   1   0    0.27    0.03
  -8   1   0    0.33    0.03
   8   1   0    0.31    0.03
   8   1   0    0.25    0.02
   9  -1   0    0.66    0.02
  -9  -1   0    0.73    0.04
   9  -1   0    0.73    0.04
  -9  -1   0    0.74    0.03
   9   1   0    0.71    0.03
  -9   1   0    0.67    0.04
  -9   1   0    0.67    0.04
   9   1   0    0.67    0.04
  10  -1   0    1.67    0.05
 -10  -1   0    1.64    0.06
  10  -1   0    1.85    0.06
 -10  -1   0    1.67    0.05
 -10   1   0    1.72    0.06
  10   1   0    1.61    0.06
  10   1   0    1.82    0.06
 -10   1   0    1.67    0.06
  11  -1   0    0.61    0.04
 -11  -1   0    0.69    0.05
 -11  -1   0    0.66    0.04
  11  -1   0    0.61    0.02
  11   1   0    0.61    0.04
  11   1   0    0.61    0.04
 -11   1   0    0.54    0.04
 -11   1   0    0.66    0.05
  12  -1   0    1.94    0.07
 -12  -1   0    2.03    0.07
 -12  -1   0    1.85    0.06
 -12   1   0    1.86    0.07
 -12   1   0    1.78    0.07
  12   1   0    1.89    0.07
  12   1   0    1.86    0.06
 -13  -1   0    1.65    0.07
 -13  -1   0    1.60    0.06
  13  -1   0    1.69    0.06
  13   1   0    1.53    0.06
 -13   1   0    1.42    0.06
 -13   1   0    1.59    0.06
  13   1   0    1.56    0.06
 -14  -1   0    6.61    0.17
  14  -1   0    6.63    0.17
 -14  -1   0    6.12    0.17
 -14   1   0    6.31    0.17
 -14   1   0    6.51    0.17
  14   1   0    6.45    0.17
  14   1   0    6.52    0.16
 -14   1   0    6.03    0.15
 -15  -1   0    1.70    0.06
 -15  -1   0    1.81    0.07
  15  -1   0    1.74    0.07
  15   1   0    1.60    0.06
  15   1   0    1.71    0.07
 -15   1   0    1.74    0.07
 -15   1   0    1.78    0.07
 -16  -1   0    0.40    0.03
 -16  -1   0    0.30    0.04
  16  -1   0    0.33    0.04
  16   1   0    0.46    0.04
 -16   1   0    0.31    0.04
 -16   1   0    0.34    0.04
  16   1   0    0.39    0.04
  17  -1   0   18.64    0.44
 -17  -1   0   18.26    0.44
 -17  -1   0   18.31    0.45
 -17   1   0   18.16    0.45
  17   1   0   18.23    0.43
 -17   1   0   17.84    0.44
  17   1   0   17.77    0.44
 -18  -1   0    0.40    0.04
  18  -1   0    0.31    0.04
 -18  -1   0    0.37    0.04
  18   1   0    0.38    0.04
 -18   1   0    0.40    0.04
 -18   1   0    0.37    0.04
 -19  -1   0    7.63    0.22
 -19  -1   0    8.12    0.21
  19  -1   0    8.04    0.21
 -19   1   0    8.14    0.22
  19   1   0    7.83    0.21
 -19   1   0    8.18    0.22
  20  -1   0    3.25    0.11
 -20  -1   0    2.97    0.11
 -20   1   0    3.17    0.11
  20   1   0    3.12    0.11
 -20   1   0    3.05    0.11
 -21  -1   0    0.17    0.04
  21  -1   0    0.09    0.04
  21   1   0    0.11    0.04
 -21   1   0    0.08    0.04
 -21   1   0    0.04    0.04
  22  -1   0    0.17    0.04
 -22  -1   0    0.27    0.05
 -22   1   0    0.21    0.05
 -22   1   0    0.24    0.05
  22   1   0    0.17    0.04
  23  -1   0    0.84    0.07
 -23  -1   0    0.85    0.07
 -23   1   0    0.89    0.07
 -23   1   0    0.78    0.07
  23   1   0    0.90    0.07
 -24  -1   0    1.05    0.08
  24  -1   0    1.07    0.07
 -24   1   0    1.04    0.07
  24   1   0    1.04    0.07
  25  -1   0    2.81    0.11
 -25  -1   0    2.71    0.11
  25   1   0    2.60    0.11
 -25   1   0    2.64    0.11
 -26  -1   0    1.31    0.08
  26  -1   0    1.40    0.09
 -26   1   0    1.36    0.08
  26   1   0    1.40    0.09
  27  -1   0    0.21    0.05
 -27  -1   0    0.11    0.05
  27   1   0    0.10    0.05
 -27   1   0    0.09    0.05
 -28  -1   0    0.41    0.06
  28  -1   0    0.40    0.06
 -28   1   0    0.42    0.06
  28   1   0    0.48    0.06
  29  -1   0    0.72    0.07
 -29  -1   0    0.55    0.07
  29   1   0    0.72    0.07
 -29   1   0    0.79    0.08
  30  -1   0    1.66    0.09
 -30  -1   0    1.44    0.10
 -30   1   0    1.72    0.11
  30   1   0    1.42    0.09
  31  -1   0    0.70    0.07
 -31  -1   0    0.62    0.08
 -31   1   0    0.80    0.08
  31   1   0    0.75    0.08
   0   2   0  101.39    2.27
   0   2   0   96.38    2.82
   0   2   0   97.27    2.31
   0   2   0  101.02    2.29
  -1  -2   0  144.03    3.40
  -1   2   0  145.56    3.41
   1   2   0  146.54    3.42
  -1   2   0  146.38    3.32
  -1   2   0  144.88    3.35
   1   2   0  137.57    3.29
   1   2   0  148.19    3.32
  -1   2   0  145.12    3.29
  -2  -2   0   81.16    1.91
  -2   2   0   83.48    1.85
   2   2   0   78.52    1.86
   2   2   0   80.14    1.84
  -2   2   0   81.09    1.91
  -2   2   0   80.22    1.88
   2   2   0   81.02    1.86
  -2   2   0   79.17    2.17
  -3  -2   0    4.37    0.11
   3  -2   0    4.27    0.11
   3   2   0    4.39    0.11
   3   2   0    4.34    0.11
  -3   2   0    4.31    0.11
  -3   2   0    4.27    0.11
  -3   2   0    4.42    0.10
  -4  -2   0    8.62    0.21
   4  -2   0    8.42    0.20
  -4   2   0    8.45    0.21
  -4   2   0    8.53    0.20
   4   2   0    8.70    0.20
  -4   2   0    8.06    0.21
   4   2   0    8.32    0.20
   5  -2   0   85.27    2.04
   5  -2   0   88.04    2.56
  -5  -2   0   90.25    2.12
   5   2   0   92.05    2.07
   5   2   0   90.30    2.05
  -5   2   0   88.82    2.12
  -5   2   0   91.23    2.08
   6  -2   0    0.43    0.03
  -6  -2   0    0.44    0.03
  -6  -2   0    0.43    0.02
   6   2   0    0.48    0.03
  -6   2   0    0.35    0.03
   6   2   0    0.44    0.03
  -6   2   0    0.41    0.03
  -7  -2   0   10.25    0.24
  -7  -2   0    9.21    0.23
  -7   2   0   10.14    0.24
  -7   2   0    9.82    0.24
   7   2   0   10.11    0.24
  -8  -2   0    0.94    0.03
  -8  -2   0    0.82    0.04
   8  -2   0    1.00    0.04
   8   2   0    0.94    0.04
  -8   2   0    0.90    0.05
  -8   2   0    0.87    0.04
   8   2   0    0.93    0.04
  -9  -2   0    9.05    0.21
  -9   2   0    8.48    0.22
   9   2   0    8.88    0.22
  -9   2   0    9.10    0.23
   9   2   0    9.10    0.22
 -10  -2   0   56.00    1.31
  10  -2   0   56.89    1.29
  10   2   0   58.03    1.30
 -10   2   0   56.25    1.32
  11  -2   0   17.84    0.41
 -11  -2   0   17.87    0.43
 -11  -2   0   17.42    0.41
 -11   2   0   17.66    0.42
  11   2   0   17.72    0.41
  11   2   0   16.88    0.41
 -11   2   0   16.81    0.42
  12  -2   0    1.15    0.05
 -12  -2   0    1.15    0.06
 -12  -2   0    1.08    0.04
  12   2   0    1.07    0.05
 -12   2   0    1.05    0.05
  12   2   0    1.09    0.05
 -12   2   0    0.94    0.05
  13  -2   0   29.80    0.69
 -13  -2   0   30.36    0.70
 -13  -2   0   31.00    0.72
 -13   2   0   28.80    0.72
  13   2   0   29.74    0.69
 -13   2   0   30.28    0.71
  13   2   0   30.14    0.70
 -14  -2   0    0.08    0.03
 -14  -2   0    0.07    0.02
  14  -2   0    0.08    0.03
  14   2   0    0.07    0.02
 -14   2   0    0.03    0.03
 -14   2   0    0.05    0.03
  14   2   0    0.12    0.03
 -15  -2   0    0.10    0.02
 -15  -2   0    0.09    0.03
  15  -2   0    0.06    0.03
 -15   2   0    0.09    0.03
 -15   2   0    0.09    0.03
  15   2   0    0.07    0.03
  15   2   0    0.11    0.03
 -16  -2   0    7.44    0.21
 -16  -2   0    8.17    0.20
  16  -2   0    7.79    0.20
 -16   2   0    7.78    0.21
  16   2   0    7.91    0.21
  16   2   0    8.12    0.20
 -16   2   0    8.03    0.21
  17  -2   0    0.03    0.03
 -17  -2   0    0.03    0.02
 -17  -2   0    0.03    0.03
  17   2   0    0.01    0.03
 -17   2   0    0.00    0.03
  17   2   0    0.03    0.03
 -17   2   0   -0.01    0.03
  18  -2   0    0.06    0.03
 -18  -2   0    0.01    0.03
 -18   2   0    0.09    0.03
 -18   2   0    0.09    0.04
  18   2   0    0.06    0.03
  18   2   0    0.10    0.03
  19  -2   0   37.68    0.88
 -19  -2   0   37.39    0.91
 -19   2   0   37.99    0.91
 -19   2   0   38.82    0.90
  19   2   0   37.68    0.88
  20  -2   0    2.36    0.09
 -20  -2   0    2.49    0.10
  20   2   0    2.37    0.09
 -20   2   0    2.34    0.10
 -20   2   0    2.44    0.10
 -21  -2   0    7.24    0.21
  21  -2   0    7.58    0.20
 -21   2   0    7.56    0.21
 -21   2   0    7.02    0.21
  21   2   0    7.43    0.20
  22  -2   0    0.21    0.04
 -22  -2   0    0.33    0.05
  22   2   0    0.28    0.05
 -22   2   0    0.23    0.05
 -22   2   0    0.23    0.05
  23  -2   0    3.10    0.11
 -23  -2   0    3.14    0.12
 -23   2   0    2.83    0.11
 -23   2   0    3.16    0.12
  23   2   0    3.16    0.12
  24  -2   0    0.68    0.06
 -24  -2   0    0.85    0.07
  24   2   0    0.67    0.06
 -24   2   0    0.78    0.07
 -24   2   0    0.65    0.07
 -25  -2   0    2.69    0.12
  25  -2   0    2.84    0.11
 -25   2   0    2.86    0.11
 -25   2   0    2.56    0.11
  25   2   0    2.74    0.11
  26  -2   0    4.06    0.14
 -26  -2   0    4.26    0.15
 -26   2   0    4.04    0.15
  26   2   0    4.03    0.14
  27  -2   0    4.36    0.15
 -27  -2   0    4.48    0.16
 -27   2   0    4.62    0.16
  27   2   0    4.34    0.16
 -28  -2   0    0.49    0.07
  28  -2   0    0.44    0.06
 -28   2   0    0.40    0.06
  28   2   0    0.52    0.07
  29  -2   0    1.57    0.09
 -29  -2   0    1.75    0.11
  29   2   0    1.90    0.10
 -29   2   0    1.68    0.10
 -30  -2   0    0.35    0.07
  30  -2   0    0.30    0.06
  30   2   0    0.33    0.06
 -30   2   0    0.33    0.07
  31  -2   0    4.76    0.17
 -31  -2   0    4.62    0.18
  31   2   0    4.68    0.17
 -31   2   0    4.39    0.17
   0   3   0   -0.04    0.02
   0   3   0    0.02    0.02
   0   3   0    0.02    0.02
   0   3   0   -0.07    0.02
  -1   3   0    7.85    0.19
   1   3   0    7.87    0.19
   1   3   0    7.44    0.18
  -1   3   0    7.75    0.18
  -1   3   0    7.83    0.18
   1   3   0    7.11    0.18
  -1   3   0    7.52    0.19
  -2  -3   0    0.02    0.02
  -2   3   0    0.04    0.02
   2   3   0    0.06    0.02
  -2   3   0    0.03    0.02
  -2   3   0    0.05    0.02
   2   3   0    0.05    0.02
   2   3   0    0.03    0.01
  -2   3   0    0.01    0.02
  -3  -3   0    6.45    0.17
   3   3   0    6.49    0.16
   3   3   0    6.96    0.17
  -3   3   0    6.99    0.16
  -3   3   0    6.70    0.17
  -3   3   0    6.21    0.17
   4  -3   0    8.99    0.21
  -4  -3   0    8.92    0.21
  -4  -3   0    9.16    0.22
   4   3   0    9.26    0.21
  -4   3   0    8.41    0.22
  -4   3   0    8.67    0.22
  -4   3   0    9.25    0.21
   4   3   0    8.93    0.22
   5  -3   0    2.10    0.06
  -5  -3   0    1.92    0.06
   5   3   0    2.22    0.07
   5   3   0    2.07    0.06
  -5   3   0    2.05    0.07
  -5   3   0    2.16    0.06
  -5   3   0    1.94    0.06
   6  -3   0    1.19    0.04
  -6  -3   0    1.06    0.04
  -6   3   0    1.14    0.05
   6   3   0    1.11    0.05
   6   3   0    1.02    0.04
  -6   3   0    1.02    0.05
   7  -3   0    6.10    0.15
  -7  -3   0    6.15    0.16
   7  -3   0    6.07    0.15
   7   3   0    6.55    0.16
  -7   3   0    6.54    0.16
  -7   3   0    6.03    0.16
   7   3   0    6.11    0.16
  -8  -3   0    1.50    0.06
   8  -3   0    1.59    0.05
   8   3   0    1.53    0.06
  -8   3   0    1.46    0.06
  -8   3   0    1.62    0.06
   8   3   0    1.50    0.05
  -9  -3   0    0.29    0.03
   9  -3   0    0.22    0.02
  -9   3   0    0.19    0.03
   9   3   0    0.24    0.03
   9   3   0    0.23    0.02
  -9   3   0    0.22    0.03
 -10  -3   0    0.03    0.02
  10  -3   0    0.05    0.02
 -10   3   0    0.01    0.02
 -10   3   0   -0.01    0.03
  10   3   0    0.03    0.02
  10   3   0    0.06    0.02
  11  -3   0    0.10    0.02
 -11  -3   0    0.10    0.03
 -11  -3   0    0.12    0.01
  11   3   0    0.16    0.03
  11   3   0    0.05    0.03
 -11   3   0    0.06    0.03
 -11   3   0    0.13    0.03
 -12  -3   0   20.41    0.48
  12  -3   0   19.45    0.46
 -12  -3   0   19.74    0.46
 -12   3   0   18.97    0.48
  12   3   0   19.71    0.46
 -12   3   0   19.90    0.48
  12   3   0   19.75    0.47
 -13  -3   0   12.25    0.31
 -13  -3   0   12.19    0.29
  13  -3   0   12.81    0.30
 -13   3   0   12.42    0.31
  13   3   0   12.69    0.30
 -13   3   0   11.97    0.31
  13   3   0   12.19    0.30
 -14  -3   0    1.52    0.05
  14  -3   0    1.47    0.06
 -14  -3   0    1.39    0.06
  14   3   0    1.52    0.06
 -14   3   0    1.58    0.07
 -14   3   0    1.49    0.07
  14   3   0    1.41    0.06
  15  -3   0    0.88    0.05
 -15  -3   0    0.82    0.05
 -15   3   0    0.86    0.06
  15   3   0    0.83    0.05
  15   3   0    0.91    0.05
 -15   3   0    0.82    0.06
  16  -3   0    0.27    0.03
 -16  -3   0    0.21    0.04
 -16   3   0    0.17    0.03
 -16   3   0    0.20    0.04
  16   3   0    0.19    0.03
  16   3   0    0.24    0.04
  17  -3   0   -0.01    0.03
 -17  -3   0    0.03    0.03
 -17   3   0    0.00    0.03
 -17   3   0   -0.02    0.03
  17   3   0    0.00    0.03
  17   3   0    0.05    0.03
  18  -3   0   -0.02    0.03
 -18  -3   0   -0.01    0.03
 -18   3   0   -0.03    0.03
 -18   3   0    0.00    0.03
  18   3   0   -0.02    0.03
  18   3   0   -0.03    0.03
  19  -3   0    4.30    0.13
 -19  -3   0    4.20    0.14
 -19   3   0    3.67    0.13
 -19   3   0    3.94    0.13
  19   3   0    3.94    0.13
  19   3   0    4.02    0.12
 -20  -3   0    2.15    0.10
  20  -3   0    1.87    0.08
 -20   3   0    1.94    0.09
 -20   3   0    1.81    0.09
  20   3   0    2.00    0.09
 -21  -3   0    0.58    0.06
  21  -3   0    0.70    0.06
 -21   3   0    0.59    0.06
 -21   3   0    0.63    0.06
  21   3   0    0.59    0.05
 -22  -3   0    1.73    0.09
  22  -3   0    1.82    0.08
 -22   3   0    1.76    0.09
  22   3   0    1.78    0.09
 -22   3   0    1.51    0.08
  23  -3   0    2.54    0.10
 -23  -3   0    2.40    0.10
  23   3   0    2.33    0.10
 -23   3   0    2.18    0.10
 -23   3   0    2.36    0.11
 -24  -3   0    0.25    0.05
  24  -3   0    0.26    0.05
 -24   3   0    0.28    0.05
  24   3   0    0.26    0.05
 -24   3   0    0.28    0.05
  25  -3   0    0.19    0.05
 -25  -3   0    0.14    0.05
 -25   3   0    0.18    0.05
 -25   3   0    0.21    0.05
  25   3   0    0.18    0.05
 -26  -3   0    0.91    0.08
  26  -3   0    0.97    0.08
  26   3   0    0.78    0.07
 -26   3   0    0.72    0.07
 -26   3   0    0.85    0.08
 -27  -3   0    0.36    0.06
  27  -3   0    0.31    0.05
  27   3   0    0.36    0.06
 -27   3   0    0.34    0.06
  28  -3   0    1.67    0.10
 -28  -3   0    1.55    0.10
 -28   3   0    1.49    0.09
  28   3   0    1.72    0.10
  29  -3   0    9.93    0.28
 -29  -3   0   10.29    0.29
  29   3   0    9.85    0.28
 -29   3   0    9.86    0.29
  30  -3   0    0.27    0.06
 -30  -3   0    0.31    0.07
  30   3   0    0.33    0.06
 -30   3   0    0.33    0.06
  31  -3   0    0.00    0.06
 -31   3   0    0.05    0.06
   0   4   0  371.82    9.93
   0   4   0  360.94    9.26
   0   4   0  381.06    8.37
   0   4   0  364.69    8.45
   1   4   0   51.18    1.18
  -1   4   0   49.89    1.16
   1   4   0   50.23    1.16
   1   4   0   51.41    1.16
  -1   4   0   50.27    1.19
  -1   4   0   50.49    1.18
  -1   4   0   51.45    1.15
  -2  -4   0  120.49    2.89
   2   4   0  123.38    3.06
   2   4   0  121.94    2.78
  -2   4   0  118.72    2.89
   2   4   0  123.29    2.82
  -2   4   0  122.09    2.85
  -2   4   0  121.78    2.79
  -2   4   0  123.19    2.80
  -3  -4   0  187.43    4.47
   3   4   0  186.94    4.36
   3   4   0  189.10    4.32
  -3   4   0  184.77    4.38
   3   4   0  188.68    4.36
  -3   4   0  188.75    4.46
  -3   4   0  189.12    4.31
  -3   4   0  199.54    4.34
   4  -4   0   24.72    0.58
  -4  -4   0   25.94    0.58
  -4  -4   0   24.92    0.60
   4   4   0   25.42    0.58
  -4   4   0   24.76    0.60
   4   4   0   25.01    0.59
  -4   4   0   26.01    0.60
  -4   4   0   25.84    0.58
  -5  -4   0    6.19    0.16
  -5  -4   0    6.12    0.14
   5  -4   0    5.92    0.15
   5   4   0    6.14    0.16
  -5   4   0    5.95    0.16
  -5   4   0    6.21    0.16
  -5   4   0    6.33    0.15
   5   4   0    6.26    0.16
   6  -4   0    4.72    0.12
  -6  -4   0    4.84    0.13
  -6   4   0    4.60    0.13
  -6   4   0    4.60    0.13
   6   4   0    4.86    0.13
   6   4   0    4.80    0.13
  -6   4   0    4.81    0.12
   7  -4   0    0.63    0.04
  -7  -4   0    0.62    0.04
   7   4   0    0.64    0.05
  -7   4   0    0.55    0.04
   7   4   0    0.67    0.04
  -7   4   0    0.65    0.04
  -8  -4   0    5.14    0.14
   8  -4   0    5.13    0.13
   8  -4   0    5.01    0.12
   8   4   0    5.41    0.14
   8   4   0    5.21    0.14
  -8   4   0    5.25    0.14
  -8   4   0    5.24    0.14
   9  -4   0   26.15    0.60
  -9  -4   0   25.85    0.63
   9  -4   0   26.65    0.61
   9   4   0   26.62    0.61
  -9   4   0   25.18    0.62
  -9   4   0   26.88    0.63
   9   4   0   26.31    0.62
 -10  -4   0   25.96    0.62
  10  -4   0   25.53    0.59
 -10   4   0   25.78    0.62
 -10   4   0   25.00    0.61
  10   4   0   25.78    0.60
  10   4   0   26.07    0.60
  11  -4   0    0.84    0.05
 -11  -4   0    0.89    0.05
  11   4   0    0.85    0.05
 -11   4   0    0.84    0.05
 -11   4   0    0.73    0.05
  11   4   0    0.89    0.05
  12  -4   0    9.13    0.23
 -12  -4   0    9.12    0.24
  12   4   0    9.26    0.23
 -12   4   0    9.26    0.24
 -12   4   0    8.78    0.24
  12   4   0    8.86    0.23
  13  -4   0    1.32    0.06
 -13  -4   0    1.44    0.07
 -13   4   0    1.36    0.07
 -13   4   0    1.35    0.06
  13   4   0    1.33    0.06
  13   4   0    1.35    0.06
  14  -4   0    4.29    0.12
 -14  -4   0    4.27    0.13
 -14   4   0    4.48    0.13
  14   4   0    4.30    0.13
 -14   4   0    4.49    0.13
  14   4   0    4.32    0.13
 -15  -4   0    5.51    0.16
  15  -4   0    5.79    0.16
 -15   4   0    5.82    0.16
  15   4   0    5.72    0.16
 -15   4   0    5.66    0.17
  15   4   0    5.81    0.16
 -16  -4   0   14.31    0.37
  16  -4   0   15.37    0.36
 -16   4   0   15.15    0.38
  16   4   0   15.18    0.36
  16   4   0   14.79    0.36
 -16   4   0   14.00    0.37
  17  -4   0    1.33    0.07
 -17  -4   0    1.33    0.07
 -17   4   0    1.37    0.07
  17   4   0    1.45    0.07
 -17   4   0    1.27    0.07
  17   4   0    1.39    0.07
  18  -4   0   12.05    0.30
 -18  -4   0   12.41    0.31
  18   4   0   12.21    0.30
 -18   4   0   11.54    0.31
  18   4   0   11.89    0.30
 -18   4   0   11.51    0.31
  19  -4   0   10.13    0.26
 -19  -4   0   10.03    0.27
  19   4   0   10.05    0.26
 -19   4   0    9.92    0.27
 -19   4   0    9.90    0.27
  19   4   0   10.03    0.26
 -20  -4   0    0.00    0.04
  20  -4   0    0.02    0.03
  20   4   0   -0.04    0.04
 -20   4   0    0.05    0.04
 -20   4   0    0.03    0.04
  20   4   0   -0.01    0.04
 -21  -4   0    0.37    0.05
  21  -4   0    0.40    0.05
  21   4   0    0.49    0.05
 -21   4   0    0.49    0.06
 -21   4   0    0.38    0.05
 -22  -4   0    1.53    0.09
  22  -4   0    1.63    0.08
  22   4   0    1.54    0.09
 -22   4   0    1.71    0.09
 -22   4   0    1.61    0.09
 -23  -4   0    4.93    0.16
  23  -4   0    4.90    0.15
 -23   4   0    4.74    0.16
 -23   4   0    4.88    0.16
  23   4   0    4.69    0.15
 -24  -4   0    1.84    0.09
  24  -4   0    1.80    0.09
  24   4   0    1.99    0.10
 -24   4   0    2.16    0.10
 -24   4   0    1.97    0.10
  25  -4   0    0.62    0.06
 -25  -4   0    0.45    0.06
 -25   4   0    0.50    0.06
  25   4   0    0.61    0.06
 -25   4   0    0.68    0.07
  26  -4   0    0.04    0.04
 -26  -4   0   -0.01    0.05
 -26   4   0    0.06    0.05
  26   4   0   -0.01    0.05
 -26   4   0    0.00    0.05
  27  -4   0    0.18    0.05
 -27  -4   0    0.14    0.06
 -27   4   0    0.17    0.06
  27   4   0    0.20    0.05
 -27   4   0    0.21    0.06
  28  -4   0    1.09    0.08
 -28  -4   0    1.13    0.09
  28   4   0    1.15    0.08
 -28   4   0    0.97    0.08
 -28   4   0    1.11    0.09
 -29  -4   0    0.18    0.06
  29  -4   0    0.19    0.06
  29   4   0    0.31    0.06
 -29   4   0    0.20    0.06
  30  -4   0    3.49    0.14
 -30  -4   0    3.53    0.15
 -30   4   0    3.53    0.15
  30   4   0    3.50    0.14
 -31   4   0    2.65    0.13
   0   5   0    0.02    0.02
   0   5   0    0.02    0.02
   0   5   0    0.00    0.02
   0   5   0    0.02    0.02
  -1   5   0    0.08    0.02
   1   5   0    0.03    0.02
   1   5   0    0.04    0.02
  -1   5   0    0.06    0.02
  -1   5   0    0.00    0.02
  -1   5   0    0.03    0.02
   1   5   0    0.05    0.02
  -2  -5   0    0.47    0.04
   2   5   0    0.36    0.03
  -2   5   0    0.41    0.04
  -2   5   0    0.42    0.03
  -2   5   0    0.42    0.04
  -2   5   0    0.39    0.03
   2   5   0    0.36    0.03
   2   5   0    0.47    0.04
  -3  -5   0    1.17    0.05
  -3   5   0    1.13    0.05
  -3   5   0    1.10    0.05
   3   5   0    1.13    0.04
   3   5   0    1.10    0.05
   3   5   0    1.22    0.05
  -3   5   0    1.11    0.05
  -3   5   0    1.09    0.05
  -4  -5   0    2.56    0.08
  -4   5   0    2.66    0.08
  -4   5   0    2.59    0.08
  -4   5   0    2.49    0.08
  -4   5   0    2.48    0.08
   4   5   0    2.37    0.08
   4   5   0    2.63    0.08
  -5  -5   0    0.09    0.01
  -5  -5   0    0.09    0.02
   5  -5   0    0.07    0.02
   5   5   0    0.09    0.03
  -5   5   0    0.08    0.02
  -5   5   0    0.05    0.02
   5   5   0    0.09    0.02
  -5   5   0    0.10    0.02
  -6  -5   0    0.97    0.03
   6  -5   0    0.92    0.04
  -6  -5   0    0.95    0.05
   6   5   0    0.91    0.05
   6   5   0    1.00    0.06
  -6   5   0    1.03    0.04
  -6   5   0    0.86    0.05
  -6   5   0    0.93    0.05
   7  -5   0    0.57    0.04
  -7  -5   0    0.52    0.04
   7   5   0    0.50    0.04
  -7   5   0    0.44    0.04
   7   5   0    0.53    0.04
  -7   5   0    0.52    0.04
  -7   5   0    0.49    0.03
   8  -5   0    0.84    0.04
  -8  -5   0    0.91    0.05
  -8   5   0    0.82    0.05
  -8   5   0    0.68    0.05
   8   5   0    0.83    0.05
   8   5   0    0.76    0.05
   9  -5   0    0.00    0.02
   9  -5   0   -0.01    0.01
  -9  -5   0    0.01    0.02
  -9   5   0   -0.03    0.03
   9   5   0   -0.04    0.03
   9   5   0    0.01    0.02
  -9   5   0   -0.01    0.02
 -10  -5   0    0.07    0.03
  10  -5   0    0.09    0.02
  10  -5   0    0.08    0.01
  10   5   0    0.01    0.03
 -10   5   0    0.01    0.03
 -10   5   0    0.06    0.03
  10   5   0    0.08    0.03
  11  -5   0    0.79    0.05
  11  -5   0    0.62    0.03
 -11  -5   0    0.79    0.05
  11   5   0    0.66    0.05
 -11   5   0    0.66    0.05
  11   5   0    0.81    0.05
 -11   5   0    0.85    0.05
 -12  -5   0    8.31    0.22
  12  -5   0    8.16    0.21
  12   5   0    8.37    0.22
 -12   5   0    8.46    0.22
 -12   5   0    8.40    0.22
  12   5   0    8.19    0.22
  13  -5   0    4.24    0.12
 -13  -5   0    4.57    0.13
 -13   5   0    4.39    0.13
  13   5   0    4.47    0.13
 -13   5   0    4.26    0.13
  13   5   0    4.46    0.13
  14  -5   0    0.17    0.03
 -14  -5   0    0.23    0.04
 -14   5   0    0.17    0.04
  14   5   0    0.21    0.04
 -14   5   0    0.16    0.03
  14   5   0    0.20    0.04
  15  -5   0    1.06    0.06
 -15  -5   0    1.06    0.06
 -15   5   0    0.92    0.07
 -15   5   0    1.10    0.06
  15   5   0    1.04    0.06
  15   5   0    0.94    0.06
 -16  -5   0    0.70    0.06
  16  -5   0    0.64    0.05
  16   5   0    0.55    0.05
 -16   5   0    0.64    0.05
 -16   5   0    0.57    0.05
  16   5   0    0.61    0.05
  17  -5   0    1.25    0.07
 -17  -5   0    1.09    0.07
  17   5   0    1.12    0.07
  17   5   0    1.11    0.07
 -17   5   0    1.08    0.08
 -17   5   0    1.19    0.07
  18  -5   0    0.27    0.04
 -18  -5   0    0.26    0.04
 -18   5   0    0.27    0.04
  18   5   0    0.29    0.04
  18   5   0    0.26    0.04
 -18   5   0    0.26    0.05
 -19  -5   0    0.82    0.07
  19  -5   0    0.83    0.06
 -19   5   0    0.71    0.06
 -19   5   0    0.74    0.06
  19   5   0    0.71    0.06
  19   5   0    0.79    0.06
 -20  -5   0    1.34    0.08
  20  -5   0    1.44    0.08
 -20   5   0    1.38    0.09
  20   5   0    1.37    0.08
  20   5   0    1.34    0.07
 -20   5   0    1.41    0.08
 -21  -5   0    0.11    0.05
  21  -5   0    0.04    0.04
 -21   5   0    0.02    0.05
  21   5   0    0.04    0.04
  21   5   0    0.07    0.04
 -21   5   0    0.07    0.04
 -22  -5   0    1.46    0.09
  22  -5   0    1.50    0.08
 -22   5   0    1.55    0.09
  22   5   0    1.44    0.08
 -22   5   0    1.33    0.08
  23  -5   0    0.15    0.05
 -23  -5   0    0.13    0.05
 -23   5   0    0.14    0.05
 -23   5   0    0.06    0.05
  23   5   0    0.08    0.05
  24  -5   0    0.12    0.04
 -24  -5   0    0.10    0.05
 -24   5   0    0.20    0.05
 -24   5   0    0.14    0.05
  24   5   0    0.16    0.05
  25  -5   0    1.13    0.08
 -25  -5   0    1.12    0.09
 -25   5   0    1.20    0.09
  25   5   0    1.20    0.08
 -25   5   0    1.34    0.09
  26  -5   0    0.15    0.05
 -26  -5   0    0.20    0.06
 -26   5   0    0.13    0.05
 -26   5   0    0.14    0.05
  26   5   0    0.08    0.05
 -27  -5   0    0.00    0.06
  27  -5   0    0.02    0.05
 -27   5   0    0.12    0.05
  27   5   0    0.05    0.05
 -27   5   0    0.04    0.05
 -28  -5   0    2.21    0.12
  28  -5   0    2.49    0.12
 -28   5   0    2.60    0.13
  28   5   0    2.53    0.12
 -28   5   0    2.46    0.12
  29  -5   0    1.07    0.09
 -29  -5   0    1.05    0.09
  29   5   0    1.03    0.09
 -29   5   0    1.10    0.10
 -29   5   0    1.12    0.09
  30  -5   0    0.05    0.05
 -30   5   0    0.05    0.06
  30   5   0    0.12    0.06
   0   6   0    2.41    0.08
   0   6   0    2.56    0.08
   0   6   0    2.69    0.08
   0   6   0    2.55    0.08
  -1   6   0    7.61    0.19
   1   6   0    7.27    0.19
   1   6   0    7.33    0.19
  -1   6   0    7.36    0.19
  -1   6   0    7.36    0.19
   1   6   0    7.40    0.19
  -1   6   0    7.59    0.19
  -2  -6   0   10.96    0.27
  -2   6   0   10.68    0.27
  -2   6   0   10.39    0.27
   2   6   0   10.63    0.26
   2   6   0   10.55    0.27
   2   6   0   10.94    0.26
  -2   6   0   10.93    0.26
  -2   6   0   10.81    0.26
  -3  -6   0   23.19    0.55
   3   6   0   22.66    0.54
   3   6   0   22.64    0.54
  -3   6   0   22.80    0.55
  -3   6   0   22.76    0.54
  -3   6   0   22.92    0.55
  -3   6   0   23.36    0.54
   3   6   0   23.07    0.54
  -4  -6   0    0.52    0.04
   4   6   0    0.53    0.04
  -4   6   0    0.55    0.04
  -4   6   0    0.60    0.04
   4   6   0    0.54    0.05
  -4   6   0    0.64    0.04
  -4   6   0    0.62    0.04
  -5  -6   0    0.61    0.04
   5  -6   0    0.56    0.04
  -5  -6   0    0.59    0.03
  -5   6   0    0.60    0.04
  -5   6   0    0.60    0.04
   5   6   0    0.58    0.05
   5   6   0    0.57    0.04
  -5   6   0    0.57    0.05
  -6  -6   0    6.72    0.16
   6  -6   0    6.43    0.17
  -6  -6   0    6.37    0.18
   6   6   0    6.59    0.17
  -6   6   0    6.55    0.18
  -6   6   0    6.73    0.17
  -6   6   0    6.62    0.18
   6   6   0    6.60    0.18
   7  -6   0   10.48    0.26
  -7  -6   0   11.07    0.25
  -7  -6   0   10.26    0.27
   7   6   0   10.90    0.27
  -7   6   0   10.96    0.26
  -7   6   0   10.90    0.27
   7   6   0   10.42    0.27
  -7   6   0   10.58    0.27
  -8  -6   0    0.05    0.03
   8  -6   0    0.06    0.02
   8   6   0    0.03    0.02
  -8   6   0    0.03    0.03
   8   6   0   -0.03    0.03
  -8   6   0    0.02    0.02
  -8   6   0    0.03    0.02
  -9  -6   0    1.24    0.06
   9  -6   0    1.31    0.05
   9  -6   0    1.34    0.06
   9   6   0    1.25    0.06
   9   6   0    1.40    0.06
  -9   6   0    1.33    0.07
  -9   6   0    1.35    0.06
  10  -6   0   13.49    0.32
  10  -6   0   13.16    0.31
 -10  -6   0   14.01    0.34
  10   6   0   13.44    0.33
 -10   6   0   13.30    0.34
 -10   6   0   13.47    0.34
  10   6   0   13.19    0.33
  11  -6   0    0.61    0.04
 -11  -6   0    0.55    0.05
  11   6   0    0.54    0.05
 -11   6   0    0.55    0.05
  11   6   0    0.58    0.05
 -11   6   0    0.61    0.05
  12  -6   0   11.58    0.29
 -12  -6   0   11.56    0.30
 -12   6   0   11.79    0.30
 -12   6   0   11.81    0.30
  12   6   0   11.68    0.29
  12   6   0   11.79    0.30
  13  -6   0   -0.02    0.02
 -13  -6   0    0.01    0.03
  13   6   0   -0.02    0.03
 -13   6   0    0.04    0.04
  13   6   0    0.00    0.03
 -13   6   0   -0.01    0.03
  14  -6   0   10.89    0.27
 -14  -6   0   10.47    0.28
  14   6   0   10.50    0.27
 -14   6   0   11.00    0.28
 -14   6   0   10.44    0.29
  14   6   0   10.83    0.28
  15  -6   0    0.40    0.04
 -15  -6   0    0.43    0.05
  15   6   0    0.41    0.05
 -15   6   0    0.44    0.04
 -15   6   0    0.44    0.05
  15   6   0    0.46    0.04
 -16  -6   0    0.39    0.05
  16  -6   0    0.37    0.04
  16   6   0    0.39    0.05
 -16   6   0    0.51    0.05
  16   6   0    0.51    0.05
 -16   6   0    0.38    0.05
 -17  -6   0    1.96    0.09
  17  -6   0    2.02    0.08
  17   6   0    2.00    0.09
 -17   6   0    2.14    0.09
 -17   6   0    1.88    0.10
  17   6   0    1.96    0.08
  18  -6   0    2.57    0.10
 -18  -6   0    2.55    0.10
  18   6   0    2.32    0.10
 -18   6   0    2.44    0.10
 -18   6   0    2.49    0.11
  18   6   0    2.33    0.10
 -19  -6   0    6.85    0.20
  19  -6   0    6.96    0.19
  19   6   0    7.02    0.20
  19   6   0    6.56    0.20
 -19   6   0    7.00    0.20
 -19   6   0    6.64    0.21
  20  -6   0    0.46    0.05
 -20  -6   0    0.45    0.06
 -20   6   0    0.35    0.06
  20   6   0    0.37    0.05
 -20   6   0    0.45    0.06
  20   6   0    0.41    0.05
 -21  -6   0    1.18    0.08
  21  -6   0    1.09    0.07
 -21   6   0    1.08    0.08
  21   6   0    1.12    0.08
  21   6   0    1.07    0.07
 -21   6   0    1.06    0.08
  22  -6   0    0.06    0.04
 -22  -6   0    0.05    0.05
 -22   6   0    0.08    0.05
  22   6   0    0.03    0.04
  22   6   0    0.06    0.04
 -22   6   0    0.05    0.05
  23  -6   0    1.70    0.09
 -23  -6   0    1.82    0.10
 -23   6   0    1.91    0.10
  23   6   0    1.73    0.09
 -23   6   0    1.79    0.10
  24  -6   0    0.78    0.07
 -24  -6   0    0.71    0.07
  24   6   0    0.64    0.07
 -24   6   0    0.56    0.06
 -24   6   0    0.79    0.08
 -25  -6   0    5.51    0.18
  25  -6   0    5.52    0.18
 -25   6   0    5.63    0.19
 -25   6   0    5.64    0.19
  25   6   0    5.39    0.18
 -26  -6   0    1.29    0.09
  26  -6   0    1.45    0.09
 -26   6   0    1.30    0.10
  26   6   0    1.20    0.09
 -26   6   0    1.25    0.09
 -27  -6   0    1.19    0.09
  27  -6   0    1.27    0.09
 -27   6   0    1.18    0.09
  27   6   0    1.25    0.09
 -27   6   0    1.12    0.10
 -28  -6   0    3.99    0.16
  28  -6   0    4.01    0.15
 -28   6   0    4.20    0.17
 -28   6   0    4.00    0.16
  28   6   0    4.08    0.15
 -29  -6   0    5.99    0.21
  29  -6   0    5.86    0.19
 -29   6   0    6.31    0.21
 -29   6   0    5.97    0.21
  29   6   0    5.87    0.20
 -30   6   0    0.09    0.06
  -1  -7   0    0.01    0.02
   1   7   0    0.00    0.02
  -1   7   0    0.02    0.02
  -1   7   0    0.07    0.02
   1   7   0   -0.02    0.03
   1   7   0   -0.01    0.02
  -1   7   0    0.02    0.03
  -1   7   0   -0.04    0.03
  -2  -7   0    3.76    0.11
  -2   7   0    3.58    0.11
   2   7   0    3.58    0.11
  -2   7   0    3.56    0.11
  -2   7   0    3.69    0.11
  -2   7   0    3.66    0.11
   2   7   0    3.54    0.10
   2   7   0    3.54    0.11
  -3  -7   0    0.02    0.03
  -3   7   0    0.01    0.03
   3   7   0   -0.03    0.03
   3   7   0   -0.01    0.02
  -3   7   0   -0.04    0.02
  -3   7   0   -0.05    0.02
  -3   7   0   -0.03    0.02
   3   7   0   -0.06    0.02
  -4  -7   0    5.19    0.15
  -4  -7   0    5.18    0.13
  -4   7   0    5.35    0.14
  -4   7   0    5.16    0.14
   4   7   0    5.09    0.14
  -4   7   0    4.91    0.15
   4   7   0    4.93    0.14
  -4   7   0    5.12    0.15
  -5  -7   0    0.99    0.04
  -5  -7   0    0.97    0.05
  -5   7   0    0.98    0.06
  -5   7   0    1.00    0.05
   5   7   0    1.05    0.06
  -5   7   0    1.05    0.06
   5   7   0    0.98    0.06
  -6  -7   0    2.26    0.08
  -6  -7   0    2.36    0.07
   6  -7   0    2.47    0.08
  -6   7   0    2.22    0.08
   6   7   0    2.20    0.08
   6   7   0    2.30    0.08
  -6   7   0    2.34    0.08
  -6   7   0    2.43    0.08
   7  -7   0    0.73    0.05
  -7  -7   0    0.75    0.05
  -7   7   0    0.90    0.05
   7   7   0    0.85    0.05
  -7   7   0    0.70    0.05
  -7   7   0    0.77    0.04
   7   7   0    0.78    0.06
   8  -7   0    1.71    0.07
  -8  -7   0    1.76    0.07
   8   7   0    1.73    0.07
  -8   7   0    1.67    0.06
  -8   7   0    1.66    0.07
  -8   7   0    1.57    0.07
   8   7   0    1.70    0.07
   9  -7   0    1.21    0.06
  -9  -7   0    1.12    0.06
  -9   7   0    1.16    0.06
   9   7   0    1.20    0.06
   9   7   0    1.17    0.07
  -9   7   0    1.18    0.06
 -10  -7   0    2.30    0.09
  10  -7   0    2.20    0.08
 -10   7   0    2.41    0.09
  10   7   0    2.30    0.09
 -10   7   0    2.24    0.09
  10   7   0    2.22    0.09
 -11  -7   0    0.31    0.04
  11  -7   0    0.29    0.03
 -11   7   0    0.28    0.04
  11   7   0    0.30    0.04
 -11   7   0    0.27    0.04
  11   7   0    0.26    0.04
  12  -7   0    1.66    0.07
 -12  -7   0    1.78    0.08
 -12   7   0    1.62    0.08
  12   7   0    1.62    0.08
  12   7   0    1.61    0.08
 -12   7   0    1.65    0.08
  13  -7   0    1.62    0.07
 -13  -7   0    1.53    0.07
 -13   7   0    1.60    0.08
  13   7   0    1.65    0.08
 -13   7   0    1.28    0.08
  13   7   0    1.57    0.08
  14  -7   0    0.33    0.04
 -14  -7   0    0.26    0.04
  14   7   0    0.24    0.05
 -14   7   0    0.22    0.05
 -14   7   0    0.33    0.04
  14   7   0    0.32    0.04
 -15  -7   0    0.20    0.04
  15  -7   0    0.27    0.04
  15   7   0    0.23    0.04
 -15   7   0    0.27    0.04
 -15   7   0    0.24    0.05
  15   7   0    0.12    0.04
 -16  -7   0    2.97    0.11
  16  -7   0    3.03    0.10
  16   7   0    2.86    0.11
 -16   7   0    3.01    0.11
 -16   7   0    2.92    0.12
  16   7   0    3.14    0.11
 -17  -7   0   -0.03    0.04
  17  -7   0    0.02    0.03
  17   7   0    0.02    0.04
  17   7   0    0.05    0.04
 -17   7   0    0.00    0.04
 -17   7   0    0.04    0.05
  18  -7   0    0.15    0.04
 -18  -7   0    0.06    0.04
  18   7   0    0.10    0.04
 -18   7   0    0.10    0.04
  18   7   0    0.05    0.04
 -18   7   0    0.06    0.05
  19  -7   0    0.32    0.05
 -19  -7   0    0.33    0.05
  19   7   0    0.38    0.05
 -19   7   0    0.42    0.05
  19   7   0    0.31    0.05
 -19   7   0    0.28    0.05
  20  -7   0    0.17    0.05
 -20  -7   0    0.13    0.05
 -20   7   0    0.11    0.05
  20   7   0    0.21    0.05
 -20   7   0    0.14    0.04
  20   7   0    0.11    0.05
 -21  -7   0    0.41    0.06
  21  -7   0    0.36    0.05
  21   7   0    0.49    0.06
 -21   7   0    0.36    0.06
  21   7   0    0.39    0.06
 -21   7   0    0.40    0.06
  22  -7   0    3.25    0.12
 -22  -7   0    3.21    0.13
  22   7   0    3.11    0.13
  22   7   0    3.17    0.13
 -22   7   0    3.23    0.14
 -22   7   0    3.24    0.13
 -23  -7   0   -0.03    0.05
  23  -7   0   -0.06    0.04
  23   7   0    0.00    0.05
 -23   7   0   -0.01    0.05
 -23   7   0    0.04    0.06
  23   7   0    0.01    0.04
 -24  -7   0    0.05    0.06
  24  -7   0    0.07    0.05
 -24   7   0    0.15    0.06
  24   7   0    0.11    0.05
 -24   7   0    0.08    0.05
 -25  -7   0    0.60    0.07
  25  -7   0    0.50    0.06
 -25   7   0    0.62    0.07
  25   7   0    0.50    0.07
 -25   7   0    0.59    0.07
  26  -7   0    2.50    0.12
 -26  -7   0    2.60    0.12
 -26   7   0    2.59    0.12
 -26   7   0    2.57    0.13
  26   7   0    2.55    0.12
 -27  -7   0    1.64    0.10
  27  -7   0    1.64    0.10
  27   7   0    1.51    0.10
 -27   7   0    1.68    0.11
 -27   7   0    1.69    0.11
 -28  -7   0    2.17    0.12
  28  -7   0    2.39    0.12
 -28   7   0    2.21    0.12
 -28   7   0    2.27    0.13
  28   7   0    2.33    0.12
  29  -7   0    0.03    0.06
 -29   7   0    0.06    0.06
 -29   7   0    0.03    0.06
   0   8   0    1.83    0.07
   0   8   0    1.59    0.07
   0   8   0    1.72    0.08
  -1  -8   0   53.03    1.26
  -1   8   0   53.74    1.24
   1   8   0   53.15    1.23
  -1   8   0   53.97    1.22
  -1   8   0   53.52    1.23
   1   8   0   51.19    1.21
   1   8   0   53.04    1.23
  -1   8   0   52.24    1.26
  -2  -8   0    3.12    0.10
  -2   8   0    3.25    0.10
  -2   8   0    3.34    0.11
   2   8   0    3.25    0.11
   2   8   0    3.35    0.10
  -2   8   0    3.19    0.10
  -2   8   0    3.23    0.11
   2   8   0    3.22    0.10
  -3  -8   0    0.81    0.06
   3   8   0    0.81    0.05
  -3   8   0    0.69    0.05
  -3   8   0    0.95    0.06
  -3   8   0    0.77    0.06
  -3   8   0    0.80    0.05
   3   8   0    0.81    0.05
  -4  -8   0    0.11    0.02
  -4  -8   0    0.17    0.03
  -4   8   0    0.14    0.03
  -4   8   0    0.13    0.04
   4   8   0    0.15    0.03
   4   8   0    0.09    0.04
  -4   8   0    0.14    0.03
  -4   8   0    0.18    0.03
  -5  -8   0    2.64    0.08
  -5  -8   0    2.69    0.09
   5   8   0    2.74    0.10
  -5   8   0    2.62    0.10
  -5   8   0    2.74    0.09
   5   8   0    2.60    0.09
  -5   8   0    2.65    0.10
  -6  -8   0    0.07    0.03
   6  -8   0    0.05    0.03
  -6   8   0    0.07    0.03
  -6   8   0    0.11    0.04
  -6   8   0    0.09    0.03
   6   8   0    0.13    0.04
   6   8   0    0.06    0.03
  -7  -8   0   97.98    2.34
   7  -8   0   98.79    2.26
   7   8   0  100.13    2.27
  -7   8   0  103.56    2.28
   7   8   0  100.40    2.29
  -7   8   0   98.43    2.35
  -7   8   0   98.82    2.31
  -8  -8   0    9.28    0.25
   8  -8   0    9.05    0.23
  -8   8   0    9.20    0.25
   8   8   0    9.35    0.24
  -8   8   0    8.96    0.25
  -8   8   0    9.71    0.23
   8   8   0    9.19    0.24
   9  -8   0   24.89    0.59
  -9  -8   0   25.09    0.61
   9   8   0   25.02    0.60
   9   8   0   24.89    0.59
  -9   8   0   24.72    0.61
  -9   8   0   25.19    0.61
  10  -8   0    3.05    0.10
 -10  -8   0    3.08    0.11
 -10   8   0    3.29    0.11
  10   8   0    3.06    0.11
 -10   8   0    3.13    0.11
  10   8   0    3.10    0.11
 -11  -8   0    0.26    0.04
  11  -8   0    0.24    0.04
 -11   8   0    0.27    0.05
 -11   8   0    0.26    0.04
  11   8   0    0.29    0.04
  11   8   0    0.32    0.05
  12  -8   0    8.56    0.22
 -12  -8   0    8.55    0.24
  12   8   0    8.71    0.24
 -12   8   0    8.57    0.24
 -12   8   0    8.20    0.24
  12   8   0    8.74    0.23
 -13  -8   0   21.37    0.53
  13  -8   0   21.21    0.51
 -13   8   0   21.06    0.53
 -13   8   0   21.26    0.53
  13   8   0   21.80    0.52
  13   8   0   20.98    0.52
  14  -8   0    0.03    0.03
 -14  -8   0    0.04    0.04
  14   8   0    0.02    0.04
  14   8   0   -0.03    0.04
 -14   8   0    0.03    0.04
 -14   8   0    0.00    0.04
  15  -8   0    5.90    0.17
 -15  -8   0    5.98    0.18
  15   8   0    5.94    0.18
  15   8   0    5.81    0.17
 -15   8   0    5.85    0.18
 -15   8   0    5.53    0.18
 -16  -8   0    0.58    0.06
  16  -8   0    0.54    0.05
 -16   8   0    0.56    0.05
 -16   8   0    0.54    0.06
  16   8   0    0.58    0.06
  16   8   0    0.50    0.06
 -17  -8   0    6.69    0.20
  17  -8   0    6.94    0.19
 -17   8   0    6.54    0.21
 -17   8   0    7.06    0.21
  17   8   0    6.84    0.20
  17   8   0    6.78    0.20
  18  -8   0    0.02    0.04
 -18  -8   0    0.04    0.05
  18   8   0    0.11    0.04
 -18   8   0    0.02    0.05
  18   8   0    0.08    0.05
 -18   8   0    0.06    0.04
 -19  -8   0    0.03    0.05
  19  -8   0    0.04    0.04
 -19   8   0    0.07    0.05
 -19   8   0    0.02    0.05
  19   8   0   -0.04    0.05
  19   8   0    0.07    0.04
 -20  -8   0    0.31    0.06
  20  -8   0    0.38    0.05
  20   8   0    0.52    0.06
  20   8   0    0.40    0.06
 -20   8   0    0.38    0.06
 -20   8   0    0.49    0.06
 -21  -8   0    0.07    0.06
  21  -8   0    0.06    0.05
  21   8   0    0.21    0.05
 -21   8   0    0.11    0.05
  21   8   0    0.12    0.05
 -21   8   0    0.23    0.05
 -22  -8   0    4.46    0.16
  22  -8   0    4.74    0.15
  22   8   0    4.80    0.16
 -22   8   0    4.79    0.17
  22   8   0    4.72    0.16
 -22   8   0    4.64    0.17
  23  -8   0    5.41    0.17
 -23  -8   0    5.36    0.18
  23   8   0    5.33    0.18
 -23   8   0    5.47    0.19
  23   8   0    5.42    0.18
 -23   8   0    5.33    0.18
 -24  -8   0    4.50    0.17
  24  -8   0    4.73    0.16
 -24   8   0    4.86    0.18
  24   8   0    4.90    0.17
  24   8   0    4.61    0.16
 -24   8   0    4.90    0.17
 -25  -8   0    1.23    0.10
  25  -8   0    1.14    0.09
 -25   8   0    1.41    0.11
 -25   8   0    1.39    0.10
  25   8   0    1.16    0.09
  26  -8   0    1.63    0.10
 -26  -8   0    1.66    0.11
 -26   8   0    1.66    0.11
 -26   8   0    1.63    0.10
  26   8   0    1.82    0.11
 -27  -8   0    0.77    0.09
  27  -8   0    0.87    0.08
  27   8   0    0.85    0.08
 -27   8   0    0.94    0.09
 -27   8   0    0.73    0.08
  28  -8   0    1.20    0.10
 -28   8   0    1.28    0.10
 -28   8   0    1.40    0.11
   0  -9   0    0.07    0.03
   0   9   0    0.02    0.03
   0   9   0   -0.07    0.03
   0   9   0   -0.01    0.03
  -1  -9   0    1.18    0.06
   1   9   0    1.15    0.06
  -1   9   0    1.12    0.07
  -1   9   0    1.11    0.06
  -1   9   0    1.19    0.07
   1   9   0    1.01    0.07
   1   9   0    1.07    0.06
  -1   9   0    1.03    0.07
  -2  -9   0    0.90    0.06
  -2   9   0    0.95    0.06
  -2   9   0    0.90    0.06
   2   9   0    0.87    0.07
  -2   9   0    0.95    0.06
  -2   9   0    0.96    0.06
   2   9   0    0.93    0.06
  -3  -9   0    0.09    0.03
  -3  -9   0    0.18    0.04
   3   9   0    0.15    0.04
  -3   9   0    0.14    0.04
  -3   9   0    0.15    0.04
   3   9   0    0.10    0.03
  -3   9   0    0.07    0.04
  -3   9   0    0.13    0.04
  -4  -9   0    0.53    0.05
  -4   9   0    0.61    0.06
  -4   9   0    0.60    0.05
  -4   9   0    0.39    0.05
   4   9   0    0.44    0.05
   4   9   0    0.58    0.05
  -4   9   0    0.51    0.05
  -5  -9   0    0.15    0.03
  -5   9   0    0.09    0.03
  -5   9   0    0.00    0.03
  -5   9   0    0.15    0.04
   5   9   0    0.07    0.04
   5   9   0    0.14    0.04
  -5   9   0    0.10    0.04
   6  -9   0    0.41    0.04
  -6  -9   0    0.47    0.05
   6   9   0    0.39    0.05
  -6   9   0    0.48    0.05
  -6   9   0    0.46    0.04
  -6   9   0    0.51    0.05
   6   9   0    0.48    0.04
  -7  -9   0    1.29    0.07
   7  -9   0    1.50    0.07
  -7   9   0    1.42    0.07
   7   9   0    1.35    0.07
   7   9   0    1.52    0.07
  -7   9   0    1.27    0.08
  -7   9   0    1.57    0.07
  -8  -9   0    4.39    0.14
   8  -9   0    4.31    0.13
  -8   9   0    3.97    0.14
  -8   9   0    4.43    0.13
  -8   9   0    4.25    0.14
   8   9   0    4.24    0.14
   8   9   0    4.16    0.13
  -9  -9   0    0.03    0.04
   9  -9   0    0.03    0.03
  -9   9   0    0.03    0.03
   9   9   0    0.00    0.03
  -9   9   0    0.01    0.04
   9   9   0   -0.04    0.04
 -10  -9   0    0.07    0.04
  10  -9   0    0.07    0.03
 -10   9   0    0.07    0.04
  10   9   0    0.08    0.04
  10   9   0    0.00    0.04
 -10   9   0    0.12    0.04
 -11  -9   0   -0.01    0.04
  11  -9   0    0.03    0.03
 -11   9   0   -0.02    0.04
  11   9   0   -0.04    0.04
 -11   9   0   -0.05    0.03
  11   9   0    0.00    0.04
 -12  -9   0    0.96    0.07
  12  -9   0    0.96    0.06
  12   9   0    1.02    0.07
 -12   9   0    0.90    0.07
  12   9   0    0.96    0.07
 -12   9   0    0.96    0.08
  13  -9   0    1.74    0.08
 -13  -9   0    1.69    0.09
 -13   9   0    1.86    0.09
 -13   9   0    1.69    0.09
  13   9   0    1.92    0.09
  13   9   0    1.86    0.09
 -14  -9   0    1.78    0.09
  14  -9   0    2.02    0.09
  14   9   0    2.03    0.09
 -14   9   0    1.80    0.10
  14   9   0    1.96    0.10
 -14   9   0    2.18    0.10
  15  -9   0    0.43    0.05
 -15  -9   0    0.53    0.06
  15   9   0    0.50    0.06
  15   9   0    0.50    0.05
 -15   9   0    0.43    0.05
 -15   9   0    0.39    0.06
 -16  -9   0   -0.02    0.04
  16  -9   0   -0.01    0.04
 -16   9   0   -0.04    0.04
  16   9   0   -0.03    0.04
  16   9   0   -0.05    0.04
 -16   9   0   -0.10    0.04
 -17  -9   0    0.09    0.05
  17  -9   0   -0.02    0.04
  17   9   0    0.00    0.05
 -17   9   0    0.03    0.04
  17   9   0    0.01    0.04
 -17   9   0    0.02    0.05
 -18  -9   0    1.60    0.09
  18  -9   0    1.59    0.08
  18   9   0    1.48    0.09
  18   9   0    1.61    0.09
 -18   9   0    1.53    0.09
 -18   9   0    1.28    0.09
 -19  -9   0    1.02    0.08
  19  -9   0    1.13    0.07
  19   9   0    1.17    0.08
 -19   9   0    1.24    0.08
 -19   9   0    1.06    0.09
  19   9   0    1.06    0.09
 -20  -9   0    0.04    0.05
  20  -9   0   -0.01    0.04
  20   9   0   -0.06    0.05
 -20   9   0   -0.04    0.04
 -20   9   0   -0.07    0.05
  20   9   0    0.00    0.05
 -21  -9   0    2.31    0.12
  21  -9   0    2.58    0.11
 -21   9   0    2.76    0.13
 -21   9   0    2.73    0.12
  21   9   0    2.51    0.12
  21   9   0    2.62    0.12
  22  -9   0    0.20    0.05
 -22  -9   0    0.06    0.05
 -22   9   0    0.19    0.06
  22   9   0    0.29    0.06
  22   9   0    0.09    0.06
 -22   9   0    0.20    0.06
 -23  -9   0    0.09    0.06
  23  -9   0    0.08    0.05
 -23   9   0    0.05    0.05
  23   9   0    0.09    0.05
 -23   9   0    0.06    0.06
  23   9   0    0.10    0.06
 -24  -9   0    1.67    0.10
  24  -9   0    1.78    0.09
  24   9   0    1.88    0.11
 -24   9   0    1.83    0.12
  24   9   0    1.65    0.11
 -24   9   0    1.81    0.11
 -25  -9   0    0.02    0.06
  25  -9   0   -0.03    0.05
 -25   9   0    0.01    0.06
  25   9   0    0.00    0.06
 -25   9   0   -0.01    0.05
 -26  -9   0    1.15    0.10
  26  -9   0    1.17    0.08
 -26   9   0    1.12    0.10
  26   9   0    1.15    0.10
 -26   9   0    1.23    0.10
  27  -9   0    2.88    0.13
 -27   9   0    2.88    0.14
   0 -10   0   19.06    0.49
   0  10   0   19.63    0.48
   0  10   0   18.99    0.47
   0  10   0   19.84    0.47
  -1 -10   0    3.83    0.13
   1  10   0    3.92    0.13
   1  10   0    4.08    0.13
  -1  10   0    4.31    0.13
  -1  10   0    4.07    0.13
  -1  10   0    4.17    0.13
  -2 -10   0   17.32    0.44
  -2  10   0   17.44    0.43
  -2  10   0   17.27    0.44
  -2  10   0   17.89    0.43
   2  10   0   17.42    0.43
  -2  10   0   17.17    0.42
   2  10   0   17.17    0.43
  -3 -10   0   11.36    0.31
  -3  10   0   11.90    0.31
  -3  10   0   11.97    0.30
   3  10   0   11.52    0.30
  -3  10   0   11.69    0.31
   3  10   0   12.12    0.31
  -3  10   0   11.80    0.30
  -4 -10   0    2.14    0.09
   4  10   0    2.18    0.09
  -4  10   0    2.20    0.09
  -4  10   0    2.27    0.09
   4  10   0    2.23    0.09
  -4  10   0    2.12    0.09
  -4  10   0    2.27    0.10
  -5 -10   0    1.05    0.07
  -5  10   0    1.07    0.07
   5  10   0    0.88    0.07
  -5  10   0    1.00    0.07
  -5  10   0    0.94    0.07
   5  10   0    1.03    0.07
   6 -10   0    0.04    0.03
  -6 -10   0   -0.01    0.03
   6  10   0   -0.05    0.03
   6  10   0   -0.05    0.04
  -6  10   0    0.00    0.04
  -6  10   0   -0.03    0.03
  -6  10   0    0.04    0.04
  -7 -10   0    0.05    0.04
   7 -10   0    0.03    0.03
  -7  10   0    0.00    0.03
   7  10   0    0.03    0.04
  -7  10   0   -0.04    0.04
   7  10   0   -0.02    0.04
  -7  10   0    0.02    0.04
   8 -10   0    1.07    0.06
  -8 -10   0    1.04    0.07
   8  10   0    1.12    0.07
   8  10   0    0.92    0.07
  -8  10   0    1.07    0.07
  -8  10   0    0.87    0.07
   9 -10   0    0.86    0.06
  -9 -10   0    0.86    0.07
  -9  10   0    0.82    0.07
   9  10   0    0.78    0.07
  -9  10   0    0.72    0.07
   9  10   0    0.79    0.07
 -10 -10   0    2.54    0.10
  10 -10   0    2.52    0.10
  10  10   0    2.62    0.11
 -10  10   0    2.36    0.11
  10  10   0    2.63    0.11
 -10  10   0    2.67    0.11
  11 -10   0   15.25    0.37
 -11 -10   0   14.76    0.39
 -11  10   0   14.74    0.40
  11  10   0   15.81    0.39
 -11  10   0   15.21    0.40
  11  10   0   15.30    0.39
  12 -10   0    3.08    0.11
 -12 -10   0    2.77    0.11
  12  10   0    3.21    0.12
  12  10   0    2.76    0.11
 -12  10   0    3.08    0.12
 -12  10   0    2.94    0.12
  13 -10   0    8.45    0.23
 -13 -10   0    8.50    0.24
  13  10   0    8.43    0.24
  13  10   0    8.00    0.24
 -13  10   0    8.70    0.25
 -13  10   0    8.85    0.24
 -14 -10   0    0.03    0.04
  14 -10   0    0.09    0.04
 -14  10   0    0.01    0.05
  14  10   0    0.00    0.05
  14  10   0    0.07    0.05
 -14  10   0    0.06    0.05
 -15 -10   0    1.18    0.08
  15 -10   0    1.07    0.07
  15  10   0    1.00    0.08
 -15  10   0    0.98    0.08
  15  10   0    1.15    0.08
 -15  10   0    1.08    0.09
  16 -10   0    1.83    0.09
 -16 -10   0    1.72    0.09
  16  10   0    1.75    0.10
  16  10   0    1.75    0.09
 -16  10   0    1.81    0.11
 -16  10   0    1.78    0.10
 -17 -10   0    5.38    0.18
  17 -10   0    5.99    0.17
 -17  10   0    5.63    0.19
 -17  10   0    5.98    0.19
  17  10   0    5.94    0.18
  17  10   0    5.18    0.18
  18 -10   0    1.81    0.09
 -18 -10   0    1.58    0.09
  18  10   0    1.68    0.10
  18  10   0    1.69    0.10
 -18  10   0    1.84    0.10
 -18  10   0    1.68    0.10
 -19 -10   0    3.50    0.14
  19 -10   0    3.72    0.13
 -19  10   0    3.71    0.15
  19  10   0    3.63    0.14
  19  10   0    3.57    0.14
 -19  10   0    3.74    0.14
  20 -10   0    0.07    0.05
 -20 -10   0    0.07    0.06
 -20  10   0   -0.05    0.06
  20  10   0    0.00    0.06
  20  10   0    0.09    0.05
 -20  10   0    0.12    0.05
  21 -10   0    0.96    0.08
 -21 -10   0    0.95    0.08
  21  10   0    0.90    0.08
  21  10   0    0.89    0.08
 -21  10   0    0.91    0.09
 -21  10   0    1.07    0.09
  22 -10   0    0.97    0.08
 -22 -10   0    1.01    0.09
  22  10   0    1.07    0.09
  22  10   0    0.99    0.09
 -22  10   0    1.05    0.09
 -22  10   0    1.03    0.10
  23 -10   0   -0.02    0.05
 -23 -10   0   -0.06    0.06
  23  10   0    0.03    0.06
  23  10   0    0.00    0.05
 -23  10   0    0.03    0.05
 -23  10   0    0.00    0.06
 -24 -10   0    0.24    0.07
  24 -10   0    0.24    0.06
  24  10   0    0.19    0.06
 -24  10   0    0.35    0.07
 -24  10   0    0.30    0.07
  24  10   0    0.27    0.07
  25 -10   0    1.18    0.09
 -25 -10   0    1.36    0.10
  25  10   0    1.26    0.10
  25  10   0    1.35    0.10
  26 -10   0    0.02    0.06
   0 -11   0    0.21    0.04
   0  11   0    0.16    0.04
  -1 -11   0    1.02    0.07
   1 -11   0    0.87    0.07
   1  11   0    0.82    0.07
  -1  11   0    0.91    0.07
   1  11   0    0.97    0.07
  -1  11   0    1.11    0.07
  -2 -11   0    0.01    0.04
  -2  11   0   -0.03    0.04
   2  11   0    0.00    0.04
   2  11   0    0.05    0.04
  -2  11   0    0.05    0.04
  -2  11   0    0.09    0.04
  -3 -11   0    1.28    0.08
  -3  11   0    1.16    0.08
   3  11   0    1.24    0.08
   3  11   0    1.25    0.08
  -3  11   0    1.23    0.08
  -3  11   0    1.38    0.08
  -3  11   0    1.36    0.08
  -4 -11   0    2.53    0.10
   4  11   0    2.54    0.11
  -4  11   0    2.54    0.10
   4  11   0    2.40    0.10
  -4  11   0    2.52    0.10
  -4  11   0    2.62    0.11
  -4  11   0    2.71    0.11
  -5 -11   0    0.81    0.07
   5  11   0    0.68    0.07
   5  11   0    0.83    0.07
  -5  11   0    0.69    0.07
  -5  11   0    0.73    0.06
  -5  11   0    0.90    0.07
   6 -11   0    0.61    0.05
  -6 -11   0    0.69    0.06
  -6  11   0    0.73    0.06
   6  11   0    0.62    0.06
   6  11   0    0.70    0.07
  -6  11   0    0.72    0.07
  -6  11   0    0.69    0.06
   7 -11   0    0.92    0.07
  -7 -11   0    1.00    0.07
   7  11   0    0.87    0.08
  -7  11   0    0.99    0.08
  -7  11   0    1.03    0.07
   7  11   0    0.88    0.07
   8 -11   0    0.21    0.04
  -8 -11   0    0.24    0.05
  -8  11   0    0.26    0.05
   8  11   0    0.25    0.06
   8  11   0    0.29    0.05
   9 -11   0    3.20    0.11
  -9 -11   0    3.02    0.12
   9  11   0    3.27    0.12
   9  11   0    2.87    0.12
  -9  11   0    3.10    0.12
  -9  11   0    3.28    0.13
  10 -11   0   -0.01    0.04
 -10 -11   0   -0.03    0.04
  10  11   0   -0.01    0.04
  10  11   0    0.00    0.04
 -10  11   0    0.02    0.04
 -10  11   0    0.01    0.04
 -11 -11   0    0.21    0.05
  11 -11   0    0.23    0.04
  11  11   0    0.17    0.05
 -11  11   0    0.26    0.05
  11  11   0    0.19    0.05
 -11  11   0    0.15    0.05
 -12 -11   0    2.58    0.11
  12 -11   0    2.71    0.10
 -12  11   0    2.73    0.12
  12  11   0    2.87    0.12
 -12  11   0    2.77    0.12
  12  11   0    2.76    0.12
  13 -11   0    2.27    0.10
 -13 -11   0    2.46    0.11
 -13  11   0    2.40    0.12
  13  11   0    2.19    0.11
  13  11   0    2.42    0.11
 -13  11   0    2.59    0.11
 -14 -11   0    5.12    0.17
  14 -11   0    5.10    0.16
 -14  11   0    5.28    0.17
 -14  11   0    5.08    0.18
  14  11   0    5.37    0.17
  14  11   0    4.81    0.17
 -15 -11   0    1.58    0.09
  15 -11   0    1.59    0.08
 -15  11   0    1.66    0.10
  15  11   0    1.52    0.09
 -15  11   0    1.64    0.09
  15  11   0    1.80    0.10
  16 -11   0    1.36    0.08
 -16 -11   0    1.33    0.09
 -16  11   0    1.30    0.10
  16  11   0    1.47    0.09
 -16  11   0    1.35    0.09
  16  11   0    1.20    0.09
 -17 -11   0   -0.05    0.05
  17 -11   0    0.06    0.05
 -17  11   0    0.06    0.06
  17  11   0    0.05    0.05
  17  11   0   -0.08    0.06
 -17  11   0    0.03    0.05
 -18 -11   0    2.32    0.11
  18 -11   0    2.27    0.10
 -18  11   0    2.32    0.11
  18  11   0    2.42    0.12
  18  11   0    2.17    0.11
 -18  11   0    2.23    0.12
 -19 -11   0    0.16    0.06
  19 -11   0    0.34    0.06
 -19  11   0    0.47    0.07
 -19  11   0    0.30    0.06
  19  11   0    0.34    0.07
  19  11   0    0.34    0.06
  20 -11   0   10.50    0.28
 -20 -11   0   10.24    0.30
  20  11   0   10.26    0.30
  20  11   0   10.44    0.29
 -20  11   0   10.21    0.31
  21 -11   0   -0.01    0.05
 -21 -11   0   -0.03    0.06
  21  11   0    0.05    0.06
 -21  11   0    0.02    0.06
  21  11   0    0.02    0.06
 -22 -11   0    2.09    0.12
  22 -11   0    2.22    0.11
  22  11   0    2.14    0.11
  22  11   0    2.02    0.12
 -22  11   0    2.21    0.12
  23 -11   0    0.47    0.07
 -23 -11   0    0.32    0.08
  23  11   0    0.50    0.07
  23  11   0    0.40    0.07
  24 -11   0    1.17    0.09
  24  11   0    1.19    0.10
  24  11   0    1.19    0.10
   0 -12   0    2.98    0.11
   0  12   0    2.75    0.12
   0  12   0    2.98    0.11
   1 -12   0    0.79    0.07
  -1 -12   0    0.92    0.07
  -1  12   0    0.89    0.08
   1  12   0    0.80    0.07
  -1  12   0    0.87    0.07
   1  12   0    0.83    0.07
   2 -12   0    1.05    0.07
  -2 -12   0    0.95    0.07
   2  12   0    1.03    0.08
  -2  12   0    1.10    0.08
  -2  12   0    0.84    0.07
   2  12   0    0.97    0.07
  -3 -12   0   13.00    0.35
   3  12   0   13.77    0.34
  -3  12   0   13.58    0.34
  -3  12   0   13.09    0.34
   3  12   0   12.56    0.35
  -4 -12   0    4.89    0.16
   4  12   0    5.31    0.17
  -4  12   0    5.32    0.17
  -4  12   0    5.20    0.16
  -4  12   0    5.37    0.16
  -4  12   0    5.26    0.17
   4  12   0    5.16    0.17
  -5 -12   0   -0.02    0.04
   5  12   0   -0.03    0.04
   5  12   0    0.03    0.05
  -5  12   0   -0.08    0.04
  -5  12   0   -0.02    0.04
  -5  12   0    0.03    0.05
   6 -12   0    0.13    0.04
  -6 -12   0    0.20    0.05
   6  12   0    0.19    0.05
  -6  12   0    0.20    0.05
   6  12   0    0.20    0.05
  -6  12   0    0.15    0.05
  -7 -12   0    0.03    0.04
   7 -12   0    0.00    0.04
  -7  12   0   -0.08    0.04
  -7  12   0   -0.07    0.04
   7  12   0   -0.03    0.04
   7  12   0   -0.06    0.05
   8 -12   0    0.10    0.04
  -8 -12   0    0.11    0.04
  -8  12   0    0.10    0.05
   8  12   0    0.08    0.05
   8  12   0    0.04    0.05
  -8  12   0    0.05    0.05
   9 -12   0    4.92    0.15
  -9 -12   0    4.81    0.16
  -9  12   0    5.11    0.17
   9  12   0    5.04    0.16
  -9  12   0    4.84    0.17
   9  12   0    4.67    0.16
  10 -12   0    6.14    0.18
 -10 -12   0    6.13    0.19
 -10  12   0    6.45    0.20
  10  12   0    6.47    0.20
 -10  12   0    6.37    0.20
  10  12   0    6.27    0.20
  11 -12   0    3.09    0.12
 -11 -12   0    3.17    0.12
 -11  12   0    3.20    0.13
 -11  12   0    3.19    0.13
  11  12   0    2.91    0.13
  11  12   0    2.97    0.12
  12 -12   0    0.09    0.04
 -12 -12   0    0.00    0.05
  12  12   0    0.01    0.05
 -12  12   0    0.14    0.06
  12  12   0    0.08    0.06
 -12  12   0    0.07    0.05
  13 -12   0    0.51    0.06
 -13 -12   0    0.38    0.06
  13  12   0    0.52    0.07
  13  12   0    0.45    0.06
 -13  12   0    0.60    0.07
 -13  12   0    0.45    0.06
 -14 -12   0    1.41    0.09
  14 -12   0    1.49    0.09
  14  12   0    1.26    0.09
  14  12   0    1.43    0.09
 -14  12   0    1.51    0.11
 -15 -12   0    3.72    0.14
  15 -12   0    3.87    0.13
  15  12   0    3.90    0.15
  15  12   0    3.66    0.15
 -15  12   0    3.59    0.15
 -16 -12   0    0.14    0.06
  16 -12   0    0.17    0.05
  16  12   0    0.19    0.06
 -16  12   0    0.15    0.07
  16  12   0    0.13    0.06
 -17 -12   0    7.71    0.24
  17  12   0    8.10    0.24
  17  12   0    7.86    0.25
 -17  12   0    7.69    0.25
 -18 -12   0    0.79    0.08
  18  12   0    0.89    0.08
  18  12   0    0.93    0.09
 -18  12   0    0.97    0.09
 -19 -12   0    0.87    0.08
  19  12   0    0.89    0.08
 -19  12   0    0.87    0.09
  19  12   0    0.73    0.09
 -20 -12   0    0.05    0.07
  20  12   0    0.04    0.07
  20  12   0    0.10    0.06
 -20  12   0    0.17    0.07
 -21 -12   0    6.85    0.22
  21  12   0    6.68    0.22
  21  12   0    7.17    0.23
 -22 -12   0    0.23    0.07
  22  12   0    0.16    0.06
   1 -13   0    0.06    0.05
  -1 -13   0   -0.01    0.04
   1  13   0    0.05    0.05
  -1  13   0   -0.03    0.05
  -2 -13   0    2.97    0.12
   2 -13   0    2.78    0.12
  -2  13   0    2.72    0.12
   2  13   0    2.68    0.12
   2  13   0    2.73    0.11
  -3 -13   0    0.05    0.04
   3 -13   0   -0.02    0.04
  -3  13   0   -0.04    0.05
   3  13   0    0.01    0.05
   3  13   0    0.01    0.05
  -4 -13   0    0.04    0.05
   4  13   0    0.06    0.05
  -4  13   0   -0.01    0.05
   4  13   0    0.04    0.05
  -5 -13   0    2.74    0.11
   5  13   0    2.37    0.11
  -5  13   0    2.50    0.11
   5  13   0    2.38    0.11
  -6 -13   0    1.49    0.09
  -6  13   0    1.42    0.09
   6  13   0    1.54    0.09
   6  13   0    1.61    0.10
  -7 -13   0    0.20    0.05
   7  13   0    0.14    0.05
  -7  13   0    0.17    0.06
   7  13   0    0.16    0.06
  -8 -13   0    1.09    0.08
   8  13   0    1.06    0.08
   8  13   0    0.91    0.08
  -8  13   0    1.00    0.08
  -9 -13   0    0.21    0.05
  -9  13   0    0.30    0.06
   9  13   0    0.12    0.05
   9  13   0    0.13    0.06
 -10 -13   0    3.36    0.13
  10  13   0    3.28    0.14
  10  13   0    3.49    0.14
 -10  13   0    3.52    0.14
 -11 -13   0    0.68    0.07
  11  13   0    0.59    0.08
 -11  13   0    0.71    0.08
  11  13   0    0.69    0.07
 -12 -13   0    0.02    0.05
  12  13   0    0.01    0.05
 -12  13   0    0.08    0.06
  12  13   0    0.02    0.05
 -13 -13   0    0.02    0.05
  13  13   0    0.14    0.06
  13  13   0   -0.01    0.06
 -13  13   0    0.11    0.06
 -14 -13   0    0.05    0.06
  14  13   0    0.05    0.06
 -14  13   0    0.14    0.07
  14  13   0    0.09    0.06
 -15 -13   0    0.06    0.06
  15  13   0    0.10    0.06
 -15  13   0    0.12    0.06
  15  13   0    0.05    0.06
 -16 -13   0    2.94    0.13
 -16  13   0    3.18    0.14
  16  13   0    2.80    0.14
  16  13   0    3.25    0.14
 -17 -13   0    1.08    0.09
  17  13   0    0.94    0.09
 -17  13   0    1.27    0.11
 -18 -13   0    2.66    0.13
  18  13   0    2.52    0.14
 -18  13   0    2.53    0.13
 -19 -13   0    0.17    0.07
 -20 -13   0   -0.06    0.07
   0  14   0    0.98    0.09
  -1  14   0   11.55    0.31
   1  14   0   11.00    0.31
   2  14   0    5.81    0.19
  -2  14   0    5.68    0.19
  -3 -14   0    3.08    0.13
   3  14   0    3.17    0.13
  -4 -14   0    1.00    0.08
   4  14   0    1.04    0.09
  -5 -14   0    2.61    0.11
   5  14   0    2.43    0.12
  -6 -14   0    0.78    0.07
   6  14   0    0.79    0.08
   7 -14   0    5.59    0.19
  -7 -14   0    5.87    0.19
   7  14   0    5.54    0.19
  -8 -14   0    2.21    0.11
   8  14   0    2.16    0.12
  -9 -14   0    5.49    0.18
   9  14   0    5.47    0.19
 -10 -14   0    0.73    0.07
  10  14   0    0.63    0.08
 -11 -14   0    0.20    0.06
  11  14   0    0.33    0.07
 -12 -14   0    0.03    0.06
  12  14   0    0.02    0.06
 -13 -14   0    0.23    0.06
  13  14   0    0.11    0.06
 -14 -14   0    6.01    0.20
  14  14   0    5.91    0.21
 -15 -14   0    0.12    0.06
 -16 -14   0    0.46    0.07
 -17 -14   0    0.67    0.08
   0  15   0    0.08    0.06
   1  15   0   -0.08    0.06
   2  15   0   -0.01    0.06
   3  15   0    0.10    0.06
   4  15   0    0.17    0.06
   5  15   0   -0.03    0.06
   6  15   0    0.99    0.09
   7  15   0    0.00    0.06
   8  15   0    0.05    0.07
   9  15   0    0.11    0.07
  10 -15   0    1.25    0.10
  10  15   0    1.59    0.11
  11 -15   0    0.43    0.07
  12 -15   0    1.69    0.11
  13 -15   0    0.09    0.06
   5  16   0    5.84    0.21
 -32   0   1    0.09    0.06
  31   0  -1    1.35    0.09
 -31   0   1    1.34    0.10
  30   0  -1    0.00    0.05
 -30   0   1    0.03    0.05
 -29   0   1    9.92    0.29
  29   0  -1   10.61    0.29
  28   0  -1    0.07    0.05
 -28   0   1    0.19    0.05
 -27   0   1    1.19    0.09
  27   0  -1    1.16    0.08
 -26   0   1   -0.03    0.05
  26   0  -1   -0.02    0.04
 -25   0   1    0.61    0.06
  25   0  -1    0.65    0.06
 -24   0   1    0.07    0.04
  24   0  -1    0.07    0.04
  23   0  -1   26.34    0.63
 -23   0   1   26.36    0.66
  22   0  -1    0.10    0.04
  21   0  -1    1.75    0.08
 -21   0   1    1.69    0.08
 -21   0   1    1.87    0.09
 -20   0   1   -0.03    0.03
 -20   0   1    0.00    0.03
  20   0  -1    0.05    0.04
 -19   0   1    3.67    0.12
 -19   0   1    3.76    0.12
  19   0  -1    3.70    0.12
 -18   0   1    0.00    0.03
  18   0  -1   -0.05    0.03
 -18   0   1   -0.04    0.03
 -17   0   1    7.16    0.20
  17   0  -1    7.43    0.20
 -17   0   1    7.85    0.20
 -16   0   1   -0.05    0.02
  16   0  -1   -0.02    0.03
 -16   0   1    0.02    0.02
 -16   0   1    0.05    0.03
 -15   0   1    8.81    0.22
 -15   0   1    8.03    0.22
  15   0  -1    8.93    0.22
 -14   0   1    0.00    0.02
 -14   0   1   -0.05    0.02
  14   0  -1   -0.01    0.02
  13   0  -1    0.29    0.03
 -13   0   1    0.30    0.03
  13   0  -1    0.32    0.02
 -13   0   1    0.29    0.03
  12   0  -1   -0.04    0.02
 -12   0   1   -0.05    0.02
 -12   0   1   -0.01    0.02
  12   0  -1   -0.03    0.02
  11   0  -1    0.19    0.02
  11   0  -1    0.20    0.02
 -11   0   1    0.21    0.03
 -11   0   1    0.19    0.03
  10   0  -1   -0.05    0.01
 -10   0   1   -0.03    0.02
 -10   0   1   -0.05    0.02
  10   0  -1   -0.07    0.02
   9   0  -1    7.59    0.18
  -9   0   1    7.89    0.18
  -9   0   1    6.84    0.19
  -8   0   1   -0.02    0.02
   8   0  -1   -0.01    0.01
  -8   0   1    0.01    0.02
   8   0  -1   -0.01    0.01
  -7   0   1   13.23    0.30
   7   0  -1   12.10    0.29
   7   0  -1   12.76    0.29
  -7   0   1   12.57    0.31
   6   0  -1   -0.03    0.01
  -6   0   1   -0.08    0.02
  -6   0   1   -0.03    0.02
   5   0  -1    0.05    0.01
  -5   0   1    0.06    0.02
   5   0  -1    0.07    0.01
  -5   0   1    0.06    0.01
  -4   0   1   -0.34    0.01
   4   0  -1   -0.34    0.01
  -4   0   1   -0.34    0.01
  -3   0   1    0.06    0.01
  -3   0   1    0.04    0.01
  -3   0   1    0.05    0.01
   3   0  -1    0.04    0.01
  -2   0   1   -0.58    0.00
   2   0  -1   -0.58    0.00
   2   0  -1   -0.58    0.00
  -2   0   1   -0.58    0.00
  -1   0  -1   -0.34    0.00
   1   0   1   -0.34    0.00
   1   0   1   -0.34    0.00
  -1   0  -1   -0.34    0.00
  -2   0  -1   -0.15    0.01
  -2   0  -1   -0.15    0.01
   2   0   1   -0.14    0.00
   2   0   1   -0.14    0.01
   3   0   1    0.95    0.03
  -3   0  -1    0.81    0.03
   3   0   1    0.89    0.03
  -3   0  -1    0.82    0.03
  -4   0  -1   -0.02    0.01
   4   0   1   -0.03    0.01
  -4   0  -1   -0.03    0.01
   4   0   1   -0.01    0.01
  -5   0  -1    0.70    0.04
  -5   0  -1    0.74    0.04
   5   0   1    0.78    0.04
   5   0   1    0.74    0.03
   6   0   1   -0.30    0.01
  -6   0  -1   -0.30    0.02
   6   0   1   -0.29    0.02
  -6   0  -1   -0.29    0.02
   7   0   1   15.79    0.34
  -7   0  -1   14.20    0.36
  -7   0  -1   15.06    0.35
   7   0   1   14.69    0.35
   8   0   1    0.01    0.01
  -8   0  -1    0.00    0.02
  -8   0  -1    0.00    0.02
   8   0   1    0.00    0.02
   9   0   1    4.83    0.12
   9   0   1    4.69    0.12
  -9   0  -1    4.84    0.13
 -10   0  -1   -0.05    0.02
  10   0   1   -0.03    0.02
 -10   0  -1    0.03    0.02
  10   0   1   -0.05    0.01
 -11   0  -1    0.26    0.03
 -11   0  -1    0.25    0.03
  11   0   1    0.28    0.02
  11   0   1    0.28    0.03
 -12   0  -1   -0.06    0.02
 -12   0  -1    0.00    0.02
  12   0   1    0.00    0.02
  12   0   1   -0.03    0.02
  13   0   1   24.68    0.57
  13   0   1   25.27    0.58
 -13   0  -1   24.48    0.60
 -13   0  -1   24.79    0.59
 -14   0  -1    0.03    0.03
 -14   0  -1   -0.02    0.03
  14   0   1    0.02    0.02
  14   0   1    0.01    0.02
  15   0   1    1.81    0.07
 -15   0  -1    1.88    0.07
 -15   0  -1    1.72    0.07
  15   0   1    1.73    0.06
  16   0   1    0.01    0.03
 -16   0  -1    0.08    0.03
 -16   0  -1    0.04    0.03
  16   0   1    0.06    0.02
  17   0   1    2.80    0.09
 -17   0  -1    2.63    0.10
 -17   0  -1    3.06    0.10
 -18   0  -1    0.01    0.03
 -18   0  -1    0.07    0.03
  18   0   1    0.01    0.03
  19   0   1   14.22    0.35
 -19   0  -1   13.82    0.36
 -19   0  -1   14.62    0.36
 -20   0  -1    0.00    0.03
  20   0   1   -0.05    0.03
 -20   0  -1   -0.03    0.03
 -21   0  -1    0.02    0.04
  21   0   1   -0.01    0.04
 -21   0  -1   -0.02    0.04
  22   0   1   -0.01    0.04
 -22   0  -1   -0.01    0.04
 -23   0  -1    0.67    0.06
  23   0   1    0.65    0.06
  24   0   1    0.00    0.04
 -24   0  -1    0.03    0.05
 -25   0  -1    4.32    0.15
  25   0   1    4.27    0.14
 -26   0  -1    0.01    0.05
  26   0   1    0.04    0.04
 -27   0  -1    3.87    0.15
  27   0   1    3.97    0.14
  28   0   1   -0.02    0.05
 -28   0  -1   -0.02    0.05
  29   0   1   -0.07    0.05
 -29   0  -1   -0.06    0.05
 -30   0  -1    0.09    0.06
  30   0   1    0.03    0.05
  31   0   1    1.15    0.09
 -31   0  -1    1.28    0.10
  31  -1  -1    1.41    0.09
 -31  -1   1    1.62    0.10
  31   1  -1    1.73    0.10
 -31   1   1    1.44    0.10
 -30  -1   1    0.88    0.08
  30  -1  -1    0.86    0.08
  30   1  -1    0.85    0.08
 -30   1   1    0.90    0.08
  29  -1  -1    3.34    0.13
 -29  -1   1    3.40    0.14
 -29   1   1    3.35    0.14
  29   1  -1    3.43    0.14
 -28  -1   1    0.00    0.05
  28  -1  -1    0.09    0.05
  28   1  -1    0.11    0.05
 -28   1   1    0.08    0.05
 -27  -1   1    0.26    0.06
  27  -1  -1    0.26    0.06
 -27   1   1    0.30    0.06
  27   1  -1    0.32    0.05
  26  -1  -1    6.75    0.20
 -26  -1   1    6.37    0.20
  26   1  -1    6.60    0.20
 -26   1   1    6.78    0.21
  25  -1  -1    0.60    0.06
 -25  -1   1    0.53    0.06
 -25   1   1    0.51    0.06
  25   1  -1    0.62    0.06
  24  -1  -1    1.27    0.08
 -24  -1   1    1.10    0.07
  24   1  -1    1.09    0.07
 -24   1   1    1.18    0.07
  23  -1  -1    0.33    0.05
 -23  -1   1    0.31    0.05
 -23   1   1    0.32    0.05
  23   1  -1    0.37    0.05
 -23   1   1    0.41    0.05
 -22  -1   1    1.77    0.08
  22  -1  -1    1.90    0.09
  22   1  -1    1.67    0.08
 -22   1   1    1.78    0.08
 -22   1   1    1.84    0.09
  21  -1  -1   11.34    0.29
 -21  -1   1   10.31    0.29
 -21   1   1   11.51    0.29
 -21   1   1   11.01    0.29
  21   1  -1   11.13    0.29
 -20  -1   1   40.81    1.02
  20  -1  -1   43.77    0.98
 -20   1   1   43.44    1.00
 -20   1   1   40.54    1.02
  20   1  -1   42.90    0.98
  19  -1  -1    1.89    0.08
 -19  -1   1    1.86    0.08
 -19  -1   1    2.17    0.08
 -19   1   1    1.93    0.08
  19   1  -1    1.84    0.08
 -19   1   1    2.19    0.09
 -18  -1   1    5.04    0.15
  18  -1  -1    5.31    0.15
 -18  -1   1    5.20    0.14
 -18   1   1    5.30    0.15
 -18   1   1    4.96    0.15
  18   1  -1    5.18    0.15
 -17  -1   1    0.29    0.04
  17  -1  -1    0.26    0.04
 -17  -1   1    0.26    0.03
  17   1  -1    0.20    0.03
 -17   1   1    0.19    0.04
  17   1  -1    0.32    0.04
 -17   1   1    0.30    0.04
  16  -1  -1    6.50    0.17
 -16  -1   1    6.40    0.17
 -16  -1   1    6.49    0.18
 -16   1   1    6.62    0.18
 -16   1   1    6.40    0.18
  16   1  -1    6.28    0.17
  16   1  -1    6.46    0.16
  15  -1  -1   53.83    1.21
 -15  -1   1   50.99    1.23
 -15  -1   1   51.86    1.25
  15   1  -1   53.65    1.21
 -15   1   1   53.53    1.23
 -15   1   1   52.59    1.25
 -15   1   1   53.38    1.20
  15   1  -1   53.59    1.21
 -14  -1   1   60.03    1.36
  14  -1  -1   59.21    1.34
 -14  -1   1   56.92    1.39
  14   1  -1   58.35    1.35
 -14   1   1   59.88    1.34
 -14   1   1   56.00    1.39
 -14   1   1   60.17    1.37
  14   1  -1   60.27    1.34
  13  -1  -1    2.39    0.08
 -13  -1   1    2.22    0.07
 -13  -1   1    2.08    0.08
 -13   1   1    2.21    0.08
  13   1  -1    2.31    0.07
 -13   1   1    2.09    0.08
 -13   1   1    2.15    0.06
  13   1  -1    2.15    0.07
 -12  -1   1   67.63    1.57
 -12  -1   1   65.30    1.60
  12  -1  -1   69.29    1.55
 -12   1   1   68.07    1.56
  12   1  -1   69.07    1.56
  12   1  -1   67.81    1.55
 -12   1   1   69.76    1.58
 -11  -1   1   33.86    0.80
 -11  -1   1   33.88    0.78
  11  -1  -1   34.35    0.77
 -11   1   1   32.77    0.77
  11   1  -1   34.72    0.78
  11   1  -1   34.21    0.77
 -11   1   1   33.98    0.79
 -11   1   1   31.97    0.80
 -10  -1   1    0.01    0.02
  10  -1  -1    0.00    0.02
 -10  -1   1    0.00    0.02
 -10   1   1   -0.01    0.02
 -10   1   1    0.00    0.01
  10   1  -1    0.00    0.02
 -10   1   1    0.02    0.02
  10   1  -1   -0.01    0.02
  -9  -1   1   24.78    0.58
  -9  -1   1   24.54    0.59
   9  -1  -1   25.63    0.57
   9   1  -1   25.72    0.57
  -9   1   1   24.52    0.56
  -9   1   1   23.69    0.59
  -9   1   1   24.59    0.58
  -8  -1   1   18.31    0.42
  -8  -1   1   16.86    0.43
   8   1  -1   18.04    0.42
   8   1  -1   18.55    0.42
  -8   1   1   18.41    0.43
  -8   1   1   18.62    0.41
  -8   1   1   17.37    0.43
  -7  -1   1   81.06    2.06
  -7  -1   1   89.62    2.03
  -7   1   1   86.97    1.99
  -7   1   1   85.18    2.07
  -7   1   1   86.85    2.03
   7   1  -1   91.94    2.26
   7   1  -1   92.01    2.02
  -6  -1   1    1.52    0.04
  -6  -1   1    1.46    0.05
   6  -1  -1    1.55    0.05
  -6   1   1    1.56    0.05
  -6   1   1    1.37    0.05
   6   1  -1    1.42    0.05
   6   1  -1    1.52    0.05
  -5  -1   1    1.18    0.04
  -5   1   1    1.16    0.04
   5   1  -1    1.09    0.04
   5   1  -1    1.04    0.04
  -5   1   1    1.02    0.04
  -4  -1   1   20.38    0.48
   4  -1  -1   20.89    0.46
   4   1  -1   19.13    0.46
  -4   1   1   19.84    0.47
   4   1  -1   19.56    0.46
  -4   1   1   20.01    0.48
   4   1  -1   21.22    0.47
   3  -1  -1   31.88    0.70
   3   1  -1   30.59    0.71
  -3   1   1   29.53    0.71
  -2  -1   1  137.50    3.63
   2  -1  -1  133.02    3.42
  -2   1   1  150.06    3.27
   2   1  -1  143.92    3.63
   2   1  -1  144.32    3.23
  -2   1   1  138.84    3.35
  -1  -1   1   49.48    1.17
  -1   1   1   50.01    1.14
  -1   1   1   51.04    1.13
   1   1  -1   48.92    1.15
   1   1  -1   48.25    1.14
  -1   1   1   48.76    1.18
   1   1  -1   50.86    1.15
   0  -1   1   75.34    1.72
   0  -1  -1   73.90    1.74
   0   1   1   75.66    1.70
   0   1   1   74.08    2.12
   0   1  -1   78.71    1.77
   0   1  -1   73.70    1.74
   0   1   1   75.98    2.00
   1  -1   1  235.80    5.56
  -1  -1  -1  240.13    5.58
  -1  -1  -1  241.32    5.96
  -1   1  -1  231.63    5.72
  -1   1  -1  238.96    5.77
   1   1   1  222.99    5.55
  -1   1  -1  232.17    5.84
  -2  -1  -1    0.18    0.01
   2  -1   1    0.13    0.01
  -2  -1  -1    0.17    0.02
   2  -1   1    0.18    0.02
  -2   1  -1    0.15    0.02
  -2   1  -1    0.16    0.02
   2   1   1    0.17    0.02
   2   1   1    0.15    0.02
  -3  -1  -1   11.57    0.27
  -3  -1  -1   11.97    0.28
   3  -1   1   11.76    0.27
  -3   1  -1   12.18    0.28
   3   1   1   12.08    0.27
  -3   1  -1   11.82    0.28
   3   1   1   11.57    0.27
  -4  -1  -1   29.55    0.70
   4  -1   1   30.98    0.69
   4  -1   1   31.22    0.69
  -4  -1  -1   28.71    0.71
   4   1   1   30.88    0.70
   4   1   1   30.09    0.70
  -4   1  -1   30.77    0.70
  -4   1  -1   31.06    0.71
  -5  -1  -1    4.58    0.11
   5  -1   1    4.54    0.11
   5  -1   1    4.74    0.12
  -5  -1  -1    4.76    0.12
  -5   1  -1    4.68    0.12
   5   1   1    4.45    0.12
   5   1   1    4.83    0.12
  -5   1  -1    4.64    0.12
  -6  -1  -1    2.51    0.07
  -6  -1  -1    2.67    0.07
  -6   1  -1    2.39    0.07
   6   1   1    2.52    0.07
   6   1   1    2.58    0.07
  -6   1  -1    2.58    0.07
   7  -1   1  239.06    5.08
  -7  -1  -1  227.68    5.25
   7  -1   1  189.13    5.15
  -7  -1  -1  222.81    5.14
  -7   1  -1  227.48    5.25
  -7   1  -1  225.52    5.17
   7   1   1  218.17    5.07
   7   1   1  236.95    5.11
  -8  -1  -1    0.33    0.03
   8  -1   1    0.37    0.03
  -8  -1  -1    0.36    0.03
   8  -1   1    0.35    0.02
  -8   1  -1    0.30    0.03
   8   1   1    0.41    0.03
   8   1   1    0.37    0.03
  -8   1  -1    0.32    0.03
  -9  -1  -1    0.02    0.02
  -9  -1  -1    0.04    0.02
   9  -1   1    0.02    0.01
   9  -1   1   -0.01    0.02
  -9   1  -1   -0.01    0.02
  -9   1  -1   -0.03    0.02
   9   1   1   -0.02    0.02
   9   1   1   -0.01    0.02
 -10  -1  -1   10.13    0.27
  10  -1   1   10.76    0.25
  10  -1   1   11.10    0.26
 -10  -1  -1   11.03    0.26
 -10   1  -1   11.09    0.27
  10   1   1   11.09    0.26
  10   1   1   10.89    0.26
 -10   1  -1   10.17    0.27
 -11  -1  -1   39.18    0.91
  11  -1   1   40.57    0.89
  11  -1   1   40.27    0.89
 -11   1  -1   37.46    0.93
 -11   1  -1   37.78    0.91
  11   1   1   38.48    0.89
  11   1   1   39.74    0.90
 -12  -1  -1   10.60    0.25
  12  -1   1   10.30    0.24
  12  -1   1   10.40    0.25
 -12  -1  -1    9.75    0.26
 -12   1  -1   10.35    0.26
  12   1   1   10.81    0.25
  12   1   1   10.54    0.25
 -12   1  -1    9.91    0.26
 -13  -1  -1   36.06    0.86
  13  -1   1   35.96    0.82
 -13  -1  -1   35.78    0.84
  13  -1   1   36.16    0.83
  13   1   1   36.74    0.83
  13   1   1   36.09    0.83
 -13   1  -1   35.83    0.86
 -13   1  -1   36.36    0.85
  14  -1   1    0.40    0.02
 -14  -1  -1    0.27    0.03
  14  -1   1    0.34    0.03
 -14  -1  -1    0.42    0.04
 -14   1  -1    0.35    0.04
  14   1   1    0.37    0.04
 -14   1  -1    0.39    0.04
  14   1   1    0.43    0.03
 -15  -1  -1    5.54    0.14
 -15  -1  -1    5.04    0.15
  15  -1   1    5.16    0.15
 -15   1  -1    5.33    0.15
 -15   1  -1    5.60    0.15
  15   1   1    5.47    0.15
  15   1   1    5.27    0.14
 -16  -1  -1   26.04    0.63
 -16  -1  -1   27.25    0.62
  16   1   1   25.85    0.61
  16   1   1   26.58    0.61
 -16   1  -1   25.34    0.62
 -16   1  -1   25.04    0.63
 -17  -1  -1    5.37    0.15
 -17  -1  -1    5.18    0.16
  17  -1   1    5.63    0.15
 -17   1  -1    5.27    0.16
  17   1   1    5.44    0.15
 -17   1  -1    5.14    0.15
  17   1   1    5.60    0.14
 -18  -1  -1    1.10    0.06
 -18  -1  -1    1.15    0.07
  18  -1   1    1.12    0.06
 -18   1  -1    1.04    0.06
  18   1   1    1.12    0.06
 -18   1  -1    0.94    0.06
  19  -1   1    0.28    0.04
 -19  -1  -1    0.37    0.04
 -19  -1  -1    0.36    0.04
 -19   1  -1    0.30    0.04
  19   1   1    0.32    0.04
 -19   1  -1    0.28    0.05
  20  -1   1    0.71    0.06
 -20  -1  -1    0.81    0.07
 -20   1  -1    0.67    0.06
  20   1   1    0.86    0.06
 -20   1  -1    0.79    0.06
 -21  -1  -1    8.97    0.25
  21  -1   1    9.59    0.25
  21   1   1    9.32    0.25
 -21   1  -1    9.45    0.26
 -21   1  -1    9.32    0.25
  22  -1   1    1.78    0.08
 -22  -1  -1    1.68    0.08
  22   1   1    1.69    0.08
 -22   1  -1    1.71    0.09
 -22   1  -1    1.70    0.08
  23  -1   1    0.04    0.04
 -23  -1  -1    0.08    0.04
  23   1   1    0.01    0.04
 -23   1  -1    0.01    0.04
 -23   1  -1    0.04    0.04
  24  -1   1    0.38    0.05
 -24  -1  -1    0.37    0.06
  24   1   1    0.35    0.05
 -24   1  -1    0.33    0.05
 -25  -1  -1    0.15    0.05
  25  -1   1    0.18    0.05
  25   1   1    0.13    0.05
 -25   1  -1    0.15    0.05
 -26  -1  -1    6.84    0.21
  26  -1   1    6.58    0.20
 -26   1  -1    6.73    0.21
  26   1   1    6.78    0.20
 -27  -1  -1    0.16    0.05
  27  -1   1    0.18    0.05
  27   1   1    0.14    0.05
 -27   1  -1    0.17    0.06
  28  -1   1    0.20    0.06
 -28  -1  -1    0.25    0.06
  28   1   1    0.27    0.06
 -28   1  -1    0.17    0.05
  29  -1   1    0.60    0.07
 -29  -1  -1    0.54    0.07
  29   1   1    0.52    0.06
 -29   1  -1    0.38    0.07
 -30  -1  -1    1.73    0.10
  30  -1   1    1.86    0.11
 -30   1  -1    2.05    0.11
  30   1   1    1.80    0.11
 -31  -1  -1    0.16    0.06
  31  -1   1    0.27    0.06
 -31   1  -1    0.27    0.07
 -31  -2   1    2.32    0.12
  31  -2  -1    2.45    0.12
  31   2  -1    2.37    0.12
 -31   2   1    2.38    0.12
  30  -2  -1    0.08    0.06
 -30  -2   1    0.00    0.05
 -30   2   1    0.11    0.06
  30   2  -1    0.16    0.06
 -29  -2   1    0.34    0.06
  29  -2  -1    0.37    0.06
 -29   2   1    0.35    0.06
  29   2  -1    0.46    0.06
  28  -2  -1   -0.01    0.05
 -28  -2   1    0.01    0.05
  28   2  -1    0.03    0.04
 -28   2   1    0.04    0.05
  27  -2  -1    3.06    0.12
 -27  -2   1    3.28    0.13
 -27   2   1    3.00    0.13
  27   2  -1    3.12    0.12
  26  -2  -1    0.07    0.04
 -26  -2   1    0.11    0.05
  26   2  -1    0.08    0.04
 -26   2   1    0.02    0.05
  25  -2  -1    4.50    0.15
 -25  -2   1    4.47    0.15
 -25   2   1    4.33    0.15
 -25   2   1    4.42    0.15
  25   2  -1    4.28    0.15
  24  -2  -1    2.73    0.11
 -24  -2   1    2.80    0.12
  24   2  -1    2.87    0.11
 -24   2   1    2.79    0.12
 -24   2   1    2.85    0.11
  23  -2  -1    0.12    0.04
 -23  -2   1    0.22    0.05
 -23   2   1    0.15    0.05
 -23   2   1    0.14    0.05
  23   2  -1    0.15    0.04
  22  -2  -1    1.23    0.07
 -22  -2   1    1.20    0.07
 -22   2   1    1.22    0.07
 -22   2   1    1.26    0.08
  22   2  -1    1.23    0.07
 -21  -2   1    2.53    0.10
  21  -2  -1    2.44    0.10
 -21   2   1    2.15    0.10
  21   2  -1    2.28    0.09
 -21   2   1    2.37    0.10
  20  -2  -1    0.11    0.04
 -20  -2   1    0.13    0.04
 -20   2   1    0.03    0.04
  20   2  -1    0.11    0.04
 -20   2   1    0.15    0.04
 -19  -2   1    1.85    0.08
  19  -2  -1    2.07    0.08
  19   2  -1    2.01    0.08
  19   2  -1    1.77    0.07
 -19   2   1    1.84    0.09
 -19   2   1    1.84    0.08
  18  -2  -1    0.02    0.03
 -18  -2   1    0.05    0.03
  18   2  -1    0.02    0.03
 -18   2   1    0.10    0.03
  18   2  -1    0.11    0.03
 -18   2   1    0.04    0.03
 -17  -2   1    0.04    0.02
 -17  -2   1    0.02    0.03
  17  -2  -1    0.02    0.03
  17   2  -1    0.00    0.03
  17   2  -1   -0.03    0.02
 -17   2   1   -0.04    0.03
 -17   2   1   -0.04    0.03
 -16  -2   1    2.95    0.10
  16  -2  -1    3.01    0.10
 -16  -2   1    2.97    0.09
 -16   2   1    2.89    0.10
  16   2  -1    2.96    0.09
  16   2  -1    2.69    0.09
 -16   2   1    3.03    0.10
 -15  -2   1    0.07    0.02
 -15  -2   1    0.12    0.03
  15  -2  -1    0.10    0.03
 -15   2   1    0.09    0.03
  15   2  -1    0.08    0.02
 -15   2   1    0.12    0.03
  15   2  -1    0.09    0.03
 -14  -2   1    0.27    0.02
  14  -2  -1    0.35    0.03
 -14  -2   1    0.28    0.04
  14   2  -1    0.30    0.03
  14   2  -1    0.23    0.03
 -14   2   1    0.23    0.03
 -14   2   1    0.30    0.04
 -13  -2   1   10.86    0.26
  13  -2  -1   10.33    0.25
 -13  -2   1   10.21    0.25
 -13   2   1    9.77    0.26
  13   2  -1   10.52    0.25
 -13   2   1   10.25    0.26
  13   2  -1   10.12    0.25
 -12  -2   1    0.07    0.02
  12  -2  -1    0.08    0.02
 -12  -2   1    0.08    0.02
  12   2  -1    0.05    0.02
 -12   2   1    0.08    0.02
  12   2  -1    0.07    0.02
 -12   2   1    0.08    0.03
 -11  -2   1    0.01    0.01
 -11  -2   1    0.02    0.02
  11  -2  -1    0.04    0.02
  11   2  -1   -0.07    0.02
 -11   2   1    0.00    0.02
  11   2  -1    0.01    0.02
 -11   2   1   -0.02    0.02
 -10  -2   1    0.61    0.03
  10  -2  -1    0.66    0.04
 -10  -2   1    0.66    0.04
  10   2  -1    0.55    0.04
 -10   2   1    0.57    0.04
 -10   2   1    0.53    0.04
  10   2  -1    0.59    0.04
   9  -2  -1    0.83    0.04
  -9  -2   1    0.85    0.04
  -9   2   1    0.93    0.05
   9   2  -1    0.78    0.04
   9   2  -1    0.87    0.04
  -9   2   1    0.87    0.05
  -8  -2   1    0.34    0.03
   8  -2  -1    0.37    0.03
   8   2  -1    0.28    0.03
   8   2  -1    0.31    0.02
  -8   2   1    0.33    0.03
   8   2  -1    0.31    0.03
  -8   2   1    0.25    0.03
   7  -2  -1    3.75    0.10
  -7  -2   1    3.62    0.10
   7   2  -1    3.71    0.10
   7   2  -1    3.57    0.10
  -7   2   1    3.61    0.10
   7   2  -1    3.86    0.09
  -7   2   1    3.63    0.10
   6  -2  -1    3.90    0.10
  -6  -2   1    3.80    0.10
  -6   2   1    3.56    0.10
  -6   2   1    3.85    0.09
  -6   2   1    3.77    0.10
   6   2  -1    3.80    0.09
   6   2  -1    3.50    0.10
   6   2  -1    3.91    0.10
   5  -2  -1    0.09    0.02
  -5  -2   1    0.05    0.02
  -5   2   1    0.07    0.01
   5   2  -1    0.06    0.02
  -5   2   1    0.05    0.02
  -5   2   1    0.05    0.02
   5   2  -1    0.05    0.02
  -4  -2   1   10.40    0.25
   4  -2  -1   10.26    0.24
   4   2  -1   10.77    0.24
   4   2  -1    9.64    0.24
  -4   2   1    9.91    0.25
  -4   2   1   10.76    0.24
  -4   2   1   10.30    0.25
   3  -2  -1   -0.03    0.01
  -3  -2   1   -0.02    0.01
  -3   2   1   -0.01    0.01
   3   2  -1   -0.02    0.01
  -3   2   1   -0.03    0.02
   3   2  -1   -0.02    0.01
   3   2  -1   -0.03    0.02
  -3   2   1   -0.05    0.01
  -2  -2   1    8.44    0.20
  -2   2   1    8.66    0.20
   2   2  -1    8.37    0.20
  -2   2   1    8.41    0.20
   2   2  -1    8.71    0.20
  -2   2   1    7.73    0.20
   2   2  -1    8.36    0.20
  -2   2   1    8.44    0.19
  -1  -2   1   11.68    0.28
   1   2  -1   10.90    0.27
  -1   2   1   12.07    0.28
   1   2  -1   11.85    0.27
  -1   2   1   11.91    0.27
   1   2  -1   11.08    0.27
  -1   2   1   11.72    0.27
  -1   2   1   11.54    0.27
   0   2   1    0.64    0.03
   0   2  -1    0.57    0.03
   0   2   1    0.53    0.03
   0   2  -1    0.67    0.03
   0   2  -1    0.59    0.03
   0   2   1    0.55    0.03
   0   2   1    0.61    0.03
   0   2  -1    0.59    0.03
  -1  -2  -1    2.96    0.07
  -1  -2  -1    2.72    0.08
  -1   2  -1    2.90    0.07
   1   2   1    2.77    0.08
  -1   2  -1    2.95    0.08
   1   2   1    2.94    0.07
  -1   2  -1    3.19    0.08
  -1   2  -1    2.96    0.08
  -2  -2  -1    0.28    0.02
  -2  -2  -1    0.38    0.03
  -2   2  -1    0.30    0.02
   2   2   1    0.36    0.03
   2   2   1    0.31    0.02
  -2   2  -1    0.28    0.03
  -2   2  -1    0.35    0.02
   3  -2   1    0.48    0.03
  -3  -2  -1    0.52    0.03
  -3  -2  -1    0.45    0.02
   3  -2   1    0.46    0.02
   3   2   1    0.47    0.03
   3   2   1    0.44    0.03
  -3   2  -1    0.49    0.03
  -3   2  -1    0.47    0.03
  -4  -2  -1    1.71    0.05
  -4  -2  -1    1.56    0.04
   4  -2   1    1.73    0.05
   4  -2   1    1.59    0.04
  -4   2  -1    1.69    0.05
   4   2   1    1.70    0.05
   4   2   1    1.57    0.05
  -4   2  -1    1.66    0.05
  -5  -2  -1    0.47    0.02
   5  -2   1    0.48    0.03
  -5  -2  -1    0.55    0.03
   5   2   1    0.55    0.03
   5   2   1    0.47    0.03
  -5   2  -1    0.46    0.03
  -5   2  -1    0.49    0.04
  -6  -2  -1    0.13    0.02
  -6  -2  -1    0.10    0.01
   6  -2   1    0.11    0.02
   6   2   1    0.09    0.02
   6   2   1    0.15    0.02
  -6   2  -1    0.12    0.02
  -6   2  -1    0.14    0.02
   7  -2   1    0.81    0.04
  -7  -2  -1    0.86    0.04
  -7  -2  -1    0.83    0.03
  -7   2  -1    0.74    0.04
   7   2   1    0.76    0.04
   7   2   1    0.82    0.04
  -7   2  -1    0.85    0.04
  -8  -2  -1    0.40    0.04
   8  -2   1    0.35    0.03
  -8  -2  -1    0.34    0.02
  -8   2  -1    0.35    0.03
  -8   2  -1    0.38    0.03
   8   2   1    0.31    0.03
   8   2   1    0.34    0.03
  -9  -2  -1    0.41    0.03
  -9  -2  -1    0.49    0.04
   9  -2   1    0.45    0.04
   9   2   1    0.36    0.03
   9   2   1    0.39    0.04
  -9   2  -1    0.37    0.03
  -9   2  -1    0.42    0.04
 -10  -2  -1   14.53    0.36
  10  -2   1   14.97    0.35
 -10  -2  -1   15.39    0.35
  10   2   1   15.13    0.35
 -10   2  -1   15.37    0.36
 -10   2  -1   14.08    0.36
  10   2   1   14.62    0.35
  11  -2   1    0.03    0.02
 -11  -2  -1    0.01    0.03
 -11  -2  -1   -0.02    0.02
  11   2   1    0.00    0.02
 -11   2  -1   -0.06    0.02
 -11   2  -1   -0.02    0.02
  11   2   1   -0.04    0.02
 -12  -2  -1    1.82    0.07
 -12  -2  -1    1.87    0.06
  12  -2   1    1.91    0.07
  12   2   1    1.83    0.07
  12   2   1    1.99    0.07
 -12   2  -1    2.05    0.08
 -12   2  -1    1.85    0.07
  13  -2   1    4.95    0.13
 -13  -2  -1    4.84    0.12
 -13  -2  -1    4.60    0.14
 -13   2  -1    4.85    0.14
 -13   2  -1    4.78    0.14
  13   2   1    4.60    0.13
  13   2   1    4.84    0.13
 -14  -2  -1    6.55    0.17
  14  -2   1    6.92    0.18
 -14  -2  -1    6.82    0.18
  14   2   1    6.53    0.17
  14   2   1    6.76    0.17
 -14   2  -1    6.69    0.18
 -14   2  -1    6.42    0.18
 -15  -2  -1    5.04    0.13
  15  -2   1    5.10    0.14
 -15  -2  -1    5.05    0.15
  15   2   1    5.21    0.14
 -15   2  -1    5.14    0.15
 -15   2  -1    5.25    0.15
  15   2   1    4.99    0.14
  16  -2   1    1.13    0.06
 -16  -2  -1    1.15    0.05
 -16  -2  -1    1.15    0.06
 -16   2  -1    1.17    0.06
 -16   2  -1    1.10    0.06
  16   2   1    1.10    0.06
  16   2   1    1.18    0.05
 -17  -2  -1    7.37    0.21
  17  -2   1    7.66    0.20
 -17   2  -1    7.68    0.21
  17   2   1    7.64    0.20
 -17   2  -1    7.60    0.21
  17   2   1    7.73    0.20
 -18  -2  -1   10.71    0.29
  18  -2   1   11.56    0.28
 -18   2  -1   11.28    0.29
 -18   2  -1   10.52    0.29
  18   2   1   11.24    0.27
  18   2   1   10.97    0.28
 -19  -2  -1    0.13    0.04
  19  -2   1    0.13    0.04
 -19   2  -1    0.08    0.04
  19   2   1    0.08    0.04
 -19   2  -1    0.12    0.04
  20  -2   1   12.55    0.32
 -20  -2  -1   12.18    0.33
 -20   2  -1   12.31    0.33
  20   2   1   12.99    0.32
 -20   2  -1   12.44    0.32
 -21  -2  -1    0.86    0.07
  21  -2   1    0.89    0.07
 -21   2  -1    0.81    0.07
  21   2   1    0.82    0.07
 -21   2  -1    0.84    0.07
  22  -2   1    3.53    0.12
 -22  -2  -1    3.70    0.13
  22   2   1    3.71    0.13
 -22   2  -1    3.83    0.13
 -22   2  -1    3.49    0.13
  23  -2   1    2.89    0.11
 -23  -2  -1    2.83    0.11
 -23   2  -1    2.62    0.11
 -23   2  -1    2.73    0.11
  23   2   1    2.54    0.11
 -24  -2  -1    4.84    0.16
  24  -2   1    4.94    0.15
 -24   2  -1    4.93    0.16
  24   2   1    4.63    0.15
 -24   2  -1    4.84    0.16
 -25  -2  -1    0.20    0.05
  25  -2   1    0.21    0.05
 -25   2  -1    0.19    0.05
 -25   2  -1    0.14    0.05
  25   2   1    0.20    0.05
 -26  -2  -1    8.39    0.24
  26  -2   1    8.09    0.23
 -26   2  -1    7.53    0.24
  26   2   1    8.21    0.23
  27  -2   1    1.05    0.08
 -27  -2  -1    1.03    0.08
  27   2   1    1.27    0.09
 -27   2  -1    1.15    0.09
 -28  -2  -1    0.25    0.06
  28  -2   1    0.17    0.06
 -28   2  -1    0.20    0.05
  28   2   1    0.22    0.05
 -29  -2  -1    0.74    0.08
  29  -2   1    0.71    0.07
  29   2   1    0.86    0.08
 -29   2  -1    0.68    0.08
  30  -2   1    0.41    0.06
 -30  -2  -1    0.26    0.06
 -30   2  -1    0.42    0.07
  30   2   1    0.39    0.06
 -31   2  -1    0.31    0.07
  31  -3  -1    1.07    0.09
 -31  -3   1    0.93    0.09
  31   3  -1    0.85    0.08
 -31   3   1    1.09    0.09
  30  -3  -1    2.74    0.12
 -30  -3   1    2.56    0.13
 -30   3   1    2.50    0.12
  30   3  -1    2.79    0.13
  29  -3  -1    0.31    0.06
 -29  -3   1    0.33    0.06
 -29   3   1    0.37    0.06
  29   3  -1    0.35    0.06
 -28  -3   1    0.83    0.08
  28  -3  -1    0.70    0.07
 -28   3   1    0.72    0.07
  28   3  -1    0.75    0.07
  27  -3  -1    3.10    0.12
 -27  -3   1    2.83    0.12
  27   3  -1    3.11    0.13
 -27   3   1    3.12    0.13
 -27   3   1    2.79    0.12
  26  -3  -1    0.31    0.05
 -26  -3   1    0.36    0.06
  26   3  -1    0.33    0.06
 -26   3   1    0.23    0.06
 -26   3   1    0.31    0.06
 -25  -3   1    0.83    0.08
  25  -3  -1    0.80    0.07
 -25   3   1    0.92    0.08
  25   3  -1    0.91    0.08
 -25   3   1    1.05    0.08
  24  -3  -1   12.79    0.33
 -24  -3   1   12.77    0.34
  24   3  -1   13.21    0.34
 -24   3   1   13.04    0.34
 -24   3   1   12.69    0.35
  23  -3  -1   14.71    0.37
 -23  -3   1   14.08    0.38
 -23   3   1   14.18    0.38
  23   3  -1   14.67    0.37
 -23   3   1   15.31    0.38
  22  -3  -1    2.71    0.10
 -22  -3   1    2.70    0.11
  22   3  -1    2.66    0.10
 -22   3   1    2.57    0.10
 -22   3   1    2.58    0.10
  21  -3  -1    8.78    0.23
 -21  -3   1    8.33    0.24
  21   3  -1    8.77    0.23
 -21   3   1    8.28    0.24
 -21   3   1    8.22    0.23
 -20  -3   1    3.33    0.12
  20  -3  -1    3.56    0.11
 -20   3   1    3.53    0.12
  20   3  -1    3.60    0.11
  20   3  -1    3.37    0.12
 -20   3   1    3.36    0.12
  19  -3  -1    7.35    0.20
 -19  -3   1    7.46    0.21
  19   3  -1    7.87    0.20
  19   3  -1    7.39    0.20
 -19   3   1    7.45    0.21
 -19   3   1    7.61    0.21
 -18  -3   1    0.05    0.03
  18  -3  -1    0.02    0.03
 -18   3   1    0.07    0.04
  18   3  -1    0.00    0.03
 -18   3   1    0.03    0.03
  18   3  -1    0.05    0.03
 -17  -3   1    3.07    0.11
  17  -3  -1    3.21    0.10
  17   3  -1    3.19    0.11
 -17   3   1    3.13    0.11
 -17   3   1    3.08    0.11
  17   3  -1    3.23    0.10
  16  -3  -1   26.25    0.60
 -16  -3   1   25.35    0.62
 -16   3   1   25.83    0.62
  16   3  -1   24.97    0.60
  16   3  -1   25.72    0.60
 -16   3   1   25.58    0.63
  15  -3  -1    0.21    0.03
 -15  -3   1    0.21    0.03
 -15   3   1    0.17    0.04
  15   3  -1    0.12    0.03
 -15   3   1    0.16    0.03
  15   3  -1    0.16    0.03
 -14  -3   1   11.57    0.29
  14  -3  -1   11.71    0.28
  14   3  -1   11.89    0.27
  14   3  -1   11.03    0.28
  14   3  -1   11.48    0.28
 -14   3   1   11.89    0.30
 -14   3   1   11.24    0.29
  13  -3  -1   32.90    0.76
 -13  -3   1   32.30    0.79
  13   3  -1   34.48    0.76
 -13   3   1   33.29    0.79
 -13   3   1   32.05    0.78
  13   3  -1   32.66    0.76
  13   3  -1   33.12    0.77
  12  -3  -1   94.76    2.18
 -12  -3   1   96.44    2.27
 -12   3   1   93.36    2.24
 -12   3   1   91.85    2.21
  12   3  -1   96.14    2.54
  12   3  -1  102.43    2.29
  12   3  -1   95.55    2.19
  11  -3  -1   43.47    1.00
 -11  -3   1   43.46    1.03
 -11   3   1   42.92    1.03
  11   3  -1   43.12    1.00
 -11   3   1   43.50    1.02
  11   3  -1   44.94    1.00
  11   3  -1   44.09    1.01
 -10  -3   1    2.99    0.09
  10  -3  -1    2.99    0.08
  10   3  -1    3.01    0.07
 -10   3   1    2.94    0.09
  10   3  -1    2.84    0.09
  10   3  -1    2.88    0.09
 -10   3   1    2.62    0.09
   9  -3  -1    9.15    0.23
  -9  -3   1    9.45    0.24
  -9   3   1    9.54    0.24
  -9   3   1    9.67    0.24
   9   3  -1    9.73    0.23
   9   3  -1    9.45    0.23
   8  -3  -1    0.22    0.02
  -8  -3   1    0.16    0.02
  -8   3   1    0.22    0.03
  -8   3   1    0.18    0.02
   8   3  -1    0.20    0.03
   8   3  -1    0.19    0.02
   7  -3  -1    3.85    0.10
  -7  -3   1    3.95    0.11
  -7   3   1    3.94    0.09
   7   3  -1    3.86    0.11
  -7   3   1    3.94    0.11
   7   3  -1    3.85    0.11
  -7   3   1    3.86    0.11
   6  -3  -1   11.41    0.27
  -6  -3   1   11.28    0.28
  -6   3   1   11.33    0.28
  -6   3   1   11.59    0.28
  -6   3   1   12.02    0.27
   6   3  -1   10.97    0.28
   6   3  -1   11.47    0.27
   5  -3  -1   41.64    0.97
  -5  -3   1   42.13    1.01
  -5   3   1   42.91    1.01
  -5   3   1   45.06    0.98
  -5   3   1   42.53    1.00
   5   3  -1   44.16    0.98
   5   3  -1   42.55    0.99
  -4  -3   1   19.47    0.46
   4  -3  -1   19.27    0.44
  -4   3   1   19.93    0.44
   4   3  -1   18.83    0.45
  -4   3   1   18.74    0.46
   4   3  -1   19.79    0.44
  -4   3   1   18.17    0.45
   4   3  -1   19.82    0.45
  -3  -3   1    0.01    0.01
   3   3  -1   -0.01    0.01
  -3   3   1    0.00    0.01
   3   3  -1    0.00    0.02
   3   3  -1   -0.01    0.02
  -3   3   1   -0.03    0.02
  -3   3   1   -0.02    0.02
  -2  -3   1   75.37    1.79
  -2   3   1   74.83    1.79
  -2   3   1   75.35    1.72
  -2   3   1   78.29    1.75
  -2   3   1   73.86    1.76
   2   3  -1   73.12    1.72
   2   3  -1   76.93    1.76
   2   3  -1   76.18    1.75
   1   3  -1  626.22   15.05
   1   3  -1  627.84   15.12
  -1   3   1  633.52   14.81
   1   3  -1  622.41   14.86
  -1   3   1  627.21   15.48
  -1   3   1  593.95   15.35
  -1   3   1  633.65   15.20
   0   3  -1  959.40   22.99
   0   3   1  917.71   22.89
   0   3   1  944.77   23.72
   0   3  -1  959.30   23.48
   0   3  -1  960.00   22.92
   0   3   1  977.79   22.61
   0   3  -1 1000.00   22.91
   0   3   1  979.98   23.01
  -1  -3  -1  153.06    3.58
   1   3   1  147.49    3.45
  -1   3  -1  151.51    3.45
  -1   3  -1  151.54    4.30
  -1   3  -1  155.96    3.57
  -1   3  -1  149.23    3.48
   1   3   1  153.74    4.30
  -2  -3  -1   47.34    1.06
  -2  -3  -1   45.96    1.08
  -2   3  -1   45.11    1.04
   2   3   1   45.29    1.05
  -2   3  -1   46.35    1.08
  -2   3  -1   46.43    1.05
   2   3   1   44.94    1.05
  -2   3  -1   45.18    1.06
  -3  -3  -1    0.05    0.01
  -3  -3  -1    0.07    0.02
   3   3   1    0.10    0.02
  -3   3  -1    0.07    0.01
  -3   3  -1    0.10    0.02
  -3   3  -1    0.06    0.02
   3   3   1    0.09    0.02
  -4  -3  -1    0.73    0.04
  -4  -3  -1    0.58    0.02
   4  -3   1    0.72    0.03
   4   3   1    0.73    0.04
  -4   3  -1    0.72    0.03
  -4   3  -1    0.71    0.04
   4   3   1    0.78    0.04
  -5  -3  -1   10.07    0.25
   5  -3   1    9.78    0.23
   5  -3   1   10.05    0.24
   5   3   1   10.26    0.24
  -5   3  -1    9.91    0.25
  -5   3  -1   10.08    0.25
  -6  -3  -1   96.61    2.27
   6  -3   1   97.55    2.19
   6  -3   1   93.69    2.18
   6   3   1   92.18    2.20
  -6   3  -1   93.91    2.20
   6   3   1   95.82    2.17
  -6   3  -1   98.26    2.27
   7  -3   1    0.78    0.04
   7  -3   1    0.69    0.02
  -7  -3  -1    0.77    0.04
  -7   3  -1    0.68    0.04
   7   3   1    0.75    0.04
  -7   3  -1    0.72    0.04
   7   3   1    0.76    0.04
  -8  -3  -1    0.35    0.03
  -8  -3  -1    0.30    0.02
   8  -3   1    0.31    0.03
  -8   3  -1    0.34    0.03
  -8   3  -1    0.32    0.03
   8   3   1    0.31    0.03
   8   3   1    0.30    0.03
  -9  -3  -1    1.18    0.04
  -9  -3  -1    1.16    0.05
   9  -3   1    1.14    0.05
  -9   3  -1    1.22    0.05
   9   3   1    1.18    0.05
  -9   3  -1    1.22    0.06
   9   3   1    1.20    0.05
  10  -3   1    1.21    0.05
 -10  -3  -1    1.10    0.03
 -10  -3  -1    1.10    0.05
  10   3   1    1.07    0.05
 -10   3  -1    0.96    0.05
  10   3   1    0.98    0.05
 -10   3  -1    0.99    0.05
  11  -3   1   64.77    1.48
 -11  -3  -1   62.63    1.53
 -11  -3  -1   66.48    1.50
 -11   3  -1   64.26    1.53
 -11   3  -1   65.91    1.51
  11   3   1   66.20    1.48
  11   3   1   65.52    1.49
 -12  -3  -1   28.05    0.69
 -12  -3  -1   29.37    0.66
  12  -3   1   29.13    0.66
 -12   3  -1   28.79    0.69
 -12   3  -1   28.32    0.68
  12   3   1   28.17    0.67
  12   3   1   29.05    0.67
  13  -3   1    7.90    0.20
 -13  -3  -1    7.92    0.19
 -13  -3  -1    7.94    0.21
 -13   3  -1    8.08    0.21
  13   3   1    8.22    0.21
  13   3   1    7.86    0.20
 -13   3  -1    8.16    0.21
 -14  -3  -1    3.12    0.10
 -14  -3  -1    3.26    0.09
  14  -3   1    3.14    0.10
  14   3   1    3.28    0.10
  14   3   1    3.28    0.10
 -14   3  -1    3.21    0.10
 -14   3  -1    3.26    0.11
  15  -3   1    7.59    0.19
 -15  -3  -1    7.25    0.20
 -15   3  -1    7.52    0.20
 -15   3  -1    7.14    0.20
  15   3   1    7.22    0.20
  15   3   1    7.68    0.19
 -16  -3  -1    0.56    0.05
  16  -3   1    0.60    0.05
 -16   3  -1    0.55    0.05
 -16   3  -1    0.53    0.05
  16   3   1    0.55    0.05
  16   3   1    0.60    0.05
 -17  -3  -1    1.12    0.06
  17  -3   1    1.26    0.07
 -17   3  -1    1.14    0.06
 -17   3  -1    1.24    0.07
  17   3   1    1.26    0.06
  17   3   1    1.14    0.07
 -18  -3  -1    7.95    0.22
  18  -3   1    7.66    0.20
 -18   3  -1    7.60    0.21
  18   3   1    7.65    0.21
  18   3   1    7.89    0.20
 -18   3  -1    7.53    0.21
  19  -3   1    0.01    0.03
 -19  -3  -1    0.07    0.04
  19   3   1    0.01    0.03
 -19   3  -1   -0.04    0.04
  19   3   1    0.04    0.03
 -19   3  -1   -0.03    0.03
  20  -3   1    8.90    0.23
 -20  -3  -1    8.60    0.24
 -20   3  -1    8.60    0.24
 -20   3  -1    8.70    0.24
  20   3   1    8.31    0.23
  21  -3   1    0.15    0.04
 -21  -3  -1    0.11    0.04
 -21   3  -1    0.02    0.04
  21   3   1    0.10    0.04
 -21   3  -1    0.09    0.04
  22  -3   1    1.50    0.08
 -22  -3  -1    1.54    0.09
 -22   3  -1    1.60    0.09
 -22   3  -1    1.46    0.08
  22   3   1    1.59    0.08
 -23  -3  -1    2.85    0.12
  23  -3   1    2.89    0.11
  23   3   1    2.54    0.11
 -23   3  -1    2.76    0.11
 -23   3  -1    2.92    0.12
 -24  -3  -1    3.40    0.13
  24  -3   1    3.83    0.13
 -24   3  -1    3.64    0.13
  24   3   1    3.56    0.13
 -24   3  -1    3.38    0.13
 -25  -3  -1    0.05    0.05
  25  -3   1    0.03    0.04
 -25   3  -1    0.12    0.05
 -25   3  -1    0.00    0.05
  25   3   1    0.03    0.04
 -26  -3  -1    0.11    0.05
  26  -3   1    0.14    0.05
 -26   3  -1    0.09    0.05
 -26   3  -1    0.07    0.05
  26   3   1    0.07    0.05
 -27  -3  -1    9.70    0.29
  27  -3   1   10.31    0.28
 -27   3  -1   10.10    0.29
  27   3   1   10.01    0.28
  28  -3   1    0.18    0.05
 -28  -3  -1    0.17    0.06
 -28   3  -1    0.24    0.06
  28   3   1    0.25    0.06
 -29  -3  -1    0.04    0.05
  29  -3   1    0.03    0.05
 -29   3  -1    0.10    0.05
  29   3   1    0.01    0.05
  30  -3   1    0.27    0.06
 -30  -3  -1    0.25    0.07
 -30   3  -1    0.35    0.07
  30   3   1    0.22    0.06
 -31   3  -1    0.19    0.07
  31  -4  -1    0.06    0.05
 -31   4   1    0.15    0.06
  30  -4  -1    0.24    0.06
 -30  -4   1    0.20    0.06
  30   4  -1    0.23    0.06
 -30   4   1    0.23    0.06
 -29  -4   1    0.20    0.06
  29  -4  -1    0.16    0.05
 -29   4   1    0.12    0.06
  29   4  -1    0.11    0.06
 -28  -4   1    1.83    0.10
  28  -4  -1    1.87    0.10
 -28   4   1    2.06    0.11
 -28   4   1    1.80    0.11
  28   4  -1    1.89    0.10
  27  -4  -1    0.57    0.06
 -27  -4   1    0.49    0.07
  27   4  -1    0.58    0.06
 -27   4   1    0.71    0.07
 -27   4   1    0.54    0.07
  26  -4  -1    0.84    0.07
 -26  -4   1    0.89    0.07
 -26   4   1    0.85    0.08
  26   4  -1    0.79    0.07
 -26   4   1    0.77    0.07
 -25  -4   1    0.38    0.06
  25  -4  -1    0.35    0.05
 -25   4   1    0.34    0.06
 -25   4   1    0.36    0.06
  25   4  -1    0.32    0.05
  24  -4  -1    0.22    0.05
 -24  -4   1    0.28    0.05
 -24   4   1    0.18    0.05
  24   4  -1    0.22    0.05
 -24   4   1    0.17    0.05
  23  -4  -1    1.24    0.07
 -23  -4   1    1.28    0.08
  23   4  -1    1.23    0.08
 -23   4   1    1.39    0.09
 -23   4   1    1.18    0.07
 -22  -4   1    1.20    0.08
  22  -4  -1    1.33    0.07
 -22   4   1    1.39    0.08
 -22   4   1    1.29    0.07
  22   4  -1    1.31    0.07
 -21  -4   1    2.71    0.11
  21  -4  -1    2.67    0.10
  21   4  -1    2.84    0.10
 -21   4   1    2.64    0.11
  21   4  -1    2.47    0.10
 -21   4   1    2.50    0.10
  20  -4  -1    0.01    0.03
 -20  -4   1    0.00    0.04
 -20   4   1    0.02    0.04
  20   4  -1    0.01    0.04
 -20   4   1    0.01    0.04
  20   4  -1   -0.01    0.03
 -19  -4   1    2.52    0.10
  19  -4  -1    2.46    0.09
 -19   4   1    2.34    0.09
  19   4  -1    2.42    0.09
  19   4  -1    2.29    0.10
 -19   4   1    2.34    0.10
  18  -4  -1    0.16    0.04
 -18  -4   1    0.14    0.04
  18   4  -1    0.13    0.03
 -18   4   1    0.08    0.04
  18   4  -1    0.16    0.04
 -18   4   1    0.15    0.04
 -17  -4   1    1.42    0.07
  17  -4  -1    1.37    0.07
 -17   4   1    1.24    0.07
 -17   4   1    1.28    0.07
  17   4  -1    1.37    0.07
  17   4  -1    1.44    0.07
  16  -4  -1    0.04    0.03
 -16  -4   1    0.03    0.03
 -16   4   1    0.00    0.03
  16   4  -1   -0.04    0.03
  16   4  -1    0.04    0.03
 -16   4   1   -0.02    0.03
 -15  -4   1   -0.02    0.03
  15  -4  -1    0.00    0.02
 -15   4   1    0.02    0.03
 -15   4   1   -0.02    0.03
  15   4  -1   -0.05    0.03
  15   4  -1    0.01    0.03
 -14  -4   1    0.30    0.04
  14  -4  -1    0.29    0.03
  14   4  -1    0.29    0.03
 -14   4   1    0.24    0.04
  14   4  -1    0.30    0.04
 -14   4   1    0.30    0.04
  13  -4  -1   13.37    0.31
 -13  -4   1   12.57    0.33
 -13   4   1   12.88    0.33
  13   4  -1   13.29    0.32
  13   4  -1   12.72    0.32
 -13   4   1   12.65    0.33
 -12  -4   1    0.81    0.05
  12  -4  -1    0.86    0.05
 -12   4   1    0.75    0.05
 -12   4   1    0.88    0.05
  12   4  -1    0.85    0.05
  12   4  -1    0.76    0.05
 -11  -4   1    0.05    0.02
  11  -4  -1    0.03    0.02
  11   4  -1    0.02    0.03
 -11   4   1    0.01    0.03
 -11   4   1    0.00    0.03
  11   4  -1    0.00    0.02
 -10  -4   1    0.43    0.04
  10  -4  -1    0.42    0.02
  10  -4  -1    0.43    0.04
  10   4  -1    0.43    0.03
  10   4  -1    0.36    0.03
 -10   4   1    0.39    0.04
 -10   4   1    0.46    0.04
   9  -4  -1    2.45    0.08
  -9  -4   1    2.62    0.08
  -9   4   1    2.40    0.08
  -9   4   1    2.38    0.08
   9   4  -1    2.50    0.08
   9   4  -1    2.44    0.08
  -8  -4   1    0.14    0.03
   8  -4  -1    0.16    0.02
   8   4  -1    0.15    0.03
  -8   4   1    0.13    0.02
   8   4  -1    0.12    0.03
  -8   4   1    0.10    0.03
  -8   4   1    0.11    0.02
  -7  -4   1   15.82    0.38
   7  -4  -1   15.63    0.37
  -7   4   1   15.87    0.38
  -7   4   1   16.34    0.37
   7   4  -1   15.54    0.38
  -7   4   1   15.26    0.38
   7   4  -1   15.62    0.37
   6  -4  -1    3.80    0.10
  -6  -4   1    4.01    0.11
   6   4  -1    4.14    0.11
   6   4  -1    4.12    0.11
  -6   4   1    3.86    0.11
  -6   4   1    4.02    0.10
  -6   4   1    4.02    0.12
   5  -4  -1   14.60    0.35
  -5  -4   1   15.12    0.36
  -5   4   1   14.59    0.36
   5   4  -1   15.03    0.35
  -5   4   1   15.95    0.35
   5   4  -1   14.94    0.35
   5   4  -1   15.11    0.36
  -5   4   1   14.32    0.36
   4  -4  -1   10.48    0.25
  -4  -4   1   10.85    0.27
   4   4  -1   10.84    0.25
  -4   4   1   10.91    0.27
  -4   4   1   11.20    0.26
   4   4  -1   11.36    0.26
  -4   4   1   10.36    0.27
   4   4  -1   10.55    0.26
  -3  -4   1   24.65    0.59
   3   4  -1   24.67    0.57
   3   4  -1   25.64    0.58
  -3   4   1   24.47    0.59
  -3   4   1   24.60    0.58
   3   4  -1   24.41    0.57
  -3   4   1   24.55    0.57
  -3   4   1   24.70    0.57
  -2  -4   1    0.64    0.03
  -2   4   1    0.54    0.04
   2   4  -1    0.58    0.03
  -2   4   1    0.65    0.04
  -2   4   1    0.61    0.04
   2   4  -1    0.62    0.03
  -2   4   1    0.62    0.04
   2   4  -1    0.55    0.04
   1   4  -1    2.11    0.07
   1   4  -1    1.99    0.06
  -1   4   1    1.89    0.06
  -1   4   1    2.15    0.06
  -1   4   1    1.99    0.07
   1   4  -1    2.05    0.06
  -1   4   1    2.01    0.06
   0   4   1    2.68    0.08
   0   4   1    2.67    0.08
   0   4  -1    2.72    0.08
   0   4  -1    2.75    0.08
   0   4  -1    2.77    0.08
   0   4   1    2.70    0.08
   0   4   1    2.66    0.08
   0   4  -1    2.54    0.08
   1   4   1   14.34    0.34
  -1   4  -1   14.73    0.34
   1   4   1   14.20    0.33
  -1   4  -1   14.53    0.35
  -1   4  -1   14.65    0.34
   1   4   1   13.93    0.34
  -1   4  -1   14.17    0.34
  -2  -4  -1    0.89    0.04
  -2  -4  -1    0.97    0.03
   2   4   1    0.85    0.04
  -2   4  -1    0.95    0.04
  -2   4  -1    0.93    0.04
  -2   4  -1    0.88    0.05
   2   4   1    0.92    0.04
  -2   4  -1    0.85    0.04
  -3  -4  -1    2.29    0.06
  -3  -4  -1    2.26    0.07
  -3   4  -1    2.37    0.07
   3   4   1    2.47    0.07
  -3   4  -1    2.28    0.07
  -3   4  -1    2.34    0.07
  -3   4  -1    2.41    0.07
   3   4   1    2.34    0.07
  -4  -4  -1    0.06    0.01
  -4  -4  -1    0.09    0.02
   4  -4   1    0.09    0.02
  -4   4  -1    0.05    0.02
  -4   4  -1    0.09    0.02
   4   4   1    0.05    0.02
  -4   4  -1    0.08    0.02
   4   4   1    0.08    0.02
   5  -4   1    0.01    0.02
  -5  -4  -1   -0.01    0.02
  -5  -4  -1   -0.01    0.01
  -5   4  -1   -0.01    0.02
   5   4   1    0.01    0.02
   5   4   1    0.00    0.02
  -5   4  -1    0.01    0.02
   6  -4   1    0.53    0.03
   6  -4   1    0.50    0.03
  -6  -4  -1    0.53    0.04
   6   4   1    0.57    0.04
  -6   4  -1    0.52    0.04
  -6   4  -1    0.49    0.04
   6   4   1    0.51    0.04
   7  -4   1    0.01    0.02
  -7  -4  -1    0.01    0.02
   7  -4   1    0.01    0.01
   7   4   1   -0.01    0.02
  -7   4  -1    0.02    0.03
   7   4   1    0.02    0.02
  -7   4  -1    0.01    0.02
  -8  -4  -1    1.36    0.06
   8  -4   1    1.25    0.04
   8  -4   1    1.28    0.05
  -8   4  -1    1.35    0.06
  -8   4  -1    1.31    0.06
   8   4   1    1.37    0.06
   8   4   1    1.37    0.06
  -9  -4  -1    9.32    0.25
   9  -4   1    9.68    0.22
   9  -4   1    9.82    0.24
  -9   4  -1    9.86    0.25
  -9   4  -1    9.57    0.25
   9   4   1    9.46    0.24
   9   4   1   10.02    0.24
 -10  -4  -1    1.86    0.07
  10  -4   1    1.75    0.06
 -10   4  -1    1.71    0.07
  10   4   1    1.76    0.07
  10   4   1    1.68    0.06
 -10   4  -1    1.73    0.07
 -11  -4  -1    5.26    0.15
  11  -4   1    5.39    0.14
 -11   4  -1    5.47    0.15
 -11   4  -1    5.33    0.15
  11   4   1    5.18    0.14
  11   4   1    5.66    0.15
  12  -4   1    0.38    0.03
 -12  -4  -1    0.40    0.04
 -12   4  -1    0.44    0.04
  12   4   1    0.40    0.04
  12   4   1    0.41    0.04
 -12   4  -1    0.36    0.04
 -13  -4  -1    0.14    0.03
  13  -4   1    0.13    0.03
  13   4   1    0.19    0.03
 -13   4  -1    0.17    0.03
  13   4   1    0.23    0.03
 -13   4  -1    0.18    0.04
  14  -4   1    2.14    0.08
 -14  -4  -1    2.25    0.08
  14   4   1    2.30    0.08
 -14   4  -1    2.31    0.08
  14   4   1    2.19    0.08
 -14   4  -1    2.18    0.09
  15  -4   1    4.83    0.14
 -15  -4  -1    5.12    0.15
 -15   4  -1    4.87    0.14
  15   4   1    4.91    0.14
  15   4   1    4.55    0.14
 -15   4  -1    4.72    0.15
  16  -4   1    0.51    0.04
 -16  -4  -1    0.47    0.05
 -16   4  -1    0.46    0.05
  16   4   1    0.45    0.04
  16   4   1    0.55    0.05
 -16   4  -1    0.44    0.04
  17  -4   1    2.21    0.09
 -17  -4  -1    2.42    0.10
 -17   4  -1    2.15    0.09
  17   4   1    2.31    0.09
 -17   4  -1    2.37    0.09
  17   4   1    2.36    0.09
 -18  -4  -1    0.04    0.04
  18  -4   1    0.00    0.03
 -18   4  -1   -0.05    0.03
  18   4   1   -0.04    0.03
  18   4   1    0.01    0.03
 -18   4  -1   -0.02    0.03
 -19  -4  -1    0.37    0.05
  19  -4   1    0.28    0.04
 -19   4  -1    0.24    0.04
  19   4   1    0.29    0.04
 -19   4  -1    0.31    0.05
  19   4   1    0.24    0.04
 -20  -4  -1    0.71    0.06
  20  -4   1    0.70    0.06
  20   4   1    0.61    0.05
  20   4   1    0.75    0.06
 -20   4  -1    0.70    0.06
 -20   4  -1    0.81    0.07
  21  -4   1    4.01    0.13
 -21  -4  -1    3.89    0.14
  21   4   1    3.81    0.13
 -21   4  -1    4.23    0.14
 -21   4  -1    3.91    0.14
 -22  -4  -1    1.24    0.08
  22  -4   1    1.43    0.07
 -22   4  -1    1.49    0.08
 -22   4  -1    1.46    0.09
  22   4   1    1.33    0.08
  23  -4   1    1.10    0.07
 -23  -4  -1    1.07    0.08
  23   4   1    1.11    0.07
 -23   4  -1    1.08    0.07
 -23   4  -1    1.04    0.08
 -24  -4  -1    0.40    0.06
  24  -4   1    0.36    0.05
  24   4   1    0.46    0.06
 -24   4  -1    0.47    0.06
 -24   4  -1    0.44    0.06
 -25  -4  -1    0.03    0.05
  25  -4   1    0.06    0.05
 -25   4  -1    0.03    0.05
  25   4   1    0.00    0.04
 -25   4  -1    0.03    0.04
  26  -4   1    0.05    0.05
 -26  -4  -1    0.07    0.05
  26   4   1    0.15    0.05
 -26   4  -1    0.06    0.05
 -26   4  -1    0.07    0.05
 -27  -4  -1    0.07    0.06
  27  -4   1    0.17    0.05
 -27   4  -1    0.14    0.05
 -27   4  -1    0.07    0.06
  27   4   1    0.12    0.05
  28  -4   1    1.91    0.10
 -28  -4  -1    1.90    0.11
 -28   4  -1    2.04    0.10
  28   4   1    1.96    0.11
 -28   4  -1    2.23    0.11
 -29  -4  -1   -0.12    0.05
  29  -4   1    0.00    0.05
 -29   4  -1   -0.01    0.05
  29   4   1    0.02    0.06
  30  -4   1    2.48    0.12
 -30  -4  -1    2.45    0.13
 -30   4  -1    2.48    0.12
  30   4   1    2.38    0.12
 -31   5   1    0.15    0.06
  30  -5  -1    3.70    0.14
 -30  -5   1    3.70    0.16
 -30   5   1    3.84    0.16
  30   5  -1    3.78    0.15
  29  -5  -1    4.31    0.15
 -29  -5   1    3.87    0.16
 -29   5   1    4.25    0.16
  29   5  -1    4.24    0.16
 -28  -5   1    3.55    0.14
  28  -5  -1    3.39    0.13
 -28   5   1    3.37    0.14
  28   5  -1    3.65    0.14
 -28   5   1    3.40    0.14
 -27  -5   1    1.91    0.11
  27  -5  -1    2.14    0.10
 -27   5   1    2.22    0.11
 -27   5   1    2.07    0.11
  27   5  -1    2.19    0.11
 -26  -5   1    1.62    0.10
  26  -5  -1    1.58    0.09
 -26   5   1    1.49    0.09
  26   5  -1    1.66    0.09
 -26   5   1    1.74    0.10
  25  -5  -1    0.45    0.06
 -25  -5   1    0.52    0.06
 -25   5   1    0.51    0.07
 -25   5   1    0.50    0.06
  25   5  -1    0.54    0.06
  24  -5  -1    5.38    0.17
 -24  -5   1    5.23    0.17
 -24   5   1    5.67    0.18
  24   5  -1    5.29    0.17
 -24   5   1    5.34    0.18
  23  -5  -1   14.33    0.35
 -23  -5   1   13.56    0.37
  23   5  -1   13.66    0.36
 -23   5   1   14.62    0.37
 -23   5   1   13.44    0.37
  22  -5  -1   16.63    0.42
 -22  -5   1   17.00    0.44
 -22   5   1   16.46    0.44
  22   5  -1   17.39    0.42
 -22   5   1   16.51    0.44
  22   5  -1   17.43    0.43
 -21  -5   1    0.43    0.06
  21  -5  -1    0.37    0.05
 -21   5   1    0.40    0.06
 -21   5   1    0.45    0.06
  21   5  -1    0.45    0.05
  21   5  -1    0.40    0.05
  20  -5  -1   10.07    0.26
 -20  -5   1   10.54    0.28
 -20   5   1    9.98    0.28
  20   5  -1   10.18    0.27
 -20   5   1   10.33    0.28
  20   5  -1   10.39    0.27
  19  -5  -1    1.14    0.06
 -19  -5   1    1.18    0.07
  19   5  -1    1.14    0.07
 -19   5   1    1.15    0.07
 -19   5   1    1.15    0.07
  19   5  -1    1.19    0.07
  18  -5  -1    1.32    0.06
 -18  -5   1    1.39    0.08
 -18   5   1    1.26    0.07
  18   5  -1    1.12    0.07
 -18   5   1    1.21    0.08
  18   5  -1    1.19    0.07
  17  -5  -1   10.11    0.25
 -17  -5   1   10.05    0.27
  17   5  -1   10.23    0.26
 -17   5   1    9.51    0.27
  17   5  -1   10.01    0.26
 -17   5   1    9.68    0.27
 -16  -5   1    2.46    0.09
  16  -5  -1    2.34    0.08
  16   5  -1    2.32    0.09
 -16   5   1    2.43    0.09
  16   5  -1    2.39    0.09
 -16   5   1    2.37    0.10
 -15  -5   1    4.18    0.13
  15  -5  -1    3.99    0.12
  15   5  -1    3.95    0.12
 -15   5   1    3.80    0.13
 -15   5   1    4.16    0.13
  15   5  -1    3.92    0.12
 -14  -5   1    1.41    0.07
  14  -5  -1    1.41    0.06
  14   5  -1    1.33    0.06
 -14   5   1    1.45    0.07
  14   5  -1    1.42    0.07
 -14   5   1    1.54    0.08
  13  -5  -1    8.02    0.21
 -13  -5   1    8.47    0.22
  13   5  -1    8.72    0.22
 -13   5   1    8.32    0.22
 -13   5   1    8.19    0.23
  13   5  -1    8.45    0.22
  12  -5  -1   17.97    0.42
 -12  -5   1   18.17    0.44
 -12   5   1   17.11    0.44
  12   5  -1   17.63    0.43
  12   5  -1   18.34    0.43
 -12   5   1   17.64    0.44
  11  -5  -1   14.33    0.34
 -11  -5   1   14.30    0.36
  11  -5  -1   14.07    0.33
 -11   5   1   14.28    0.36
 -11   5   1   14.43    0.36
  11   5  -1   14.59    0.35
  11   5  -1   14.04    0.35
 -10  -5   1    1.48    0.06
  10  -5  -1    1.50    0.06
 -10   5   1    1.40    0.07
 -10   5   1    1.52    0.06
  10   5  -1    1.49    0.07
  10   5  -1    1.39    0.06
   9  -5  -1    0.58    0.04
  -9  -5   1    0.67    0.05
   9   5  -1    0.60    0.04
   9   5  -1    0.59    0.05
  -9   5   1    0.61    0.05
  -9   5   1    0.58    0.03
  -9   5   1    0.57    0.05
  -8  -5   1   27.59    0.66
   8  -5  -1   27.19    0.63
  -8   5   1   26.30    0.65
   8   5  -1   27.35    0.64
  -8   5   1   28.12    0.63
   8   5  -1   27.95    0.64
  -8   5   1   27.53    0.66
  -7  -5   1    4.88    0.13
   7  -5  -1    4.91    0.13
  -7   5   1    4.62    0.14
  -7   5   1    5.01    0.12
   7   5  -1    4.67    0.13
   7   5  -1    5.03    0.14
  -7   5   1    4.74    0.13
   6  -5  -1    0.09    0.02
  -6  -5   1    0.11    0.01
  -6  -5   1    0.13    0.02
  -6   5   1    0.12    0.03
   6   5  -1    0.11    0.02
   6   5  -1    0.05    0.02
  -6   5   1    0.11    0.03
  -6   5   1    0.09    0.02
  -5  -5   1    2.99    0.09
   5  -5  -1    2.93    0.08
   5   5  -1    3.06    0.08
   5   5  -1    3.05    0.09
   5   5  -1    2.85    0.09
  -5   5   1    3.13    0.08
  -5   5   1    2.95    0.09
  -5   5   1    2.84    0.09
  -4  -5   1   34.89    0.85
   4   5  -1   34.81    0.82
  -4   5   1   35.00    0.85
  -4   5   1   37.24    0.82
  -4   5   1   35.49    0.82
  -4   5   1   36.04    0.84
   4   5  -1   35.54    0.82
   4   5  -1   36.89    0.83
  -3  -5   1   20.92    0.51
  -3   5   1   21.56    0.49
  -3   5   1   21.39    0.51
  -3   5   1   21.83    0.50
   3   5  -1   21.64    0.50
   3   5  -1   20.91    0.50
   3   5  -1   21.15    0.50
  -3   5   1   21.17    0.51
  -2  -5   1    8.29    0.21
  -2   5   1    8.08    0.21
  -2   5   1    8.08    0.20
  -2   5   1    8.08    0.20
   2   5  -1    7.94    0.20
  -2   5   1    8.59    0.20
   2   5  -1    8.08    0.20
   2   5  -1    7.99    0.20
  -1   5   1    0.95    0.04
   1   5  -1    0.88    0.05
  -1   5   1    0.83    0.04
   1   5  -1    1.01    0.05
   1   5  -1    0.84    0.04
  -1   5   1    0.87    0.05
  -1   5   1    0.96    0.04
   0   5   1    1.40    0.06
   0   5  -1    1.52    0.06
   0   5  -1    1.41    0.05
   0   5   1    1.39    0.05
   0   5  -1    1.41    0.05
   0   5   1    1.41    0.05
   0   5  -1    1.42    0.06
   0   5   1    1.37    0.05
   1   5   1   17.11    0.40
  -1   5  -1   17.04    0.41
  -1   5  -1   17.41    0.41
   1   5   1   17.33    0.41
  -1   5  -1   17.21    0.42
  -1   5  -1   17.65    0.41
   1   5   1   17.12    0.41
  -2  -5  -1    0.49    0.04
  -2   5  -1    0.47    0.04
  -2   5  -1    0.50    0.04
  -2   5  -1    0.51    0.04
   2   5   1    0.54    0.04
   2   5   1    0.48    0.04
  -2   5  -1    0.50    0.04
  -3  -5  -1   17.33    0.42
  -3  -5  -1   17.80    0.40
  -3   5  -1   17.00    0.40
   3   5   1   16.41    0.41
   3   5   1   17.26    0.40
  -3   5  -1   17.76    0.40
  -3   5  -1   16.76    0.42
  -3   5  -1   16.93    0.41
  -4  -5  -1   53.40    1.21
  -4  -5  -1   52.57    1.24
  -4   5  -1   51.88    1.22
  -4   5  -1   51.52    1.24
   4   5   1   52.17    1.19
   4   5   1   52.64    1.21
  -4   5  -1   52.28    1.20
  -4   5  -1   53.50    1.20
  -5  -5  -1   13.52    0.30
   5  -5   1   12.93    0.31
  -5  -5  -1   12.78    0.32
   5   5   1   12.94    0.31
   5   5   1   13.01    0.32
  -5   5  -1   13.01    0.32
  -5   5  -1   12.49    0.32
  -5   5  -1   13.28    0.31
  -6  -5  -1    9.88    0.25
   6  -5   1    9.88    0.24
  -6  -5  -1   10.25    0.23
   6   5   1   10.24    0.25
  -6   5  -1   10.05    0.25
  -6   5  -1    9.81    0.25
   6   5   1    9.82    0.25
  -7  -5  -1    9.06    0.23
   7  -5   1    8.59    0.21
   7  -5   1    9.21    0.22
   7   5   1    8.95    0.22
  -7   5  -1    9.16    0.23
   7   5   1    8.95    0.23
  -7   5  -1    8.67    0.23
   8  -5   1   37.20    0.86
   8  -5   1   37.45    0.86
  -8  -5  -1   36.97    0.89
  -8   5  -1   36.22    0.88
   8   5   1   38.48    0.87
   8   5   1   38.41    0.86
  -8   5  -1   38.08    0.89
  -9  -5  -1    6.87    0.19
   9  -5   1    7.14    0.18
   9  -5   1    6.90    0.17
   9   5   1    7.04    0.19
   9   5   1    7.19    0.18
  -9   5  -1    7.04    0.19
  -9   5  -1    7.01    0.19
 -10  -5  -1   17.57    0.43
  10  -5   1   17.15    0.40
  10  -5   1   17.30    0.41
  10   5   1   16.63    0.42
 -10   5  -1   17.19    0.43
 -10   5  -1   17.68    0.43
  10   5   1   17.73    0.41
  11  -5   1    7.98    0.21
 -11  -5  -1    8.30    0.22
  11   5   1    8.31    0.22
 -11   5  -1    8.07    0.22
 -11   5  -1    8.47    0.22
  11   5   1    8.30    0.21
  12  -5   1    3.29    0.10
 -12  -5  -1    3.32    0.11
 -12   5  -1    3.09    0.11
  12   5   1    3.52    0.11
  12   5   1    3.32    0.11
 -12   5  -1    3.63    0.11
  13  -5   1    0.22    0.03
 -13  -5  -1    0.24    0.04
 -13   5  -1    0.28    0.04
  13   5   1    0.25    0.03
 -13   5  -1    0.22    0.04
  13   5   1    0.23    0.04
 -14  -5  -1    0.98    0.06
  14  -5   1    0.88    0.06
  14   5   1    0.90    0.06
 -14   5  -1    0.91    0.06
  14   5   1    0.97    0.06
 -14   5  -1    0.98    0.06
  15  -5   1    3.00    0.10
 -15  -5  -1    3.15    0.11
 -15   5  -1    2.79    0.11
 -15   5  -1    3.28    0.11
  15   5   1    2.97    0.10
  15   5   1    3.24    0.10
 -16  -5  -1    2.53    0.10
  16  -5   1    2.32    0.09
  16   5   1    2.35    0.09
  16   5   1    2.34    0.09
 -16   5  -1    2.53    0.10
 -16   5  -1    2.44    0.10
  17  -5   1    2.18    0.08
 -17  -5  -1    2.26    0.10
 -17   5  -1    2.19    0.09
 -17   5  -1    2.24    0.09
  17   5   1    2.20    0.09
  17   5   1    2.21    0.09
  18  -5   1    3.22    0.11
 -18  -5  -1    3.32    0.12
  18   5   1    3.49    0.11
 -18   5  -1    3.46    0.12
 -18   5  -1    3.24    0.11
  18   5   1    3.20    0.11
 -19  -5  -1    4.42    0.15
  19  -5   1    4.50    0.14
 -19   5  -1    4.44    0.15
 -19   5  -1    4.69    0.15
  19   5   1    4.22    0.14
  19   5   1    4.68    0.14
 -20  -5  -1   14.93    0.38
  20  -5   1   14.32    0.36
 -20   5  -1   14.73    0.38
 -20   5  -1   14.52    0.38
  20   5   1   13.37    0.36
  20   5   1   14.24    0.36
 -21  -5  -1    5.52    0.17
  21  -5   1    5.71    0.17
 -21   5  -1    5.53    0.17
 -21   5  -1    5.52    0.18
  21   5   1    5.38    0.16
  21   5   1    5.46    0.17
  22  -5   1    0.42    0.05
 -22  -5  -1    0.52    0.06
 -22   5  -1    0.41    0.05
  22   5   1    0.49    0.06
 -22   5  -1    0.36    0.06
 -23  -5  -1    0.48    0.06
  23  -5   1    0.36    0.05
  23   5   1    0.41    0.06
 -23   5  -1    0.45    0.06
 -23   5  -1    0.47    0.06
  24  -5   1    6.90    0.20
 -24  -5  -1    6.92    0.21
 -24   5  -1    6.68    0.21
 -24   5  -1    6.79    0.21
  24   5   1    6.94    0.20
 -25  -5  -1    4.77    0.17
  25  -5   1    4.85    0.16
 -25   5  -1    5.20    0.18
 -25   5  -1    4.85    0.17
  25   5   1    4.94    0.17
  26  -5   1    7.28    0.22
 -26  -5  -1    7.73    0.23
 -26   5  -1    7.61    0.23
 -26   5  -1    7.20    0.23
  26   5   1    7.51    0.23
 -27  -5  -1    1.00    0.09
  27  -5   1    0.81    0.07
  27   5   1    0.96    0.09
 -27   5  -1    0.96    0.08
 -27   5  -1    0.90    0.08
 -28  -5  -1    0.06    0.06
  28  -5   1    0.05    0.05
  28   5   1    0.05    0.05
 -28   5  -1    0.11    0.06
 -28   5  -1    0.06    0.06
 -29  -5  -1    0.09    0.06
  29  -5   1    0.00    0.05
  29   5   1    0.10    0.06
 -29   5  -1    0.11    0.06
 -29   5  -1    0.06    0.06
 -30   5  -1    1.13    0.09
  31  -6  -1    0.07    0.07
  30  -6  -1    0.07    0.06
 -30   6   1    0.10    0.06
  29  -6  -1    2.56    0.12
 -29  -6   1    2.78    0.13
 -29   6   1    2.63    0.13
  29   6  -1    2.56    0.12
  28  -6  -1    3.14    0.13
 -28  -6   1    3.20    0.14
 -28   6   1    3.39    0.15
 -28   6   1    3.15    0.14
  28   6  -1    3.24    0.14
 -27  -6   1    1.30    0.09
  27  -6  -1    1.30    0.09
 -27   6   1    1.57    0.10
  27   6  -1    1.25    0.09
 -27   6   1    1.26    0.09
 -26  -6   1    0.59    0.07
  26  -6  -1    0.63    0.07
 -26   6   1    0.68    0.07
 -26   6   1    0.75    0.08
  26   6  -1    0.69    0.07
 -25  -6   1    0.10    0.05
  25  -6  -1    0.17    0.05
 -25   6   1    0.13    0.05
 -25   6   1    0.13    0.05
  25   6  -1    0.13    0.05
 -24  -6   1    3.36    0.13
  24  -6  -1    3.28    0.12
  24   6  -1    3.10    0.12
 -24   6   1    3.16    0.13
 -24   6   1    3.21    0.14
 -23  -6   1    0.08    0.05
  23  -6  -1    0.11    0.04
 -23   6   1    0.22    0.05
 -23   6   1    0.15    0.06
  23   6  -1    0.21    0.05
 -22  -6   1    0.02    0.05
  22  -6  -1    0.09    0.04
 -22   6   1    0.10    0.05
  22   6  -1    0.09    0.04
 -22   6   1    0.10    0.05
  22   6  -1    0.15    0.05
 -21  -6   1    0.27    0.05
  21  -6  -1    0.34    0.05
  21   6  -1    0.35    0.05
 -21   6   1    0.34    0.05
 -21   6   1    0.36    0.06
  21   6  -1    0.34    0.05
 -20  -6   1    0.26    0.05
  20  -6  -1    0.28    0.05
 -20   6   1    0.18    0.05
  20   6  -1    0.23    0.05
  20   6  -1    0.29    0.05
 -20   6   1    0.27    0.05
  19  -6  -1    0.22    0.04
 -19  -6   1    0.24    0.05
 -19   6   1    0.21    0.05
  19   6  -1    0.14    0.05
 -19   6   1    0.21    0.05
  19   6  -1    0.19    0.05
 -18  -6   1    4.81    0.15
  18  -6  -1    4.62    0.14
  18   6  -1    4.58    0.15
  18   6  -1    4.42    0.15
 -18   6   1    4.50    0.15
 -18   6   1    4.73    0.15
 -17  -6   1    0.71    0.07
  17  -6  -1    0.61    0.05
  17   6  -1    0.72    0.06
 -17   6   1    0.65    0.06
  17   6  -1    0.55    0.05
 -17   6   1    0.71    0.06
  16  -6  -1    0.12    0.03
 -16  -6   1    0.08    0.04
  16   6  -1    0.10    0.03
 -16   6   1    0.11    0.04
  16   6  -1    0.13    0.04
 -16   6   1    0.09    0.03
  15  -6  -1    0.67    0.05
 -15  -6   1    0.68    0.05
 -15   6   1    0.71    0.06
 -15   6   1    0.65    0.06
  15   6  -1    0.58    0.05
  15   6  -1    0.73    0.05
 -14  -6   1    0.97    0.06
  14  -6  -1    0.98    0.06
  14   6  -1    0.95    0.06
 -14   6   1    0.91    0.06
  14   6  -1    0.83    0.06
 -14   6   1    0.87    0.07
 -13  -6   1    2.96    0.10
  13  -6  -1    3.17    0.10
  13   6  -1    3.12    0.11
 -13   6   1    2.88    0.11
  13   6  -1    3.12    0.11
 -13   6   1    3.21    0.11
 -12  -6   1    0.07    0.03
  12  -6  -1    0.05    0.03
  12   6  -1    0.05    0.03
  12   6  -1   -0.06    0.03
 -12   6   1   -0.03    0.03
 -12   6   1    0.07    0.03
 -11  -6   1    1.86    0.07
  11  -6  -1    1.93    0.07
  11   6  -1    1.91    0.08
  11   6  -1    2.04    0.08
 -11   6   1    1.87    0.09
 -11   6   1    2.06    0.08
  10  -6  -1    5.23    0.14
 -10  -6   1    5.04    0.15
  10   6  -1    5.35    0.15
  10   6  -1    5.39    0.15
 -10   6   1    5.46    0.15
 -10   6   1    4.84    0.15
  -9  -6   1    0.05    0.03
   9  -6  -1    0.09    0.02
   9   6  -1    0.04    0.03
  -9   6   1    0.03    0.03
  -9   6   1    0.09    0.02
  -9   6   1    0.06    0.03
   9   6  -1    0.09    0.03
   8  -6  -1    1.09    0.05
  -8  -6   1    1.00    0.05
  -8   6   1    0.96    0.06
  -8   6   1    0.94    0.06
   8   6  -1    0.89    0.05
  -8   6   1    1.03    0.04
   8   6  -1    0.98    0.05
  -7  -6   1    0.48    0.02
   7  -6  -1    0.50    0.04
  -7  -6   1    0.47    0.04
   7   6  -1    0.48    0.04
  -7   6   1    0.47    0.04
  -7   6   1    0.46    0.04
  -7   6   1    0.48    0.04
   7   6  -1    0.55    0.05
   6  -6  -1   -0.01    0.02
  -6  -6   1    0.00    0.01
  -6  -6   1    0.01    0.02
   6   6  -1   -0.01    0.02
  -6   6   1   -0.01    0.02
  -6   6   1    0.01    0.02
   6   6  -1    0.02    0.03
  -6   6   1    0.01    0.02
  -5  -6   1    0.60    0.04
   5   6  -1    0.60    0.03
  -5   6   1    0.63    0.04
   5   6  -1    0.52    0.04
  -5   6   1    0.61    0.04
   5   6  -1    0.61    0.05
  -5   6   1    0.61    0.05
  -4  -6   1    0.38    0.03
  -4   6   1    0.42    0.04
   4   6  -1    0.40    0.03
  -4   6   1    0.37    0.04
   4   6  -1    0.46    0.04
  -4   6   1    0.33    0.03
  -4   6   1    0.40    0.04
   4   6  -1    0.34    0.03
  -3  -6   1    0.24    0.03
   3   6  -1    0.29    0.03
   3   6  -1    0.24    0.03
  -3   6   1    0.27    0.03
  -3   6   1    0.23    0.03
  -3   6   1    0.23    0.03
   3   6  -1    0.24    0.02
  -3   6   1    0.26    0.03
  -2  -6   1    2.48    0.08
  -2   6   1    2.44    0.08
   2   6  -1    2.41    0.08
  -2   6   1    2.41    0.08
  -2   6   1    2.48    0.08
   2   6  -1    2.35    0.07
   2   6  -1    2.22    0.08
  -2   6   1    2.39    0.08
  -1   6   1   -0.01    0.02
  -1   6   1    0.00    0.02
  -1   6   1   -0.04    0.02
   1   6  -1   -0.08    0.02
   1   6  -1   -0.03    0.02
   1   6  -1   -0.03    0.03
  -1   6   1   -0.02    0.02
   0   6   1    0.62    0.04
   0   6  -1    0.42    0.04
   0   6   1    0.49    0.04
   0   6  -1    0.54    0.04
   0   6  -1    0.54    0.04
   0   6   1    0.50    0.04
   0   6   1    0.53    0.04
   0   6  -1    0.43    0.04
  -1  -6  -1    0.06    0.02
  -1   6  -1    0.03    0.02
   1   6   1    0.03    0.02
  -1   6  -1   -0.01    0.02
   1   6   1    0.05    0.03
  -1   6  -1    0.04    0.02
  -1   6  -1    0.07    0.02
   1   6   1    0.06    0.02
  -2  -6  -1    0.13    0.03
  -2   6  -1    0.10    0.03
   2   6   1    0.09    0.03
  -2   6  -1    0.15    0.03
  -2   6  -1    0.16    0.03
   2   6   1    0.14    0.02
  -2   6  -1    0.13    0.03
  -3  -6  -1   -0.03    0.02
  -3  -6  -1   -0.04    0.02
  -3   6  -1   -0.03    0.02
  -3   6  -1    0.00    0.02
  -3   6  -1   -0.01    0.02
  -3   6  -1   -0.04    0.02
   3   6   1   -0.05    0.02
   3   6   1   -0.05    0.02
  -4  -6  -1    0.08    0.02
  -4  -6  -1    0.09    0.02
  -4   6  -1    0.05    0.02
   4   6   1    0.07    0.02
  -4   6  -1    0.07    0.02
  -4   6  -1    0.07    0.02
  -4   6  -1    0.05    0.02
   4   6   1    0.07    0.03
   5  -6   1    0.33    0.03
  -5  -6  -1    0.41    0.04
  -5  -6  -1    0.33    0.02
   5   6   1    0.33    0.03
  -5   6  -1    0.33    0.03
  -5   6  -1    0.34    0.03
  -5   6  -1    0.33    0.03
   5   6   1    0.34    0.03
  -6  -6  -1    0.04    0.02
  -6  -6  -1   -0.01    0.01
   6  -6   1    0.03    0.02
   6   6   1   -0.01    0.02
  -6   6  -1    0.00    0.02
  -6   6  -1   -0.01    0.02
   6   6   1    0.00    0.03
  -6   6  -1    0.01    0.03
  -7  -6  -1    0.13    0.01
   7  -6   1    0.16    0.03
   7  -6   1    0.05    0.02
  -7  -6  -1    0.13    0.03
   7   6   1    0.09    0.03
   7   6   1    0.17    0.03
  -7   6  -1    0.11    0.03
  -7   6  -1    0.14    0.03
   8  -6   1    1.72    0.06
  -8  -6  -1    1.83    0.07
   8  -6   1    1.93    0.07
   8   6   1    1.82    0.07
  -8   6  -1    1.96    0.07
   8   6   1    1.86    0.08
  -8   6  -1    1.79    0.08
  -9  -6  -1    0.18    0.03
   9  -6   1    0.24    0.03
   9  -6   1    0.24    0.02
   9   6   1    0.25    0.03
  -9   6  -1    0.18    0.03
  -9   6  -1    0.26    0.03
   9   6   1    0.23    0.04
  10  -6   1    0.46    0.03
 -10  -6  -1    0.60    0.05
  10  -6   1    0.65    0.05
  10   6   1    0.57    0.04
  10   6   1    0.55    0.05
 -10   6  -1    0.62    0.04
 -10   6  -1    0.45    0.05
  11  -6   1    5.12    0.14
 -11  -6  -1    5.40    0.15
  11   6   1    5.29    0.15
 -11   6  -1    5.35    0.15
  11   6   1    5.18    0.15
 -11   6  -1    5.05    0.15
 -12  -6  -1    0.33    0.04
  12  -6   1    0.26    0.03
  12   6   1    0.27    0.04
 -12   6  -1    0.28    0.04
 -12   6  -1    0.26    0.04
  12   6   1    0.23    0.04
 -13  -6  -1    0.08    0.03
  13  -6   1    0.12    0.03
 -13   6  -1    0.08    0.03
  13   6   1    0.11    0.03
 -13   6  -1    0.10    0.04
  13   6   1    0.11    0.04
  14  -6   1    0.16    0.03
 -14  -6  -1    0.16    0.04
  14   6   1    0.10    0.04
 -14   6  -1    0.20    0.04
 -14   6  -1    0.10    0.04
  14   6   1    0.17    0.04
  15  -6   1    0.14    0.04
 -15  -6  -1    0.15    0.04
  15   6   1    0.19    0.04
  15   6   1    0.15    0.04
 -15   6  -1    0.11    0.04
 -15   6  -1    0.18    0.04
 -16  -6  -1   -0.02    0.04
  16  -6   1   -0.04    0.03
  16   6   1    0.00    0.04
  16   6   1    0.02    0.03
 -16   6  -1   -0.05    0.04
 -16   6  -1    0.01    0.03
  17  -6   1    0.75    0.06
 -17  -6  -1    0.72    0.06
  17   6   1    0.83    0.06
  17   6   1    0.71    0.06
 -17   6  -1    0.64    0.06
 -17   6  -1    0.82    0.06
 -18  -6  -1    0.01    0.04
  18  -6   1    0.02    0.03
 -18   6  -1   -0.01    0.04
 -18   6  -1    0.06    0.04
  18   6   1    0.01    0.04
  18   6   1    0.00    0.04
  19  -6   1    4.05    0.13
 -19  -6  -1    4.25    0.14
  19   6   1    4.00    0.14
 -19   6  -1    4.16    0.15
  19   6   1    3.97    0.14
 -19   6  -1    4.11    0.14
 -20  -6  -1    5.08    0.16
  20  -6   1    4.84    0.15
  20   6   1    4.76    0.16
 -20   6  -1    4.82    0.16
  20   6   1    4.86    0.16
 -20   6  -1    4.97    0.16
  21  -6   1    1.72    0.09
 -21  -6  -1    1.64    0.09
 -21   6  -1    1.74    0.09
  21   6   1    1.78    0.09
  21   6   1    1.77    0.09
 -21   6  -1    1.62    0.09
 -22  -6  -1    0.49    0.06
  22  -6   1    0.44    0.05
 -22   6  -1    0.55    0.06
 -22   6  -1    0.46    0.07
  22   6   1    0.51    0.06
  22   6   1    0.51    0.06
  23  -6   1    0.07    0.05
 -23  -6  -1    0.08    0.05
 -23   6  -1    0.14    0.05
 -23   6  -1    0.05    0.05
  23   6   1    0.14    0.05
  24  -6   1    0.13    0.05
 -24  -6  -1    0.13    0.05
 -24   6  -1    0.18    0.06
 -24   6  -1    0.13    0.05
  24   6   1    0.09    0.05
 -25  -6  -1    0.05    0.05
  25  -6   1    0.08    0.05
  25   6   1   -0.01    0.05
 -25   6  -1    0.02    0.05
 -25   6  -1    0.03    0.05
 -26  -6  -1    1.25    0.09
  26  -6   1    1.41    0.09
 -26   6  -1    1.46    0.10
  26   6   1    1.34    0.09
 -26   6  -1    1.58    0.10
  27  -6   1    3.13    0.13
 -27  -6  -1    2.81    0.13
 -27   6  -1    3.01    0.13
 -27   6  -1    2.89    0.14
  27   6   1    3.05    0.13
 -28  -6  -1    5.69    0.19
  28  -6   1    5.64    0.18
 -28   6  -1    5.40    0.19
 -28   6  -1    5.51    0.19
  28   6   1    5.34    0.19
  29  -6   1    0.33    0.06
 -29   6  -1    0.47    0.07
  29   6   1    0.23    0.06
 -29   6  -1    0.40    0.07
 -30   6  -1    0.15    0.07
 -30   6  -1    0.09    0.06
  29  -7  -1    0.02    0.06
 -29   7   1    0.03    0.06
 -28  -7   1    1.33    0.10
  28  -7  -1    1.28    0.09
  28   7  -1    1.29    0.09
 -28   7   1    1.27    0.10
 -27  -7   1    0.37    0.07
  27  -7  -1    0.48    0.07
  27   7  -1    0.39    0.07
 -27   7   1    0.48    0.07
 -27   7   1    0.33    0.07
  26  -7  -1    1.80    0.10
 -26  -7   1    1.92    0.11
 -26   7   1    2.01    0.11
 -26   7   1    1.91    0.10
  26   7  -1    1.87    0.10
  25  -7  -1    0.08    0.05
 -25  -7   1    0.00    0.06
 -25   7   1    0.13    0.06
  25   7  -1    0.14    0.06
 -25   7   1    0.13    0.06
 -24  -7   1    3.38    0.14
  24  -7  -1    3.26    0.12
  24   7  -1    3.46    0.13
 -24   7   1    3.22    0.14
 -24   7   1    3.45    0.14
 -23  -7   1    1.68    0.10
  23  -7  -1    1.58    0.09
  23   7  -1    1.76    0.09
 -23   7   1    1.67    0.10
 -23   7   1    1.63    0.10
  23   7  -1    1.57    0.09
  22  -7  -1   18.78    0.46
 -22  -7   1   18.53    0.49
 -22   7   1   19.29    0.49
  22   7  -1   18.35    0.47
 -22   7   1   18.78    0.49
  22   7  -1   19.59    0.48
  21  -7  -1    4.63    0.15
 -21  -7   1    4.63    0.16
 -21   7   1    4.48    0.16
  21   7  -1    4.68    0.16
 -21   7   1    4.57    0.16
  21   7  -1    4.57    0.15
 -20  -7   1    0.06    0.04
  20  -7  -1   -0.04    0.04
  20   7  -1   -0.05    0.04
 -20   7   1   -0.01    0.05
 -20   7   1    0.02    0.04
  20   7  -1    0.00    0.04
 -19  -7   1    6.51    0.19
  19  -7  -1    6.36    0.18
 -19   7   1    5.84    0.19
  19   7  -1    6.18    0.18
 -19   7   1    6.53    0.19
  19   7  -1    6.09    0.19
 -18  -7   1    0.52    0.06
  18  -7  -1    0.57    0.05
  18   7  -1    0.50    0.05
 -18   7   1    0.44    0.06
  18   7  -1    0.40    0.05
 -18   7   1    0.45    0.05
  17  -7  -1    0.10    0.04
 -17  -7   1    0.09    0.04
  17   7  -1    0.02    0.04
 -17   7   1    0.02    0.04
 -17   7   1    0.16    0.04
  17   7  -1    0.08    0.04
 -16  -7   1    0.49    0.05
  16  -7  -1    0.45    0.04
 -16   7   1    0.43    0.05
  16   7  -1    0.41    0.05
 -16   7   1    0.48    0.05
  16   7  -1    0.47    0.05
  15  -7  -1    3.50    0.11
 -15  -7   1    3.44    0.12
 -15   7   1    3.36    0.13
  15   7  -1    3.44    0.12
 -15   7   1    3.60    0.12
  15   7  -1    3.16    0.12
  14  -7  -1    9.06    0.24
 -14  -7   1    9.40    0.25
 -14   7   1    9.49    0.25
 -14   7   1    9.45    0.26
  14   7  -1    9.26    0.25
  14   7  -1    9.21    0.25
  13  -7  -1   13.85    0.34
 -13  -7   1   13.85    0.35
  13   7  -1   13.92    0.35
 -13   7   1   14.06    0.36
  13   7  -1   13.41    0.35
 -13   7   1   14.03    0.36
 -12  -7   1    0.18    0.04
  12  -7  -1    0.16    0.03
  12   7  -1    0.20    0.04
  12   7  -1    0.14    0.04
 -12   7   1    0.14    0.04
 -12   7   1    0.22    0.04
  11  -7  -1    5.14    0.15
 -11  -7   1    5.27    0.15
 -11   7   1    5.48    0.16
 -11   7   1    5.51    0.16
  11   7  -1    5.23    0.16
  11   7  -1    5.39    0.16
 -10  -7   1    2.25    0.08
  10  -7  -1    2.23    0.08
 -10   7   1    2.24    0.07
 -10   7   1    2.31    0.09
  10   7  -1    2.37    0.09
 -10   7   1    2.27    0.09
  10   7  -1    2.36    0.09
  -9  -7   1    1.43    0.06
   9  -7  -1    1.47    0.06
  -9   7   1    1.47    0.06
   9   7  -1    1.36    0.07
   9   7  -1    1.45    0.07
  -9   7   1    1.47    0.07
  -9   7   1    1.41    0.07
  -8  -7   1   22.98    0.56
   8  -7  -1   22.66    0.54
  -8   7   1   24.37    0.54
   8   7  -1   22.68    0.55
  -8   7   1   22.60    0.57
  -8   7   1   23.96    0.56
   8   7  -1   22.53    0.55
   7  -7  -1    5.66    0.15
  -7  -7   1    5.74    0.14
  -7  -7   1    5.87    0.16
   7   7  -1    5.66    0.16
  -7   7   1    5.59    0.16
   7   7  -1    5.72    0.16
  -7   7   1    5.70    0.16
  -7   7   1    6.18    0.15
  -6  -7   1   12.73    0.30
   6  -7  -1   12.44    0.30
  -6  -7   1   12.68    0.32
  -6   7   1   12.32    0.32
  -6   7   1   12.45    0.32
   6   7  -1   12.51    0.31
  -6   7   1   13.06    0.31
   6   7  -1   12.45    0.32
  -5  -7   1   15.15    0.37
  -5   7   1   15.34    0.36
  -5   7   1   15.05    0.37
   5   7  -1   14.90    0.35
  -5   7   1   14.68    0.37
   5   7  -1   14.44    0.36
   5   7  -1   14.54    0.36
  -4  -7   1    4.66    0.13
   4   7  -1    4.58    0.13
  -4   7   1    4.58    0.13
   4   7  -1    4.52    0.12
  -4   7   1    4.67    0.14
  -4   7   1    4.46    0.13
   4   7  -1    4.43    0.13
  -4   7   1    4.58    0.13
  -3  -7   1   38.70    0.91
  -3   7   1   38.66    0.89
  -3   7   1   38.22    0.92
  -3   7   1   37.65    0.90
   3   7  -1   38.14    0.89
  -3   7   1   38.98    0.88
   3   7  -1   38.98    0.89
   3   7  -1   37.62    0.89
  -2  -7   1    7.29    0.19
  -2   7   1    7.29    0.19
   2   7  -1    7.14    0.19
  -2   7   1    7.18    0.19
   2   7  -1    7.34    0.19
  -2   7   1    7.32    0.20
   2   7  -1    7.03    0.18
  -2   7   1    7.25    0.19
  -1  -7   1    0.10    0.03
   1   7  -1    0.10    0.03
   1   7  -1    0.06    0.03
  -1   7   1    0.09    0.03
  -1   7   1    0.10    0.03
  -1   7   1    0.13    0.03
   0   7   1    6.26    0.17
   0   7   1    6.69    0.17
   0   7  -1    6.55    0.17
   0   7  -1    6.37    0.17
   0   7  -1    6.78    0.17
   0   7  -1    6.37    0.17
   0   7   1    6.27    0.18
   0   7   1    6.48    0.17
  -1  -7  -1   20.79    0.51
  -1   7  -1   20.78    0.49
   1   7   1   20.80    0.49
  -1   7  -1   21.09    0.49
  -1   7  -1   21.08    0.51
   1   7   1   20.72    0.50
  -1   7  -1   20.29    0.50
  -2  -7  -1    3.80    0.10
  -2  -7  -1    3.53    0.11
   2   7   1    3.70    0.11
  -2   7  -1    3.65    0.11
  -2   7  -1    3.53    0.11
  -2   7  -1    3.66    0.11
  -2   7  -1    3.72    0.11
   2   7   1    3.53    0.11
  -3  -7  -1   29.98    0.72
  -3  -7  -1   29.67    0.69
   3   7   1   29.15    0.69
  -3   7  -1   30.58    0.70
   3   7   1   29.02    0.70
  -3   7  -1   29.78    0.71
  -3   7  -1   30.29    0.69
  -3   7  -1   29.35    0.70
  -4  -7  -1    2.12    0.08
  -4  -7  -1    2.07    0.06
  -4   7  -1    1.97    0.08
  -4   7  -1    2.10    0.07
   4   7   1    2.04    0.08
  -4   7  -1    2.16    0.08
   4   7   1    2.03    0.07
  -4   7  -1    2.02    0.08
  -5  -7  -1    9.59    0.25
  -5  -7  -1   10.04    0.23
  -5   7  -1    9.70    0.25
  -5   7  -1    9.88    0.24
   5   7   1    9.83    0.25
   5   7   1    9.37    0.25
  -5   7  -1    9.78    0.25
   6  -7   1    9.31    0.24
  -6  -7  -1    9.59    0.23
  -6  -7  -1    9.37    0.25
   6   7   1    9.51    0.25
   6   7   1    9.67    0.24
  -6   7  -1    9.14    0.25
  -6   7  -1    9.54    0.25
  -6   7  -1    9.99    0.24
   7  -7   1    2.16    0.08
  -7  -7  -1    2.18    0.08
   7   7   1    2.06    0.08
  -7   7  -1    2.13    0.08
   7   7   1    2.22    0.08
  -7   7  -1    2.07    0.08
   8  -7   1   10.25    0.25
   8  -7   1   10.13    0.25
  -8  -7  -1   10.30    0.27
  -8   7  -1   10.24    0.27
   8   7   1    9.85    0.26
  -8   7  -1   10.21    0.27
   8   7   1   10.14    0.26
  -9  -7  -1    9.26    0.24
   9  -7   1    8.90    0.22
   9  -7   1    9.09    0.23
   9   7   1    8.87    0.24
  -9   7  -1    9.32    0.24
   9   7   1    9.31    0.24
  -9   7  -1    9.45    0.25
  10  -7   1    0.35    0.04
 -10  -7  -1    0.34    0.04
  10   7   1    0.31    0.04
  10   7   1    0.29    0.04
 -10   7  -1    0.32    0.04
 -10   7  -1    0.40    0.04
  11  -7   1    0.49    0.04
 -11  -7  -1    0.46    0.05
 -11   7  -1    0.49    0.05
  11   7   1    0.45    0.04
 -11   7  -1    0.45    0.04
  11   7   1    0.50    0.05
  12  -7   1    0.31    0.04
 -12  -7  -1    0.31    0.04
 -12   7  -1    0.29    0.05
  12   7   1    0.30    0.05
  12   7   1    0.27    0.04
 -12   7  -1    0.28    0.04
 -13  -7  -1    8.03    0.23
  13  -7   1    8.24    0.22
  13   7   1    8.11    0.22
  13   7   1    8.36    0.23
 -13   7  -1    8.49    0.23
 -13   7  -1    8.12    0.23
 -14  -7  -1   39.17    0.96
  14  -7   1   40.15    0.92
 -14   7  -1   39.41    0.95
  14   7   1   38.88    0.94
 -14   7  -1   40.98    0.96
  14   7   1   39.74    0.93
  15  -7   1    4.59    0.14
 -15  -7  -1    4.57    0.15
  15   7   1    4.49    0.14
 -15   7  -1    4.62    0.15
  15   7   1    4.53    0.14
 -15   7  -1    4.29    0.15
  16  -7   1    5.64    0.16
 -16  -7  -1    5.41    0.17
 -16   7  -1    5.75    0.17
  16   7   1    5.55    0.17
  16   7   1    5.57    0.17
 -16   7  -1    5.49    0.17
 -17  -7  -1    1.10    0.07
  17  -7   1    1.14    0.07
  17   7   1    1.12    0.08
 -17   7  -1    1.18    0.07
 -17   7  -1    1.32    0.08
  17   7   1    1.06    0.07
 -18  -7  -1    5.06    0.16
  18  -7   1    4.87    0.15
 -18   7  -1    5.41    0.17
  18   7   1    5.29    0.16
  18   7   1    5.39    0.16
 -18   7  -1    5.19    0.17
  19  -7   1    1.62    0.08
 -19  -7  -1    1.56    0.09
 -19   7  -1    1.73    0.09
 -19   7  -1    1.52    0.10
  19   7   1    1.71    0.08
  19   7   1    1.70    0.09
  20  -7   1    5.19    0.16
 -20  -7  -1    4.89    0.16
  20   7   1    4.77    0.16
  20   7   1    5.10    0.16
 -20   7  -1    5.27    0.17
 -20   7  -1    5.06    0.17
 -21  -7  -1    1.74    0.10
  21  -7   1    1.61    0.08
 -21   7  -1    1.61    0.10
  21   7   1    1.72    0.09
  21   7   1    1.72    0.09
 -21   7  -1    1.87    0.09
 -22  -7  -1    0.34    0.06
  22  -7   1    0.31    0.05
  22   7   1    0.40    0.06
 -22   7  -1    0.40    0.06
 -22   7  -1    0.46    0.07
  22   7   1    0.46    0.06
 -23  -7  -1    0.18    0.06
  23  -7   1    0.16    0.05
  23   7   1    0.26    0.06
 -23   7  -1    0.21    0.05
  23   7   1    0.23    0.06
 -23   7  -1    0.25    0.06
  24  -7   1    0.23    0.05
 -24  -7  -1    0.23    0.06
 -24   7  -1    0.20    0.06
  24   7   1    0.24    0.05
 -24   7  -1    0.17    0.06
 -25  -7  -1    2.93    0.13
  25  -7   1    3.07    0.12
  25   7   1    2.90    0.13
 -25   7  -1    2.81    0.12
 -25   7  -1    3.11    0.13
  26  -7   1    0.57    0.07
 -26  -7  -1    0.44    0.07
 -26   7  -1    0.59    0.07
 -26   7  -1    0.72    0.08
  26   7   1    0.53    0.07
 -27  -7  -1    2.51    0.13
  27  -7   1    2.83    0.13
  27   7   1    2.84    0.13
 -27   7  -1    2.86    0.13
 -27   7  -1    2.85    0.14
 -28  -7  -1    0.00    0.06
  28  -7   1   -0.02    0.06
 -28   7  -1    0.02    0.06
 -28   7  -1    0.12    0.06
  28   7   1    0.13    0.06
 -29   7  -1    0.25    0.07
 -29   7  -1    0.25    0.07
 -29   8   1    1.74    0.11
  28  -8  -1    1.76    0.11
 -28   8   1    1.92    0.12
  28   8  -1    1.94    0.12
 -27  -8   1    2.77    0.14
  27  -8  -1    2.74    0.12
  27   8  -1    2.72    0.13
 -27   8   1    2.96    0.14
 -27   8   1    2.83    0.13
 -26  -8   1    0.35    0.07
  26  -8  -1    0.31    0.06
  26   8  -1    0.41    0.06
 -26   8   1    0.36    0.06
 -26   8   1    0.43    0.07
  25  -8  -1    1.80    0.10
 -25  -8   1    1.49    0.10
  25   8  -1    1.83    0.11
 -25   8   1    1.88    0.11
 -25   8   1    1.80    0.11
  24  -8  -1    3.60    0.13
 -24  -8   1    3.57    0.14
 -24   8   1    3.64    0.15
  24   8  -1    3.53    0.14
 -24   8   1    3.77    0.15
  24   8  -1    3.60    0.14
 -23  -8   1    0.51    0.07
  23  -8  -1    0.63    0.06
 -23   8   1    0.68    0.08
 -23   8   1    0.63    0.07
  23   8  -1    0.65    0.07
  23   8  -1    0.57    0.07
 -22  -8   1    3.69    0.14
  22  -8  -1    3.55    0.13
 -22   8   1    3.71    0.14
  22   8  -1    3.83    0.14
  22   8  -1    3.57    0.14
 -22   8   1    3.80    0.15
 -21  -8   1    4.06    0.15
  21  -8  -1    4.03    0.14
 -21   8   1    3.92    0.16
  21   8  -1    3.94    0.15
 -21   8   1    4.07    0.15
  21   8  -1    4.02    0.15
  20  -8  -1   -0.04    0.04
 -20  -8   1   -0.03    0.04
  20   8  -1   -0.10    0.05
 -20   8   1    0.01    0.04
 -20   8   1   -0.07    0.05
  20   8  -1    0.00    0.04
 -19  -8   1   -0.01    0.05
  19  -8  -1   -0.01    0.04
  19   8  -1    0.05    0.04
  19   8  -1   -0.07    0.04
 -19   8   1    0.01    0.04
 -19   8   1   -0.01    0.05
 -18  -8   1    0.00    0.04
  18  -8  -1    0.00    0.04
  18   8  -1    0.07    0.04
 -18   8   1    0.02    0.05
  18   8  -1   -0.01    0.05
 -18   8   1    0.02    0.04
 -17  -8   1    0.66    0.06
  17  -8  -1    0.56    0.05
 -17   8   1    0.74    0.07
  17   8  -1    0.59    0.06
  17   8  -1    0.68    0.06
 -17   8   1    0.63    0.07
  16  -8  -1    2.21    0.09
 -16  -8   1    2.12    0.09
  16   8  -1    2.04    0.09
 -16   8   1    2.20    0.10
  16   8  -1    1.92    0.09
 -16   8   1    2.17    0.10
 -15  -8   1    1.92    0.09
  15  -8  -1    2.06    0.08
  15   8  -1    2.06    0.10
  15   8  -1    2.20    0.09
 -15   8   1    2.06    0.10
 -15   8   1    2.12    0.09
 -14  -8   1    0.68    0.06
  14  -8  -1    0.48    0.05
  14   8  -1    0.49    0.06
  14   8  -1    0.51    0.05
 -14   8   1    0.67    0.06
 -14   8   1    0.52    0.06
  13  -8  -1    1.37    0.06
 -13  -8   1    1.35    0.08
 -13   8   1    1.54    0.08
  13   8  -1    1.25    0.08
  13   8  -1    1.51    0.08
 -13   8   1    1.33    0.08
 -12  -8   1    2.24    0.09
  12  -8  -1    2.05    0.08
  12   8  -1    2.28    0.10
 -12   8   1    2.33    0.09
  12   8  -1    2.22    0.09
 -12   8   1    2.10    0.10
 -11  -8   1    2.15    0.09
  11  -8  -1    2.16    0.08
  11   8  -1    2.18    0.09
 -11   8   1    2.28    0.10
 -11   8   1    2.26    0.09
  11   8  -1    2.35    0.10
  10  -8  -1    4.08    0.12
 -10  -8   1    4.09    0.13
  10   8  -1    4.10    0.13
 -10   8   1    4.19    0.14
 -10   8   1    4.12    0.13
  10   8  -1    4.08    0.13
   9  -8  -1    0.32    0.03
  -9  -8   1    0.27    0.04
   9   8  -1    0.26    0.04
  -9   8   1    0.27    0.03
  -9   8   1    0.27    0.04
   9   8  -1    0.28    0.04
  -9   8   1    0.23    0.05
  -8  -8   1    0.99    0.06
   8  -8  -1    1.17    0.06
  -8   8   1    1.07    0.06
   8   8  -1    1.09    0.07
  -8   8   1    1.08    0.07
   8   8  -1    1.18    0.07
  -8   8   1    1.18    0.07
  -7  -8   1    0.93    0.06
   7  -8  -1    0.95    0.05
  -7   8   1    0.87    0.06
  -7   8   1    0.83    0.05
   7   8  -1    0.82    0.07
  -7   8   1    0.73    0.07
   7   8  -1    0.99    0.06
   6  -8  -1    0.25    0.03
  -6  -8   1    0.21    0.03
   6   8  -1    0.21    0.04
  -6   8   1    0.22    0.04
  -6   8   1    0.25    0.03
   6   8  -1    0.22    0.04
  -6   8   1    0.26    0.04
  -5  -8   1    0.02    0.03
  -5   8   1    0.00    0.03
  -5   8   1    0.04    0.03
   5   8  -1   -0.01    0.03
   5   8  -1   -0.03    0.03
  -5   8   1   -0.02    0.03
  -5   8   1   -0.06    0.03
  -4  -8   1    0.99    0.05
  -4   8   1    1.03    0.06
   4   8  -1    1.14    0.06
  -4   8   1    1.13    0.06
  -4   8   1    1.06    0.06
   4   8  -1    1.08    0.05
   4   8  -1    1.07    0.06
  -4   8   1    0.94    0.06
  -3  -8   1    5.01    0.15
  -3   8   1    4.66    0.14
  -3   8   1    5.23    0.15
   3   8  -1    5.22    0.15
  -3   8   1    5.07    0.14
   3   8  -1    5.04    0.14
   3   8  -1    5.02    0.14
  -3   8   1    4.93    0.14
  -2  -8   1    0.22    0.03
   2   8  -1    0.19    0.03
  -2   8   1    0.21    0.04
  -2   8   1    0.08    0.03
   2   8  -1    0.20    0.04
   2   8  -1    0.18    0.03
  -2   8   1    0.20    0.03
  -2   8   1    0.23    0.04
  -1  -8   1    4.21    0.13
   1   8  -1    4.15    0.13
  -1   8   1    4.03    0.12
   1   8  -1    4.17    0.13
  -1   8   1    4.14    0.13
  -1   8   1    4.40    0.13
  -1   8   1    4.21    0.12
   1   8  -1    4.23    0.12
   0   8   1    0.63    0.05
   0   8   1    0.71    0.05
   0   8  -1    0.70    0.05
   0   8   1    0.63    0.05
   0   8  -1    0.61    0.05
   0   8  -1    0.57    0.05
  -1  -8  -1    0.70    0.05
  -1   8  -1    0.67    0.06
  -1   8  -1    0.69    0.05
   1   8   1    0.76    0.05
  -1   8  -1    0.74    0.05
   1   8   1    0.58    0.05
  -1   8  -1    0.64    0.05
  -2  -8  -1    0.46    0.04
  -2  -8  -1    0.47    0.04
  -2   8  -1    0.44    0.04
  -2   8  -1    0.44    0.04
   2   8   1    0.48    0.04
   2   8   1    0.47    0.04
  -2   8  -1    0.41    0.04
  -2   8  -1    0.60    0.05
  -3  -8  -1    1.74    0.07
  -3  -8  -1    1.96    0.08
   3   8   1    1.74    0.07
  -3   8  -1    1.88    0.08
  -3   8  -1    1.90    0.08
  -3   8  -1    1.79    0.07
  -3   8  -1    1.84    0.08
   3   8   1    1.89    0.08
  -4  -8  -1    3.89    0.11
  -4  -8  -1    4.07    0.13
   4   8   1    4.03    0.12
  -4   8  -1    4.12    0.12
   4   8   1    3.94    0.13
  -4   8  -1    4.13    0.12
  -4   8  -1    3.81    0.12
  -4   8  -1    4.00    0.12
  -5  -8  -1    4.22    0.13
  -5   8  -1    4.47    0.13
   5   8   1    4.41    0.13
  -5   8  -1    4.57    0.14
  -5   8  -1    4.54    0.14
   5   8   1    4.45    0.14
  -6  -8  -1    2.10    0.09
   6  -8   1    2.03    0.08
  -6   8  -1    2.13    0.09
  -6   8  -1    2.28    0.08
   6   8   1    2.27    0.08
   6   8   1    2.25    0.09
  -6   8  -1    2.15    0.08
  -7  -8  -1    4.46    0.14
   7  -8   1    4.44    0.13
  -7   8  -1    4.47    0.14
   7   8   1    4.10    0.13
  -7   8  -1    4.55    0.14
   7   8   1    4.41    0.13
  -8  -8  -1    0.81    0.06
   8  -8   1    0.75    0.04
   8  -8   1    0.87    0.05
   8   8   1    0.74    0.05
  -8   8  -1    0.74    0.06
   8   8   1    0.87    0.06
  -8   8  -1    0.85    0.06
   9  -8   1    3.85    0.12
  -9  -8  -1    3.93    0.13
  -9   8  -1    3.91    0.13
  -9   8  -1    4.04    0.13
   9   8   1    3.82    0.12
   9   8   1    3.82    0.13
  10  -8   1    0.02    0.03
 -10  -8  -1   -0.02    0.03
 -10   8  -1    0.02    0.03
  10   8   1    0.01    0.03
  10   8   1   -0.02    0.04
 -10   8  -1   -0.03    0.03
  11  -8   1    0.83    0.06
 -11  -8  -1    0.89    0.06
  11   8   1    0.94    0.07
 -11   8  -1    0.87    0.06
  11   8   1    0.94    0.06
 -11   8  -1    1.04    0.07
  12  -8   1    4.93    0.14
 -12  -8  -1    4.83    0.15
 -12   8  -1    5.03    0.15
 -12   8  -1    5.00    0.16
  12   8   1    4.76    0.15
  12   8   1    4.99    0.15
 -13  -8  -1    1.87    0.09
  13  -8   1    1.78    0.08
 -13   8  -1    1.70    0.09
  13   8   1    1.76    0.08
 -13   8  -1    1.86    0.08
  13   8   1    1.83    0.08
  14  -8   1    1.81    0.08
 -14  -8  -1    1.80    0.08
 -14   8  -1    1.76    0.09
 -14   8  -1    1.85    0.09
  14   8   1    1.77    0.08
  14   8   1    1.75    0.09
  15  -8   1    0.67    0.06
 -15  -8  -1    0.62    0.06
  15   8   1    0.58    0.06
  15   8   1    0.63    0.06
 -15   8  -1    0.51    0.06
 -15   8  -1    0.66    0.06
  16  -8   1    1.59    0.08
 -16  -8  -1    1.64    0.08
  16   8   1    1.68    0.08
 -16   8  -1    1.69    0.09
 -16   8  -1    1.76    0.09
  16   8   1    1.64    0.09
  17  -8   1    0.01    0.04
 -17  -8  -1   -0.05    0.04
 -17   8  -1   -0.06    0.05
  17   8   1   -0.07    0.04
  17   8   1    0.03    0.04
 -17   8  -1    0.05    0.04
  18  -8   1    3.78    0.13
 -18  -8  -1    3.93    0.14
  18   8   1    3.75    0.14
  18   8   1    3.72    0.14
 -18   8  -1    3.98    0.15
 -18   8  -1    4.07    0.14
 -19  -8  -1    1.08    0.08
  19  -8   1    1.08    0.07
  19   8   1    0.91    0.08
 -19   8  -1    1.14    0.08
 -19   8  -1    0.94    0.08
  19   8   1    1.05    0.08
 -20  -8  -1    7.21    0.22
  20  -8   1    7.35    0.21
  20   8   1    7.51    0.22
  20   8   1    7.60    0.22
 -20   8  -1    7.74    0.23
 -20   8  -1    7.43    0.23
 -21  -8  -1    0.10    0.06
  21  -8   1    0.09    0.05
 -21   8  -1    0.16    0.05
  21   8   1    0.15    0.05
 -21   8  -1    0.20    0.06
  21   8   1    0.14    0.05
 -22  -8  -1    1.47    0.10
  22  -8   1    1.52    0.08
 -22   8  -1    1.44    0.10
  22   8   1    1.52    0.09
 -22   8  -1    1.70    0.10
  22   8   1    1.64    0.10
  23  -8   1    1.38    0.09
 -23  -8  -1    1.37    0.10
  23   8   1    1.48    0.09
 -23   8  -1    1.42    0.09
  23   8   1    1.46    0.09
 -23   8  -1    1.43    0.10
  24  -8   1    3.24    0.13
 -24  -8  -1    3.49    0.14
  24   8   1    3.36    0.14
 -24   8  -1    3.33    0.13
 -24   8  -1    3.23    0.14
 -25  -8  -1    0.58    0.08
  25  -8   1    0.56    0.07
 -25   8  -1    0.59    0.08
  25   8   1    0.69    0.07
 -25   8  -1    0.69    0.08
  26  -8   1    1.65    0.10
 -26  -8  -1    1.67    0.11
  26   8   1    1.83    0.10
 -26   8  -1    1.82    0.11
 -26   8  -1    1.75    0.12
  27  -8   1    0.33    0.07
 -27  -8  -1    0.30    0.07
  27   8   1    0.35    0.07
 -27   8  -1    0.40    0.08
 -27   8  -1    0.29    0.07
 -28   8  -1   -0.05    0.06
  28  -9  -1    0.16    0.06
 -28   9   1    0.09    0.06
  27  -9  -1    2.88    0.13
  27   9  -1    2.86    0.14
 -27   9   1    2.79    0.14
  26  -9  -1    0.14    0.06
 -26  -9   1    0.06    0.06
 -26   9   1    0.19    0.07
  26   9  -1    0.10    0.06
 -26   9   1    0.04    0.06
 -25  -9   1    0.08    0.06
  25  -9  -1    0.00    0.05
 -25   9   1    0.08    0.06
 -25   9   1    0.16    0.06
  25   9  -1    0.08    0.06
 -24  -9   1    3.24    0.14
  24  -9  -1    3.45    0.13
  24   9  -1    3.33    0.14
 -24   9   1    3.38    0.14
  24   9  -1    3.38    0.14
 -24   9   1    3.36    0.15
 -23  -9   1    0.35    0.07
  23  -9  -1    0.28    0.06
 -23   9   1    0.41    0.07
  23   9  -1    0.46    0.07
  23   9  -1    0.29    0.06
 -23   9   1    0.31    0.06
  22  -9  -1    1.03    0.08
 -22  -9   1    0.96    0.08
 -22   9   1    0.98    0.08
  22   9  -1    1.07    0.09
  22   9  -1    1.03    0.08
 -22   9   1    0.91    0.09
 -21  -9   1    0.11    0.06
  21  -9  -1   -0.01    0.05
 -21   9   1   -0.09    0.05
  21   9  -1    0.07    0.05
  21   9  -1   -0.04    0.05
 -21   9   1    0.05    0.05
 -20  -9   1    0.10    0.05
  20  -9  -1    0.06    0.04
 -20   9   1    0.06    0.05
  20   9  -1    0.06    0.05
 -20   9   1    0.00    0.06
  20   9  -1   -0.08    0.05
  19  -9  -1   -0.05    0.04
 -19  -9   1   -0.04    0.05
 -19   9   1    0.04    0.04
 -19   9   1   -0.04    0.05
  19   9  -1    0.00    0.05
  19   9  -1   -0.08    0.05
  18  -9  -1    9.63    0.26
 -18  -9   1    9.42    0.27
  18   9  -1    9.68    0.27
 -18   9   1    9.93    0.28
 -18   9   1    9.90    0.28
  18   9  -1    9.52    0.27
  17  -9  -1    0.01    0.04
 -17  -9   1   -0.03    0.04
 -17   9   1   -0.03    0.04
  17   9  -1   -0.03    0.05
 -17   9   1    0.01    0.04
  17   9  -1    0.00    0.04
  16  -9  -1    0.30    0.05
 -16  -9   1    0.26    0.05
 -16   9   1    0.17    0.05
  16   9  -1    0.35    0.05
  16   9  -1    0.34    0.05
 -16   9   1    0.27    0.05
 -15  -9   1    7.14    0.20
  15  -9  -1    6.86    0.19
 -15   9   1    6.94    0.21
  15   9  -1    6.88    0.20
  15   9  -1    6.78    0.21
 -15   9   1    6.95    0.21
  14  -9  -1    2.22    0.09
 -14  -9   1    2.15    0.10
  14   9  -1    2.41    0.11
 -14   9   1    2.27    0.10
 -14   9   1    2.15    0.10
  14   9  -1    2.25    0.10
 -13  -9   1    0.65    0.06
  13  -9  -1    0.76    0.06
 -13   9   1    0.70    0.07
 -13   9   1    0.75    0.07
  13   9  -1    0.70    0.06
  13   9  -1    0.65    0.06
  12  -9  -1    0.30    0.04
 -12  -9   1    0.26    0.05
  12   9  -1    0.33    0.05
  12   9  -1    0.26    0.05
 -12   9   1    0.28    0.05
 -12   9   1    0.31    0.05
 -11  -9   1    0.79    0.06
  11  -9  -1    0.85    0.06
 -11   9   1    0.76    0.06
  11   9  -1    0.86    0.07
  11   9  -1    0.81    0.07
 -11   9   1    0.82    0.07
 -10  -9   1    2.65    0.10
  10  -9  -1    2.73    0.09
  10   9  -1    2.62    0.10
 -10   9   1    2.52    0.11
 -10   9   1    2.71    0.10
  10   9  -1    2.67    0.11
   9  -9  -1    0.32    0.04
  -9  -9   1    0.29    0.04
  -9   9   1    0.36    0.05
  -9   9   1    0.33    0.05
   9   9  -1    0.36    0.04
   9   9  -1    0.28    0.05
   8  -9  -1    3.20    0.10
  -8  -9   1    3.37    0.11
  -8   9   1    3.14    0.12
  -8   9   1    3.41    0.10
   8   9  -1    3.20    0.12
  -8   9   1    3.10    0.11
   8   9  -1    3.25    0.11
   7  -9  -1    8.62    0.22
  -7  -9   1    8.57    0.23
  -7   9   1    9.18    0.23
  -7   9   1    8.71    0.24
   7   9  -1    8.62    0.23
   7   9  -1    8.49    0.24
  -7   9   1    8.60    0.24
   6  -9  -1    1.22    0.06
  -6  -9   1    1.27    0.07
  -6   9   1    1.10    0.07
   6   9  -1    1.14    0.07
  -6   9   1    1.25    0.07
   6   9  -1    1.29    0.07
  -6   9   1    1.08    0.07
  -5  -9   1    3.97    0.13
  -5   9   1    4.26    0.13
   5   9  -1    4.10    0.13
  -5   9   1    3.97    0.12
   5   9  -1    3.98    0.13
  -5   9   1    4.04    0.13
  -5   9   1    3.96    0.13
  -4  -9   1    5.40    0.16
  -4   9   1    5.17    0.16
   4   9  -1    5.26    0.16
  -4   9   1    5.59    0.15
  -4   9   1    5.44    0.15
   4   9  -1    5.35    0.16
  -4   9   1    5.44    0.16
  -3  -9   1    0.19    0.04
  -3   9   1    0.29    0.04
   3   9  -1    0.26    0.04
  -3   9   1    0.24    0.04
   3   9  -1    0.30    0.03
  -3   9   1    0.26    0.04
  -3   9   1    0.27    0.04
   3   9  -1    0.27    0.04
  -2  -9   1   15.11    0.38
  -2   9   1   14.90    0.39
   2   9  -1   15.57    0.38
   2   9  -1   14.60    0.37
  -2   9   1   15.20    0.38
  -2   9   1   15.28    0.37
   2   9  -1   15.40    0.37
  -2   9   1   15.33    0.38
  -1  -9   1    0.34    0.04
   1   9  -1    0.39    0.04
   1   9  -1    0.38    0.04
  -1   9   1    0.40    0.04
  -1   9   1    0.44    0.05
   1   9  -1    0.37    0.05
  -1   9   1    0.54    0.05
  -1   9   1    0.41    0.04
   0  -9   1    3.58    0.12
   0  -9  -1    3.47    0.12
   0   9  -1    3.54    0.12
   0   9  -1    3.51    0.11
   0   9   1    3.40    0.12
   0   9  -1    3.54    0.12
   0   9   1    3.63    0.12
  -1  -9  -1    1.75    0.07
  -1  -9  -1    1.88    0.08
  -1   9  -1    1.81    0.08
  -1   9  -1    1.95    0.08
   1   9   1    2.03    0.08
   1   9   1    1.76    0.08
  -1   9  -1    2.03    0.08
  -1   9  -1    1.94    0.08
  -2  -9  -1    1.65    0.08
  -2  -9  -1    1.80    0.07
   2   9   1    1.81    0.08
  -2   9  -1    1.55    0.08
  -2   9  -1    1.66    0.08
  -2   9  -1    1.71    0.08
  -2   9  -1    1.67    0.08
   2   9   1    1.61    0.07
  -3  -9  -1   24.20    0.60
  -3  -9  -1   24.37    0.58
   3   9   1   24.46    0.58
  -3   9  -1   24.26    0.59
  -3   9  -1   24.43    0.60
  -3   9  -1   24.95    0.58
  -3   9  -1   24.31    0.58
   3   9   1   23.52    0.58
  -4  -9  -1   41.13    1.00
  -4   9  -1   41.92    1.00
   4   9   1   41.91    0.97
  -4   9  -1   41.50    0.97
  -4   9  -1   43.01    0.97
   4   9   1   41.35    0.98
  -4   9  -1   41.49    0.99
  -5  -9  -1    3.23    0.11
   5   9   1    3.10    0.11
  -5   9  -1    3.13    0.11
  -5   9  -1    3.41    0.12
  -5   9  -1    3.30    0.11
   5   9   1    3.45    0.12
   6  -9   1   27.18    0.65
  -6  -9  -1   27.13    0.67
  -6   9  -1   26.93    0.67
   6   9   1   27.27    0.66
  -6   9  -1   27.74    0.67
   6   9   1   27.83    0.65
  -6   9  -1   29.12    0.65
   7  -9   1    1.17    0.06
  -7  -9  -1    1.28    0.07
  -7   9  -1    1.12    0.08
  -7   9  -1    1.30    0.07
   7   9   1    1.23    0.07
   7   9   1    1.25    0.07
  -8  -9  -1   13.42    0.35
   8  -9   1   13.41    0.34
   8   9   1   13.90    0.34
   8   9   1   13.53    0.35
  -8   9  -1   13.52    0.35
  -8   9  -1   14.06    0.35
  -9  -9  -1   12.84    0.34
   9  -9   1   12.80    0.32
  -9   9  -1   13.10    0.34
   9   9   1   12.61    0.33
  -9   9  -1   13.13    0.34
   9   9   1   13.42    0.33
 -10  -9  -1    5.06    0.16
  10  -9   1    4.74    0.14
  10   9   1    5.02    0.16
  10   9   1    5.27    0.15
 -10   9  -1    5.04    0.16
 -10   9  -1    5.09    0.16
  11  -9   1    0.75    0.06
 -11  -9  -1    0.70    0.06
 -11   9  -1    0.68    0.06
  11   9   1    0.76    0.06
  11   9   1    0.72    0.06
 -11   9  -1    0.75    0.07
 -12  -9  -1    0.12    0.04
  12  -9   1    0.10    0.04
 -12   9  -1    0.12    0.04
  12   9   1    0.13    0.04
 -12   9  -1    0.08    0.04
  12   9   1    0.09    0.04
  13  -9   1    0.55    0.05
 -13  -9  -1    0.70    0.06
 -13   9  -1    0.75    0.06
 -13   9  -1    0.68    0.07
  13   9   1    0.62    0.06
  13   9   1    0.68    0.06
 -14  -9  -1   16.37    0.42
  14  -9   1   16.23    0.41
 -14   9  -1   16.16    0.43
 -14   9  -1   16.85    0.43
  14   9   1   16.74    0.41
  14   9   1   16.51    0.42
  15  -9   1    0.00    0.03
 -15  -9  -1   -0.04    0.04
 -15   9  -1    0.05    0.05
  15   9   1    0.01    0.04
  15   9   1   -0.03    0.05
 -15   9  -1   -0.02    0.04
  16  -9   1    2.25    0.10
 -16  -9  -1    2.27    0.10
  16   9   1    2.57    0.10
 -16   9  -1    2.26    0.11
 -16   9  -1    2.53    0.11
  16   9   1    2.27    0.11
  17  -9   1    3.01    0.11
 -17  -9  -1    3.03    0.12
 -17   9  -1    2.99    0.13
 -17   9  -1    2.97    0.12
  17   9   1    3.14    0.12
  17   9   1    2.80    0.12
 -18  -9  -1    6.18    0.20
  18  -9   1    6.33    0.19
 -18   9  -1    6.33    0.21
 -18   9  -1    6.63    0.20
  18   9   1    6.30    0.20
  18   9   1    6.20    0.19
  19  -9   1    0.29    0.05
 -19  -9  -1    0.27    0.06
  19   9   1    0.23    0.05
 -19   9  -1    0.17    0.06
 -19   9  -1    0.37    0.06
  19   9   1    0.24    0.06
 -20  -9  -1    3.46    0.13
  20  -9   1    3.44    0.12
  20   9   1    3.37    0.14
  20   9   1    3.47    0.13
 -20   9  -1    3.46    0.14
 -20   9  -1    3.35    0.14
  21  -9   1    0.62    0.06
 -21  -9  -1    0.62    0.07
 -21   9  -1    0.45    0.07
 -21   9  -1    0.60    0.06
  21   9   1    0.55    0.07
  21   9   1    0.58    0.07
 -22  -9  -1    1.37    0.10
  22  -9   1    1.27    0.09
 -22   9  -1    1.63    0.10
  22   9   1    1.56    0.10
  22   9   1    1.53    0.10
 -22   9  -1    1.41    0.10
 -23  -9  -1    2.79    0.13
  23  -9   1    2.80    0.12
  23   9   1    2.52    0.12
 -23   9  -1    2.83    0.13
  23   9   1    2.81    0.13
 -23   9  -1    2.70    0.14
  24  -9   1    6.60    0.20
 -24  -9  -1    6.38    0.21
 -24   9  -1    6.48    0.21
  24   9   1    6.63    0.21
 -24   9  -1    6.57    0.22
  24   9   1    6.50    0.21
 -25  -9  -1    2.02    0.12
  25  -9   1    1.93    0.11
  25   9   1    2.10    0.11
 -25   9  -1    1.94    0.11
 -25   9  -1    2.00    0.13
  26  -9   1    0.06    0.05
  26   9   1    0.08    0.05
  27 -10  -1   -0.03    0.05
  26 -10  -1    3.71    0.14
 -26  10   1    3.28    0.15
 -25 -10   1    0.05    0.06
  25 -10  -1    0.21    0.06
 -25  10   1    0.19    0.06
 -25  10   1    0.14    0.06
  25  10  -1    0.18    0.06
 -24 -10   1   -0.01    0.06
  24 -10  -1    0.00    0.05
  24  10  -1    0.10    0.06
  24  10  -1   -0.04    0.06
 -24  10   1   -0.03    0.05
 -24  10   1    0.04    0.06
  23 -10  -1    0.59    0.07
 -23 -10   1    0.62    0.07
  23  10  -1    0.52    0.07
 -23  10   1    0.68    0.08
  23  10  -1    0.66    0.08
 -23  10   1    0.68    0.08
  22 -10  -1    1.40    0.09
 -22 -10   1    1.59    0.10
 -22  10   1    1.64    0.11
 -22  10   1    1.63    0.10
  22  10  -1    1.43    0.10
  22  10  -1    1.49    0.10
  21 -10  -1    0.51    0.06
 -21 -10   1    0.41    0.07
 -21  10   1    0.46    0.07
 -21  10   1    0.48    0.08
  21  10  -1    0.48    0.07
  21  10  -1    0.35    0.07
  20 -10  -1    9.29    0.25
 -20 -10   1    9.42    0.27
  20  10  -1    9.27    0.27
 -20  10   1    9.30    0.27
  20  10  -1    9.12    0.27
 -20  10   1    9.38    0.28
  19 -10  -1    0.08    0.05
 -19 -10   1    0.06    0.05
  19  10  -1   -0.02    0.06
  19  10  -1    0.13    0.05
 -19  10   1    0.12    0.05
 -19  10   1    0.03    0.06
  18 -10  -1    1.07    0.07
 -18 -10   1    0.95    0.07
 -18  10   1    1.21    0.09
  18  10  -1    1.06    0.08
 -18  10   1    0.93    0.09
  18  10  -1    0.82    0.08
  17 -10  -1    3.81    0.13
 -17 -10   1    3.68    0.13
  17  10  -1    3.71    0.14
 -17  10   1    3.98    0.15
  17  10  -1    3.82    0.15
 -17  10   1    3.65    0.15
 -16 -10   1    0.25    0.05
  16 -10  -1    0.14    0.04
 -16  10   1    0.25    0.05
  16  10  -1    0.28    0.05
 -16  10   1    0.28    0.06
  16  10  -1    0.17    0.05
  15 -10  -1    2.47    0.10
 -15 -10   1    2.61    0.11
 -15  10   1    2.52    0.12
  15  10  -1    2.74    0.11
 -15  10   1    2.81    0.12
  15  10  -1    2.46    0.11
 -14 -10   1    7.78    0.23
  14 -10  -1    8.00    0.21
 -14  10   1    8.02    0.23
  14  10  -1    7.71    0.23
  14  10  -1    7.98    0.23
 -14  10   1    7.83    0.24
  13 -10  -1    1.01    0.06
 -13 -10   1    0.92    0.07
 -13  10   1    1.05    0.08
  13  10  -1    0.81    0.07
 -13  10   1    0.83    0.08
  13  10  -1    0.94    0.07
  12 -10  -1    0.34    0.04
 -12 -10   1    0.36    0.05
  12  10  -1    0.32    0.05
 -12  10   1    0.27    0.06
  12  10  -1    0.43    0.06
 -12  10   1    0.36    0.05
  11 -10  -1    5.44    0.16
 -11 -10   1    5.27    0.16
  11  10  -1    5.38    0.17
  11  10  -1    5.59    0.17
 -11  10   1    5.30    0.18
 -11  10   1    5.80    0.17
 -10 -10   1    0.62    0.06
  10 -10  -1    0.78    0.06
 -10  10   1    0.68    0.07
  10  10  -1    0.57    0.06
 -10  10   1    0.66    0.06
  10  10  -1    0.56    0.06
   9 -10  -1    0.19    0.04
  -9 -10   1    0.17    0.04
   9  10  -1    0.16    0.04
  -9  10   1    0.14    0.05
  -9  10   1    0.15    0.04
   9  10  -1    0.07    0.05
   8 -10  -1    0.24    0.04
  -8 -10   1    0.22    0.04
   8  10  -1    0.21    0.04
   8  10  -1    0.19    0.05
  -8  10   1    0.18    0.05
  -8  10   1    0.27    0.05
   7 -10  -1    0.44    0.04
  -7 -10   1    0.44    0.05
   7  10  -1    0.41    0.06
  -7  10   1    0.44    0.06
  -7  10   1    0.38    0.05
  -7  10   1    0.45    0.05
   7  10  -1    0.39    0.05
   6 -10  -1    0.41    0.04
  -6 -10   1    0.35    0.04
  -6  10   1    0.41    0.05
   6  10  -1    0.33    0.05
  -6  10   1    0.36    0.05
  -6  10   1    0.40    0.05
   6  10  -1    0.44    0.05
  -5 -10   1    1.32    0.07
  -5  10   1    1.36    0.08
   5  10  -1    1.32    0.08
  -5  10   1    1.31    0.08
   5  10  -1    1.39    0.08
  -5  10   1    1.48    0.07
  -4 -10   1    2.15    0.09
   4  10  -1    2.19    0.10
  -4  10   1    2.34    0.09
  -4  10   1    2.29    0.09
  -4  10   1    2.28    0.09
  -4  10   1    2.22    0.09
   4  10  -1    2.12    0.09
  -3 -10   1    0.82    0.07
  -3  10   1    0.97    0.07
  -3  10   1    0.94    0.07
  -3  10   1    0.95    0.07
  -3  10   1    1.04    0.06
   3  10  -1    0.94    0.07
   3  10  -1    1.06    0.07
  -2 -10   1    8.22    0.22
   2  10  -1    8.08    0.22
  -2  10   1    8.08    0.21
  -2  10   1    8.21    0.23
   2  10  -1    7.88    0.22
  -2  10   1    7.79    0.22
   2  10  -1    7.94    0.21
  -2  10   1    7.86    0.22
  -1 -10   1    1.79    0.08
  -1  10   1    1.74    0.09
   1  10  -1    1.69    0.08
  -1  10   1    1.65    0.08
   1  10  -1    1.82    0.08
   1  10  -1    1.68    0.08
   0 -10   1    2.23    0.09
   0 -10  -1    2.19    0.09
   0 -10  -1    2.36    0.09
   0  10   1    2.39    0.09
   0  10  -1    2.23    0.09
   0  10  -1    2.23    0.09
   0  10  -1    2.21    0.10
   0  10   1    2.21    0.10
  -1 -10  -1    0.21    0.04
  -1 -10  -1    0.13    0.04
   1  10   1    0.24    0.04
  -1  10  -1    0.15    0.04
  -1  10  -1    0.16    0.04
   1  10   1    0.18    0.05
  -1  10  -1    0.18    0.04
  -2 -10  -1    0.91    0.06
   2  10   1    0.87    0.07
  -2  10  -1    0.87    0.07
  -2  10  -1    0.91    0.07
  -2  10  -1    0.95    0.06
  -2  10  -1    0.96    0.07
   2  10   1    0.84    0.07
  -3 -10  -1   -0.02    0.03
  -3  10  -1   -0.01    0.03
   3  10   1   -0.03    0.03
   3  10   1    0.04    0.04
  -3  10  -1   -0.01    0.04
  -3  10  -1   -0.05    0.04
  -3  10  -1   -0.02    0.04
  -4 -10  -1    2.70    0.11
   4  10   1    2.80    0.10
  -4  10  -1    2.78    0.11
  -4  10  -1    2.73    0.10
  -4  10  -1    2.90    0.10
  -4  10  -1    2.79    0.11
   4  10   1    2.79    0.11
  -5 -10  -1    6.59    0.19
   5  10   1    6.55    0.19
   5  10   1    6.48    0.19
  -5  10  -1    6.63    0.19
  -5  10  -1    6.68    0.19
  -5  10  -1    6.54    0.18
  -6 -10  -1    0.58    0.05
   6 -10   1    0.60    0.05
   6  10   1    0.56    0.05
  -6  10  -1    0.57    0.05
   6  10   1    0.57    0.06
  -6  10  -1    0.55    0.06
  -7 -10  -1    1.97    0.09
   7 -10   1    1.86    0.08
   7 -10   1    1.80    0.08
   7  10   1    2.00    0.09
  -7  10  -1    2.15    0.10
  -7  10  -1    2.10    0.09
   7  10   1    1.94    0.09
   8 -10   1    0.40    0.04
  -8 -10  -1    0.38    0.05
  -8  10  -1    0.27    0.05
   8  10   1    0.41    0.05
  -8  10  -1    0.41    0.05
   8  10   1    0.42    0.06
   9 -10   1    0.38    0.04
  -9 -10  -1    0.36    0.05
   9  10   1    0.38    0.05
  -9  10  -1    0.31    0.05
   9  10   1    0.36    0.05
  -9  10  -1    0.29    0.05
 -10 -10  -1    7.44    0.22
  10 -10   1    7.36    0.21
  10  10   1    7.53    0.22
 -10  10  -1    7.83    0.22
  10  10   1    7.61    0.21
 -10  10  -1    7.66    0.22
 -11 -10  -1    1.74    0.09
  11 -10   1    1.78    0.08
 -11  10  -1    1.79    0.09
 -11  10  -1    1.65    0.10
  11  10   1    1.72    0.09
  11  10   1    1.94    0.09
 -12 -10  -1    0.19    0.04
  12 -10   1    0.20    0.04
 -12  10  -1    0.20    0.05
 -12  10  -1    0.27    0.05
  12  10   1    0.25    0.05
  12  10   1    0.17    0.05
  13 -10   1    1.63    0.08
 -13 -10  -1    1.68    0.09
  13  10   1    1.54    0.09
 -13  10  -1    1.76    0.10
  13  10   1    1.75    0.09
 -13  10  -1    1.72    0.09
  14 -10   1    0.55    0.06
 -14 -10  -1    0.55    0.06
  14  10   1    0.50    0.06
 -14  10  -1    0.37    0.06
 -14  10  -1    0.55    0.06
  14  10   1    0.59    0.06
 -15 -10  -1    0.49    0.06
  15 -10   1    0.52    0.06
  15  10   1    0.53    0.07
 -15  10  -1    0.59    0.06
 -15  10  -1    0.52    0.07
  15  10   1    0.47    0.06
  16 -10   1   10.10    0.26
 -16 -10  -1    9.59    0.28
 -16  10  -1    9.85    0.29
 -16  10  -1   10.11    0.28
  16  10   1    9.43    0.28
  16  10   1   10.19    0.27
  17 -10   1    0.53    0.06
 -17 -10  -1    0.51    0.06
 -17  10  -1    0.43    0.07
  17  10   1    0.47    0.06
  17  10   1    0.43    0.07
 -17  10  -1    0.43    0.06
 -18 -10  -1    0.04    0.05
  18 -10   1    0.04    0.05
 -18  10  -1    0.01    0.05
 -18  10  -1   -0.02    0.06
  18  10   1   -0.01    0.05
  18  10   1   -0.01    0.05
 -19 -10  -1    0.42    0.06
  19 -10   1    0.52    0.06
  19  10   1    0.43    0.06
 -19  10  -1    0.56    0.07
  19  10   1    0.40    0.07
 -19  10  -1    0.47    0.07
 -20 -10  -1    0.27    0.06
  20 -10   1    0.12    0.05
 -20  10  -1    0.22    0.06
  20  10   1    0.20    0.06
 -20  10  -1    0.25    0.06
  20  10   1    0.30    0.06
 -21 -10  -1    3.82    0.16
  21 -10   1    4.09    0.15
  21  10   1    4.10    0.15
 -21  10  -1    4.13    0.15
  21  10   1    4.16    0.16
 -21  10  -1    3.79    0.16
  22 -10   1    2.75    0.12
 -22 -10  -1    2.64    0.12
 -22  10  -1    2.91    0.14
  22  10   1    2.75    0.13
  22  10   1    2.60    0.12
  23 -10   1    0.58    0.07
 -23 -10  -1    0.65    0.08
  23  10   1    0.56    0.07
 -23  10  -1    0.68    0.08
  23  10   1    0.68    0.08
  24 -10   1    0.07    0.06
 -24 -10  -1    0.00    0.06
 -24  10  -1    0.01    0.06
  24  10   1   -0.01    0.06
  24  10   1    0.09    0.06
  25 -10   1    0.02    0.06
  25  10   1    0.03    0.06
 -24 -11   1    2.96    0.14
  24  11  -1    3.00    0.14
 -23 -11   1    1.92    0.12
  23  11  -1    1.96    0.11
 -23  11   1    1.71    0.11
  23  11  -1    1.87    0.12
 -22 -11   1    0.69    0.08
 -22  11   1    0.82    0.08
  22  11  -1    0.75    0.08
 -22  11   1    0.76    0.09
  22  11  -1    0.56    0.08
  21 -11  -1    1.41    0.09
 -21 -11   1    1.31    0.10
 -21  11   1    1.39    0.10
 -21  11   1    1.33    0.10
  21  11  -1    1.39    0.10
  21  11  -1    1.37    0.10
 -20 -11   1    0.15    0.06
  20 -11  -1    0.18    0.06
  20  11  -1    0.12    0.06
 -20  11   1    0.15    0.06
  20  11  -1    0.22    0.06
 -20  11   1    0.15    0.06
 -19 -11   1    0.45    0.07
  19 -11  -1    0.39    0.06
 -19  11   1    0.39    0.07
  19  11  -1    0.42    0.07
 -19  11   1    0.53    0.07
  19  11  -1    0.51    0.07
 -18 -11   1   -0.01    0.05
  18 -11  -1   -0.02    0.05
  18  11  -1    0.00    0.05
 -18  11   1    0.02    0.05
 -18  11   1    0.06    0.06
  18  11  -1    0.11    0.05
 -17 -11   1    9.40    0.27
  17 -11  -1    9.67    0.26
 -17  11   1    9.44    0.28
  17  11  -1    9.61    0.28
  17  11  -1    9.59    0.27
 -17  11   1    9.77    0.28
 -16 -11   1    0.51    0.06
  16 -11  -1    0.52    0.06
  16  11  -1    0.54    0.07
 -16  11   1    0.57    0.07
  16  11  -1    0.44    0.07
 -16  11   1    0.48    0.07
  15 -11  -1    0.13    0.05
 -15 -11   1    0.10    0.05
 -15  11   1    0.20    0.06
  15  11  -1    0.03    0.06
  15  11  -1    0.12    0.05
 -15  11   1    0.15    0.05
 -14 -11   1    3.19    0.12
  14 -11  -1    3.00    0.11
  14  11  -1    3.28    0.13
 -14  11   1    3.08    0.14
  14  11  -1    2.92    0.13
 -14  11   1    3.16    0.13
 -13 -11   1   -0.02    0.04
  13 -11  -1    0.06    0.04
  13  11  -1    0.01    0.05
 -13  11   1   -0.02    0.05
  13  11  -1   -0.02    0.05
 -13  11   1    0.01    0.05
  12 -11  -1    0.25    0.04
 -12 -11   1    0.15    0.05
  12  11  -1    0.23    0.05
  12  11  -1    0.22    0.05
 -12  11   1    0.22    0.06
 -12  11   1    0.23    0.05
  11 -11  -1    5.81    0.17
 -11 -11   1    5.65    0.18
 -11  11   1    6.12    0.19
 -11  11   1    5.93    0.19
  11  11  -1    6.08    0.19
  11  11  -1    5.84    0.18
  10 -11  -1    0.14    0.04
 -10 -11   1    0.06    0.04
  10  11  -1    0.14    0.05
 -10  11   1    0.07    0.05
 -10  11   1    0.07    0.05
  10  11  -1    0.12    0.05
  -9 -11   1   17.07    0.44
   9 -11  -1   17.12    0.42
   9  11  -1   16.43    0.44
  -9  11   1   17.04    0.44
   9  11  -1   17.41    0.43
  -9  11   1   17.63    0.44
   8 -11  -1    0.02    0.04
  -8 -11   1    0.00    0.04
  -8  11   1    0.05    0.05
  -8  11   1   -0.04    0.04
   8  11  -1   -0.01    0.04
   8  11  -1    0.06    0.05
   7 -11  -1   32.21    0.76
  -7 -11   1   31.72    0.79
   7  11  -1   31.34    0.78
   7  11  -1   32.53    0.77
  -7  11   1   33.14    0.79
  -7  11   1   32.86    0.80
   6 -11  -1    0.27    0.04
  -6 -11   1    0.33    0.05
  -6  11   1    0.26    0.05
   6  11  -1    0.35    0.05
  -6  11   1    0.39    0.05
   6  11  -1    0.26    0.05
  -6  11   1    0.33    0.05
  -5 -11   1    7.85    0.22
  -5  11   1    7.74    0.22
   5  11  -1    7.76    0.22
   5  11  -1    7.06    0.22
  -5  11   1    8.37    0.22
  -5  11   1    7.45    0.22
  -4 -11   1   -0.09    0.04
  -4  11   1   -0.07    0.04
  -4  11   1   -0.05    0.04
   4  11  -1   -0.05    0.04
  -4  11   1   -0.09    0.04
   4  11  -1   -0.08    0.04
  -4  11   1    0.00    0.04
  -3 -11   1   14.04    0.37
  -3  11   1   14.19    0.36
  -3  11   1   13.75    0.37
   3  11  -1   13.94    0.36
   3  11  -1   14.19    0.37
  -3  11   1   14.49    0.36
  -2 -11   1    0.67    0.06
  -2  11   1    0.72    0.06
   2  11  -1    0.66    0.06
  -2  11   1    0.82    0.07
   2  11  -1    0.88    0.07
  -1 -11   1   19.39    0.49
   1 -11  -1   19.15    0.49
   1 -11  -1   19.03    0.47
   1  11  -1   19.09    0.47
  -1  11   1   19.43    0.48
   1  11  -1   19.19    0.48
  -1  11   1   19.68    0.47
   0 -11  -1    3.16    0.12
   0 -11   1    3.12    0.12
   0  11   1    3.23    0.11
   0  11  -1    3.00    0.12
   0  11  -1    3.16    0.12
   0  11   1    3.34    0.12
   0  11  -1    3.16    0.11
   1 -11   1   -0.05    0.04
  -1 -11  -1   -0.08    0.03
   1  11   1   -0.09    0.04
   1  11   1    0.01    0.04
  -1  11  -1   -0.06    0.04
  -1  11  -1   -0.07    0.04
  -1  11  -1   -0.04    0.04
  -2 -11  -1    1.65    0.09
  -2  11  -1    1.62    0.08
  -2  11  -1    1.57    0.09
  -2  11  -1    1.75    0.09
   2  11   1    1.73    0.09
   2  11   1    1.80    0.09
  -3 -11  -1   11.59    0.31
  -3  11  -1   11.71    0.31
   3  11   1   11.87    0.30
  -3  11  -1   12.14    0.31
  -3  11  -1   11.76    0.31
   3  11   1   11.27    0.31
  -3  11  -1   11.30    0.30
  -4 -11  -1    4.81    0.15
   4  11   1    4.42    0.15
  -4  11  -1    4.87    0.15
  -4  11  -1    4.95    0.16
  -4  11  -1    4.72    0.15
   4  11   1    4.76    0.15
  -4  11  -1    4.70    0.15
  -5 -11  -1   16.38    0.42
  -5  11  -1   16.35    0.42
   5  11   1   16.57    0.41
  -5  11  -1   16.16    0.42
   5  11   1   16.03    0.41
   6 -11   1    0.02    0.04
  -6 -11  -1    0.14    0.04
  -6  11  -1    0.15    0.05
   6  11   1    0.20    0.05
   6  11   1    0.08    0.04
  -6  11  -1    0.08    0.04
   7 -11   1   13.90    0.35
  -7 -11  -1   14.34    0.37
  -7  11  -1   14.20    0.37
   7  11   1   13.67    0.37
   7  11   1   14.28    0.36
  -7  11  -1   14.34    0.37
  -8 -11  -1    4.27    0.15
   8 -11   1    4.41    0.14
  -8  11  -1    4.16    0.15
  -8  11  -1    4.44    0.15
   8  11   1    4.39    0.14
   8  11   1    4.07    0.15
  -9 -11  -1    1.19    0.08
   9 -11   1    1.21    0.07
   9  11   1    1.27    0.08
  -9  11  -1    1.26    0.08
  -9  11  -1    1.15    0.08
   9  11   1    1.09    0.08
 -10 -11  -1    0.44    0.06
  10 -11   1    0.49    0.05
 -10  11  -1    0.59    0.07
 -10  11  -1    0.49    0.06
  10  11   1    0.45    0.06
  10  11   1    0.47    0.06
 -11 -11  -1    1.88    0.09
  11 -11   1    1.76    0.08
  11  11   1    1.84    0.09
 -11  11  -1    1.62    0.09
  11  11   1    1.82    0.09
 -11  11  -1    1.76    0.09
 -12 -11  -1    0.36    0.06
  12 -11   1    0.39    0.05
 -12  11  -1    0.42    0.06
 -12  11  -1    0.48    0.06
  12  11   1    0.35    0.06
  12  11   1    0.46    0.06
 -13 -11  -1   22.12    0.57
  13 -11   1   22.58    0.55
  13  11   1   22.91    0.56
  13  11   1   22.83    0.57
 -13  11  -1   22.96    0.58
 -13  11  -1   22.73    0.58
  14 -11   1    0.63    0.06
 -14 -11  -1    0.70    0.07
 -14  11  -1    0.76    0.07
 -14  11  -1    0.92    0.08
  14  11   1    0.85    0.08
  14  11   1    0.78    0.07
 -15 -11  -1    1.25    0.09
  15 -11   1    1.43    0.08
  15  11   1    1.23    0.09
  15  11   1    1.42    0.09
 -15  11  -1    1.49    0.10
 -15  11  -1    1.40    0.09
 -16 -11  -1    0.07    0.05
  16 -11   1    0.00    0.05
  16  11   1    0.14    0.05
  16  11   1    0.00    0.05
 -16  11  -1   -0.03    0.06
  17 -11   1   -0.06    0.05
 -17 -11  -1    0.02    0.05
  17  11   1    0.01    0.05
  17  11   1   -0.05    0.06
 -17  11  -1    0.04    0.05
  18 -11   1    4.67    0.15
 -18 -11  -1    4.35    0.16
  18  11   1    4.62    0.17
 -18  11  -1    4.26    0.17
  18  11   1    4.49    0.16
  19 -11   1    2.38    0.11
 -19 -11  -1    2.36    0.12
  19  11   1    2.34    0.12
  19  11   1    2.45    0.12
 -19  11  -1    2.50    0.13
 -20 -11  -1    1.99    0.11
  20 -11   1    2.00    0.10
 -20  11  -1    1.87    0.12
  20  11   1    2.06    0.12
  20  11   1    1.93    0.11
  21 -11   1    0.67    0.07
 -21 -11  -1    0.56    0.08
  21  11   1    0.68    0.07
  21  11   1    0.69    0.08
 -21  11  -1    0.64    0.08
  22 -11   1    0.10    0.06
 -22 -11  -1    0.04    0.06
  22  11   1    0.09    0.07
  22  11   1    0.06    0.06
 -22  11  -1    0.13    0.07
 -23 -11  -1    3.17    0.15
  23 -11   1    3.05    0.13
  23  11   1    3.09    0.14
  23  11   1    3.09    0.14
  24 -11   1    1.60    0.10
  24  11   1    1.67    0.11
  24  11   1    1.70    0.11
 -22 -12   1   -0.05    0.06
  22  12  -1    0.15    0.07
  22  12  -1   -0.04    0.06
 -21 -12   1    0.53    0.07
  21  12  -1    0.53    0.08
  21  12  -1    0.55    0.08
 -20 -12   1    5.59    0.19
  20  12  -1    5.11    0.19
  20  12  -1    5.76    0.19
 -20  12   1    5.28    0.20
 -19 -12   1    1.05    0.09
  19  12  -1    1.20    0.10
 -19  12   1    1.29    0.11
  19  12  -1    1.30    0.10
 -18 -12   1    1.63    0.10
 -18  12   1    1.84    0.12
  18  12  -1    1.93    0.11
  18  12  -1    1.59    0.11
 -17 -12   1    4.11    0.15
 -17  12   1    4.11    0.16
  17  12  -1    4.25    0.16
  17  12  -1    4.08    0.16
 -16 -12   1    0.11    0.06
 -16  12   1    0.24    0.07
  16  12  -1    0.17    0.07
 -16  12   1    0.18    0.06
  16  12  -1    0.18    0.06
 -15 -12   1    0.07    0.05
 -15  12   1    0.07    0.06
 -15  12   1    0.06    0.06
  15  12  -1    0.08    0.06
  15  12  -1    0.12    0.06
 -14 -12   1    4.15    0.15
 -14  12   1    4.32    0.16
  14  12  -1    4.21    0.15
 -14  12   1    3.98    0.16
  14  12  -1    4.04    0.16
 -13 -12   1    4.22    0.15
  13  12  -1    4.07    0.16
 -13  12   1    4.14    0.16
  13  12  -1    4.19    0.15
 -13  12   1    4.35    0.16
 -12 -12   1    0.61    0.07
 -12  12   1    0.58    0.07
  12  12  -1    0.68    0.07
  12  12  -1    0.62    0.07
 -12  12   1    0.66    0.07
 -11 -12   1    1.24    0.08
 -11  12   1    1.41    0.09
 -11  12   1    1.36    0.09
  11  12  -1    1.21    0.09
  11  12  -1    1.35    0.09
 -10 -12   1    0.19    0.05
 -10  12   1    0.20    0.05
  10  12  -1    0.14    0.05
  10  12  -1    0.15    0.06
 -10  12   1    0.19    0.06
  -9 -12   1   -0.02    0.04
   9 -12  -1    0.03    0.04
  -9  12   1   -0.02    0.05
  -9  12   1    0.00    0.05
   9  12  -1   -0.03    0.05
   9  12  -1   -0.06    0.05
   8 -12  -1    4.41    0.14
  -8 -12   1    4.44    0.15
  -8  12   1    4.29    0.15
   8  12  -1    4.18    0.15
   8  12  -1    4.11    0.15
  -8  12   1    4.30    0.15
  -7 -12   1    3.28    0.12
   7 -12  -1    3.35    0.12
   7  12  -1    3.04    0.13
  -7  12   1    3.21    0.12
  -7  12   1    3.25    0.13
   7  12  -1    3.22    0.12
  -6 -12   1    0.79    0.07
   6 -12  -1    0.77    0.07
  -6  12   1    0.72    0.07
   6  12  -1    0.74    0.07
   6  12  -1    0.82    0.07
  -5 -12   1    3.26    0.12
   5  12  -1    3.43    0.13
   5  12  -1    3.25    0.13
  -5  12   1    3.25    0.13
  -5  12   1    3.45    0.13
  -4 -12   1    0.52    0.06
  -4  12   1    0.45    0.06
  -4  12   1    0.58    0.06
   4  12  -1    0.45    0.06
  -4  12   1    0.55    0.06
   4  12  -1    0.45    0.06
   3 -12  -1    0.20    0.05
  -3 -12   1    0.27    0.05
   3  12  -1    0.20    0.05
  -3  12   1    0.14    0.05
   3  12  -1    0.23    0.05
  -3  12   1    0.23    0.05
   2 -12  -1    1.66    0.09
  -2 -12   1    1.76    0.09
   2  12  -1    1.71    0.09
  -2  12   1    1.73    0.09
  -2  12   1    1.75    0.09
   2  12  -1    1.66    0.09
  -1 -12   1    0.15    0.04
   1 -12  -1    0.19    0.05
   1  12  -1    0.07    0.05
  -1  12   1    0.13    0.04
   1  12  -1    0.08    0.05
  -1  12   1    0.13    0.05
   0 -12   1    0.07    0.04
   0 -12  -1    0.02    0.04
   0  12   1    0.05    0.05
   0  12   1    0.10    0.05
   0  12  -1    0.05    0.04
   0  12  -1    0.00    0.04
   1 -12   1    0.10    0.04
  -1 -12  -1    0.01    0.04
   1  12   1    0.11    0.05
   1  12   1    0.10    0.04
  -1  12  -1    0.04    0.04
  -1  12  -1    0.11    0.05
   2 -12   1    0.09    0.05
  -2 -12  -1    0.08    0.05
   2  12   1    0.20    0.05
   2  12   1    0.17    0.05
  -2  12  -1    0.15    0.05
  -2  12  -1    0.18    0.05
  -2  12  -1    0.18    0.05
  -3 -12  -1    0.80    0.07
   3  12   1    0.85    0.07
  -3  12  -1    0.82    0.07
  -3  12  -1    0.90    0.07
   3  12   1    0.79    0.07
  -3  12  -1    0.82    0.07
  -4 -12  -1    0.07    0.04
  -4  12  -1    0.07    0.04
  -4  12  -1   -0.03    0.04
   4  12   1    0.04    0.04
   4  12   1    0.04    0.04
  -4  12  -1    0.03    0.04
  -5 -12  -1    0.34    0.05
  -5  12  -1    0.39    0.06
   5  12   1    0.41    0.05
   5  12   1    0.37    0.06
  -5  12  -1    0.43    0.06
   6 -12   1    0.24    0.04
  -6 -12  -1    0.30    0.05
  -6  12  -1    0.15    0.05
  -6  12  -1    0.25    0.05
   6  12   1    0.29    0.05
   6  12   1    0.18    0.06
  -7 -12  -1    0.55    0.06
   7 -12   1    0.43    0.05
  -7  12  -1    0.55    0.07
   7  12   1    0.50    0.06
  -7  12  -1    0.52    0.06
   7  12   1    0.51    0.06
  -8 -12  -1    0.79    0.07
   8 -12   1    0.80    0.07
   8  12   1    0.62    0.07
  -8  12  -1    0.70    0.07
   8  12   1    0.71    0.07
  -8  12  -1    0.81    0.07
  -9 -12  -1    1.35    0.09
   9 -12   1    1.54    0.08
   9  12   1    1.46    0.09
  -9  12  -1    1.43    0.09
   9  12   1    1.27    0.09
  10 -12   1    0.73    0.06
 -10 -12  -1    0.84    0.07
  10  12   1    0.80    0.07
  10  12   1    0.78    0.07
 -10  12  -1    0.80    0.08
  11 -12   1    1.29    0.08
 -11 -12  -1    1.42    0.09
 -11  12  -1    1.17    0.09
  11  12   1    1.38    0.09
  11  12   1    1.23    0.09
 -12 -12  -1    0.49    0.06
  12 -12   1    0.49    0.06
  12  12   1    0.54    0.07
  12  12   1    0.45    0.06
 -12  12  -1    0.52    0.07
 -13 -12  -1    0.15    0.05
  13 -12   1    0.04    0.05
 -13  12  -1    0.15    0.06
  13  12   1    0.13    0.05
  13  12   1    0.08    0.05
 -14 -12  -1    2.26    0.11
  14 -12   1    2.25    0.10
 -14  12  -1    2.27    0.12
  14  12   1    2.34    0.12
  14  12   1    2.27    0.11
  15 -12   1    0.41    0.06
 -15 -12  -1    0.41    0.07
  15  12   1    0.35    0.07
 -15  12  -1    0.47    0.08
  15  12   1    0.32    0.06
  16 -12   1    0.99    0.08
 -16 -12  -1    0.94    0.09
  16  12   1    1.10    0.09
  16  12   1    0.99    0.09
 -16  12  -1    1.06    0.09
  17 -12   1    3.68    0.14
 -17 -12  -1    3.61    0.15
  17  12   1    3.68    0.16
  17  12   1    3.71    0.15
 -17  12  -1    3.88    0.16
 -18 -12  -1    1.96    0.11
  18 -12   1    2.02    0.10
 -18  12  -1    2.19    0.13
  18  12   1    1.96    0.11
  18  12   1    2.11    0.12
  19 -12   1    0.05    0.06
 -19 -12  -1    0.03    0.06
 -19  12  -1    0.09    0.07
  19  12   1    0.12    0.07
  19  12   1    0.05    0.06
  20 -12   1    0.25    0.06
 -20 -12  -1    0.36    0.07
  20  12   1    0.35    0.08
  20  12   1    0.31    0.07
 -20  12  -1    0.30    0.08
 -21 -12  -1    0.08    0.07
  21  12   1    0.25    0.07
  21  12   1    0.10    0.06
  22  12   1    0.70    0.08
  21  13  -1    0.57    0.08
 -20 -13   1    0.49    0.08
  20  13  -1    0.48    0.08
 -19 -13   1    3.64    0.15
  19  13  -1    3.48    0.15
 -18 -13   1    4.56    0.17
  18  13  -1    4.06    0.17
  18  13  -1    4.39    0.17
 -17 -13   1    0.49    0.07
  17  13  -1    0.44    0.07
  17  13  -1    0.38    0.07
 -16 -13   1    2.21    0.11
  16  13  -1    2.00    0.12
  16  13  -1    2.42    0.12
 -15 -13   1    1.65    0.10
  15  13  -1    1.55    0.11
  15  13  -1    1.72    0.11
 -14 -13   1    0.00    0.05
  14  13  -1    0.06    0.06
  14  13  -1    0.10    0.06
 -13 -13   1   13.75    0.37
  13  13  -1   14.05    0.37
  13  13  -1   13.82    0.38
 -12 -13   1    0.00    0.05
  12  13  -1    0.02    0.05
  12  13  -1    0.03    0.06
 -11 -13   1    0.28    0.06
  11  13  -1    0.27    0.06
  11  13  -1    0.21    0.06
 -10 -13   1    2.08    0.10
  10  13  -1    2.02    0.11
 -10  13   1    2.15    0.11
  10  13  -1    1.99    0.11
  -9 -13   1    0.05    0.05
   9  13  -1   -0.01    0.06
  -9  13   1    0.06    0.05
   9  13  -1   -0.01    0.05
  -8 -13   1    0.84    0.07
   8  13  -1    0.72    0.08
  -8  13   1    0.72    0.07
   8  13  -1    0.67    0.07
  -7 -13   1    3.68    0.13
   7 -13  -1    3.30    0.13
  -7  13   1    3.41    0.14
   7  13  -1    3.47    0.13
   7  13  -1    3.43    0.14
   6 -13  -1    0.89    0.08
  -6 -13   1    0.98    0.08
   6  13  -1    1.11    0.08
  -6  13   1    1.09    0.09
   6  13  -1    0.72    0.08
   5 -13  -1   -0.02    0.05
  -5 -13   1    0.06    0.04
   5  13  -1    0.02    0.05
   5  13  -1   -0.05    0.05
  -5  13   1   -0.05    0.04
  -4 -13   1    0.32    0.05
  -4  13   1    0.22    0.06
   4  13  -1    0.20    0.06
   4  13  -1    0.24    0.05
   3 -13  -1    0.14    0.05
  -3 -13   1    0.16    0.05
   3  13  -1    0.16    0.05
  -3  13   1    0.16    0.05
   3  13  -1    0.09    0.06
  -2 -13   1    5.14    0.17
   2 -13  -1    5.30    0.17
   2  13  -1    5.46    0.17
  -2  13   1    5.47    0.17
   2  13  -1    5.31    0.18
  -1 -13   1    1.50    0.09
   1 -13  -1    1.57    0.09
   1  13  -1    1.55    0.09
   1  13  -1    1.52    0.09
  -1  13   1    1.49    0.09
   0 -13   1    0.84    0.07
   0 -13  -1    0.83    0.08
   0  13   1    0.90    0.08
   0  13  -1    0.83    0.07
   0  13  -1    0.89    0.08
  -1 -13  -1    0.20    0.05
   1 -13   1    0.20    0.05
   1  13   1    0.14    0.06
  -1  13  -1    0.20    0.05
  -1  13  -1    0.13    0.05
  -2 -13  -1    2.15    0.10
  -2  13  -1    2.15    0.10
   2  13   1    2.14    0.11
  -2  13  -1    2.21    0.10
  -3 -13  -1    2.82    0.12
  -3  13  -1    2.83    0.12
   3  13   1    2.76    0.12
  -4 -13  -1    9.22    0.27
   4  13   1    9.38    0.27
  -4  13  -1    9.94    0.27
  -5 -13  -1    1.93    0.10
   5 -13   1    1.76    0.09
  -5  13  -1    1.77    0.10
   5  13   1    1.84    0.10
   6 -13   1    7.54    0.21
  -6 -13  -1    7.56    0.23
   6  13   1    7.28    0.23
  -6  13  -1    7.64    0.23
   7 -13   1    0.25    0.05
  -7 -13  -1    0.26    0.05
   7  13   1    0.20    0.06
  -7  13  -1    0.14    0.06
   8 -13   1    0.13    0.05
  -8 -13  -1    0.12    0.05
   8  13   1    0.00    0.05
  -8  13  -1    0.12    0.06
  -9 -13  -1    5.72    0.19
   9 -13   1    5.80    0.18
  -9  13  -1    5.81    0.19
   9  13   1    5.55    0.19
 -10 -13  -1    0.53    0.07
  10  13   1    0.54    0.08
 -10  13  -1    0.44    0.07
 -11 -13  -1    0.88    0.07
  11  13   1    0.86    0.08
 -11  13  -1    1.08    0.09
 -12 -13  -1    0.04    0.05
  12  13   1    0.03    0.06
 -12  13  -1    0.01    0.06
 -13 -13  -1    1.24    0.09
  13  13   1    1.17    0.10
 -13  13  -1    1.15    0.09
 -14 -13  -1    0.01    0.06
  14  13   1    0.08    0.06
 -14  13  -1    0.08    0.06
 -15 -13  -1    3.66    0.15
 -15  13  -1    3.56    0.16
  15  13   1    3.65    0.15
 -16 -13  -1    0.16    0.06
  16  13   1    0.16    0.07
 -16  13  -1    0.21    0.07
 -17 -13  -1    0.78    0.08
 -17  13  -1    0.82    0.09
  17  13   1    0.73    0.09
 -18 -13  -1    0.22    0.07
 -18  13  -1    0.23    0.07
  18  13   1   -0.01    0.07
 -19 -13  -1    1.12    0.10
 -18 -14   1    0.03    0.06
 -17 -14   1    4.06    0.16
 -16 -14   1    2.77    0.13
  16 -14  -1    2.68    0.14
  15 -14  -1    0.04    0.06
 -15 -14   1    0.02    0.06
  15  14  -1    0.04    0.07
 -14 -14   1    7.66    0.23
  14 -14  -1    7.05    0.24
  14  14  -1    7.47    0.24
 -13 -14   1    0.40    0.07
  13 -14  -1    0.40    0.07
  13  14  -1    0.35    0.07
  12 -14  -1    0.11    0.06
 -12 -14   1    0.18    0.06
  12  14  -1    0.16    0.07
 -11 -14   1    1.73    0.10
  11 -14  -1    1.82    0.11
  11  14  -1    1.78    0.11
 -10 -14   1    0.02    0.05
  10 -14  -1    0.03    0.05
  10  14  -1    0.00    0.06
   9 -14  -1    0.09    0.06
  -9 -14   1    0.13    0.05
   9  14  -1    0.06    0.06
   8 -14  -1    0.75    0.07
  -8 -14   1    0.89    0.08
   8  14  -1    0.72    0.08
   7 -14  -1    2.55    0.12
   7  14  -1    2.40    0.12
   6  14  -1    0.03    0.06
   5  14  -1    0.95    0.09
   4  14  -1   -0.03    0.06
   3 -14  -1    0.04    0.05
  -3  14   1    0.13    0.06
   3  14  -1    0.11    0.05
   2 -14  -1    0.10    0.05
  -2  14   1    0.13    0.06
   2  14  -1    0.15    0.06
   1 -14  -1    2.85    0.12
  -1  14   1    2.67    0.12
   1  14  -1    2.67    0.12
   0 -14  -1    0.29    0.06
   0  14   1    0.26    0.06
  -1 -14  -1    0.22    0.06
   1  14   1    0.15    0.06
  -2 -14  -1    3.54    0.14
   2  14   1    3.36    0.14
  -3 -14  -1   -0.01    0.05
   3  14   1    0.07    0.05
  -4 -14  -1    0.57    0.07
   4  14   1    0.61    0.08
  -5 -14  -1    1.11    0.09
   5  14   1    1.17    0.09
  -6 -14  -1    0.61    0.07
   6  14   1    0.45    0.07
  -7 -14  -1    0.57    0.07
   7  14   1    0.51    0.08
  -8 -14  -1    1.75    0.10
   8  14   1    1.45    0.10
  -8  14  -1    1.75    0.11
  -9 -14  -1    0.40    0.06
  -9  14  -1    0.60    0.08
   9  14   1    0.36    0.07
 -10 -14  -1   -0.04    0.05
 -10  14  -1    0.03    0.06
  10  14   1    0.06    0.06
 -11 -14  -1   -0.02    0.05
 -11  14  -1    0.08    0.06
  11  14   1    0.14    0.07
 -12 -14  -1   -0.03    0.05
 -12  14  -1    0.07    0.06
  12  14   1    0.02    0.06
 -13 -14  -1    0.31    0.07
  13  14   1    0.26    0.07
 -13  14  -1    0.37    0.07
 -14 -14  -1    0.32    0.06
  14  14   1    0.31    0.08
 -14  14  -1    0.49    0.08
 -15 -14  -1    0.30    0.07
 -15  14  -1    0.38    0.08
 -16 -14  -1    1.07    0.10
 -17 -14  -1    0.06    0.07
  13 -15  -1    1.67    0.11
  12 -15  -1    0.01    0.06
  11 -15  -1    0.03    0.06
  11  15  -1    0.02    0.06
  10 -15  -1    4.38    0.17
  10  15  -1    4.42    0.17
   9  15  -1    0.15    0.07
   8  15  -1    3.90    0.16
   7  15  -1    0.01    0.06
   6  15  -1    1.26    0.10
   5  15  -1   -0.08    0.06
  -2  15   1    0.53    0.07
  -1  15   1    0.20    0.06
   0  15   1    0.11    0.06
   1 -15   1    1.05    0.09
   1  15   1    0.99    0.09
   2  15   1   -0.02    0.06
   3  15   1    0.00    0.06
   4  15   1    0.16    0.07
   5  15   1    0.60    0.08
   6  15   1    6.05    0.20
  -7 -15  -1    0.64    0.08
   7  15   1    0.55    0.08
  -8 -15  -1    2.84    0.13
   8  15   1    3.03    0.14
  -9 -15  -1    1.29    0.10
   9  15   1    1.39    0.10
 -10 -15  -1    0.48    0.07
  10  15   1    0.51    0.08
 -11 -15  -1    0.92    0.09
 -12 -15  -1    3.92    0.16
 -13 -15  -1    0.02    0.06
 -14 -15  -1    2.91    0.14
  -3 -16   1    0.44    0.08
  -2 -16   1    1.59    0.11
  -1 -16   1    2.36    0.12
   0 -16   1    0.41    0.07
   1  16   1    1.94    0.12
   2  16   1    0.68    0.08
   3  16   1    1.24    0.11
   4  16   1    0.23    0.07
   5  16   1    2.75    0.14
  32   0  -2    4.04    0.15
 -32   0   2    3.91    0.16
 -31   0   2    0.12    0.06
  31   0  -2    0.01    0.05
 -30   0   2    1.01    0.09
  30   0  -2    0.96    0.08
  29   0  -2    0.08    0.05
 -29   0   2    0.02    0.05
 -28   0   2    7.82    0.24
  28   0  -2    8.02    0.23
 -27   0   2    0.09    0.05
  27   0  -2    0.03    0.05
 -26   0   2    0.85    0.07
  26   0  -2    0.83    0.07
 -25   0   2    0.03    0.04
  25   0  -2   -0.01    0.04
 -24   0   2    8.42    0.24
  24   0  -2    8.86    0.24
  23   0  -2    0.04    0.04
 -23   0   2    0.14    0.05
  22   0  -2   20.68    0.49
 -22   0   2   19.97    0.51
  21   0  -2    0.09    0.04
 -21   0   2    0.07    0.04
  20   0  -2   22.50    0.54
 -20   0   2   21.89    0.56
 -20   0   2   23.02    0.54
 -19   0   2    0.06    0.04
  19   0  -2    0.03    0.03
 -19   0   2    0.07    0.03
  18   0  -2    4.26    0.13
 -18   0   2    4.22    0.13
 -18   0   2    4.13    0.13
  17   0  -2   -0.04    0.03
 -17   0   2   -0.01    0.03
 -17   0   2   -0.06    0.02
 -16   0   2    5.06    0.14
 -16   0   2    4.94    0.12
  16   0  -2    5.11    0.14
 -16   0   2    4.76    0.14
 -15   0   2   -0.05    0.02
  15   0  -2    0.00    0.02
 -15   0   2   -0.04    0.02
 -15   0   2   -0.03    0.03
 -14   0   2   17.54    0.42
 -14   0   2   18.24    0.43
 -14   0   2   18.05    0.44
 -13   0   2    0.00    0.02
 -13   0   2    0.00    0.02
  13   0  -2    0.00    0.02
 -13   0   2    0.00    0.01
 -12   0   2   18.27    0.43
  12   0  -2   19.22    0.44
 -12   0   2   18.38    0.45
 -12   0   2   18.33    0.44
  11   0  -2    0.00    0.02
 -11   0   2    0.00    0.02
 -11   0   2    0.02    0.01
 -11   0   2    0.02    0.02
 -10   0   2   12.48    0.30
 -10   0   2   12.78    0.31
  10   0  -2   13.36    0.30
 -10   0   2   13.01    0.32
   9   0  -2   -0.05    0.02
  -9   0   2    0.00    0.02
  -9   0   2   -0.06    0.01
  -9   0   2   -0.04    0.02
  -8   0   2  222.95    4.99
   8   0  -2  216.75    4.98
  -8   0   2  214.62    5.15
  -8   0   2  222.53    5.78
  -7   0   2   -0.01    0.02
   7   0  -2    0.00    0.01
  -7   0   2   -0.01    0.01
  -7   0   2   -0.02    0.02
  -6   0   2   28.55    0.66
  -6   0   2   27.43    0.64
   5   0  -2   -0.29    0.01
   5   0  -2   -0.26    0.01
  -5   0   2   -0.27    0.02
  -5   0   2   -0.28    0.01
  -4   0   2  382.05    9.08
   4   0  -2  386.56    9.25
   4   0  -2  395.79    9.48
  -4   0   2  386.15    9.50
  -3   0   2    0.00    0.01
   3   0  -2    0.01    0.01
   3   0  -2    0.00    0.01
  -3   0   2    0.00    0.01
   2   0  -2   29.86    0.70
   2   0  -2   31.01    0.71
  -2   0   2   30.49    0.70
  -2   0   2   30.64    0.72
   1   0  -2   -0.45    0.00
   1   0  -2   -0.45    0.00
  -1   0   2   -0.45    0.00
  -1   0   2   -0.45    0.00
   0   0   2   60.22    1.41
   0   0   2   62.20    1.39
   0   0  -2   61.14    1.42
   0   0  -2   62.26    1.44
   1   0   2   -0.08    0.01
  -1   0  -2   -0.08    0.01
   1   0   2   -0.07    0.01
  -1   0  -2   -0.09    0.01
  -2   0  -2  230.26    5.52
   2   0   2  232.74    5.57
   2   0   2  224.21    5.51
  -2   0  -2  224.19    5.72
  -3   0  -2   -0.31    0.01
  -3   0  -2   -0.29    0.01
   3   0   2   -0.28    0.01
   3   0   2   -0.31    0.01
   4   0   2   99.79    2.20
  -4   0  -2   91.48    2.23
   4   0   2   97.34    2.19
   5   0   2   -0.02    0.01
  -5   0  -2   -0.01    0.02
  -5   0  -2   -0.03    0.02
   5   0   2   -0.02    0.01
   6   0   2  113.37    2.62
  -6   0  -2  113.65    2.59
  -6   0  -2  113.65    2.64
   6   0   2  107.08    2.55
   7   0   2    0.00    0.01
  -7   0  -2   -0.03    0.02
  -7   0  -2   -0.01    0.02
   7   0   2   -0.03    0.01
   8   0   2   17.90    0.42
  -8   0  -2   18.04    0.44
  -8   0  -2   18.22    0.43
   8   0   2   18.65    0.42
   9   0   2   -0.10    0.02
  -9   0  -2   -0.10    0.02
  -9   0  -2   -0.09    0.02
   9   0   2   -0.07    0.01
 -10   0  -2  127.63    2.92
  10   0   2  128.76    2.88
 -10   0  -2  120.98    2.96
  11   0   2    0.06    0.02
 -11   0  -2   -0.01    0.02
  11   0   2   -0.02    0.02
 -11   0  -2   -0.02    0.02
 -12   0  -2  195.22    4.79
 -12   0  -2  211.83    4.71
  12   0   2  204.09    5.80
  12   0   2  202.61    4.64
 -13   0  -2    0.04    0.03
 -13   0  -2    0.02    0.02
  13   0   2    0.02    0.02
  13   0   2    0.06    0.02
  14   0   2    0.37    0.04
  14   0   2    0.41    0.03
 -14   0  -2    0.38    0.03
 -14   0  -2    0.35    0.04
  15   0   2    0.03    0.02
  15   0   2    0.01    0.03
 -15   0  -2    0.01    0.03
 -15   0  -2    0.03    0.03
  16   0   2    0.67    0.05
 -16   0  -2    0.68    0.05
 -16   0  -2    0.77    0.05
  17   0   2    0.03    0.03
 -17   0  -2    0.03    0.03
 -17   0  -2   -0.02    0.03
  18   0   2    6.29    0.18
 -18   0  -2    6.18    0.18
 -18   0  -2    6.87    0.18
 -19   0  -2   -0.04    0.03
  19   0   2    0.04    0.03
 -19   0  -2    0.06    0.04
  20   0   2   10.40    0.27
 -20   0  -2   10.21    0.28
 -20   0  -2   10.79    0.27
 -21   0  -2    0.02    0.03
 -21   0  -2    0.00    0.04
  21   0   2    0.00    0.03
  22   0   2    0.46    0.05
 -22   0  -2    0.42    0.05
 -23   0  -2    0.04    0.04
  23   0   2    0.02    0.04
  24   0   2    4.05    0.14
 -24   0  -2    3.95    0.14
  25   0   2    0.08    0.05
 -25   0  -2    0.04    0.05
 -26   0  -2    0.18    0.05
  26   0   2    0.12    0.05
 -27   0  -2    0.00    0.05
  27   0   2   -0.04    0.05
  28   0   2   -0.04    0.05
 -28   0  -2    0.01    0.05
 -29   0  -2    0.01    0.05
  29   0   2    0.00    0.05
 -30   0  -2    2.50    0.12
  30   0   2    2.63    0.12
 -32  -1   2    1.83    0.11
  32  -1  -2    2.06    0.11
  32   1  -2    1.95    0.11
 -32   1   2    1.99    0.12
 -31  -1   2    0.62    0.07
  31  -1  -2    0.57    0.07
 -31   1   2    0.48    0.07
  31   1  -2    0.48    0.07
  30  -1  -2    0.22    0.06
 -30  -1   2    0.20    0.06
  30   1  -2    0.22    0.05
 -30   1   2    0.30    0.06
  29  -1  -2    0.38    0.06
 -29  -1   2    0.43    0.07
  29   1  -2    0.38    0.06
 -29   1   2    0.36    0.06
  28  -1  -2    0.21    0.05
 -28  -1   2    0.22    0.06
  28   1  -2    0.20    0.05
 -28   1   2    0.24    0.06
 -27  -1   2    7.87    0.24
  27  -1  -2    7.54    0.22
 -27   1   2    7.97    0.24
  27   1  -2    7.97    0.23
 -26  -1   2    1.23    0.09
  26  -1  -2    1.12    0.07
 -26   1   2    1.25    0.08
  26   1  -2    1.20    0.08
  25  -1  -2    0.23    0.05
 -25  -1   2    0.21    0.05
  25   1  -2    0.17    0.04
 -25   1   2    0.17    0.05
  24  -1  -2    1.01    0.07
 -24  -1   2    0.98    0.07
 -24   1   2    0.99    0.08
  24   1  -2    0.96    0.07
  23  -1  -2    0.53    0.05
 -23  -1   2    0.52    0.06
 -23   1   2    0.55    0.06
  23   1  -2    0.50    0.05
 -23   1   2    0.59    0.05
 -22  -1   2    8.43    0.24
  22  -1  -2    8.87    0.23
  22   1  -2    8.96    0.24
 -22   1   2    8.85    0.24
 -22   1   2    8.39    0.24
 -21  -1   2    4.56    0.15
  21  -1  -2    4.72    0.14
  21   1  -2    4.98    0.15
 -21   1   2    4.84    0.15
 -21   1   2    4.47    0.15
 -20  -1   2    0.28    0.05
  20  -1  -2    0.25    0.04
 -20   1   2    0.26    0.04
 -20   1   2    0.23    0.04
  20   1  -2    0.28    0.04
 -19  -1   2    1.14    0.07
  19  -1  -2    0.92    0.06
 -19   1   2    1.06    0.06
 -19   1   2    1.07    0.07
  19   1  -2    1.05    0.06
 -18  -1   2    0.26    0.03
 -18  -1   2    0.27    0.04
  18  -1  -2    0.32    0.04
 -18   1   2    0.23    0.04
  18   1  -2    0.27    0.04
 -18   1   2    0.25    0.04
 -17  -1   2    2.64    0.08
  17  -1  -2    2.67    0.09
 -17  -1   2    2.68    0.09
 -17  -1   2    2.66    0.09
  17   1  -2    2.61    0.09
 -17   1   2    2.48    0.09
 -17   1   2    2.42    0.09
 -16  -1   2    8.91    0.24
  16  -1  -2    9.38    0.23
 -16  -1   2    9.09    0.23
  16   1  -2    8.93    0.23
 -16   1   2    9.19    0.24
 -16   1   2    9.23    0.24
  15  -1  -2    0.63    0.05
 -15  -1   2    0.60    0.05
 -15  -1   2    0.46    0.04
 -15   1   2    0.43    0.02
 -15   1   2    0.49    0.04
  15   1  -2    0.56    0.04
 -15   1   2    0.52    0.04
 -14  -1   2    0.60    0.05
 -14  -1   2    0.56    0.04
  14  -1  -2    0.73    0.05
 -14   1   2    0.46    0.03
  14   1  -2    0.84    0.05
 -14   1   2    0.62    0.05
 -14   1   2    0.67    0.05
 -13  -1   2    4.23    0.12
 -13  -1   2    4.20    0.11
  13  -1  -2    4.33    0.12
 -13   1   2    4.10    0.12
  13   1  -2    4.11    0.12
 -13   1   2    4.11    0.12
  13   1  -2    4.26    0.11
 -13   1   2    4.03    0.10
 -12  -1   2    0.62    0.04
 -12  -1   2    0.51    0.03
  12  -1  -2    0.63    0.04
 -12   1   2    0.46    0.04
  12   1  -2    0.52    0.04
 -12   1   2    0.37    0.02
 -12   1   2    0.52    0.04
  12   1  -2    0.43    0.04
  11  -1  -2    0.46    0.04
 -11  -1   2    0.49    0.04
 -11  -1   2    0.41    0.03
  11   1  -2    0.46    0.03
 -11   1   2    0.42    0.03
 -11   1   2    0.33    0.02
 -11   1   2    0.41    0.03
  11   1  -2    0.38    0.03
 -10  -1   2    6.82    0.18
  10  -1  -2    7.21    0.17
  10   1  -2    7.35    0.17
 -10   1   2    6.84    0.18
 -10   1   2    7.28    0.18
 -10   1   2    7.02    0.17
  10   1  -2    7.27    0.18
   9  -1  -2    7.44    0.19
  -9  -1   2    7.99    0.20
   9   1  -2    7.98    0.19
  -9   1   2    7.79    0.19
  -9   1   2    7.82    0.18
  -9   1   2    7.37    0.19
   9   1  -2    7.94    0.19
  -8  -1   2    1.95    0.06
   8  -1  -2    2.06    0.06
  -8   1   2    1.99    0.06
   8   1  -2    1.99    0.06
  -8   1   2    1.87    0.05
  -8   1   2    1.80    0.06
   8   1  -2    1.94    0.06
   8   1  -2    2.03    0.06
   7  -1  -2   17.04    0.38
  -7  -1   2   16.89    0.39
   7   1  -2   17.05    0.38
  -7   1   2   15.90    0.39
  -7   1   2   16.17    0.38
   7   1  -2   15.87    0.38
  -7   1   2   15.84    0.39
   7   1  -2   17.18    0.38
   6  -1  -2   -0.01    0.01
  -6  -1   2   -0.01    0.01
  -6   1   2   -0.03    0.02
  -6   1   2   -0.02    0.02
   6   1  -2   -0.02    0.01
   6   1  -2    0.00    0.01
   6   1  -2   -0.01    0.01
  -6   1   2    0.00    0.01
  -5  -1   2    0.83    0.03
   5  -1  -2    0.86    0.03
   5   1  -2    0.79    0.03
   5   1  -2    0.85    0.04
   5   1  -2    0.82    0.03
  -5   1   2    0.72    0.03
  -5   1   2    0.81    0.02
  -5   1   2    0.80    0.04
  -4  -1   2    1.00    0.04
   4  -1  -2    0.90    0.03
   4   1  -2    0.91    0.03
   4   1  -2    0.85    0.03
  -4   1   2    0.93    0.03
  -4   1   2    0.79    0.04
  -4   1   2    0.94    0.04
   3  -1  -2    0.30    0.02
  -3  -1   2    0.29    0.02
  -3  -1   2    0.27    0.02
   3  -1  -2    0.25    0.02
   3   1  -2    0.26    0.01
  -3   1   2    0.24    0.02
   3   1  -2    0.27    0.02
  -3   1   2    0.29    0.02
  -2  -1   2    1.05    0.03
   2  -1  -2    1.02    0.03
   2  -1  -2    1.08    0.03
  -2  -1   2    1.13    0.03
   2   1  -2    1.07    0.03
  -2   1   2    1.04    0.03
   2   1  -2    0.96    0.03
  -2   1   2    1.03    0.03
  -1  -1   2    1.06    0.03
   1  -1  -2    0.94    0.03
   1   1  -2    1.14    0.03
  -1   1   2    1.01    0.03
  -1   1   2    0.98    0.03
   1   1  -2    1.01    0.03
   0  -1   2    0.03    0.01
   0  -1  -2    0.04    0.01
   0   1   2    0.04    0.01
   0   1   2    0.03    0.01
   0   1  -2    0.03    0.01
   0   1   2    0.02    0.01
   0   1  -2    0.02    0.01
  -1  -1  -2    0.61    0.02
  -1  -1  -2    0.62    0.02
   1  -1   2    0.66    0.02
  -1   1  -2    0.63    0.02
  -1   1  -2    0.68    0.02
   1   1   2    0.67    0.02
   1   1   2    0.65    0.02
  -1   1  -2    0.59    0.02
   2  -1   2    0.17    0.01
  -2  -1  -2    0.23    0.02
   2  -1   2    0.18    0.01
  -2  -1  -2    0.17    0.01
   2   1   2    0.18    0.01
  -2   1  -2    0.17    0.01
   2   1   2    0.17    0.01
  -2   1  -2    0.15    0.01
  -3  -1  -2    0.26    0.02
   3  -1   2    0.28    0.02
   3  -1   2    0.29    0.01
  -3  -1  -2    0.28    0.02
  -3   1  -2    0.22    0.02
   3   1   2    0.23    0.02
   3   1   2    0.27    0.02
  -3   1  -2    0.23    0.02
  -4  -1  -2    0.98    0.04
   4  -1   2    0.93    0.03
  -4  -1  -2    0.87    0.03
   4  -1   2    0.90    0.04
   4   1   2    0.92    0.04
  -4   1  -2    0.89    0.04
  -4   1  -2    0.86    0.04
   4   1   2    0.87    0.03
  -5  -1  -2    0.05    0.02
  -5  -1  -2    0.04    0.01
   5  -1   2    0.04    0.02
   5  -1   2    0.04    0.01
  -5   1  -2    0.01    0.02
   5   1   2    0.01    0.01
  -5   1  -2    0.01    0.02
   5   1   2    0.02    0.01
   6  -1   2    6.50    0.16
   6  -1   2    6.64    0.15
  -6  -1  -2    6.24    0.16
  -6  -1  -2    6.20    0.15
   6   1   2    6.18    0.15
  -6   1  -2    5.98    0.16
   6   1   2    6.93    0.16
  -6   1  -2    6.45    0.16
  -7  -1  -2    2.65    0.07
  -7  -1  -2    2.62    0.08
   7  -1   2    2.50    0.07
   7  -1   2    2.59    0.07
   7   1   2    2.53    0.07
  -7   1  -2    2.68    0.08
  -7   1  -2    2.61    0.08
   7   1   2    2.56    0.07
  -8  -1  -2    0.00    0.02
  -8  -1  -2   -0.01    0.01
   8  -1   2    0.03    0.02
   8  -1   2    0.01    0.01
   8   1   2    0.02    0.02
  -8   1  -2   -0.01    0.02
  -8   1  -2    0.00    0.02
   8   1   2   -0.01    0.02
   9  -1   2    0.52    0.03
   9  -1   2    0.44    0.02
  -9  -1  -2    0.42    0.03
  -9  -1  -2    0.45    0.04
  -9   1  -2    0.45    0.04
   9   1   2    0.45    0.04
  -9   1  -2    0.43    0.03
   9   1   2    0.43    0.03
  10  -1   2    2.15    0.06
 -10  -1  -2    2.09    0.07
  10  -1   2    2.17    0.07
 -10  -1  -2    2.02    0.07
  10   1   2    2.14    0.07
 -10   1  -2    2.08    0.07
  10   1   2    2.12    0.06
 -10   1  -2    2.05    0.07
 -11  -1  -2    7.49    0.21
  11  -1   2    8.23    0.19
  11  -1   2    8.44    0.20
 -11  -1  -2    7.88    0.20
  11   1   2    8.26    0.20
 -11   1  -2    7.44    0.20
 -11   1  -2    8.02    0.20
  11   1   2    8.14    0.20
  12  -1   2    2.67    0.08
 -12  -1  -2    2.74    0.08
 -12  -1  -2    2.76    0.09
  12  -1   2    2.64    0.07
  12   1   2    2.77    0.08
  12   1   2    2.66    0.09
 -12   1  -2    2.68    0.09
 -12   1  -2    2.62    0.09
 -13  -1  -2    0.04    0.02
  13  -1   2    0.02    0.01
 -13  -1  -2    0.00    0.02
  13  -1   2    0.02    0.02
  13   1   2    0.01    0.02
 -13   1  -2    0.00    0.03
  13   1   2    0.04    0.02
 -13   1  -2   -0.01    0.02
 -14  -1  -2    5.08    0.15
 -14  -1  -2    5.40    0.14
  14  -1   2    5.25    0.13
  14  -1   2    5.17    0.14
 -14   1  -2    5.15    0.15
 -14   1  -2    5.00    0.15
  14   1   2    5.25    0.14
  14   1   2    5.39    0.14
 -15  -1  -2    4.02    0.11
  15  -1   2    3.65    0.11
 -15  -1  -2    3.86    0.12
  15   1   2    4.06    0.11
 -15   1  -2    4.03    0.12
  15   1   2    4.05    0.12
 -15   1  -2    3.86    0.12
 -16  -1  -2   18.45    0.45
  16  -1   2   18.44    0.44
 -16  -1  -2   18.49    0.44
 -16   1  -2   18.54    0.45
 -16   1  -2   18.23    0.45
  16   1   2   18.04    0.43
  16   1   2   17.78    0.44
  17  -1   2    3.02    0.10
 -17  -1  -2    3.21    0.11
 -17  -1  -2    3.22    0.10
  17   1   2    3.13    0.10
  17   1   2    3.14    0.09
 -17   1  -2    3.02    0.11
 -17   1  -2    3.08    0.10
  18  -1   2    0.40    0.04
 -18  -1  -2    0.46    0.05
 -18  -1  -2    0.42    0.04
  18   1   2    0.40    0.04
 -18   1  -2    0.41    0.04
 -18   1  -2    0.33    0.04
  19  -1   2    0.35    0.04
 -19  -1  -2    0.36    0.05
  19   1   2    0.33    0.05
 -19   1  -2    0.40    0.05
 -19   1  -2    0.35    0.05
 -20  -1  -2    9.80    0.27
  20  -1   2    9.80    0.26
 -20   1  -2    9.51    0.27
  20   1   2   10.14    0.26
 -20   1  -2   10.00    0.26
 -21  -1  -2    0.13    0.04
  21  -1   2    0.10    0.04
 -21   1  -2    0.15    0.04
  21   1   2    0.15    0.04
 -21   1  -2    0.16    0.04
  22  -1   2    6.48    0.18
 -22  -1  -2    6.66    0.20
  22   1   2    6.23    0.19
 -22   1  -2    6.55    0.19
 -22   1  -2    6.28    0.19
  23  -1   2    2.67    0.10
 -23  -1  -2    2.70    0.11
 -23   1  -2    2.44    0.11
  23   1   2    2.68    0.11
  24  -1   2    1.11    0.08
 -24  -1  -2    0.89    0.07
  24   1   2    1.03    0.08
 -24   1  -2    1.01    0.08
 -25  -1  -2    1.76    0.10
  25  -1   2    1.89    0.09
  25   1   2    1.66    0.09
 -25   1  -2    1.65    0.09
  26  -1   2    3.87    0.14
 -26  -1  -2    3.95    0.15
  26   1   2    3.63    0.14
 -26   1  -2    3.97    0.14
  27  -1   2    0.70    0.07
 -27  -1  -2    0.73    0.07
  27   1   2    0.66    0.07
 -27   1  -2    0.68    0.07
  28  -1   2    0.40    0.06
 -28  -1  -2    0.39    0.06
 -28   1  -2    0.39    0.06
  28   1   2    0.37    0.06
 -29  -1  -2    3.11    0.14
  29  -1   2    3.07    0.13
  29   1   2    3.25    0.13
 -29   1  -2    2.96    0.13
  30  -1   2    0.44    0.07
 -30  -1  -2    0.44    0.07
  30   1   2    0.40    0.07
 -30   1  -2    0.46    0.07
 -31   1  -2    0.08    0.06
  32  -2  -2    0.69    0.08
 -32   2   2    0.63    0.08
 -31  -2   2    0.35    0.07
  31  -2  -2    0.34    0.06
  31   2  -2    0.40    0.07
 -31   2   2    0.42    0.07
 -30  -2   2    4.18    0.16
  30  -2  -2    4.19    0.15
 -30   2   2    4.19    0.16
  30   2  -2    4.40    0.16
  29  -2  -2    2.28    0.11
 -29  -2   2    2.32    0.11
 -29   2   2    2.20    0.12
  29   2  -2    2.48    0.11
  28  -2  -2    0.13    0.05
 -28  -2   2    0.12    0.05
  28   2  -2    0.05    0.05
 -28   2   2    0.07    0.05
  27  -2  -2    2.83    0.11
 -27  -2   2    3.06    0.13
 -27   2   2    3.07    0.13
  27   2  -2    3.17    0.12
 -26  -2   2    0.12    0.05
  26  -2  -2    0.01    0.04
  26   2  -2   -0.01    0.04
 -26   2   2   -0.03    0.05
  25  -2  -2    2.70    0.11
 -25  -2   2    2.77    0.12
  25   2  -2    2.64    0.11
 -25   2   2    2.82    0.12
  24  -2  -2    2.64    0.11
 -24  -2   2    3.05    0.12
 -24   2   2    2.84    0.12
 -24   2   2    2.92    0.12
  24   2  -2    3.08    0.11
 -23  -2   2    1.09    0.07
  23  -2  -2    1.25    0.07
  23   2  -2    1.25    0.07
 -23   2   2    1.14    0.08
 -23   2   2    1.15    0.08
 -22  -2   2    6.50    0.19
  22  -2  -2    6.36    0.18
 -22   2   2    6.79    0.19
 -22   2   2    6.61    0.19
  22   2  -2    6.42    0.19
  21  -2  -2   28.45    0.68
 -21  -2   2   29.67    0.71
 -21   2   2   28.71    0.71
 -21   2   2   28.82    0.70
  21   2  -2   28.27    0.68
  20  -2  -2    2.85    0.10
 -20  -2   2    2.78    0.11
 -20   2   2    2.62    0.10
  20   2  -2    2.66    0.10
 -20   2   2    2.75    0.11
 -19  -2   2    5.37    0.16
  19  -2  -2    5.42    0.15
 -19   2   2    5.41    0.16
 -19   2   2    5.56    0.17
  19   2  -2    5.51    0.16
 -18  -2   2    0.27    0.04
  18  -2  -2    0.26    0.04
 -18   2   2    0.26    0.04
  18   2  -2    0.27    0.04
 -18   2   2    0.24    0.04
 -17  -2   2   13.29    0.35
  17  -2  -2   13.24    0.33
 -17   2   2   13.63    0.35
  17   2  -2   14.55    0.33
  17   2  -2   13.36    0.33
  17   2  -2   13.93    0.33
 -17   2   2   13.50    0.34
 -16  -2   2    6.98    0.19
  16  -2  -2    6.86    0.18
  16   2  -2    6.41    0.18
 -16   2   2    6.83    0.19
  16   2  -2    6.69    0.17
 -16   2   2    6.66    0.19
  16   2  -2    6.99    0.17
 -15  -2   2    4.89    0.14
  15  -2  -2    4.86    0.13
  15   2  -2    4.98    0.13
 -15   2   2    4.43    0.14
  15   2  -2    4.85    0.13
 -15   2   2    4.97    0.14
  15   2  -2    4.80    0.14
  14  -2  -2   92.86    2.11
 -14  -2   2   90.39    2.19
 -14   2   2   93.08    2.15
  14   2  -2   93.92    2.14
  14   2  -2   97.67    2.14
  14   2  -2   91.22    2.11
 -13  -2   2   65.72    1.62
  13  -2  -2   67.86    1.56
 -13   2   2   70.74    1.59
 -13   2   2   66.31    1.62
  13   2  -2   70.56    1.57
  13   2  -2   67.88    1.56
  13   2  -2   71.83    1.59
  12  -2  -2   15.36    0.36
 -12  -2   2   15.23    0.37
  12   2  -2   14.89    0.36
  12   2  -2   14.66    0.36
  12   2  -2   16.14    0.35
 -12   2   2   15.01    0.37
 -12   2   2   14.15    0.37
 -11  -2   2    6.66    0.18
  11  -2  -2    6.82    0.17
  11   2  -2    6.88    0.17
  11   2  -2    7.14    0.17
 -11   2   2    6.76    0.18
 -10  -2   2   17.09    0.43
  10  -2  -2   18.37    0.41
  10   2  -2   17.08    0.42
  10   2  -2   18.20    0.41
 -10   2   2   17.47    0.43
  10   2  -2   18.25    0.42
 -10   2   2   17.67    0.43
  -9  -2   2    6.43    0.17
   9  -2  -2    6.97    0.17
  -9   2   2    6.56    0.17
   9   2  -2    7.05    0.16
   9   2  -2    6.76    0.17
  -9   2   2    6.77    0.18
   9   2  -2    6.72    0.17
   8  -2  -2   17.34    0.40
  -8   2   2   17.36    0.41
  -8   2   2   16.54    0.41
   8   2  -2   16.95    0.40
   8   2  -2   18.21    0.40
   8   2  -2   16.55    0.40
  -7  -2   2   22.25    0.55
   7   2  -2   23.32    0.54
  -7   2   2   23.93    0.53
  -7   2   2   22.91    0.55
  -7   2   2   22.26    0.55
   7   2  -2   23.43    0.54
   7   2  -2   24.69    0.54
   6  -2  -2   10.78    0.25
   6   2  -2   10.83    0.25
   6   2  -2   10.63    0.25
  -6   2   2   10.24    0.26
   6   2  -2   10.28    0.25
  -6   2   2   10.80    0.24
   5  -2  -2    4.32    0.11
   5   2  -2    4.44    0.11
   5   2  -2    4.28    0.10
   5   2  -2    4.41    0.11
  -5   2   2    4.08    0.11
  -5   2   2    4.28    0.10
  -4  -2   2   16.11    0.40
   4  -2  -2   16.73    0.38
   4   2  -2   17.15    0.38
  -4   2   2   16.83    0.40
   4   2  -2   17.12    0.39
  -4   2   2   15.84    0.39
   4   2  -2   16.94    0.39
  -4   2   2   16.84    0.38
   3  -2  -2    6.28    0.15
  -3  -2   2    6.50    0.15
  -3   2   2    6.46    0.15
   3   2  -2    6.48    0.15
  -3   2   2    6.10    0.16
   3   2  -2    6.28    0.15
   3   2  -2    6.30    0.15
   2  -2  -2  212.36    4.60
  -2  -2   2  195.88    5.01
   2   2  -2  204.34    4.56
   2   2  -2  191.32    4.81
  -2   2   2  187.58    4.92
  -2   2   2  194.72    4.77
  -2   2   2  205.34    4.68
   2   2  -2  198.48    4.52
  -1  -2   2  326.64    7.94
   1  -2  -2  324.03    8.05
   1   2  -2  289.43    7.85
  -1   2   2  348.60    7.57
  -1   2   2  316.92    7.93
  -1   2   2  330.35    7.59
   0  -2  -2   34.32    0.78
   0  -2   2   31.90    0.76
   0   2   2   32.22    0.76
   0   2   2   34.28    0.80
   0   2  -2   32.75    0.78
   0   2  -2   33.95    0.79
   0   2   2   33.83    0.76
   0   2  -2   33.69    0.76
  -1  -2  -2   44.48    0.99
  -1  -2  -2   41.58    1.01
   1  -2   2   41.95    0.98
  -1   2  -2   42.86    1.00
   1   2   2   42.00    0.98
   1   2   2   42.77    1.18
  -1   2  -2   42.29    0.96
  -1   2  -2   42.52    1.00
  -2  -2  -2    9.29    0.23
  -2  -2  -2    9.48    0.22
   2  -2   2    9.22    0.22
  -2   2  -2    9.55    0.22
   2   2   2    9.09    0.22
   2   2   2    9.42    0.22
  -2   2  -2    8.92    0.22
  -3  -2  -2    1.07    0.03
   3  -2   2    1.01    0.04
  -3  -2  -2    1.00    0.04
   3  -2   2    0.98    0.03
   3   2   2    1.05    0.04
  -3   2  -2    1.03    0.04
   3   2   2    0.97    0.04
  -3   2  -2    1.03    0.05
   4  -2   2   97.83    2.32
  -4  -2  -2  102.03    2.32
   4  -2   2  105.11    2.31
  -4  -2  -2  101.32    2.40
  -4   2  -2  104.66    2.39
   4   2   2  103.41    2.34
   4   2   2   96.78    2.30
  -4   2  -2   96.57    2.36
  -5  -2  -2   14.63    0.34
   5  -2   2   14.68    0.34
  -5  -2  -2   15.00    0.36
   5  -2   2   14.89    0.34
   5   2   2   14.92    0.35
   5   2   2   14.83    0.34
  -5   2  -2   14.39    0.35
  -5   2  -2   15.29    0.36
   6  -2   2    5.59    0.13
   6  -2   2    5.60    0.14
  -6  -2  -2    5.73    0.14
  -6  -2  -2    5.65    0.15
   6   2   2    5.78    0.14
   6   2   2    5.70    0.14
  -6   2  -2    5.75    0.15
  -6   2  -2    5.98    0.15
   7  -2   2   45.99    1.04
  -7  -2  -2   44.08    1.08
  -7  -2  -2   44.96    1.06
   7  -2   2   47.29    1.05
  -7   2  -2   45.91    1.06
  -7   2  -2   47.05    1.08
   7   2   2   46.37    1.05
   7   2   2   45.32    1.04
  -8  -2  -2    1.14    0.04
  -8  -2  -2    1.18    0.05
   8  -2   2    1.17    0.04
   8  -2   2    1.12    0.03
   8   2   2    1.12    0.04
   8   2   2    1.10    0.05
  -8   2  -2    1.12    0.05
  -8   2  -2    1.03    0.05
  -9  -2  -2   34.53    0.79
  -9  -2  -2   35.28    0.82
   9  -2   2   36.12    0.79
   9  -2   2   32.13    0.78
  -9   2  -2   34.16    0.81
   9   2   2   34.49    0.79
  -9   2  -2   33.57    0.80
 -10  -2  -2   75.99    1.75
  10   2   2   77.14    1.74
 -10   2  -2   77.13    1.79
 -10   2  -2   75.48    1.76
  10   2   2   74.84    1.72
 -11  -2  -2   45.72    1.05
  11   2   2   46.56    1.05
 -11   2  -2   45.69    1.08
  11   2   2   44.23    1.04
 -11   2  -2   46.33    1.07
  12  -2   2    2.87    0.09
 -12  -2  -2    2.97    0.09
 -12  -2  -2    2.97    0.08
 -12   2  -2    2.74    0.09
 -12   2  -2    2.80    0.09
  12   2   2    2.78    0.09
  12   2   2    2.76    0.09
 -13  -2  -2   33.59    0.78
  13  -2   2   34.09    0.75
 -13  -2  -2   32.64    0.76
  13   2   2   32.82    0.75
 -13   2  -2   32.36    0.77
  13   2   2   32.62    0.76
 -13   2  -2   30.02    0.78
  14  -2   2    0.11    0.03
 -14  -2  -2    0.12    0.03
 -14  -2  -2    0.12    0.02
 -14   2  -2    0.12    0.03
 -14   2  -2    0.15    0.03
  14   2   2    0.12    0.03
  14   2   2    0.13    0.03
 -15  -2  -2   20.29    0.48
  15  -2   2   19.84    0.48
 -15  -2  -2   20.26    0.50
  15   2   2   20.06    0.48
 -15   2  -2   20.15    0.50
  15   2   2   20.50    0.48
 -15   2  -2   20.80    0.49
 -16  -2  -2    6.13    0.16
  16  -2   2    5.94    0.16
 -16  -2  -2    5.59    0.17
  16   2   2    6.27    0.17
  16   2   2    6.41    0.16
 -16   2  -2    5.81    0.17
 -16   2  -2    6.24    0.17
 -17  -2  -2   11.42    0.30
  17  -2   2   11.21    0.28
  17   2   2   11.59    0.29
 -17   2  -2   11.19    0.29
  17   2   2   11.71    0.28
 -17   2  -2   10.77    0.29
  18  -2   2   10.56    0.26
 -18  -2  -2   10.51    0.28
  18   2   2   10.32    0.26
 -18   2  -2   10.27    0.27
  18   2   2   10.10    0.26
 -18   2  -2    9.98    0.27
 -19  -2  -2   20.01    0.49
  19  -2   2   19.84    0.47
 -19   2  -2   19.59    0.49
 -19   2  -2   19.29    0.48
  19   2   2   19.37    0.47
  20  -2   2    5.39    0.16
 -20  -2  -2    5.70    0.17
  20   2   2    5.57    0.17
 -20   2  -2    5.66    0.17
 -20   2  -2    5.58    0.17
  21  -2   2    0.25    0.04
 -21  -2  -2    0.31    0.05
 -21   2  -2    0.34    0.05
  21   2   2    0.32    0.05
 -21   2  -2    0.39    0.05
 -22  -2  -2    0.15    0.05
  22  -2   2    0.23    0.05
 -22   2  -2    0.15    0.04
  22   2   2    0.22    0.05
 -22   2  -2    0.17    0.05
  23  -2   2    0.53    0.05
 -23  -2  -2    0.47    0.06
 -23   2  -2    0.47    0.06
 -23   2  -2    0.58    0.06
  23   2   2    0.43    0.05
 -24  -2  -2    0.91    0.07
  24  -2   2    0.83    0.07
 -24   2  -2    0.94    0.08
  24   2   2    0.95    0.07
 -24   2  -2    0.88    0.08
  25  -2   2    4.66    0.16
 -25  -2  -2    5.26    0.17
  25   2   2    5.31    0.17
 -25   2  -2    5.07    0.17
 -26  -2  -2    0.43    0.06
  26  -2   2    0.50    0.06
  26   2   2    0.34    0.06
 -26   2  -2    0.34    0.06
 -27  -2  -2    1.19    0.09
  27  -2   2    1.14    0.08
 -27   2  -2    1.34    0.09
  27   2   2    1.48    0.09
 -28  -2  -2    0.02    0.06
  28  -2   2    0.07    0.05
 -28   2  -2    0.06    0.05
  28   2   2    0.02    0.05
  29  -2   2    0.63    0.07
 -29  -2  -2    0.63    0.08
 -29   2  -2    0.76    0.08
  29   2   2    0.69    0.07
 -30  -2  -2    0.16    0.07
  30  -2   2    0.22    0.06
  30   2   2    0.25    0.06
 -30   2  -2    0.33    0.06
  31  -3  -2    1.64    0.10
 -31  -3   2    1.75    0.11
  31   3  -2    1.61    0.10
 -31   3   2    1.55    0.11
  30  -3  -2    0.12    0.06
 -30  -3   2    0.18    0.06
  30   3  -2    0.14    0.05
 -30   3   2    0.11    0.06
 -29  -3   2    0.06    0.05
  29  -3  -2    0.03    0.05
  29   3  -2    0.09    0.05
 -29   3   2    0.05    0.05
  28  -3  -2    2.27    0.11
 -28  -3   2    2.26    0.11
  28   3  -2    2.17    0.10
 -28   3   2    2.19    0.11
 -27  -3   2    0.83    0.08
  27  -3  -2    0.79    0.07
 -27   3   2    0.68    0.07
  27   3  -2    0.86    0.07
  26  -3  -2    0.17    0.05
 -26  -3   2    0.29    0.05
 -26   3   2    0.25    0.06
  26   3  -2    0.18    0.05
  25  -3  -2    1.65    0.08
 -25  -3   2    1.72    0.09
 -25   3   2    1.87    0.09
  25   3  -2    1.74    0.09
 -25   3   2    1.75    0.09
 -24  -3   2    0.01    0.05
  24  -3  -2    0.07    0.04
 -24   3   2    0.09    0.05
 -24   3   2    0.04    0.05
  24   3  -2    0.06    0.04
 -23  -3   2    4.10    0.14
  23  -3  -2    4.08    0.13
 -23   3   2    4.36    0.15
  23   3  -2    4.36    0.14
 -23   3   2    3.95    0.14
 -22  -3   2    0.06    0.04
  22  -3  -2    0.08    0.04
 -22   3   2    0.04    0.04
 -22   3   2   -0.01    0.04
  22   3  -2    0.03    0.04
 -21  -3   2    0.53    0.05
  21  -3  -2    0.50    0.05
  21   3  -2    0.38    0.05
 -21   3   2    0.51    0.06
 -21   3   2    0.48    0.06
  20  -3  -2    0.56    0.05
 -20  -3   2    0.60    0.05
  20   3  -2    0.55    0.05
 -20   3   2    0.62    0.06
 -20   3   2    0.58    0.06
  19  -3  -2    0.82    0.06
 -19  -3   2    0.77    0.06
 -19   3   2    0.83    0.07
  19   3  -2    0.88    0.06
 -19   3   2    0.76    0.06
  19   3  -2    0.81    0.06
  18  -3  -2    4.72    0.14
 -18  -3   2    4.77    0.15
  18   3  -2    4.84    0.14
 -18   3   2    4.46    0.14
  18   3  -2    4.83    0.14
 -18   3   2    4.59    0.15
 -17  -3   2   13.96    0.35
  17  -3  -2   14.12    0.34
 -17   3   2   13.57    0.35
  17   3  -2   13.47    0.34
  17   3  -2   14.27    0.34
 -17   3   2   13.30    0.35
 -16  -3   2    1.58    0.07
  16  -3  -2    1.84    0.07
 -16   3   2    1.57    0.07
  16   3  -2    1.59    0.07
  16   3  -2    1.81    0.07
 -16   3   2    1.86    0.08
  15  -3  -2    4.00    0.12
 -15  -3   2    4.03    0.12
 -15   3   2    3.83    0.12
  15   3  -2    4.15    0.12
 -15   3   2    4.17    0.13
  15   3  -2    4.38    0.11
  15   3  -2    3.88    0.12
  14  -3  -2    2.05    0.07
 -14  -3   2    2.10    0.08
 -14   3   2    2.07    0.08
  14   3  -2    2.07    0.08
  14   3  -2    2.03    0.06
  14   3  -2    1.94    0.08
 -14   3   2    2.10    0.08
 -13  -3   2    4.69    0.13
  13  -3  -2    4.74    0.12
  13   3  -2    4.48    0.11
  13   3  -2    4.34    0.13
 -13   3   2    4.57    0.13
 -13   3   2    4.40    0.14
  13   3  -2    4.45    0.13
  12  -3  -2    5.12    0.13
 -12  -3   2    5.10    0.14
  12   3  -2    5.08    0.12
  12   3  -2    4.81    0.14
 -12   3   2    5.02    0.14
  12   3  -2    4.85    0.14
 -12   3   2    4.81    0.14
  11  -3  -2    2.45    0.08
 -11  -3   2    2.34    0.08
  11   3  -2    2.41    0.08
  11   3  -2    2.33    0.08
  11   3  -2    2.35    0.06
 -11   3   2    2.38    0.08
 -11   3   2    2.40    0.09
  10  -3  -2    4.18    0.11
 -10  -3   2    4.09    0.12
  10   3  -2    4.21    0.12
  10   3  -2    4.28    0.10
 -10   3   2    4.16    0.12
 -10   3   2    4.17    0.12
  10   3  -2    4.30    0.12
   9  -3  -2    4.01    0.11
  -9  -3   2    4.15    0.12
  -9   3   2    4.25    0.10
  -9   3   2    4.18    0.12
   9   3  -2    4.29    0.11
   9   3  -2    3.92    0.11
  -9   3   2    4.19    0.12
   8  -3  -2    0.04    0.02
  -8  -3   2    0.04    0.02
   8   3  -2    0.02    0.02
   8   3  -2    0.03    0.02
  -8   3   2    0.02    0.02
  -8   3   2    0.04    0.02
  -8   3   2    0.02    0.01
  -7  -3   2    0.11    0.02
   7  -3  -2    0.19    0.02
  -7   3   2    0.16    0.01
   7   3  -2    0.13    0.02
  -7   3   2    0.16    0.02
   7   3  -2    0.15    0.02
  -7   3   2    0.12    0.02
  -6  -3   2    2.81    0.08
   6  -3  -2    2.95    0.08
   6   3  -2    2.91    0.08
  -6   3   2    2.82    0.08
  -6   3   2    3.00    0.07
  -6   3   2    2.78    0.09
   6   3  -2    2.86    0.08
   5  -3  -2    1.09    0.04
  -5  -3   2    1.07    0.04
  -5   3   2    1.07    0.05
   5   3  -2    1.09    0.03
  -5   3   2    1.00    0.04
   5   3  -2    1.16    0.05
   5   3  -2    1.02    0.04
  -5   3   2    1.09    0.04
   4  -3  -2   22.86    0.54
  -4  -3   2   23.84    0.56
   4   3  -2   22.80    0.55
  -4   3   2   24.37    0.54
  -4   3   2   23.85    0.55
   4   3  -2   24.11    0.54
   4   3  -2   23.47    0.54
  -4   3   2   23.82    0.56
  -3  -3   2    4.06    0.10
   3   3  -2    4.02    0.10
  -3   3   2    3.71    0.10
  -3   3   2    4.08    0.10
  -3   3   2    4.02    0.11
   3   3  -2    3.74    0.10
   3   3  -2    3.93    0.10
  -2  -3   2    0.87    0.04
  -2   3   2    0.88    0.04
  -2   3   2    0.79    0.03
  -2   3   2    0.77    0.04
   2   3  -2    0.88    0.03
  -2   3   2    0.84    0.04
   2   3  -2    0.92    0.04
   2   3  -2    0.76    0.04
   1  -3  -2   52.50    1.19
   1   3  -2   52.85    1.17
   1   3  -2   48.47    1.18
  -1   3   2   48.38    1.17
  -1   3   2   52.17    1.21
   1   3  -2   52.59    1.16
  -1   3   2   52.70    1.16
   0  -3  -2   31.46    0.71
   0   3  -2   31.59    0.71
   0   3  -2   30.34    0.70
   0   3   2   31.10    0.70
   0   3   2   31.36    0.73
   0   3   2   29.02    0.71
   0   3  -2   30.29    0.72
   0   3  -2   30.58    0.71
  -1  -3  -2   20.03    0.47
  -1  -3  -2   19.94    0.46
  -1   3  -2   20.28    0.47
  -1   3  -2   19.42    0.46
   1   3   2   19.37    0.45
  -1   3  -2   20.11    0.47
   1   3   2   19.91    0.46
  -2  -3  -2   16.40    0.39
   2  -3   2   16.56    0.38
  -2  -3  -2   16.45    0.38
   2   3   2   16.78    0.38
   2   3   2   15.65    0.38
  -2   3  -2   15.30    0.38
  -2   3  -2   16.09    0.38
  -2   3  -2   16.83    0.39
   3  -3   2    9.93    0.24
  -3  -3  -2    9.63    0.25
  -3  -3  -2   10.43    0.24
   3   3   2    9.84    0.24
   3   3   2   10.26    0.24
  -3   3  -2   10.16    0.25
  -3   3  -2   10.55    0.25
   4  -3   2    5.75    0.14
   4  -3   2    5.82    0.14
  -4  -3  -2    5.58    0.15
  -4  -3  -2    5.91    0.14
   4   3   2    6.04    0.14
   4   3   2    5.65    0.15
  -4   3  -2    5.62    0.15
  -4   3  -2    5.99    0.15
   5  -3   2    0.13    0.02
  -5  -3  -2    0.15    0.01
   5  -3   2    0.14    0.01
  -5  -3  -2    0.12    0.02
  -5   3  -2    0.16    0.02
   5   3   2    0.12    0.02
  -5   3  -2    0.15    0.03
   5   3   2    0.16    0.02
   6  -3   2    0.54    0.03
  -6  -3  -2    0.52    0.02
  -6  -3  -2    0.51    0.04
   6  -3   2    0.48    0.02
   6   3   2    0.48    0.03
   6   3   2    0.52    0.03
  -6   3  -2    0.56    0.03
  -6   3  -2    0.48    0.04
   7  -3   2    0.58    0.03
  -7  -3  -2    0.58    0.02
  -7  -3  -2    0.59    0.04
   7  -3   2    0.57    0.02
  -7   3  -2    0.60    0.04
   7   3   2    0.59    0.04
   7   3   2    0.58    0.04
  -7   3  -2    0.57    0.04
  -8  -3  -2    0.20    0.03
   8  -3   2    0.15    0.02
  -8  -3  -2    0.16    0.01
   8  -3   2    0.18    0.01
   8   3   2    0.13    0.03
  -8   3  -2    0.19    0.03
   8   3   2    0.15    0.02
  -8   3  -2    0.15    0.03
   9  -3   2    0.06    0.02
  -9  -3  -2    0.05    0.01
  -9  -3  -2    0.09    0.03
   9   3   2    0.05    0.02
   9   3   2    0.05    0.02
  -9   3  -2    0.04    0.02
  -9   3  -2    0.04    0.03
 -10  -3  -2    0.65    0.03
 -10  -3  -2    0.74    0.05
  10  -3   2    0.74    0.04
  10   3   2    0.69    0.05
 -10   3  -2    0.70    0.04
 -10   3  -2    0.58    0.05
  10   3   2    0.66    0.04
 -11  -3  -2    3.04    0.08
  11  -3   2    3.11    0.09
 -11  -3  -2    3.09    0.10
 -11   3  -2    2.92    0.10
 -11   3  -2    2.95    0.09
  11   3   2    3.08    0.09
  11   3   2    3.01    0.09
 -12  -3  -2   -0.01    0.02
  12  -3   2    0.00    0.02
 -12  -3  -2    0.00    0.02
 -12   3  -2   -0.03    0.02
 -12   3  -2   -0.02    0.03
  12   3   2   -0.01    0.02
  12   3   2    0.01    0.02
  13  -3   2    1.01    0.05
 -13  -3  -2    0.99    0.06
 -13  -3  -2    0.98    0.04
 -13   3  -2    0.97    0.06
  13   3   2    1.00    0.05
 -13   3  -2    1.10    0.06
  13   3   2    0.96    0.05
 -14  -3  -2    0.04    0.03
 -14  -3  -2    0.04    0.02
  14  -3   2    0.00    0.02
  14   3   2    0.00    0.02
  14   3   2    0.01    0.03
 -14   3  -2    0.04    0.03
 -14   3  -2   -0.02    0.03
 -15  -3  -2    0.20    0.03
  15  -3   2    0.19    0.03
 -15   3  -2    0.18    0.04
  15   3   2    0.19    0.03
 -15   3  -2    0.27    0.03
  15   3   2    0.20    0.03
  16  -3   2    4.06    0.12
 -16  -3  -2    4.10    0.13
 -16   3  -2    4.25    0.13
 -16   3  -2    4.27    0.13
  16   3   2    4.23    0.12
  16   3   2    4.15    0.13
 -17  -3  -2    0.07    0.04
  17  -3   2    0.09    0.03
 -17   3  -2    0.09    0.03
  17   3   2    0.03    0.03
  17   3   2    0.03    0.03
 -17   3  -2    0.09    0.04
  18  -3   2    0.70    0.06
 -18  -3  -2    0.65    0.06
 -18   3  -2    0.68    0.06
 -18   3  -2    0.66    0.06
  18   3   2    0.69    0.05
  18   3   2    0.67    0.05
  19  -3   2    0.40    0.05
 -19  -3  -2    0.30    0.05
 -19   3  -2    0.34    0.05
 -19   3  -2    0.31    0.04
  19   3   2    0.41    0.05
  19   3   2    0.44    0.04
  20  -3   2    0.12    0.04
 -20  -3  -2    0.21    0.05
  20   3   2    0.13    0.04
 -20   3  -2    0.10    0.04
 -20   3  -2    0.15    0.04
  21  -3   2    2.27    0.09
 -21  -3  -2    2.23    0.10
 -21   3  -2    2.26    0.10
 -21   3  -2    2.20    0.09
  21   3   2    2.34    0.10
  22  -3   2    1.22    0.08
 -22  -3  -2    1.51    0.09
 -22   3  -2    1.43    0.08
  22   3   2    1.39    0.08
 -22   3  -2    1.24    0.08
  23  -3   2    0.17    0.05
 -23  -3  -2    0.13    0.05
  23   3   2    0.08    0.05
 -23   3  -2    0.22    0.05
 -23   3  -2    0.11    0.05
 -24  -3  -2    0.55    0.06
  24  -3   2    0.48    0.06
 -24   3  -2    0.61    0.07
 -24   3  -2    0.59    0.06
  24   3   2    0.56    0.06
 -25  -3  -2    0.03    0.05
  25  -3   2   -0.05    0.04
  25   3   2   -0.05    0.05
 -25   3  -2   -0.02    0.04
 -25   3  -2   -0.02    0.05
  26  -3   2   -0.05    0.05
 -26  -3  -2   -0.01    0.05
  26   3   2   -0.03    0.05
 -26   3  -2    0.07    0.05
 -26   3  -2    0.00    0.05
  27  -3   2    0.38    0.06
 -27  -3  -2    0.41    0.07
  27   3   2    0.49    0.07
 -27   3  -2    0.48    0.07
  28  -3   2    0.01    0.05
 -28  -3  -2   -0.03    0.05
 -28   3  -2    0.02    0.05
  28   3   2    0.08    0.05
  29  -3   2    1.23    0.09
 -29  -3  -2    1.15    0.10
 -29   3  -2    1.18    0.09
  29   3   2    1.23    0.09
 -30  -3  -2    1.53    0.10
  30  -3   2    1.57    0.10
  30   3   2    1.64    0.11
 -30   3  -2    1.74    0.11
 -31  -4   2    2.44    0.13
  31  -4  -2    2.45    0.12
 -31   4   2    2.62    0.13
  31   4  -2    2.46    0.13
  30  -4  -2    0.15    0.05
 -30  -4   2    0.20    0.07
 -30   4   2    0.26    0.06
  30   4  -2    0.17    0.06
 -29  -4   2    1.01    0.09
  29  -4  -2    1.06    0.09
  29  -4  -2    0.91    0.08
  29   4  -2    0.95    0.08
 -29   4   2    0.99    0.09
 -28  -4   2    1.14    0.09
  28  -4  -2    1.11    0.08
  28   4  -2    1.08    0.09
 -28   4   2    1.27    0.09
  27  -4  -2    0.05    0.05
 -27  -4   2    0.13    0.05
 -27   4   2    0.12    0.05
  27   4  -2    0.13    0.05
 -26  -4   2    0.08    0.05
  26  -4  -2    0.02    0.04
  26   4  -2    0.02    0.04
 -26   4   2    0.10    0.05
 -26   4   2    0.02    0.05
  25  -4  -2    4.59    0.15
 -25  -4   2    4.61    0.16
  25   4  -2    4.40    0.15
 -25   4   2    4.27    0.15
 -25   4   2    4.82    0.16
 -24  -4   2    8.65    0.25
  24  -4  -2    8.92    0.24
  24   4  -2    8.93    0.25
 -24   4   2    8.61    0.25
 -24   4   2    9.24    0.26
 -23  -4   2    4.14    0.15
  23  -4  -2    4.35    0.14
 -23   4   2    4.27    0.15
 -23   4   2    4.59    0.15
  23   4  -2    4.50    0.15
  22  -4  -2    3.09    0.11
 -22  -4   2    3.12    0.12
 -22   4   2    2.87    0.11
 -22   4   2    3.11    0.12
  22   4  -2    3.14    0.12
  21  -4  -2    0.42    0.05
 -21  -4   2    0.49    0.06
 -21   4   2    0.37    0.05
 -21   4   2    0.38    0.05
  21   4  -2    0.46    0.05
  21   4  -2    0.49    0.05
 -20  -4   2    1.93    0.09
  20  -4  -2    2.00    0.08
  20   4  -2    1.96    0.08
 -20   4   2    1.94    0.09
 -20   4   2    1.95    0.09
  20   4  -2    1.97    0.08
 -19  -4   2    1.88    0.09
  19  -4  -2    1.73    0.07
 -19   4   2    1.80    0.09
  19   4  -2    1.79    0.08
 -19   4   2    1.67    0.08
  19   4  -2    1.78    0.08
  18  -4  -2    1.40    0.07
 -18  -4   2    1.53    0.08
  18   4  -2    1.53    0.07
  18   4  -2    1.52    0.07
 -18   4   2    1.44    0.07
 -18   4   2    1.43    0.07
  17  -4  -2    0.15    0.03
 -17  -4   2    0.13    0.03
  17   4  -2    0.16    0.03
 -17   4   2    0.13    0.04
  17   4  -2    0.09    0.03
 -17   4   2    0.14    0.04
  16  -4  -2   27.04    0.63
 -16  -4   2   27.36    0.66
 -16   4   2   26.85    0.66
 -16   4   2   27.24    0.66
  16   4  -2   27.03    0.64
  16   4  -2   27.27    0.64
 -15  -4   2   10.99    0.28
  15  -4  -2   10.72    0.26
  15   4  -2   10.87    0.27
 -15   4   2   10.63    0.28
  15   4  -2   10.12    0.27
 -15   4   2   10.78    0.28
  14  -4  -2   97.27    2.22
 -14  -4   2   97.88    2.31
 -14   4   2   96.73    2.31
  14   4  -2   97.61    2.23
 -14   4   2  100.84    2.28
  14   4  -2   98.93    2.25
 -13  -4   2   13.34    0.34
  13  -4  -2   13.60    0.32
  13   4  -2   13.65    0.33
 -13   4   2   13.53    0.34
 -13   4   2   12.72    0.34
  13   4  -2   13.43    0.33
 -12  -4   2    0.26    0.03
  12  -4  -2    0.28    0.03
 -12   4   2    0.18    0.03
 -12   4   2    0.25    0.03
  12   4  -2    0.24    0.03
  12   4  -2    0.22    0.03
 -11  -4   2    0.03    0.02
  11  -4  -2    0.04    0.02
  11   4  -2   -0.02    0.02
 -11   4   2   -0.01    0.03
  11   4  -2    0.00    0.03
 -11   4   2   -0.03    0.02
 -10  -4   2   21.42    0.53
  10  -4  -2   21.61    0.51
  10   4  -2   22.03    0.52
 -10   4   2   22.70    0.50
 -10   4   2   21.49    0.53
  10   4  -2   21.93    0.51
 -10   4   2   21.98    0.53
   9  -4  -2   50.88    1.17
  -9  -4   2   51.90    1.21
  -9   4   2   51.86    1.22
  -9   4   2   50.08    1.20
   9   4  -2   52.04    1.19
  -9   4   2   52.50    1.17
   9   4  -2   51.19    1.18
   8  -4  -2   53.05    1.22
  -8  -4   2   53.30    1.25
  -8   4   2   51.51    1.26
   8   4  -2   54.90    1.23
  -8   4   2   52.70    1.24
  -8   4   2   54.36    1.21
   7  -4  -2    0.02    0.01
  -7  -4   2    0.03    0.02
   7   4  -2    0.01    0.02
   7   4  -2    0.01    0.02
  -7   4   2    0.03    0.02
  -7   4   2    0.04    0.02
  -7   4   2   -0.03    0.02
  -6  -4   2   18.86    0.45
   6  -4  -2   18.43    0.43
  -6   4   2   19.52    0.43
   6   4  -2   18.82    0.44
  -6   4   2   18.31    0.45
   6   4  -2   19.15    0.43
   6   4  -2   18.31    0.44
  -6   4   2   18.43    0.45
   5  -4  -2    2.71    0.08
  -5  -4   2    2.80    0.08
  -5   4   2    2.98    0.08
   5   4  -2    2.81    0.08
  -5   4   2    2.81    0.09
  -5   4   2    2.77    0.09
   5   4  -2    2.94    0.07
   5   4  -2    2.81    0.08
   4  -4  -2    3.52    0.09
  -4  -4   2    3.49    0.10
   4   4  -2    3.66    0.10
   4   4  -2    3.72    0.09
  -4   4   2    3.29    0.10
   4   4  -2    3.59    0.10
  -4   4   2    3.61    0.09
  -4   4   2    3.54    0.10
  -3  -4   2  126.59    3.60
   3   4  -2  125.39    2.91
   3   4  -2  129.49    2.93
  -3   4   2  125.92    3.01
   3   4  -2  124.07    2.92
  -3   4   2  131.17    2.92
  -3   4   2  128.37    2.89
  -3   4   2  120.88    3.76
  -2  -4   2    0.59    0.03
  -2   4   2    0.59    0.04
   2   4  -2    0.64    0.04
   2   4  -2    0.56    0.03
  -2   4   2    0.58    0.04
   2   4  -2    0.57    0.04
  -2   4   2    0.65    0.04
  -2   4   2    0.56    0.03
  -1   4   2  149.24    3.48
   1   4  -2  152.15    3.56
  -1   4   2  152.45    3.44
   1   4  -2  147.71    3.50
  -1   4   2  151.02    3.58
   1   4  -2  153.90    3.48
   1   4  -2  148.02    3.45
   0  -4  -2    5.60    0.14
   0   4  -2    5.38    0.14
   0   4  -2    5.59    0.14
   0   4  -2    5.56    0.14
   0   4   2    5.46    0.14
   0   4   2    5.47    0.14
   0   4  -2    5.41    0.14
   0   4   2    5.39    0.15
  -1  -4  -2   97.75    2.22
  -1  -4  -2   95.77    2.29
   1   4   2   96.98    2.18
   1   4   2   94.60    2.20
  -1   4  -2   97.05    2.20
  -1   4  -2   92.74    2.24
  -1   4  -2   94.79    2.22
  -1   4  -2   95.23    2.25
  -2  -4  -2    3.96    0.11
  -2  -4  -2    4.17    0.10
  -2   4  -2    4.13    0.11
   2   4   2    4.10    0.11
   2   4   2    4.31    0.11
  -2   4  -2    4.16    0.11
  -2   4  -2    4.20    0.11
  -2   4  -2    4.26    0.11
  -3  -4  -2    0.20    0.02
  -3  -4  -2    0.22    0.02
  -3   4  -2    0.25    0.02
   3   4   2    0.22    0.02
  -3   4  -2    0.21    0.03
  -3   4  -2    0.19    0.02
   3   4   2    0.18    0.02
   4  -4   2   19.39    0.44
   4  -4   2   18.39    0.44
  -4  -4  -2   19.06    0.46
  -4  -4  -2   19.65    0.44
  -4   4  -2   18.68    0.46
   4   4   2   19.39    0.45
   4   4   2   19.66    0.44
  -4   4  -2   18.96    0.46
  -5  -4  -2   29.14    0.71
   5  -4   2   30.15    0.68
  -5  -4  -2   30.13    0.68
   5  -4   2   29.41    0.68
  -5   4  -2   29.71    0.70
  -5   4  -2   28.23    0.70
   5   4   2   30.84    0.68
   5   4   2   29.88    0.69
   6  -4   2    8.13    0.19
  -6  -4  -2    8.24    0.19
  -6  -4  -2    7.95    0.21
   6  -4   2    8.28    0.20
   6   4   2    8.18    0.20
  -6   4  -2    8.11    0.21
   6   4   2    8.46    0.21
  -6   4  -2    8.08    0.21
   7  -4   2   51.36    1.14
  -7  -4  -2   49.66    1.19
   7  -4   2   49.44    1.15
  -7   4  -2   50.38    1.18
   7   4   2   52.15    1.16
  -7   4  -2   50.59    1.17
   7   4   2   48.32    1.14
  -8  -4  -2   10.56    0.26
   8  -4   2   10.53    0.24
   8  -4   2   10.27    0.25
   8   4   2   10.62    0.26
  -8   4  -2   10.14    0.26
   8   4   2   10.46    0.25
  -8   4  -2   10.63    0.26
  -9  -4  -2    5.22    0.14
   9  -4   2    4.93    0.12
   9  -4   2    4.91    0.13
   9   4   2    5.11    0.13
  -9   4  -2    4.93    0.14
   9   4   2    4.91    0.14
  -9   4  -2    4.98    0.14
 -10  -4  -2    2.81    0.09
  10  -4   2    2.84    0.09
  10  -4   2    2.93    0.07
  10   4   2    3.03    0.09
 -10   4  -2    3.07    0.09
 -10   4  -2    2.62    0.10
  10   4   2    3.09    0.09
 -11  -4  -2    0.56    0.05
 -11  -4  -2    0.48    0.02
  11  -4   2    0.47    0.04
 -11   4  -2    0.50    0.04
  11   4   2    0.51    0.05
 -11   4  -2    0.53    0.05
  11   4   2    0.48    0.04
  12  -4   2   13.48    0.32
  12   4   2   12.89    0.32
  12   4   2   13.16    0.32
 -12   4  -2   13.40    0.33
 -12   4  -2   12.36    0.33
  13  -4   2   11.48    0.28
  13   4   2   11.58    0.28
  13   4   2   11.66    0.29
 -13   4  -2   11.51    0.30
 -13   4  -2   11.28    0.29
  14  -4   2    0.53    0.04
 -14  -4  -2    0.51    0.05
  14   4   2    0.53    0.04
 -14   4  -2    0.47    0.05
 -14   4  -2    0.55    0.05
  14   4   2    0.55    0.04
  15  -4   2    2.26    0.08
 -15  -4  -2    2.25    0.09
  15   4   2    2.31    0.09
 -15   4  -2    2.30    0.09
  15   4   2    2.28    0.08
 -15   4  -2    2.30    0.08
  16  -4   2    0.23    0.04
 -16  -4  -2    0.20    0.04
  16   4   2    0.23    0.04
 -16   4  -2    0.22    0.04
  16   4   2    0.22    0.04
 -16   4  -2    0.28    0.04
 -17  -4  -2    1.54    0.08
  17  -4   2    1.49    0.07
  17   4   2    1.64    0.07
 -17   4  -2    1.53    0.08
  17   4   2    1.52    0.07
 -17   4  -2    1.63    0.08
  18  -4   2    5.34    0.15
 -18  -4  -2    5.45    0.16
 -18   4  -2    5.28    0.16
  18   4   2    5.27    0.16
  18   4   2    5.33    0.15
 -18   4  -2    5.13    0.16
 -19  -4  -2    0.78    0.06
  19  -4   2    0.70    0.06
  19   4   2    0.72    0.05
 -19   4  -2    0.73    0.06
 -19   4  -2    0.73    0.06
  19   4   2    0.79    0.06
 -20  -4  -2    1.45    0.08
  20  -4   2    1.42    0.07
  20   4   2    1.24    0.07
  20   4   2    1.42    0.08
 -20   4  -2    1.47    0.08
 -20   4  -2    1.47    0.08
 -21  -4  -2    1.28    0.08
  21  -4   2    1.19    0.07
 -21   4  -2    1.25    0.08
  21   4   2    1.18    0.07
 -21   4  -2    1.16    0.08
 -22  -4  -2    2.25    0.10
  22  -4   2    2.27    0.10
 -22   4  -2    1.97    0.09
  22   4   2    2.58    0.10
 -22   4  -2    2.31    0.11
  23  -4   2    3.40    0.12
 -23  -4  -2    2.98    0.12
  23   4   2    3.31    0.12
 -23   4  -2    3.34    0.13
 -23   4  -2    3.37    0.13
 -24  -4  -2    3.25    0.13
  24  -4   2    3.32    0.13
 -24   4  -2    3.49    0.13
  24   4   2    3.42    0.13
 -24   4  -2    3.41    0.13
 -25  -4  -2    2.13    0.10
  25  -4   2    2.22    0.10
 -25   4  -2    2.19    0.11
 -25   4  -2    2.33    0.11
  25   4   2    2.40    0.11
  26  -4   2    1.12    0.08
 -26  -4  -2    1.17    0.08
  26   4   2    1.09    0.09
 -26   4  -2    1.16    0.09
 -26   4  -2    1.04    0.08
  27  -4   2    6.62    0.20
 -27  -4  -2    6.84    0.22
 -27   4  -2    6.77    0.21
 -27   4  -2    6.71    0.22
  27   4   2    6.76    0.21
 -28  -4  -2    0.13    0.06
  28  -4   2    0.09    0.05
 -28   4  -2    0.08    0.06
  28   4   2    0.03    0.05
  29  -4   2    6.93    0.21
 -29  -4  -2    6.49    0.22
  29   4   2    7.14    0.22
 -29   4  -2    6.97    0.22
 -30   4  -2    1.96    0.11
  31  -5  -2    0.01    0.05
 -31   5   2    0.00    0.06
  30  -5  -2    0.47    0.08
 -30  -5   2    0.52    0.08
  30  -5  -2    0.39    0.07
  30   5  -2    0.58    0.08
 -30   5   2    0.56    0.08
 -29  -5   2    1.64    0.10
  29  -5  -2    1.99    0.10
  29  -5  -2    1.44    0.11
 -29   5   2    1.69    0.11
  29   5  -2    1.71    0.10
 -28  -5   2    0.74    0.08
  28  -5  -2    0.93    0.08
  28   5  -2    0.77    0.08
 -28   5   2    0.90    0.08
  27  -5  -2    1.67    0.09
 -27  -5   2    1.75    0.10
  27   5  -2    1.68    0.10
 -27   5   2    1.72    0.10
  26  -5  -2    0.12    0.05
 -26  -5   2    0.07    0.05
  26   5  -2    0.04    0.05
 -26   5   2    0.09    0.05
 -26   5   2    0.08    0.05
  25  -5  -2    0.19    0.05
 -25  -5   2    0.17    0.05
 -25   5   2    0.10    0.05
  25   5  -2    0.24    0.05
 -25   5   2    0.10    0.05
  24  -5  -2    0.15    0.04
 -24  -5   2    0.08    0.05
 -24   5   2    0.11    0.05
  24   5  -2    0.17    0.05
 -24   5   2    0.14    0.05
 -23  -5   2    0.11    0.05
  23  -5  -2    0.12    0.04
 -23   5   2    0.18    0.05
 -23   5   2    0.05    0.05
  23   5  -2    0.17    0.05
 -22  -5   2    0.59    0.06
  22  -5  -2    0.49    0.05
  22   5  -2    0.44    0.05
 -22   5   2    0.58    0.06
 -22   5   2    0.58    0.06
  22   5  -2    0.50    0.06
 -21  -5   2    0.26    0.05
  21  -5  -2    0.16    0.04
  21   5  -2    0.21    0.04
 -21   5   2    0.16    0.05
 -21   5   2    0.26    0.05
  21   5  -2    0.23    0.04
 -20  -5   2    2.79    0.11
  20  -5  -2    2.73    0.10
  20   5  -2    2.90    0.11
 -20   5   2    2.90    0.11
  20   5  -2    2.80    0.10
 -20   5   2    2.74    0.11
 -19  -5   2    0.06    0.04
  19  -5  -2    0.03    0.03
  19   5  -2    0.00    0.04
  19   5  -2    0.07    0.04
 -19   5   2    0.03    0.04
 -19   5   2    0.07    0.04
 -18  -5   2    0.07    0.04
  18  -5  -2    0.07    0.03
 -18   5   2   -0.02    0.04
  18   5  -2   -0.02    0.04
 -18   5   2    0.03    0.04
  18   5  -2    0.02    0.04
 -17  -5   2    2.15    0.09
  17  -5  -2    2.14    0.08
 -17   5   2    2.23    0.09
  17   5  -2    2.08    0.08
 -17   5   2    2.07    0.09
  17   5  -2    1.99    0.08
  16  -5  -2    0.55    0.05
 -16  -5   2    0.55    0.05
  16   5  -2    0.52    0.05
  16   5  -2    0.46    0.05
 -16   5   2    0.48    0.05
 -16   5   2    0.51    0.05
  15  -5  -2    0.56    0.04
 -15  -5   2    0.54    0.05
  15   5  -2    0.47    0.05
  15   5  -2    0.57    0.05
 -15   5   2    0.53    0.05
 -15   5   2    0.60    0.06
 -14  -5   2    0.07    0.03
  14  -5  -2    0.06    0.03
 -14   5   2    0.03    0.03
  14   5  -2    0.06    0.03
  14   5  -2    0.06    0.03
 -14   5   2    0.04    0.04
  13  -5  -2    5.43    0.15
 -13  -5   2    5.57    0.16
 -13   5   2    5.40    0.16
  13   5  -2    5.37    0.15
 -13   5   2    5.40    0.16
  13   5  -2    5.32    0.15
 -12  -5   2   13.98    0.34
  12  -5  -2   13.83    0.33
  12   5  -2   13.02    0.34
 -12   5   2   14.11    0.35
 -12   5   2   13.74    0.35
  12   5  -2   13.86    0.34
 -11  -5   2    4.31    0.12
  11  -5  -2    4.24    0.12
  11   5  -2    4.23    0.12
  11   5  -2    4.01    0.12
 -11   5   2    4.06    0.13
 -11   5   2    4.33    0.10
 -11   5   2    4.12    0.12
  10  -5  -2    0.04    0.02
 -10  -5   2    0.04    0.03
 -10   5   2   -0.03    0.03
  10   5  -2   -0.02    0.02
  10   5  -2    0.01    0.02
 -10   5   2    0.02    0.01
 -10   5   2    0.01    0.02
  -9  -5   2    6.00    0.16
   9  -5  -2    5.99    0.15
   9   5  -2    6.15    0.16
   9   5  -2    6.01    0.16
  -9   5   2    5.80    0.16
  -9   5   2    6.25    0.15
  -9   5   2    5.87    0.17
  -8  -5   2    1.93    0.07
   8  -5  -2    1.92    0.06
  -8   5   2    1.96    0.06
  -8   5   2    1.85    0.08
  -8   5   2    2.03    0.07
   8   5  -2    1.90    0.07
   8   5  -2    1.78    0.07
   7  -5  -2    2.69    0.08
  -7  -5   2    2.60    0.08
  -7   5   2    2.80    0.08
  -7   5   2    2.68    0.09
   7   5  -2    2.61    0.08
   7   5  -2    2.70    0.07
  -7   5   2    2.65    0.09
   7   5  -2    2.61    0.09
   6  -5  -2    0.56    0.03
  -6  -5   2    0.59    0.04
   6   5  -2    0.58    0.04
  -6   5   2    0.57    0.04
   6   5  -2    0.57    0.03
  -6   5   2    0.50    0.04
  -6   5   2    0.62    0.05
   6   5  -2    0.54    0.04
   5  -5  -2   11.91    0.29
  -5  -5   2   12.28    0.30
   5   5  -2   12.79    0.29
  -5   5   2   12.51    0.31
  -5   5   2   12.76    0.30
   5   5  -2   11.87    0.30
   5   5  -2   12.71    0.30
  -5   5   2   12.28    0.31
  -4  -5   2    1.75    0.06
  -4   5   2    1.64    0.06
  -4   5   2    1.72    0.07
  -4   5   2    1.73    0.07
  -4   5   2    1.78    0.06
   4   5  -2    1.72    0.05
   4   5  -2    1.77    0.06
   4   5  -2    1.75    0.07
  -3  -5   2   13.53    0.33
   3   5  -2   13.66    0.32
  -3   5   2   13.65    0.33
   3   5  -2   14.17    0.33
  -3   5   2   13.06    0.34
   3   5  -2   13.58    0.32
  -3   5   2   13.29    0.32
  -3   5   2   13.79    0.32
  -2  -5   2    9.99    0.24
   2   5  -2    9.55    0.24
  -2   5   2    9.83    0.25
   2   5  -2    9.85    0.24
   2   5  -2    9.56    0.24
  -2   5   2    9.76    0.24
  -2   5   2   10.25    0.24
  -2   5   2    9.99    0.24
  -1   5   2    2.68    0.08
  -1   5   2    2.57    0.09
   1   5  -2    2.69    0.08
   1   5  -2    2.52    0.08
  -1   5   2    2.66    0.08
  -1   5   2    2.69    0.08
   1   5  -2    2.89    0.08
   0  -5  -2    1.51    0.05
   0   5  -2    1.56    0.06
   0   5   2    1.32    0.06
   0   5   2    1.53    0.05
   0   5  -2    1.48    0.06
   0   5   2    1.50    0.06
   0   5  -2    1.39    0.05
   0   5  -2    1.48    0.06
  -1  -5  -2    0.21    0.03
  -1  -5  -2    0.21    0.02
   1   5   2    0.15    0.03
  -1   5  -2    0.22    0.02
  -1   5  -2    0.20    0.03
  -1   5  -2    0.20    0.03
   1   5   2    0.20    0.02
  -1   5  -2    0.19    0.02
  -2  -5  -2    0.19    0.02
  -2  -5  -2    0.20    0.03
   2   5   2    0.19    0.02
  -2   5  -2    0.16    0.03
   2   5   2    0.22    0.03
  -2   5  -2    0.21    0.02
  -2   5  -2    0.23    0.03
  -2   5  -2    0.19    0.02
  -3  -5  -2    0.21    0.03
  -3  -5  -2    0.21    0.02
   3   5   2    0.24    0.02
  -3   5  -2    0.17    0.02
  -3   5  -2    0.22    0.03
   3   5   2    0.19    0.03
  -3   5  -2    0.17    0.02
  -3   5  -2    0.21    0.03
  -4  -5  -2    1.00    0.05
  -4  -5  -2    0.94    0.04
   4   5   2    1.01    0.05
  -4   5  -2    0.92    0.05
  -4   5  -2    1.03    0.05
   4   5   2    1.01    0.05
  -5  -5  -2    0.19    0.02
   5  -5   2    0.20    0.02
   5  -5   2    0.15    0.02
  -5  -5  -2    0.21    0.03
   5   5   2    0.18    0.03
  -5   5  -2    0.17    0.03
  -5   5  -2    0.17    0.02
   5   5   2    0.18    0.03
  -6  -5  -2    7.20    0.19
  -6  -5  -2    7.10    0.17
   6  -5   2    6.93    0.17
   6  -5   2    7.39    0.18
   6   5   2    7.27    0.18
  -6   5  -2    7.06    0.19
   6   5   2    7.35    0.19
  -6   5  -2    7.00    0.19
   7  -5   2    0.22    0.03
  -7  -5  -2    0.22    0.03
   7  -5   2    0.17    0.02
  -7   5  -2    0.18    0.03
  -7   5  -2    0.18    0.03
   7   5   2    0.22    0.03
   7   5   2    0.19    0.03
  -8  -5  -2    4.32    0.13
   8  -5   2    4.31    0.11
   8  -5   2    4.47    0.12
   8   5   2    4.41    0.13
  -8   5  -2    4.52    0.13
   8   5   2    4.61    0.12
  -8   5  -2    4.30    0.13
  -9  -5  -2    4.02    0.12
   9  -5   2    4.19    0.12
   9  -5   2    3.93    0.10
  -9   5  -2    3.91    0.12
   9   5   2    4.10    0.12
  -9   5  -2    4.25    0.12
   9   5   2    3.96    0.12
 -10  -5  -2    0.67    0.05
  10  -5   2    0.69    0.05
  10  -5   2    0.52    0.03
 -10   5  -2    0.57    0.05
  10   5   2    0.49    0.04
  10   5   2    0.68    0.05
 -10   5  -2    0.75    0.05
 -11  -5  -2    0.80    0.05
  11  -5   2    0.84    0.05
 -11   5  -2    0.93    0.05
  11   5   2    0.69    0.06
 -11   5  -2    0.76    0.06
  11   5   2    0.90    0.05
 -12  -5  -2    3.61    0.12
  12  -5   2    3.56    0.11
  12   5   2    3.48    0.11
 -12   5  -2    3.67    0.11
  12   5   2    3.62    0.11
 -12   5  -2    3.38    0.12
 -13  -5  -2    1.85    0.08
  13  -5   2    1.65    0.07
 -13   5  -2    1.70    0.08
 -13   5  -2    1.75    0.07
  13   5   2    1.63    0.07
  13   5   2    1.86    0.07
 -14  -5  -2    0.47    0.05
  14  -5   2    0.46    0.04
 -14   5  -2    0.44    0.04
  14   5   2    0.42    0.05
  14   5   2    0.50    0.04
 -14   5  -2    0.37    0.05
 -15  -5  -2    4.68    0.15
  15  -5   2    4.53    0.14
  15   5   2    4.75    0.14
 -15   5  -2    4.69    0.15
  15   5   2    4.88    0.14
 -15   5  -2    4.64    0.14
  16  -5   2    2.85    0.10
 -16  -5  -2    2.69    0.10
  16   5   2    3.02    0.10
 -16   5  -2    2.69    0.11
 -16   5  -2    3.00    0.10
  16   5   2    2.80    0.10
  17  -5   2    0.17    0.04
 -17  -5  -2    0.18    0.05
  17   5   2    0.16    0.04
 -17   5  -2    0.20    0.04
 -17   5  -2    0.06    0.04
  17   5   2    0.12    0.04
 -18  -5  -2    0.63    0.06
  18  -5   2    0.67    0.06
  18   5   2    0.73    0.06
  18   5   2    0.66    0.06
 -18   5  -2    0.70    0.06
 -18   5  -2    0.64    0.06
 -19  -5  -2    0.45    0.05
  19  -5   2    0.45    0.05
  19   5   2    0.51    0.05
 -19   5  -2    0.42    0.06
 -19   5  -2    0.56    0.05
  19   5   2    0.48    0.05
 -20  -5  -2    0.02    0.04
  20  -5   2    0.06    0.04
  20   5   2   -0.08    0.04
 -20   5  -2   -0.08    0.04
 -20   5  -2    0.03    0.04
  20   5   2    0.03    0.04
 -21  -5  -2    0.54    0.06
  21  -5   2    0.69    0.06
 -21   5  -2    0.50    0.06
  21   5   2    0.57    0.06
 -21   5  -2    0.60    0.06
  21   5   2    0.58    0.06
  22  -5   2    1.16    0.07
 -22  -5  -2    1.13    0.08
  22   5   2    1.21    0.08
 -22   5  -2    1.06    0.08
 -22   5  -2    1.26    0.08
  23  -5   2    0.31    0.05
 -23  -5  -2    0.36    0.06
 -23   5  -2    0.35    0.06
  23   5   2    0.40    0.05
 -23   5  -2    0.37    0.06
  24  -5   2    1.56    0.09
 -24  -5  -2    1.49    0.10
 -24   5  -2    1.72    0.09
 -24   5  -2    1.68    0.10
  24   5   2    1.63    0.09
 -25  -5  -2    2.06    0.11
  25  -5   2    2.24    0.10
 -25   5  -2    2.24    0.11
  25   5   2    2.28    0.11
 -25   5  -2    2.03    0.10
  26  -5   2    0.02    0.05
 -26  -5  -2    0.02    0.05
  26   5   2   -0.04    0.05
 -26   5  -2    0.01    0.05
 -26   5  -2   -0.12    0.04
 -27  -5  -2    1.72    0.11
  27  -5   2    1.63    0.10
 -27   5  -2    1.49    0.10
  27   5   2    1.68    0.10
 -27   5  -2    1.56    0.09
  28  -5   2    2.14    0.11
 -28  -5  -2    2.15    0.12
 -28   5  -2    1.98    0.12
  28   5   2    1.95    0.11
 -28   5  -2    2.24    0.12
 -29  -5  -2    0.09    0.07
  29  -5   2    0.06    0.06
 -29   5  -2    0.10    0.06
 -29   5  -2    0.10    0.06
  29   5   2    0.04    0.06
 -30   5  -2    1.26    0.10
  31  -6  -2    1.43    0.11
  30  -6  -2    0.85    0.08
  30  -6  -2    0.83    0.09
 -30   6   2    0.90    0.09
  30   6  -2    0.79    0.08
  29  -6  -2    1.31    0.11
  29  -6  -2    1.42    0.10
 -29  -6   2    1.45    0.11
  29   6  -2    1.52    0.11
 -29   6   2    1.38    0.10
 -28  -6   2    2.66    0.13
  28  -6  -2    2.78    0.12
  28   6  -2    2.59    0.12
 -28   6   2    2.60    0.13
 -27  -6   2    1.00    0.08
  27  -6  -2    0.82    0.07
  27   6  -2    0.94    0.08
 -27   6   2    1.01    0.09
  26  -6  -2    0.83    0.07
 -26  -6   2    0.83    0.08
 -26   6   2    0.79    0.08
 -26   6   2    0.84    0.08
  26   6  -2    1.01    0.08
 -25  -6   2    0.05    0.05
  25  -6  -2    0.05    0.04
 -25   6   2    0.16    0.05
 -25   6   2    0.17    0.06
  25   6  -2    0.16    0.05
 -24  -6   2    6.86    0.22
  24  -6  -2    7.04    0.20
  24   6  -2    7.28    0.22
 -24   6   2    7.51    0.23
 -24   6   2    6.98    0.22
 -23  -6   2    0.23    0.05
  23  -6  -2    0.15    0.05
 -23   6   2    0.21    0.05
  23   6  -2    0.25    0.05
 -23   6   2    0.28    0.05
 -22  -6   2    0.02    0.04
  22  -6  -2    0.01    0.04
  22   6  -2   -0.03    0.04
 -22   6   2    0.00    0.05
  22   6  -2   -0.06    0.04
 -22   6   2   -0.06    0.04
  21  -6  -2    0.04    0.04
 -21  -6   2    0.06    0.05
  21   6  -2    0.04    0.04
  21   6  -2    0.01    0.04
 -21   6   2    0.06    0.05
 -21   6   2    0.03    0.04
  20  -6  -2    1.60    0.08
 -20  -6   2    1.83    0.09
  20   6  -2    1.56    0.08
 -20   6   2    1.56    0.09
 -20   6   2    1.57    0.08
  20   6  -2    1.64    0.08
 -19  -6   2   11.32    0.31
  19  -6  -2   11.55    0.29
  19   6  -2   11.65    0.30
 -19   6   2   11.77    0.31
 -19   6   2   11.99    0.31
  19   6  -2   10.77    0.30
  18  -6  -2    7.82    0.21
 -18  -6   2    7.53    0.22
  18   6  -2    7.97    0.22
 -18   6   2    7.90    0.23
 -18   6   2    7.70    0.22
  18   6  -2    7.67    0.22
 -17  -6   2    0.13    0.04
  17  -6  -2    0.11    0.03
  17   6  -2    0.12    0.04
  17   6  -2    0.13    0.04
 -17   6   2    0.13    0.04
 -17   6   2    0.11    0.05
 -16  -6   2    6.57    0.19
  16  -6  -2    6.66    0.18
 -16   6   2    6.79    0.19
  16   6  -2    6.68    0.19
  16   6  -2    6.55    0.19
 -16   6   2    6.84    0.20
  15  -6  -2   20.07    0.48
 -15  -6   2   20.19    0.50
  15   6  -2   20.47    0.49
 -15   6   2   19.49    0.50
 -15   6   2   19.93    0.50
  15   6  -2   20.09    0.49
 -14  -6   2   18.57    0.46
  14  -6  -2   18.22    0.44
 -14   6   2   18.18    0.46
  14   6  -2   18.78    0.45
 -14   6   2   18.46    0.46
  14   6  -2   17.72    0.45
 -13  -6   2   11.43    0.30
  13  -6  -2   11.47    0.28
  13   6  -2   11.66    0.29
 -13   6   2   11.30    0.30
  13   6  -2   11.67    0.30
 -13   6   2   11.73    0.30
  12  -6  -2   47.65    1.11
 -12  -6   2   49.46    1.15
  12   6  -2   49.50    1.13
  12   6  -2   47.34    1.12
 -12   6   2   48.18    1.16
 -12   6   2   48.86    1.14
  11  -6  -2   19.80    0.47
 -11  -6   2   19.39    0.49
  11   6  -2   19.84    0.48
 -11   6   2   20.70    0.47
 -11   6   2   20.28    0.50
  11   6  -2   20.69    0.49
 -11   6   2   19.86    0.49
  10  -6  -2    3.83    0.11
 -10  -6   2    3.88    0.12
  10   6  -2    3.72    0.12
  10   6  -2    3.63    0.11
 -10   6   2    3.95    0.10
 -10   6   2    3.68    0.12
 -10   6   2    3.57    0.12
   9  -6  -2   10.00    0.24
  -9  -6   2    9.89    0.26
   9   6  -2   10.06    0.25
  -9   6   2   10.22    0.24
  -9   6   2   10.05    0.26
   9   6  -2   10.03    0.26
  -9   6   2    9.77    0.26
  -8  -6   2   12.67    0.31
   8  -6  -2   12.17    0.29
  -8   6   2   12.38    0.31
  -8   6   2   11.77    0.31
   8   6  -2   12.39    0.30
   8   6  -2   12.19    0.31
  -8   6   2   12.70    0.29
   7  -6  -2    0.05    0.02
  -7  -6   2    0.10    0.02
  -7   6   2    0.09    0.03
   7   6  -2    0.10    0.01
  -7   6   2    0.07    0.03
   7   6  -2    0.05    0.03
   7   6  -2    0.09    0.03
  -7   6   2    0.08    0.02
   6  -6  -2   10.30    0.25
  -6  -6   2   10.60    0.27
   6   6  -2   10.81    0.25
  -6   6   2   10.56    0.27
   6   6  -2   10.40    0.26
  -6   6   2   10.47    0.27
  -6   6   2   10.98    0.26
   6   6  -2   10.54    0.27
  -5  -6   2    1.46    0.06
   5   6  -2    1.33    0.05
  -5   6   2    1.36    0.06
  -5   6   2    1.32    0.06
   5   6  -2    1.40    0.06
   5   6  -2    1.41    0.06
  -5   6   2    1.34    0.06
  -4  -6   2    6.74    0.18
  -4   6   2    6.79    0.18
   4   6  -2    6.78    0.18
  -4   6   2    6.60    0.17
  -4   6   2    6.78    0.18
  -4   6   2    6.84    0.17
   4   6  -2    6.68    0.17
   4   6  -2    6.82    0.18
  -3  -6   2    5.64    0.16
   3   6  -2    5.75    0.16
   3   6  -2    5.95    0.16
  -3   6   2    5.79    0.15
  -3   6   2    5.85    0.16
   3   6  -2    5.89    0.15
  -3   6   2    6.04    0.16
  -3   6   2    6.10    0.16
  -2  -6   2   89.84    2.10
   2   6  -2   93.17    2.06
  -2   6   2   89.85    2.04
  -2   6   2   89.85    2.11
  -2   6   2   87.79    2.05
   2   6  -2   87.12    2.06
  -2   6   2   89.29    2.06
   2   6  -2   89.12    2.04
  -1   6   2   19.54    0.48
  -1   6   2   18.76    0.46
   1   6  -2   20.05    0.46
   1   6  -2   19.11    0.46
   1   6  -2   19.27    0.46
  -1   6   2   19.90    0.45
   0  -6  -2    6.95    0.17
   0   6  -2    6.67    0.17
   0   6  -2    6.41    0.17
   0   6   2    6.65    0.17
   0   6  -2    6.70    0.18
   0   6   2    6.80    0.18
   0   6   2    6.59    0.18
   0   6  -2    6.83    0.18
  -1  -6  -2    5.24    0.15
  -1  -6  -2    5.22    0.13
  -1   6  -2    5.17    0.14
   1   6   2    5.16    0.14
   1   6   2    5.06    0.14
  -1   6  -2    5.07    0.14
  -1   6  -2    5.19    0.14
  -1   6  -2    5.30    0.14
  -2  -6  -2    7.92    0.20
  -2  -6  -2    7.70    0.19
  -2   6  -2    7.57    0.20
  -2   6  -2    7.73    0.19
  -2   6  -2    7.56    0.20
  -2   6  -2    7.79    0.20
   2   6   2    7.50    0.19
   2   6   2    7.44    0.20
  -3  -6  -2    0.06    0.02
  -3  -6  -2    0.08    0.02
   3   6   2    0.03    0.02
  -3   6  -2    0.05    0.02
  -3   6  -2    0.07    0.02
  -3   6  -2    0.06    0.02
   3   6   2    0.06    0.03
  -3   6  -2    0.04    0.03
  -4  -6  -2    4.37    0.12
  -4  -6  -2    4.33    0.11
  -4   6  -2    4.23    0.12
   4   6   2    4.17    0.12
   4   6   2    4.21    0.12
  -4   6  -2    3.99    0.12
  -4   6  -2    4.18    0.12
   5  -6   2   14.34    0.35
  -5  -6  -2   15.21    0.34
   5  -6   2   14.51    0.35
  -5  -6  -2   14.51    0.36
  -5   6  -2   14.47    0.36
   5   6   2   14.87    0.35
   5   6   2   14.71    0.36
  -5   6  -2   14.56    0.36
  -6  -6  -2    0.01    0.02
   6  -6   2   -0.01    0.02
   6  -6   2    0.02    0.02
  -6  -6  -2    0.03    0.01
   6   6   2    0.01    0.02
   6   6   2    0.01    0.03
  -6   6  -2    0.00    0.03
  -6   6  -2   -0.02    0.02
  -7  -6  -2   48.59    1.08
   7  -6   2   46.52    1.08
  -7  -6  -2   47.09    1.12
   7  -6   2   46.22    1.08
   7   6   2   48.09    1.08
  -7   6  -2   45.72    1.10
  -7   6  -2   47.11    1.12
   7   6   2   47.15    1.09
   8  -6   2   15.44    0.37
   8  -6   2   15.39    0.37
  -8  -6  -2   16.05    0.39
   8   6   2   15.51    0.38
   8   6   2   16.05    0.38
  -8   6  -2   16.07    0.39
  -8   6  -2   15.27    0.39
   9  -6   2    0.72    0.05
  -9  -6  -2    0.69    0.05
   9  -6   2    0.67    0.03
  -9   6  -2    0.56    0.05
  -9   6  -2    0.69    0.05
   9   6   2    0.65    0.05
   9   6   2    0.66    0.05
  10  -6   2   39.37    0.92
 -10  -6  -2   39.78    0.95
 -10   6  -2   38.69    0.94
 -10   6  -2   40.31    0.95
  10   6   2   41.59    0.92
  10   6   2   39.50    0.93
  11  -6   2    5.50    0.15
 -11  -6  -2    5.15    0.15
  11   6   2    5.28    0.15
 -11   6  -2    5.38    0.15
  11   6   2    5.18    0.15
 -11   6  -2    5.46    0.16
 -12  -6  -2    3.48    0.11
  12  -6   2    3.22    0.10
 -12   6  -2    3.06    0.11
 -12   6  -2    3.35    0.11
  12   6   2    3.33    0.11
  12   6   2    3.42    0.11
 -13  -6  -2    5.08    0.15
  13  -6   2    4.75    0.14
 -13   6  -2    4.79    0.15
  13   6   2    4.82    0.15
 -13   6  -2    4.89    0.15
  13   6   2    4.81    0.14
  14  -6   2    0.55    0.05
 -14  -6  -2    0.55    0.05
  14   6   2    0.47    0.05
 -14   6  -2    0.47    0.05
 -14   6  -2    0.54    0.05
  14   6   2    0.51    0.05
 -15  -6  -2    6.32    0.19
  15  -6   2    6.55    0.18
 -15   6  -2    6.83    0.19
 -15   6  -2    6.67    0.19
  15   6   2    6.49    0.19
  15   6   2    6.28    0.18
  16  -6   2    7.61    0.20
 -16  -6  -2    7.43    0.21
  16   6   2    6.95    0.20
  16   6   2    7.27    0.20
 -16   6  -2    7.66    0.21
 -16   6  -2    7.20    0.21
 -17  -6  -2    9.78    0.27
  17  -6   2   10.13    0.26
  17   6   2    9.88    0.26
 -17   6  -2    9.89    0.27
 -17   6  -2    9.97    0.27
  17   6   2    9.79    0.26
  18  -6   2    0.36    0.05
 -18  -6  -2    0.23    0.05
  18   6   2    0.29    0.05
 -18   6  -2    0.30    0.05
 -18   6  -2    0.29    0.05
  18   6   2    0.30    0.05
  19  -6   2    0.35    0.05
 -19  -6  -2    0.41    0.06
 -19   6  -2    0.38    0.05
  19   6   2    0.36    0.05
  19   6   2    0.27    0.05
 -19   6  -2    0.40    0.06
  20  -6   2    0.23    0.05
 -20  -6  -2    0.26    0.05
 -20   6  -2    0.10    0.05
  20   6   2    0.21    0.05
 -20   6  -2    0.20    0.04
  20   6   2    0.20    0.05
 -21  -6  -2    0.35    0.05
  21  -6   2    0.30    0.05
  21   6   2    0.34    0.05
  21   6   2    0.28    0.05
 -21   6  -2    0.37    0.06
 -21   6  -2    0.39    0.06
 -22  -6  -2    0.19    0.06
  22  -6   2    0.22    0.05
  22   6   2    0.24    0.05
 -22   6  -2    0.29    0.05
 -22   6  -2    0.23    0.06
 -23  -6  -2   11.29    0.32
  23  -6   2   11.38    0.30
  23   6   2   11.15    0.30
 -23   6  -2   11.14    0.31
 -23   6  -2   11.42    0.32
 -24  -6  -2    4.57    0.17
  24  -6   2    4.89    0.16
 -24   6  -2    5.04    0.17
  24   6   2    4.59    0.16
 -24   6  -2    4.98    0.18
 -25  -6  -2    0.06    0.05
  25  -6   2    0.11    0.05
 -25   6  -2    0.14    0.05
  25   6   2    0.13    0.05
 -25   6  -2    0.16    0.06
 -26  -6  -2    1.28    0.10
  26  -6   2    1.15    0.09
 -26   6  -2    1.39    0.10
  26   6   2    1.35    0.09
 -26   6  -2    1.25    0.09
 -27  -6  -2   -0.03    0.06
  27  -6   2    0.08    0.06
 -27   6  -2    0.13    0.06
  27   6   2    0.07    0.06
 -27   6  -2    0.14    0.05
 -28  -6  -2    0.21    0.07
  28  -6   2    0.22    0.06
 -28   6  -2    0.13    0.07
 -28   6  -2    0.19    0.06
  28   6   2    0.11    0.06
 -29   6  -2    0.14    0.06
 -29   6  -2    0.04    0.06
 -30   6  -2    1.24    0.11
  30  -7  -2    0.04    0.06
  30  -7  -2   -0.07    0.06
 -30   7   2   -0.03    0.05
  29  -7  -2    1.38    0.10
 -29  -7   2    1.60    0.11
  29  -7  -2    1.48    0.09
 -29   7   2    1.63    0.11
  29   7  -2    1.58    0.11
 -28  -7   2    5.93    0.20
  28  -7  -2    5.71    0.18
  28   7  -2    5.52    0.20
 -28   7   2    5.62    0.20
 -27  -7   2    1.10    0.09
  27  -7  -2    1.00    0.08
 -27   7   2    1.05    0.08
  27   7  -2    1.07    0.09
  26  -7  -2    2.68    0.11
 -26  -7   2    2.75    0.13
 -26   7   2    3.17    0.14
 -26   7   2    2.86    0.13
  26   7  -2    3.07    0.13
  25  -7  -2    1.59    0.09
 -25  -7   2    1.76    0.10
 -25   7   2    1.76    0.10
  25   7  -2    1.65    0.09
 -25   7   2    1.47    0.10
 -24  -7   2    0.03    0.05
  24  -7  -2    0.05    0.05
 -24   7   2    0.04    0.05
 -24   7   2    0.12    0.06
  24   7  -2    0.08    0.05
  23  -7  -2    0.15    0.05
 -23  -7   2    0.25    0.06
 -23   7   2    0.21    0.05
 -23   7   2    0.25    0.06
  23   7  -2    0.19    0.05
  23   7  -2    0.13    0.05
  22  -7  -2    0.11    0.04
 -22  -7   2    0.10    0.05
  22   7  -2    0.11    0.05
 -22   7   2    0.12    0.05
  22   7  -2    0.05    0.05
 -22   7   2    0.03    0.05
 -21  -7   2    0.16    0.05
  21  -7  -2    0.18    0.04
  21   7  -2    0.14    0.05
 -21   7   2    0.22    0.05
  21   7  -2    0.21    0.05
 -21   7   2    0.14    0.06
 -20  -7   2    1.99    0.10
  20  -7  -2    1.87    0.09
 -20   7   2    1.79    0.10
 -20   7   2    2.00    0.10
  20   7  -2    1.80    0.09
  20   7  -2    1.95    0.09
 -19  -7   2    1.16    0.07
  19  -7  -2    1.40    0.07
  19   7  -2    1.10    0.08
 -19   7   2    1.11    0.08
  19   7  -2    1.11    0.08
 -19   7   2    0.99    0.08
 -18  -7   2    0.07    0.04
  18  -7  -2    0.17    0.04
  18   7  -2    0.05    0.05
 -18   7   2   -0.01    0.04
  18   7  -2    0.11    0.04
 -18   7   2    0.04    0.04
 -17  -7   2    0.30    0.05
  17  -7  -2    0.28    0.04
  17   7  -2    0.19    0.04
 -17   7   2    0.30    0.05
 -17   7   2    0.23    0.05
  17   7  -2    0.19    0.05
 -16  -7   2    0.42    0.05
  16  -7  -2    0.48    0.05
  16   7  -2    0.46    0.05
 -16   7   2    0.46    0.06
  16   7  -2    0.53    0.05
 -16   7   2    0.45    0.05
 -15  -7   2    0.43    0.05
  15  -7  -2    0.50    0.04
 -15   7   2    0.39    0.05
  15   7  -2    0.36    0.05
 -15   7   2    0.38    0.06
  15   7  -2    0.44    0.05
 -14  -7   2    0.29    0.04
  14  -7  -2    0.32    0.04
 -14   7   2    0.22    0.05
  14   7  -2    0.24    0.05
 -14   7   2    0.32    0.04
  14   7  -2    0.28    0.04
  13  -7  -2   -0.01    0.03
 -13  -7   2   -0.08    0.03
  13   7  -2   -0.04    0.04
 -13   7   2   -0.02    0.04
 -13   7   2    0.00    0.03
  13   7  -2   -0.02    0.03
 -12  -7   2    0.71    0.05
  12  -7  -2    0.78    0.05
 -12   7   2    0.74    0.05
  12   7  -2    0.75    0.05
  12   7  -2    0.57    0.05
 -12   7   2    0.71    0.06
 -11  -7   2    0.77    0.06
  11  -7  -2    0.74    0.05
  11   7  -2    0.71    0.06
  11   7  -2    0.75    0.06
 -11   7   2    0.81    0.06
 -11   7   2    0.78    0.06
  10  -7  -2    0.10    0.03
 -10  -7   2    0.13    0.03
  10   7  -2    0.15    0.03
 -10   7   2    0.10    0.02
 -10   7   2    0.09    0.04
 -10   7   2    0.11    0.03
  10   7  -2    0.06    0.03
   9  -7  -2    3.55    0.11
  -9  -7   2    3.73    0.11
  -9   7   2    3.65    0.12
  -9   7   2    3.67    0.12
  -9   7   2    3.96    0.11
   9   7  -2    3.70    0.12
   9   7  -2    3.77    0.12
  -8  -7   2    0.29    0.03
   8  -7  -2    0.28    0.03
   8   7  -2    0.27    0.04
   8   7  -2    0.25    0.04
  -8   7   2    0.31    0.03
  -8   7   2    0.27    0.04
  -8   7   2    0.23    0.04
   7  -7  -2    0.02    0.02
  -7  -7   2    0.05    0.03
  -7   7   2    0.04    0.03
   7   7  -2   -0.01    0.03
   7   7  -2    0.02    0.03
  -7   7   2   -0.03    0.03
  -7   7   2    0.04    0.02
  -6  -7   2    1.22    0.05
   6  -7  -2    1.21    0.05
   6   7  -2    1.17    0.05
   6   7  -2    1.23    0.06
   6   7  -2    1.31    0.07
  -6   7   2    1.19    0.06
  -6   7   2    1.29    0.06
  -6   7   2    1.24    0.07
  -5  -7   2    1.24    0.06
  -5   7   2    1.26    0.06
  -5   7   2    1.25    0.06
   5   7  -2    1.23    0.05
   5   7  -2    1.12    0.06
  -5   7   2    1.09    0.06
   5   7  -2    1.24    0.06
  -4  -7   2    2.70    0.09
   4   7  -2    2.57    0.09
   4   7  -2    2.59    0.09
  -4   7   2    2.52    0.09
  -4   7   2    2.75    0.09
   4   7  -2    2.70    0.08
  -4   7   2    2.64    0.09
  -4   7   2    2.67    0.08
  -3  -7   2    3.43    0.10
  -3   7   2    3.20    0.10
   3   7  -2    3.33    0.10
   3   7  -2    3.30    0.10
  -3   7   2    3.53    0.11
   3   7  -2    3.47    0.11
  -3   7   2    3.40    0.11
  -3   7   2    3.53    0.10
  -2  -7   2    1.33    0.06
   2   7  -2    1.19    0.06
  -2   7   2    1.35    0.06
  -2   7   2    1.38    0.07
   2   7  -2    1.27    0.06
  -2   7   2    1.22    0.06
  -2   7   2    1.38    0.06
   2   7  -2    1.35    0.06
  -1  -7   2    0.74    0.05
   1   7  -2    0.84    0.05
  -1   7   2    0.81    0.05
   1   7  -2    0.69    0.05
   1   7  -2    0.78    0.05
  -1   7   2    0.78    0.05
  -1   7   2    0.78    0.05
   0  -7  -2   -0.01    0.02
   0   7   2    0.01    0.03
   0   7   2    0.07    0.02
   0   7  -2    0.00    0.03
   0   7  -2    0.02    0.02
   0   7  -2    0.01    0.02
   0   7   2   -0.01    0.03
   0   7  -2    0.02    0.03
  -1  -7  -2    1.16    0.06
  -1  -7  -2    1.09    0.05
  -1   7  -2    1.02    0.06
  -1   7  -2    1.23    0.06
   1   7   2    1.07    0.05
  -1   7  -2    1.12    0.06
  -1   7  -2    1.04    0.06
   1   7   2    1.06    0.06
  -2  -7  -2    0.25    0.03
  -2  -7  -2    0.30    0.03
  -2   7  -2    0.30    0.04
  -2   7  -2    0.32    0.04
  -2   7  -2    0.26    0.03
  -2   7  -2    0.31    0.03
   2   7   2    0.29    0.03
   2   7   2    0.28    0.03
  -3  -7  -2    1.66    0.06
  -3  -7  -2    1.87    0.08
  -3   7  -2    2.03    0.07
   3   7   2    1.75    0.07
   3   7   2    1.96    0.07
  -3   7  -2    1.74    0.07
  -3   7  -2    1.93    0.07
  -3   7  -2    1.84    0.07
  -4  -7  -2    2.07    0.08
  -4  -7  -2    2.05    0.06
   4   7   2    2.02    0.07
  -4   7  -2    2.11    0.08
   4   7   2    1.98    0.08
  -4   7  -2    2.10    0.08
  -4   7  -2    2.19    0.07
  -4   7  -2    2.05    0.08
  -5  -7  -2    0.01    0.02
  -5  -7  -2    0.03    0.03
  -5   7  -2    0.00    0.02
   5   7   2   -0.01    0.02
  -5   7  -2    0.00    0.03
   5   7   2   -0.01    0.03
  -6  -7  -2    3.02    0.10
  -6  -7  -2    3.08    0.08
   6  -7   2    3.16    0.09
   6  -7   2    3.02    0.10
  -6   7  -2    3.03    0.10
   6   7   2    3.18    0.10
  -6   7  -2    3.15    0.11
   6   7   2    3.23    0.11
  -7  -7  -2    4.28    0.13
   7  -7   2    4.36    0.12
   7  -7   2    4.36    0.12
   7   7   2    4.44    0.13
  -7   7  -2    4.27    0.13
  -7   7  -2    4.43    0.13
   7   7   2    4.46    0.13
  -8  -7  -2    0.22    0.04
   8  -7   2    0.16    0.02
   8  -7   2    0.19    0.03
  -8   7  -2    0.21    0.04
   8   7   2    0.22    0.03
   8   7   2    0.23    0.04
  -8   7  -2    0.17    0.03
   9  -7   2    0.24    0.03
  -9  -7  -2    0.26    0.04
   9  -7   2    0.21    0.02
   9   7   2    0.27    0.04
  -9   7  -2    0.22    0.03
   9   7   2    0.20    0.04
  -9   7  -2    0.19    0.04
  10  -7   2    0.04    0.03
 -10  -7  -2    0.02    0.03
 -10   7  -2   -0.02    0.04
 -10   7  -2    0.03    0.03
  10   7   2    0.01    0.03
  10   7   2    0.01    0.03
 -11  -7  -2    0.03    0.03
  11  -7   2    0.11    0.03
  11   7   2    0.05    0.03
 -11   7  -2    0.09    0.03
  11   7   2   -0.04    0.04
 -11   7  -2    0.01    0.04
  12  -7   2    2.91    0.10
 -12  -7  -2    3.01    0.11
 -12   7  -2    3.19    0.11
  12   7   2    2.98    0.11
 -12   7  -2    3.10    0.12
  12   7   2    3.05    0.10
 -13  -7  -2    1.61    0.08
  13  -7   2    1.71    0.08
  13   7   2    1.53    0.08
 -13   7  -2    1.71    0.08
 -13   7  -2    1.54    0.08
  13   7   2    1.73    0.07
  14  -7   2    0.15    0.04
 -14  -7  -2    0.14    0.04
 -14   7  -2    0.12    0.04
  14   7   2    0.12    0.04
 -14   7  -2    0.01    0.04
  14   7   2    0.00    0.04
  15  -7   2   -0.01    0.03
 -15  -7  -2    0.06    0.04
  15   7   2   -0.06    0.03
 -15   7  -2   -0.02    0.04
 -15   7  -2   -0.01    0.04
  15   7   2   -0.05    0.04
  16  -7   2    1.79    0.08
 -16  -7  -2    1.72    0.08
 -16   7  -2    1.89    0.09
  16   7   2    1.76    0.08
  16   7   2    1.80    0.09
 -16   7  -2    1.93    0.09
  17  -7   2   -0.05    0.03
 -17  -7  -2   -0.05    0.04
 -17   7  -2    0.00    0.04
  17   7   2   -0.04    0.04
 -17   7  -2    0.01    0.05
  17   7   2    0.02    0.04
 -18  -7  -2    0.01    0.04
  18  -7   2   -0.08    0.03
 -18   7  -2    0.03    0.05
  18   7   2    0.03    0.04
  18   7   2   -0.06    0.04
 -18   7  -2   -0.02    0.04
  19  -7   2    2.91    0.11
 -19  -7  -2    2.77    0.11
 -19   7  -2    2.83    0.12
  19   7   2    2.84    0.11
  19   7   2    2.62    0.11
 -19   7  -2    2.94    0.11
 -20  -7  -2    0.01    0.05
  20  -7   2    0.01    0.04
  20   7   2   -0.02    0.04
  20   7   2    0.08    0.04
 -20   7  -2    0.04    0.04
 -20   7  -2    0.01    0.05
 -21  -7  -2    5.15    0.17
  21  -7   2    4.78    0.16
 -21   7  -2    5.27    0.17
 -21   7  -2    5.12    0.18
  21   7   2    5.08    0.17
  21   7   2    5.11    0.17
  22  -7   2    0.85    0.08
 -22  -7  -2    0.86    0.08
  22   7   2    0.96    0.07
 -22   7  -2    0.95    0.08
  22   7   2    1.04    0.08
 -22   7  -2    1.13    0.08
  23  -7   2   -0.05    0.05
 -23  -7  -2   -0.04    0.05
 -23   7  -2    0.00    0.05
  23   7   2    0.05    0.05
 -23   7  -2    0.01    0.05
 -24  -7  -2    0.51    0.07
  24  -7   2    0.35    0.06
 -24   7  -2    0.44    0.06
  24   7   2    0.50    0.07
 -24   7  -2    0.48    0.07
  25  -7   2    1.26    0.08
 -25  -7  -2    1.04    0.09
 -25   7  -2    1.20    0.09
 -25   7  -2    1.18    0.09
  25   7   2    1.09    0.09
 -26  -7  -2    0.11    0.06
  26  -7   2    0.24    0.06
 -26   7  -2    0.20    0.06
 -26   7  -2    0.22    0.07
  26   7   2    0.17    0.06
 -27  -7  -2    4.04    0.16
  27  -7   2    3.91    0.15
 -27   7  -2    3.83    0.15
  27   7   2    4.20    0.16
 -27   7  -2    3.93    0.17
  28  -7   2    0.29    0.07
  28   7   2    0.26    0.06
 -28   7  -2    0.29    0.07
 -28   7  -2    0.40    0.07
 -29   7  -2    0.13    0.06
  29  -8  -2    2.97    0.13
 -29   8   2    3.26    0.15
 -28  -8   2    0.11    0.07
  28  -8  -2    0.10    0.06
  28  -8  -2   -0.06    0.06
 -28   8   2    0.10    0.06
  28   8  -2    0.04    0.06
 -27  -8   2    0.70    0.08
  27  -8  -2    0.54    0.07
  27   8  -2    0.60    0.08
 -27   8   2    0.52    0.08
 -26  -8   2    1.66    0.11
  26  -8  -2    1.58    0.10
 -26   8   2    1.66    0.10
  26   8  -2    1.66    0.10
  25  -8  -2    0.00    0.04
 -25  -8   2   -0.02    0.06
 -25   8   2    0.03    0.06
 -25   8   2    0.06    0.05
  25   8  -2    0.05    0.05
  24  -8  -2    0.33    0.06
 -24  -8   2    0.41    0.06
  24   8  -2    0.31    0.06
 -24   8   2    0.44    0.07
 -24   8   2    0.39    0.07
 -23  -8   2    0.72    0.07
  23  -8  -2    0.82    0.07
  23   8  -2    0.78    0.07
 -23   8   2    0.87    0.08
  23   8  -2    0.80    0.07
 -23   8   2    0.81    0.08
 -22  -8   2    0.04    0.05
  22  -8  -2    0.01    0.04
 -22   8   2    0.10    0.06
  22   8  -2    0.01    0.05
  22   8  -2   -0.06    0.05
 -22   8   2    0.01    0.05
 -21  -8   2    0.15    0.05
  21  -8  -2    0.12    0.04
  21   8  -2    0.07    0.05
 -21   8   2    0.13    0.05
 -21   8   2    0.03    0.05
  21   8  -2    0.11    0.05
  20  -8  -2    1.35    0.08
 -20  -8   2    1.48    0.09
 -20   8   2    1.45    0.09
 -20   8   2    1.44    0.09
  20   8  -2    1.31    0.09
  20   8  -2    1.42    0.08
 -19  -8   2    0.09    0.05
  19  -8  -2    0.13    0.04
  19   8  -2    0.05    0.05
 -19   8   2    0.10    0.05
  19   8  -2    0.17    0.05
 -19   8   2    0.05    0.05
  18  -8  -2    1.54    0.08
 -18  -8   2    1.63    0.08
 -18   8   2    1.81    0.09
 -18   8   2    1.55    0.09
  18   8  -2    1.48    0.09
  18   8  -2    1.75    0.09
  17  -8  -2    0.00    0.04
 -17  -8   2    0.04    0.04
  17   8  -2    0.03    0.04
  17   8  -2    0.02    0.04
 -17   8   2    0.05    0.04
 -17   8   2   -0.04    0.04
 -16  -8   2    2.97    0.11
  16  -8  -2    3.13    0.10
  16   8  -2    3.13    0.12
 -16   8   2    3.06    0.12
  16   8  -2    2.92    0.11
 -16   8   2    2.96    0.12
  15  -8  -2    1.57    0.07
 -15  -8   2    1.63    0.08
  15   8  -2    1.54    0.08
  15   8  -2    1.70    0.09
 -15   8   2    1.53    0.08
 -15   8   2    1.47    0.09
 -14  -8   2   17.37    0.44
  14  -8  -2   17.56    0.42
 -14   8   2   17.53    0.44
 -14   8   2   17.37    0.44
  14   8  -2   16.76    0.43
  14   8  -2   17.17    0.43
 -13  -8   2    2.08    0.08
  13  -8  -2    2.08    0.08
  13   8  -2    1.98    0.09
 -13   8   2    2.15    0.10
 -13   8   2    1.97    0.09
  13   8  -2    2.04    0.09
  12  -8  -2    5.53    0.15
 -12  -8   2    5.40    0.16
 -12   8   2    5.32    0.16
  12   8  -2    5.27    0.16
  12   8  -2    5.85    0.17
 -12   8   2    5.51    0.17
  11  -8  -2   12.44    0.31
 -11  -8   2   12.74    0.33
 -11   8   2   12.89    0.33
 -11   8   2   12.47    0.33
  11   8  -2   13.13    0.33
  11   8  -2   12.79    0.32
  10  -8  -2    0.44    0.04
 -10  -8   2    0.40    0.04
 -10   8   2    0.44    0.05
  10   8  -2    0.41    0.05
 -10   8   2    0.44    0.05
  10   8  -2    0.39    0.04
   9  -8  -2    0.05    0.03
  -9  -8   2    0.04    0.03
  -9   8   2    0.01    0.04
  -9   8   2    0.06    0.03
   9   8  -2    0.03    0.04
  -9   8   2    0.06    0.03
   9   8  -2    0.05    0.03
   8  -8  -2    1.02    0.05
  -8  -8   2    1.09    0.06
  -8   8   2    1.06    0.06
  -8   8   2    1.06    0.06
   8   8  -2    1.07    0.06
   8   8  -2    0.91    0.07
  -8   8   2    0.90    0.07
  -7  -8   2    0.26    0.03
   7  -8  -2    0.30    0.03
  -7   8   2    0.26    0.04
  -7   8   2    0.25    0.04
   7   8  -2    0.24    0.04
  -7   8   2    0.27    0.03
   7   8  -2    0.25    0.04
  -6  -8   2    6.97    0.19
   6  -8  -2    6.75    0.18
  -6   8   2    6.90    0.20
  -6   8   2    7.26    0.18
  -6   8   2    7.18    0.20
   6   8  -2    6.93    0.19
   6   8  -2    7.10    0.20
  -5  -8   2    8.90    0.23
  -5   8   2    8.44    0.23
  -5   8   2    8.92    0.23
  -5   8   2    8.92    0.24
   5   8  -2    9.27    0.22
   5   8  -2    8.85    0.23
   5   8  -2    8.79    0.23
  -5   8   2    8.83    0.22
  -4  -8   2    5.40    0.15
   4   8  -2    5.49    0.16
  -4   8   2    5.55    0.16
  -4   8   2    5.55    0.15
  -4   8   2    5.51    0.15
   4   8  -2    5.38    0.14
  -4   8   2    5.24    0.15
   4   8  -2    5.41    0.16
  -3  -8   2    7.47    0.20
  -3   8   2    7.58    0.19
  -3   8   2    7.05    0.19
   3   8  -2    7.39    0.20
  -3   8   2    7.31    0.20
   3   8  -2    7.36    0.19
  -3   8   2    7.53    0.20
   3   8  -2    7.06    0.20
  -2  -8   2    0.33    0.04
  -2   8   2    0.28    0.03
   2   8  -2    0.25    0.04
   2   8  -2    0.28    0.04
  -2   8   2    0.28    0.04
   2   8  -2    0.21    0.03
  -2   8   2    0.21    0.04
  -1  -8   2    1.89    0.07
  -1   8   2    1.94    0.07
   1   8  -2    1.83    0.07
  -1   8   2    1.67    0.07
  -1   8   2    1.88    0.08
   1   8  -2    1.99    0.08
   1   8  -2    2.01    0.08
   0  -8  -2    2.60    0.09
   0   8   2    2.62    0.09
   0   8  -2    2.63    0.09
   0   8   2    2.63    0.09
   0   8  -2    2.50    0.09
   0   8  -2    2.63    0.09
   0   8  -2    2.59    0.09
  -1  -8  -2   10.06    0.25
  -1  -8  -2    9.99    0.26
   1   8   2   10.07    0.26
  -1   8  -2   10.21    0.26
  -1   8  -2    9.99    0.26
  -1   8  -2   10.15    0.26
   1   8   2   10.02    0.25
  -1   8  -2   10.02    0.26
  -2  -8  -2    6.60    0.17
  -2  -8  -2    6.34    0.18
  -2   8  -2    6.59    0.18
   2   8   2    6.50    0.18
  -2   8  -2    6.51    0.18
  -2   8  -2    6.41    0.18
  -2   8  -2    6.48    0.18
   2   8   2    6.40    0.17
  -3  -8  -2   36.56    0.85
  -3  -8  -2   36.57    0.88
   3   8   2   34.84    0.86
  -3   8  -2   36.91    0.88
  -3   8  -2   36.53    0.85
   3   8   2   37.19    0.85
  -3   8  -2   36.54    0.86
  -3   8  -2   37.15    0.85
  -4  -8  -2   26.41    0.61
  -4  -8  -2   26.10    0.63
  -4   8  -2   25.33    0.61
  -4   8  -2   24.86    0.62
   4   8   2   26.30    0.62
  -4   8  -2   25.75    0.63
   4   8   2   26.02    0.61
  -4   8  -2   26.64    0.61
  -5  -8  -2    1.93    0.08
   5   8   2    1.97    0.08
   5   8   2    2.05    0.08
  -5   8  -2    1.93    0.08
  -5   8  -2    1.95    0.08
   6  -8   2    0.69    0.05
  -6  -8  -2    0.65    0.05
   6  -8   2    0.60    0.04
   6   8   2    0.55    0.05
   6   8   2    0.69    0.05
  -6   8  -2    0.61    0.05
  -6   8  -2    0.54    0.05
   7  -8   2    1.52    0.06
  -7  -8  -2    1.60    0.07
   7  -8   2    1.56    0.07
   7   8   2    1.65    0.07
  -7   8  -2    1.60    0.08
   7   8   2    1.62    0.07
  -7   8  -2    1.60    0.07
   8  -8   2    3.03    0.09
  -8  -8  -2    3.01    0.11
   8  -8   2    3.05    0.10
  -8   8  -2    3.10    0.11
  -8   8  -2    3.04    0.10
   8   8   2    3.10    0.10
   8   8   2    2.93    0.11
   9  -8   2    5.89    0.16
  -9  -8  -2    5.68    0.17
  -9   8  -2    5.81    0.17
   9   8   2    6.00    0.17
  -9   8  -2    5.98    0.17
   9   8   2    5.74    0.16
 -10  -8  -2    0.10    0.03
  10  -8   2    0.05    0.03
 -10   8  -2    0.08    0.04
  10   8   2    0.06    0.03
  10   8   2    0.01    0.04
 -10   8  -2    0.05    0.03
 -11  -8  -2    0.01    0.04
  11  -8   2    0.03    0.03
 -11   8  -2   -0.01    0.04
 -11   8  -2    0.05    0.03
  11   8   2   -0.01    0.03
  11   8   2    0.04    0.03
 -12  -8  -2    1.39    0.08
  12  -8   2    1.42    0.07
  12   8   2    1.30    0.07
 -12   8  -2    1.44    0.07
 -12   8  -2    1.35    0.08
  12   8   2    1.21    0.08
  13  -8   2    4.46    0.14
 -13  -8  -2    4.67    0.15
  13   8   2    4.35    0.14
 -13   8  -2    4.64    0.14
  13   8   2    4.19    0.14
 -13   8  -2    4.26    0.15
  14  -8   2    0.13    0.04
 -14  -8  -2    0.16    0.04
 -14   8  -2    0.11    0.04
  14   8   2    0.08    0.05
 -14   8  -2    0.12    0.04
  14   8   2    0.17    0.04
 -15  -8  -2    0.03    0.04
  15  -8   2    0.01    0.04
  15   8   2    0.00    0.04
 -15   8  -2    0.02    0.04
  15   8   2    0.01    0.04
 -15   8  -2   -0.02    0.04
  16  -8   2    4.85    0.15
 -16  -8  -2    4.60    0.15
 -16   8  -2    4.96    0.16
  16   8   2    4.84    0.15
 -16   8  -2    4.56    0.16
  16   8   2    4.44    0.15
  17  -8   2    0.73    0.06
 -17  -8  -2    0.74    0.07
  17   8   2    0.71    0.06
 -17   8  -2    0.65    0.07
  17   8   2    0.57    0.06
 -17   8  -2    0.82    0.07
 -18  -8  -2    0.13    0.05
  18  -8   2    0.16    0.05
 -18   8  -2    0.05    0.05
  18   8   2    0.09    0.05
  18   8   2    0.11    0.04
 -18   8  -2    0.14    0.05
  19  -8   2   11.85    0.31
 -19  -8  -2   11.65    0.32
 -19   8  -2   11.74    0.32
  19   8   2   11.60    0.31
  19   8   2   11.57    0.31
 -19   8  -2   11.39    0.32
  20  -8   2    0.89    0.08
 -20  -8  -2    0.82    0.08
 -20   8  -2    0.77    0.08
  20   8   2    0.96    0.08
 -20   8  -2    1.02    0.08
  20   8   2    1.00    0.08
 -21  -8  -2    3.98    0.15
  21  -8   2    4.05    0.14
 -21   8  -2    4.18    0.16
  21   8   2    4.24    0.15
 -21   8  -2    4.32    0.15
  21   8   2    4.24    0.15
 -22  -8  -2    0.35    0.07
  22  -8   2    0.34    0.06
 -22   8  -2    0.42    0.06
  22   8   2    0.29    0.06
  22   8   2    0.33    0.06
 -22   8  -2    0.40    0.07
  23  -8   2    0.26    0.06
 -23  -8  -2    0.34    0.06
  23   8   2    0.29    0.06
  23   8   2    0.39    0.06
 -23   8  -2    0.33    0.07
 -23   8  -2    0.35    0.06
  24  -8   2    0.23    0.06
 -24  -8  -2    0.09    0.06
 -24   8  -2    0.06    0.06
 -24   8  -2    0.10    0.05
  24   8   2    0.20    0.05
 -25  -8  -2    2.92    0.14
  25  -8   2    2.87    0.12
  25   8   2    2.73    0.13
 -25   8  -2    2.94    0.14
 -25   8  -2    2.80    0.13
  26  -8   2    0.12    0.06
 -26  -8  -2    0.22    0.07
 -26   8  -2    0.17    0.07
 -26   8  -2    0.24    0.06
  26   8   2    0.14    0.06
  27  -8   2    0.48    0.07
  27   8   2    0.53    0.08
 -27   8  -2    0.55    0.09
  28  -9  -2    2.84    0.13
 -28   9   2    2.77    0.14
  27  -9  -2    0.26    0.07
 -27  -9   2    0.35    0.07
  27  -9  -2    0.26    0.06
  27   9  -2    0.24    0.06
 -27   9   2    0.20    0.07
 -26  -9   2    0.32    0.07
  26  -9  -2    0.34    0.06
 -26   9   2    0.42    0.07
  26   9  -2    0.40    0.07
 -25  -9   2    1.35    0.09
 -25  -9   2    1.10    0.10
  25  -9  -2    1.32    0.09
 -25   9   2    1.27    0.10
  25   9  -2    1.28    0.10
  24  -9  -2    0.82    0.07
 -24  -9   2    0.77    0.08
 -24   9   2    0.95    0.09
 -24   9   2    0.74    0.09
  24   9  -2    0.73    0.07
  23  -9  -2    0.34    0.06
 -23  -9   2    0.45    0.07
  23   9  -2    0.41    0.06
 -23   9   2    0.37    0.07
 -23   9   2    0.50    0.07
 -22  -9   2    1.16    0.09
  22  -9  -2    1.18    0.08
  22   9  -2    0.97    0.08
 -22   9   2    0.96    0.09
  22   9  -2    1.05    0.09
 -22   9   2    1.13    0.09
 -21  -9   2    0.50    0.07
  21  -9  -2    0.57    0.06
 -21   9   2    0.50    0.07
 -21   9   2    0.65    0.07
  21   9  -2    0.55    0.07
  21   9  -2    0.66    0.07
  20  -9  -2    3.16    0.12
 -20  -9   2    3.11    0.12
  20   9  -2    3.26    0.13
 -20   9   2    3.17    0.13
  20   9  -2    3.02    0.12
 -20   9   2    3.26    0.13
 -19  -9   2    1.79    0.10
  19  -9  -2    1.79    0.09
 -19   9   2    1.95    0.10
  19   9  -2    1.96    0.10
  19   9  -2    1.68    0.09
 -19   9   2    1.82    0.10
  18  -9  -2    1.81    0.08
 -18  -9   2    1.77    0.10
 -18   9   2    1.91    0.10
  18   9  -2    1.85    0.10
 -18   9   2    1.89    0.11
  18   9  -2    1.79    0.10
 -17  -9   2    0.97    0.07
  17  -9  -2    0.89    0.07
  17   9  -2    0.93    0.07
 -17   9   2    0.95    0.08
 -17   9   2    1.03    0.08
  17   9  -2    0.98    0.08
  16  -9  -2    1.30    0.07
 -16  -9   2    1.34    0.08
 -16   9   2    1.11    0.08
  16   9  -2    1.39    0.08
  16   9  -2    1.15    0.08
 -16   9   2    1.27    0.08
  15  -9  -2    1.05    0.07
 -15  -9   2    1.07    0.07
  15   9  -2    0.98    0.07
 -15   9   2    1.02    0.08
 -15   9   2    1.02    0.08
  15   9  -2    1.10    0.08
  14  -9  -2    6.71    0.18
 -14  -9   2    6.57    0.19
 -14   9   2    6.16    0.20
  14   9  -2    6.43    0.19
 -14   9   2    6.28    0.19
  14   9  -2    6.13    0.19
  13  -9  -2    2.76    0.10
 -13  -9   2    2.64    0.10
 -13   9   2    2.87    0.11
  13   9  -2    2.76    0.11
 -13   9   2    2.88    0.11
  13   9  -2    2.72    0.11
 -12  -9   2    0.73    0.06
  12  -9  -2    0.82    0.06
 -12   9   2    0.72    0.07
  12   9  -2    0.72    0.06
  12   9  -2    0.75    0.07
 -12   9   2    0.71    0.07
 -11  -9   2    0.78    0.06
  11  -9  -2    0.81    0.06
  11   9  -2    0.70    0.06
 -11   9   2    0.64    0.06
 -11   9   2    0.77    0.06
  11   9  -2    0.82    0.07
 -10  -9   2    0.38    0.04
  10  -9  -2    0.36    0.04
  10   9  -2    0.36    0.05
 -10   9   2    0.33    0.05
  10   9  -2    0.33    0.05
 -10   9   2    0.25    0.05
  -9  -9   2    0.36    0.04
   9  -9  -2    0.43    0.04
  -9   9   2    0.43    0.05
  -9   9   2    0.42    0.05
   9   9  -2    0.34    0.05
   9   9  -2    0.47    0.05
   8  -9  -2    2.43    0.08
  -8  -9   2    2.56    0.09
  -8   9   2    2.65    0.09
  -8   9   2    2.23    0.09
   8   9  -2    2.46    0.10
   8   9  -2    2.53    0.10
  -8   9   2    2.40    0.10
   7  -9  -2    0.16    0.03
  -7  -9   2    0.14    0.04
  -7   9   2    0.11    0.04
  -7   9   2    0.12    0.04
  -7   9   2    0.11    0.03
   7   9  -2    0.05    0.04
   7   9  -2    0.09    0.03
   6  -9  -2    1.20    0.06
  -6  -9   2    1.23    0.06
  -6   9   2    1.05    0.06
  -6   9   2    1.20    0.07
   6   9  -2    1.16    0.07
  -6   9   2    1.15    0.07
   6   9  -2    1.02    0.07
  -5  -9   2    2.10    0.08
  -5   9   2    2.11    0.08
  -5   9   2    2.05    0.09
   5   9  -2    2.21    0.09
  -5   9   2    2.20    0.09
  -5   9   2    2.04    0.09
   5   9  -2    2.11    0.09
  -4  -9   2    3.30    0.11
   4   9  -2    3.47    0.11
  -4   9   2    3.31    0.11
  -4   9   2    3.16    0.11
  -4   9   2    3.26    0.11
  -4   9   2    3.36    0.11
   4   9  -2    3.24    0.10
   4   9  -2    3.24    0.11
  -3  -9   2    0.17    0.03
  -3   9   2    0.10    0.03
  -3   9   2    0.19    0.04
   3   9  -2    0.21    0.04
  -3   9   2    0.17    0.04
   3   9  -2    0.17    0.03
   3   9  -2    0.18    0.04
  -2  -9   2    0.06    0.03
   2   9  -2    0.01    0.03
  -2   9   2    0.01    0.03
  -2   9   2   -0.05    0.03
   2   9  -2   -0.02    0.03
   2   9  -2   -0.01    0.03
  -2   9   2    0.04    0.04
  -1  -9   2    0.21    0.03
   1  -9  -2    0.11    0.03
  -1   9   2    0.11    0.04
  -1   9   2    0.15    0.03
   1   9  -2    0.12    0.04
   1   9  -2    0.15    0.04
   1   9  -2    0.16    0.04
  -1   9   2    0.17    0.04
   0  -9  -2    0.00    0.03
   0   9  -2   -0.07    0.03
   0   9  -2    0.01    0.04
   0   9   2    0.01    0.04
   0   9  -2    0.07    0.04
   0   9   2    0.05    0.03
  -1  -9  -2    0.09    0.03
  -1  -9  -2    0.09    0.03
  -1   9  -2    0.10    0.04
   1   9   2    0.08    0.04
  -1   9  -2    0.12    0.04
  -1   9  -2    0.04    0.04
  -1   9  -2    0.10    0.03
   1   9   2    0.14    0.03
  -2  -9  -2    0.39    0.04
  -2  -9  -2    0.21    0.04
  -2   9  -2    0.39    0.04
   2   9   2    0.38    0.04
   2   9   2    0.42    0.05
  -2   9  -2    0.37    0.04
  -2   9  -2    0.39    0.04
  -2   9  -2    0.37    0.04
  -3  -9  -2    6.03    0.16
  -3  -9  -2    6.12    0.18
   3   9   2    6.22    0.17
  -3   9  -2    6.20    0.17
  -3   9  -2    5.95    0.17
  -3   9  -2    5.84    0.17
  -3   9  -2    6.29    0.17
   3   9   2    5.89    0.17
  -4  -9  -2    0.13    0.04
   4   9   2    0.18    0.04
  -4   9  -2    0.12    0.04
  -4   9  -2    0.18    0.04
  -4   9  -2    0.08    0.04
   4   9   2    0.10    0.04
  -5  -9  -2    0.06    0.04
  -5   9  -2    0.06    0.03
   5   9   2    0.07    0.03
  -5   9  -2    0.07    0.04
   5   9   2    0.04    0.04
   6  -9   2    1.04    0.06
  -6  -9  -2    1.02    0.06
   6  -9   2    0.76    0.06
   6   9   2    0.92    0.07
   6   9   2    0.99    0.07
  -6   9  -2    0.93    0.07
  -6   9  -2    1.16    0.07
  -7  -9  -2    5.40    0.16
   7  -9   2    5.45    0.15
   7  -9   2    5.65    0.16
  -7   9  -2    5.67    0.16
  -7   9  -2    5.51    0.17
   7   9   2    5.76    0.16
   7   9   2    5.33    0.16
  -8  -9  -2    0.00    0.04
   8  -9   2    0.03    0.03
  -8   9  -2   -0.06    0.04
   8   9   2   -0.05    0.04
   8   9   2    0.01    0.03
  -8   9  -2    0.06    0.03
   9  -9   2    2.52    0.09
  -9  -9  -2    2.46    0.10
   9   9   2    2.29    0.10
   9   9   2    2.46    0.10
  -9   9  -2    2.41    0.10
  -9   9  -2    2.32    0.10
 -10  -9  -2    0.38    0.05
  10  -9   2    0.35    0.04
 -10   9  -2    0.35    0.05
  10   9   2    0.40    0.05
 -10   9  -2    0.38    0.05
  10   9   2    0.39    0.05
  11  -9   2    2.20    0.09
 -11  -9  -2    2.20    0.09
 -11   9  -2    2.38    0.10
  11   9   2    2.13    0.10
  11   9   2    2.35    0.09
 -11   9  -2    2.10    0.10
 -12  -9  -2    4.06    0.14
  12  -9   2    4.30    0.13
 -12   9  -2    4.49    0.15
 -12   9  -2    4.41    0.14
  12   9   2    4.10    0.14
  12   9   2    4.20    0.14
  13  -9   2    3.74    0.12
 -13  -9  -2    3.79    0.13
 -13   9  -2    3.83    0.13
  13   9   2    3.90    0.13
 -13   9  -2    3.61    0.14
  13   9   2    3.57    0.13
 -14  -9  -2    0.04    0.05
  14  -9   2    0.10    0.04
 -14   9  -2    0.14    0.04
 -14   9  -2    0.10    0.05
  14   9   2    0.02    0.05
  14   9   2    0.04    0.04
  15  -9   2    4.60    0.14
 -15  -9  -2    4.45    0.15
 -15   9  -2    4.67    0.15
 -15   9  -2    4.65    0.16
  15   9   2    4.62    0.15
  15   9   2    4.48    0.15
  16  -9   2    0.15    0.04
 -16  -9  -2    0.08    0.05
  16   9   2    0.14    0.05
 -16   9  -2    0.10    0.05
 -16   9  -2    0.09    0.05
  16   9   2    0.12    0.05
 -17  -9  -2    4.52    0.15
  17  -9   2    4.30    0.14
 -17   9  -2    4.41    0.15
  17   9   2    4.15    0.15
 -17   9  -2    3.99    0.15
  17   9   2    4.14    0.15
  18  -9   2    5.15    0.16
 -18  -9  -2    5.32    0.18
  18   9   2    5.14    0.17
 -18   9  -2    5.51    0.17
  18   9   2    5.22    0.17
 -18   9  -2    5.04    0.18
 -19  -9  -2    4.91    0.17
  19  -9   2    4.85    0.16
 -19   9  -2    4.81    0.18
 -19   9  -2    4.98    0.17
  19   9   2    4.90    0.17
  19   9   2    4.79    0.16
 -20  -9  -2    0.13    0.06
  20  -9   2    0.19    0.05
  20   9   2    0.16    0.06
  20   9   2    0.17    0.05
 -20   9  -2    0.21    0.05
 -20   9  -2    0.22    0.06
  21  -9   2    0.37    0.06
 -21  -9  -2    0.29    0.06
  21   9   2    0.37    0.06
  21   9   2    0.40    0.06
 -21   9  -2    0.43    0.06
 -21   9  -2    0.37    0.07
 -22  -9  -2   -0.05    0.06
  22  -9   2   -0.04    0.05
  22   9   2    0.04    0.06
 -22   9  -2    0.08    0.06
 -22   9  -2    0.08    0.05
  22   9   2    0.04    0.05
 -23  -9  -2    7.17    0.23
  23  -9   2    7.60    0.22
 -23   9  -2    7.33    0.24
  23   9   2    7.50    0.23
  23   9   2    7.56    0.23
  24  -9   2    0.04    0.06
 -24  -9  -2    0.05    0.06
  24   9   2    0.16    0.06
 -24   9  -2    0.05    0.07
 -25  -9  -2    1.29    0.10
  25  -9   2    1.16    0.09
 -25   9  -2    1.35    0.10
  25   9   2    1.17    0.09
  26  -9   2    0.01    0.06
  26   9   2    0.03    0.06
 -27  10   2    1.47    0.11
 -26 -10   2    0.13    0.06
  26 -10  -2    0.15    0.06
 -26 -10   2    0.16    0.06
  26  10  -2    0.14    0.06
 -26  10   2    0.13    0.06
 -25 -10   2    0.01    0.06
 -25 -10   2   -0.01    0.06
  25 -10  -2    0.08    0.06
  25  10  -2    0.06    0.05
 -25  10   2    0.05    0.06
 -24 -10   2    1.79    0.11
  24 -10  -2    1.91    0.10
 -24  10   2    1.87    0.11
  24  10  -2    1.75    0.10
  23 -10  -2    3.73    0.14
 -23 -10   2    3.64    0.14
 -23  10   2    3.90    0.15
  23  10  -2    3.79    0.15
  22 -10  -2    3.63    0.13
 -22 -10   2    3.86    0.15
 -22  10   2    3.85    0.16
  22  10  -2    3.65    0.15
  22  10  -2    3.61    0.15
 -22  10   2    3.81    0.15
  21 -10  -2    6.86    0.20
 -21 -10   2    7.02    0.22
 -21  10   2    6.89    0.22
  21  10  -2    6.45    0.21
  21  10  -2    6.96    0.22
 -21  10   2    6.93    0.23
 -20 -10   2    0.92    0.08
  20 -10  -2    0.89    0.07
  20  10  -2    0.75    0.07
 -20  10   2    0.82    0.09
 -20  10   2    0.74    0.07
  20  10  -2    0.74    0.07
  19 -10  -2    0.11    0.05
 -19 -10   2    0.07    0.05
  19  10  -2    0.00    0.06
 -19  10   2    0.11    0.05
  19  10  -2    0.09    0.05
 -19  10   2    0.03    0.06
 -18 -10   2    9.38    0.27
  18 -10  -2    9.71    0.26
  18  10  -2    9.56    0.28
 -18  10   2    9.74    0.28
 -18  10   2    9.71    0.28
  18  10  -2    9.65    0.27
  17 -10  -2    1.00    0.07
 -17 -10   2    0.84    0.07
 -17  10   2    0.75    0.08
 -17  10   2    0.98    0.07
  17  10  -2    0.87    0.08
  17  10  -2    0.79    0.07
  16 -10  -2    2.25    0.09
 -16 -10   2    2.18    0.10
 -16  10   2    2.21    0.11
 -16  10   2    2.12    0.11
  16  10  -2    2.14    0.10
  16  10  -2    2.39    0.11
 -15 -10   2    3.60    0.13
  15 -10  -2    3.57    0.12
 -15  10   2    3.47    0.14
  15  10  -2    3.63    0.14
 -15  10   2    3.90    0.14
  15  10  -2    3.60    0.13
 -14 -10   2    0.43    0.06
  14 -10  -2    0.45    0.05
 -14  10   2    0.48    0.06
  14  10  -2    0.50    0.06
 -14  10   2    0.39    0.06
  14  10  -2    0.42    0.06
  13 -10  -2    2.57    0.09
 -13 -10   2    2.54    0.10
 -13  10   2    2.57    0.10
 -13  10   2    2.28    0.11
  13  10  -2    2.30    0.11
  13  10  -2    2.36    0.11
  12 -10  -2    0.24    0.04
 -12 -10   2    0.22    0.04
 -12  10   2    0.21    0.05
  12  10  -2    0.19    0.05
 -12  10   2    0.28    0.05
  12  10  -2    0.27    0.05
 -11 -10   2    4.62    0.14
  11 -10  -2    4.46    0.13
 -11  10   2    4.46    0.15
 -11  10   2    4.26    0.15
  11  10  -2    4.48    0.15
  11  10  -2    4.50    0.15
 -10 -10   2    2.37    0.09
  10 -10  -2    2.41    0.09
 -10  10   2    2.52    0.11
 -10  10   2    2.63    0.11
  10  10  -2    2.44    0.11
  10  10  -2    2.51    0.10
   9 -10  -2    0.20    0.04
  -9 -10   2    0.24    0.04
  -9  10   2    0.17    0.05
   9  10  -2    0.24    0.05
   9  10  -2    0.18    0.05
  -9  10   2    0.23    0.05
  -8 -10   2    2.81    0.10
   8 -10  -2    2.89    0.10
  -8  10   2    2.87    0.11
   8  10  -2    2.75    0.11
  -8  10   2    3.02    0.11
  -8  10   2    2.98    0.10
   8  10  -2    2.94    0.12
  -7 -10   2    8.26    0.23
   7 -10  -2    7.98    0.21
  -7  10   2    8.47    0.22
   7  10  -2    8.27    0.23
   7  10  -2    8.29    0.23
  -7  10   2    8.06    0.23
  -7  10   2    8.04    0.23
   6 -10  -2    0.51    0.04
  -6 -10   2    0.46    0.05
   6  10  -2    0.49    0.06
  -6  10   2    0.47    0.05
   6  10  -2    0.46    0.05
  -6  10   2    0.45    0.05
  -6  10   2    0.51    0.05
  -5 -10   2    1.15    0.07
   5  10  -2    1.01    0.07
  -5  10   2    1.04    0.06
   5  10  -2    0.98    0.07
  -5  10   2    1.08    0.07
  -5  10   2    0.95    0.07
  -4 -10   2    2.56    0.10
  -4  10   2    2.53    0.10
   4  10  -2    2.61    0.11
  -4  10   2    2.60    0.10
   4  10  -2    2.50    0.10
  -4  10   2    2.48    0.10
   3 -10  -2   -0.04    0.04
  -3 -10   2   -0.01    0.04
  -3  10   2   -0.02    0.04
  -3  10   2    0.05    0.03
  -3  10   2    0.10    0.04
   3  10  -2    0.10    0.04
   3  10  -2    0.07    0.04
   2 -10  -2   19.63    0.47
  -2 -10   2   19.55    0.48
  -2  10   2   19.05    0.48
   2  10  -2   19.13    0.47
  -2  10   2   18.84    0.47
  -2  10   2   19.28    0.46
   2  10  -2   18.82    0.47
   2  10  -2   18.97    0.47
   1 -10  -2    2.05    0.08
  -1 -10   2    2.00    0.09
   1  10  -2    2.00    0.09
   1  10  -2    1.92    0.09
  -1  10   2    2.08    0.09
  -1  10   2    2.10    0.08
   1  10  -2    2.09    0.08
   0 -10  -2    2.88    0.10
   0 -10   2    2.92    0.10
   0 -10  -2    2.87    0.11
   0  10  -2    2.89    0.11
   0  10   2    2.81    0.11
   0  10  -2    2.92    0.10
   0  10  -2    2.85    0.11
   0  10   2    3.10    0.11
  -1 -10  -2    0.85    0.06
  -1 -10  -2    0.85    0.06
  -1  10  -2    0.86    0.06
  -1  10  -2    0.73    0.07
  -1  10  -2    0.87    0.06
   1  10   2    0.85    0.07
   1  10   2    0.92    0.06
  -2 -10  -2    4.27    0.14
   2  10   2    4.37    0.13
  -2  10  -2    4.47    0.14
   2  10   2    4.18    0.14
  -2  10  -2    4.46    0.14
  -2  10  -2    4.31    0.14
  -2  10  -2    4.32    0.14
  -3 -10  -2    3.59    0.13
  -3  10  -2    3.90    0.13
   3  10   2    3.59    0.12
   3  10   2    3.50    0.12
  -3  10  -2    3.74    0.12
  -3  10  -2    3.60    0.12
  -3  10  -2    3.76    0.12
  -4 -10  -2   11.09    0.30
   4  10   2   11.39    0.28
   4  10   2   10.54    0.29
  -4  10  -2   11.04    0.29
  -4  10  -2   10.83    0.28
  -4  10  -2   10.97    0.29
   5 -10   2    9.79    0.25
  -5 -10  -2    9.98    0.27
  -5  10  -2    9.65    0.27
  -5  10  -2   10.28    0.27
   5  10   2    9.74    0.27
   5  10   2   10.04    0.26
  -6 -10  -2    1.23    0.07
   6 -10   2    1.35    0.07
   6 -10   2    1.38    0.06
   6  10   2    1.31    0.07
  -6  10  -2    1.39    0.08
  -6  10  -2    1.35    0.08
   6  10   2    1.35    0.08
  -7 -10  -2   13.17    0.34
   7 -10   2   12.73    0.32
  -7  10  -2   12.77    0.34
   7  10   2   12.39    0.34
   7  10   2   13.39    0.33
  -7  10  -2   13.12    0.34
  -8 -10  -2    0.25    0.05
   8 -10   2    0.33    0.04
   8  10   2    0.26    0.04
   8  10   2    0.27    0.05
  -8  10  -2    0.25    0.05
  -8  10  -2    0.30    0.05
  -9 -10  -2    0.79    0.07
   9 -10   2    0.76    0.06
   9  10   2    0.84    0.07
   9  10   2    0.68    0.06
  -9  10  -2    0.82    0.06
  -9  10  -2    0.66    0.07
 -10 -10  -2    0.32    0.05
  10 -10   2    0.26    0.04
 -10  10  -2    0.29    0.05
  10  10   2    0.31    0.05
  10  10   2    0.25    0.05
 -10  10  -2    0.27    0.05
  11 -10   2    3.24    0.11
 -11 -10  -2    3.21    0.12
 -11  10  -2    3.08    0.13
 -11  10  -2    3.19    0.12
  11  10   2    3.24    0.13
  11  10   2    3.37    0.12
  12 -10   2   -0.02    0.04
 -12 -10  -2    0.00    0.04
  12  10   2    0.03    0.05
  12  10   2    0.03    0.04
 -12  10  -2    0.00    0.04
 -12  10  -2   -0.01    0.04
  13 -10   2    4.85    0.15
 -13 -10  -2    4.72    0.16
  13  10   2    4.99    0.16
 -13  10  -2    5.17    0.16
  13  10   2    4.82    0.16
 -13  10  -2    4.96    0.17
 -14 -10  -2    4.99    0.17
  14 -10   2    5.22    0.16
 -14  10  -2    5.16    0.18
  14  10   2    5.13    0.17
 -14  10  -2    5.63    0.17
  14  10   2    5.31    0.17
 -15 -10  -2    0.93    0.07
  15 -10   2    0.97    0.07
  15  10   2    0.91    0.08
 -15  10  -2    1.04    0.08
  15  10   2    0.98    0.08
 -15  10  -2    0.98    0.09
 -16 -10  -2    0.15    0.05
  16 -10   2    0.20    0.05
  16  10   2    0.14    0.05
 -16  10  -2    0.12    0.06
  16  10   2    0.06    0.06
 -16  10  -2    0.17    0.05
  17 -10   2    0.01    0.04
 -17 -10  -2   -0.02    0.05
  17  10   2    0.06    0.05
  17  10   2   -0.01    0.05
 -17  10  -2   -0.09    0.05
 -17  10  -2    0.04    0.05
 -18 -10  -2    0.19    0.06
  18 -10   2    0.18    0.05
  18  10   2    0.16    0.06
 -18  10  -2    0.11    0.06
  18  10   2    0.26    0.06
 -19 -10  -2    3.71    0.15
  19 -10   2    3.72    0.14
  19  10   2    3.78    0.14
  19  10   2    3.83    0.15
 -19  10  -2    3.99    0.16
 -20 -10  -2    5.32    0.18
  20 -10   2    5.12    0.17
 -20  10  -2    5.58    0.19
  20  10   2    5.22    0.18
  20  10   2    5.34    0.18
 -21 -10  -2    0.43    0.07
  21 -10   2    0.49    0.07
  21  10   2    0.32    0.07
 -21  10  -2    0.49    0.08
  21  10   2    0.47    0.07
  22 -10   2   -0.06    0.05
 -22 -10  -2   -0.03    0.06
  22  10   2    0.06    0.06
  22  10   2    0.04    0.06
 -22  10  -2    0.06    0.06
  23 -10   2   -0.06    0.05
 -23 -10  -2   -0.01    0.06
  23  10   2    0.07    0.06
  23  10   2    0.05    0.06
 -23  10  -2    0.00    0.06
 -24 -10  -2   -0.01    0.06
  24 -10   2    0.00    0.05
  24  10   2    0.05    0.06
  24  10   2    0.07    0.06
  25 -10   2    2.56    0.12
  25  10   2    2.60    0.13
 -25 -11   2    0.01    0.06
 -25  11   2    0.00    0.06
 -24 -11   2    1.86    0.11
 -24 -11   2    1.82    0.11
 -24  11   2    1.84    0.11
  24  11  -2    1.74    0.11
 -23 -11   2   -0.06    0.06
 -23  11   2    0.09    0.06
  23  11  -2    0.06    0.06
 -22 -11   2    0.33    0.07
  22  11  -2    0.54    0.07
 -22  11   2    0.55    0.08
 -21 -11   2    1.45    0.10
  21  11  -2    1.50    0.09
 -21  11   2    1.66    0.10
  21  11  -2    1.37    0.10
 -20 -11   2   -0.08    0.06
  20  11  -2   -0.04    0.05
  20  11  -2   -0.05    0.06
 -20  11   2   -0.04    0.05
 -19 -11   2   -0.01    0.05
  19  11  -2   -0.02    0.05
 -19  11   2    0.05    0.06
  19  11  -2    0.03    0.06
 -19  11   2    0.03    0.05
 -18 -11   2    1.92    0.10
 -18  11   2    2.17    0.11
  18  11  -2    2.01    0.11
 -18  11   2    1.94    0.11
  18  11  -2    1.83    0.11
  17 -11  -2    2.60    0.10
 -17 -11   2    2.55    0.11
  17  11  -2    2.75    0.12
  17  11  -2    2.27    0.12
 -17  11   2    2.48    0.12
 -17  11   2    2.54    0.13
  16 -11  -2    4.46    0.14
 -16 -11   2    4.36    0.15
 -16  11   2    4.55    0.16
  16  11  -2    4.31    0.16
 -16  11   2    4.64    0.16
  16  11  -2    4.48    0.16
 -15 -11   2    1.29    0.09
  15 -11  -2    1.25    0.08
 -15  11   2    1.52    0.10
  15  11  -2    1.28    0.09
 -15  11   2    1.47    0.09
  15  11  -2    1.21    0.09
 -14 -11   2    0.36    0.06
  14 -11  -2    0.31    0.05
  14  11  -2    0.40    0.06
 -14  11   2    0.39    0.06
  14  11  -2    0.31    0.06
 -14  11   2    0.35    0.07
  13 -11  -2    0.14    0.04
 -13 -11   2    0.17    0.05
 -13  11   2    0.17    0.06
  13  11  -2    0.13    0.06
 -13  11   2    0.21    0.05
  13  11  -2    0.14    0.05
 -12 -11   2    0.24    0.05
  12 -11  -2    0.26    0.04
 -12  11   2    0.18    0.05
  12  11  -2    0.22    0.05
 -12  11   2    0.18    0.05
  12  11  -2    0.23    0.05
  11 -11  -2    0.24    0.04
 -11 -11   2    0.05    0.04
 -11  11   2    0.05    0.05
  11  11  -2    0.18    0.05
 -11  11   2    0.09    0.05
  11  11  -2    0.08    0.05
 -10 -11   2    5.10    0.16
  10 -11  -2    4.83    0.15
 -10  11   2    5.09    0.17
 -10  11   2    4.98    0.17
  10  11  -2    4.96    0.17
  10  11  -2    5.00    0.16
  -9 -11   2    0.01    0.04
   9 -11  -2    0.01    0.03
   9  11  -2   -0.02    0.04
  -9  11   2    0.00    0.04
  -9  11   2   -0.08    0.04
   9  11  -2   -0.05    0.04
  -8 -11   2    0.55    0.05
   8 -11  -2    0.50    0.05
  -8  11   2    0.46    0.06
  -8  11   2    0.53    0.06
   8  11  -2    0.46    0.06
   8  11  -2    0.42    0.06
   7 -11  -2    1.25    0.07
  -7 -11   2    1.12    0.07
  -7  11   2    1.14    0.08
  -7  11   2    0.83    0.07
   7  11  -2    1.04    0.08
   7  11  -2    1.13    0.07
  -6 -11   2    1.51    0.08
   6 -11  -2    1.44    0.07
  -6  11   2    1.55    0.08
  -6  11   2    1.50    0.09
   6  11  -2    1.27    0.09
   6  11  -2    1.35    0.08
  -5 -11   2    1.25    0.07
  -5  11   2    1.34    0.08
  -5  11   2    1.35    0.08
   5  11  -2    1.19    0.08
   5  11  -2    1.46    0.08
  -4 -11   2    0.03    0.04
   4 -11  -2    0.04    0.04
  -4  11   2    0.08    0.04
  -4  11   2    0.03    0.04
  -4  11   2    0.05    0.04
   4  11  -2    0.08    0.04
   4  11  -2    0.04    0.05
   3 -11  -2    0.18    0.05
  -3 -11   2    0.32    0.05
  -3  11   2    0.28    0.05
   3  11  -2    0.32    0.05
   3  11  -2    0.30    0.05
  -3  11   2    0.32    0.05
  -3  11   2    0.26    0.05
   2 -11  -2    1.50    0.08
  -2 -11   2    1.58    0.08
  -2  11   2    1.54    0.09
  -2  11   2    1.77    0.08
   2  11  -2    1.70    0.09
   2  11  -2    1.56    0.08
  -1 -11   2    2.06    0.09
   1 -11  -2    1.82    0.09
   1 -11  -2    1.80    0.09
   1  11  -2    1.80    0.09
   1  11  -2    1.94    0.09
  -1  11   2    1.92    0.09
  -1  11   2    1.95    0.09
   0 -11   2    1.31    0.08
   0 -11  -2    1.28    0.08
   0  11  -2    1.29    0.07
   0  11  -2    1.36    0.08
   0  11  -2    1.20    0.08
   0  11   2    1.31    0.08
   0  11   2    1.46    0.08
   1 -11   2    0.17    0.04
  -1 -11  -2    0.19    0.05
  -1  11  -2    0.20    0.04
   1  11   2    0.13    0.05
  -1  11  -2    0.19    0.04
  -1  11  -2    0.09    0.04
   1  11   2    0.11    0.04
  -2 -11  -2    0.50    0.05
  -2  11  -2    0.44    0.05
  -2  11  -2    0.49    0.05
  -2  11  -2    0.36    0.05
   2  11   2    0.56    0.05
   2  11   2    0.52    0.05
  -3 -11  -2    0.17    0.05
  -3  11  -2    0.14    0.04
  -3  11  -2    0.15    0.04
   3  11   2    0.13    0.04
  -3  11  -2    0.17    0.05
   3  11   2    0.06    0.05
  -4 -11  -2    0.18    0.05
   4  11   2    0.25    0.05
   4  11   2    0.26    0.05
  -4  11  -2    0.19    0.04
  -4  11  -2    0.21    0.05
  -4  11  -2    0.25    0.05
   5 -11   2    4.80    0.15
  -5 -11  -2    4.84    0.16
   5  11   2    4.80    0.16
  -5  11  -2    4.87    0.16
  -5  11  -2    5.05    0.16
   5  11   2    5.15    0.15
   6 -11   2    1.32    0.07
  -6 -11  -2    1.47    0.08
   6  11   2    1.38    0.08
  -6  11  -2    1.45    0.09
  -6  11  -2    1.36    0.08
   6  11   2    1.32    0.09
  -7 -11  -2    2.95    0.12
   7 -11   2    3.04    0.11
  -7  11  -2    2.94    0.12
   7  11   2    2.68    0.12
   7  11   2    2.95    0.11
  -7  11  -2    2.97    0.12
   8 -11   2    0.01    0.04
  -8 -11  -2    0.01    0.04
  -8  11  -2    0.00    0.05
   8  11   2   -0.09    0.04
   8  11   2   -0.02    0.04
  -8  11  -2    0.02    0.04
   9 -11   2    0.15    0.04
  -9 -11  -2    0.18    0.05
  -9  11  -2    0.22    0.05
   9  11   2    0.23    0.05
   9  11   2    0.27    0.05
  -9  11  -2    0.19    0.05
 -10 -11  -2    0.20    0.05
  10 -11   2    0.17    0.04
  10  11   2    0.23    0.05
  10  11   2    0.17    0.05
 -10  11  -2    0.22    0.05
 -10  11  -2    0.28    0.06
 -11 -11  -2    2.57    0.11
  11 -11   2    2.53    0.10
  11  11   2    2.67    0.11
  11  11   2    2.45    0.11
 -11  11  -2    2.59    0.11
 -11  11  -2    2.73    0.12
 -12 -11  -2    0.06    0.05
  12 -11   2    0.07    0.04
  12  11   2    0.07    0.05
 -12  11  -2    0.10    0.05
  12  11   2    0.08    0.05
  13 -11   2    1.11    0.07
 -13 -11  -2    0.91    0.07
  13  11   2    0.97    0.08
 -13  11  -2    1.14    0.09
  13  11   2    0.94    0.08
  14 -11   2    0.31    0.05
 -14 -11  -2    0.32    0.06
  14  11   2    0.24    0.06
 -14  11  -2    0.35    0.07
  14  11   2    0.30    0.06
 -15 -11  -2    0.70    0.07
  15 -11   2    0.59    0.06
  15  11   2    0.71    0.07
 -15  11  -2    0.70    0.08
  15  11   2    0.63    0.07
 -16 -11  -2    1.10    0.09
  16 -11   2    1.28    0.08
  16  11   2    1.33    0.10
 -16  11  -2    1.22    0.09
  16  11   2    1.27    0.09
 -17 -11  -2   -0.04    0.05
  17 -11   2   -0.01    0.05
 -17  11  -2    0.02    0.06
  17  11   2    0.03    0.06
  17  11   2   -0.05    0.05
  18 -11   2    0.02    0.05
 -18 -11  -2    0.01    0.06
  18  11   2    0.02    0.06
  18  11   2    0.04    0.05
 -18  11  -2    0.10    0.06
 -19 -11  -2    1.54    0.10
  19 -11   2    1.24    0.08
  19  11   2    1.40    0.10
 -19  11  -2    1.24    0.10
  19  11   2    1.47    0.10
  20 -11   2    0.31    0.06
 -20 -11  -2    0.35    0.07
 -20  11  -2    0.38    0.07
  20  11   2    0.38    0.07
  20  11   2    0.35    0.06
 -21 -11  -2   -0.08    0.06
  21 -11   2   -0.01    0.05
  21  11   2    0.02    0.06
 -21  11  -2    0.07    0.07
  21  11   2    0.00    0.05
 -22 -11  -2    0.25    0.07
  22 -11   2    0.39    0.07
  22  11   2    0.32    0.07
  22  11   2    0.30    0.07
  23 -11   2    0.11    0.06
  23  11   2    0.17    0.06
  23  11   2    0.10    0.07
  24  11   2   -0.10    0.06
 -23 -12   2    1.14    0.10
  23  12  -2    1.20    0.09
 -22 -12   2    4.09    0.17
  22  12  -2    4.20    0.17
 -21 -12   2    2.49    0.12
  21 -12  -2    2.51    0.13
  21  12  -2    2.50    0.13
 -20 -12   2   -0.02    0.06
 -20  12   2    0.05    0.06
  20  12  -2   -0.07    0.06
  20  12  -2    0.11    0.06
 -19 -12   2   -0.01    0.06
  19  12  -2    0.09    0.07
  19  12  -2    0.10    0.06
 -19  12   2    0.11    0.06
 -18 -12   2   17.58    0.46
  18  12  -2   17.15    0.46
  18  12  -2   17.49    0.46
 -18  12   2   18.03    0.47
 -17 -12   2    0.55    0.07
  17  12  -2    0.48    0.07
  17  12  -2    0.48    0.08
 -17  12   2    0.40    0.07
 -16 -12   2   18.65    0.48
  16  12  -2   18.95    0.49
  16  12  -2   18.09    0.48
 -16  12   2   18.89    0.49
 -15 -12   2   11.98    0.33
  15  12  -2   12.66    0.34
 -15  12   2   12.36    0.34
  15  12  -2   12.03    0.34
 -14 -12   2    2.08    0.10
  14  12  -2    2.27    0.11
  14  12  -2    2.06    0.11
 -14  12   2    2.23    0.11
 -13 -12   2    2.22    0.11
  13  12  -2    2.36    0.11
 -13  12   2    2.39    0.12
  13  12  -2    2.17    0.12
 -12 -12   2    3.23    0.13
 -12  12   2    3.27    0.13
  12  12  -2    3.23    0.13
  12  12  -2    3.37    0.13
 -11 -12   2    3.44    0.13
  11  12  -2    3.63    0.14
  11  12  -2    3.34    0.14
 -11  12   2    3.51    0.14
 -10 -12   2    0.83    0.07
  10  12  -2    0.92    0.08
  10  12  -2    1.05    0.08
 -10  12   2    1.08    0.08
  -9 -12   2    0.28    0.05
   9  12  -2    0.15    0.05
   9  12  -2    0.18    0.05
  -9  12   2    0.18    0.05
  -8 -12   2    0.93    0.07
   8  12  -2    0.99    0.08
   8  12  -2    0.94    0.08
  -8  12   2    1.07    0.08
   7 -12  -2    9.21    0.26
  -7 -12   2    9.63    0.26
   7  12  -2    9.78    0.26
  -7  12   2    9.55    0.27
   7  12  -2    9.57    0.27
   6 -12  -2    3.33    0.12
  -6 -12   2    3.38    0.12
   6  12  -2    3.14    0.12
  -6  12   2    3.20    0.13
   6  12  -2    3.28    0.13
  -6  12   2    3.26    0.12
   5 -12  -2    0.23    0.05
  -5 -12   2    0.24    0.05
   5  12  -2    0.20    0.05
  -5  12   2    0.13    0.05
   5  12  -2    0.22    0.05
  -5  12   2    0.18    0.05
  -4 -12   2    0.55    0.06
   4 -12  -2    0.54    0.06
  -4  12   2    0.58    0.06
  -4  12   2    0.65    0.06
   4  12  -2    0.55    0.07
   4  12  -2    0.60    0.06
  -3 -12   2   -0.06    0.04
   3 -12  -2    0.04    0.04
   3  12  -2    0.03    0.05
   3  12  -2    0.00    0.04
  -3  12   2   -0.02    0.05
   2 -12  -2   12.58    0.35
  -2 -12   2   13.10    0.34
  -2  12   2   13.26    0.34
   2  12  -2   12.83    0.34
   2  12  -2   13.36    0.34
   1 -12  -2    2.06    0.10
  -1 -12   2    2.02    0.10
  -1  12   2    2.38    0.10
   1  12  -2    2.22    0.10
   1  12  -2    2.15    0.10
   0 -12  -2   23.55    0.60
   0 -12   2   23.85    0.59
   0  12  -2   24.30    0.58
   0  12   2   23.73    0.59
   0  12  -2   23.92    0.59
   1 -12   2    0.50    0.06
  -1 -12  -2    0.47    0.06
  -1  12  -2    0.61    0.06
   1  12   2    0.61    0.06
   2 -12   2    1.06    0.07
  -2 -12  -2    1.09    0.08
  -2  12  -2    1.13    0.08
   2  12   2    1.28    0.09
  -2  12  -2    1.39    0.08
  -3 -12  -2    1.24    0.08
   3  12   2    1.23    0.08
  -3  12  -2    1.42    0.09
  -3  12  -2    1.35    0.08
  -4 -12  -2   13.52    0.36
   4 -12   2   13.46    0.35
  -4  12  -2   14.07    0.36
  -4  12  -2   13.73    0.35
   4  12   2   13.34    0.36
  -4  12  -2   13.59    0.36
   5 -12   2    2.29    0.10
  -5 -12  -2    2.34    0.11
  -5  12  -2    2.65    0.11
   5  12   2    2.32    0.11
   6 -12   2   19.60    0.48
  -6 -12  -2   18.98    0.49
   6  12   2   19.28    0.49
  -6  12  -2   19.22    0.49
   6  12   2   19.72    0.48
   7 -12   2    0.48    0.06
  -7 -12  -2    0.44    0.06
   7  12   2    0.50    0.06
  -7  12  -2    0.46    0.06
   7  12   2    0.49    0.06
  -8 -12  -2    0.02    0.05
   8 -12   2    0.04    0.04
   8  12   2   -0.06    0.04
  -8  12  -2   -0.05    0.05
   8  12   2   -0.07    0.05
   9 -12   2    2.02    0.09
  -9 -12  -2    2.02    0.10
   9  12   2    2.16    0.10
  -9  12  -2    2.03    0.11
   9  12   2    1.90    0.11
 -10 -12  -2    0.58    0.06
  10 -12   2    0.69    0.06
  10  12   2    0.57    0.06
 -10  12  -2    0.52    0.07
  10  12   2    0.49    0.07
  11 -12   2    0.43    0.06
 -11 -12  -2    0.32    0.05
  11  12   2    0.43    0.06
  11  12   2    0.44    0.06
 -11  12  -2    0.44    0.07
 -12 -12  -2    0.28    0.06
  12 -12   2    0.38    0.06
 -12  12  -2    0.32    0.07
  12  12   2    0.41    0.06
  12  12   2    0.37    0.07
  13 -12   2    4.12    0.14
 -13 -12  -2    4.13    0.15
  13  12   2    4.09    0.16
 -13  12  -2    3.96    0.16
  13  12   2    4.25    0.15
  14 -12   2   10.22    0.27
 -14 -12  -2    9.80    0.29
  14  12   2   10.11    0.29
 -14  12  -2   10.22    0.30
  14  12   2   10.17    0.28
  15 -12   2    0.88    0.08
 -15 -12  -2    0.92    0.08
  15  12   2    0.95    0.09
 -15  12  -2    0.82    0.08
  15  12   2    0.82    0.08
  16 -12   2    2.08    0.10
 -16 -12  -2    2.19    0.11
  16  12   2    2.05    0.11
 -16  12  -2    2.00    0.12
  17 -12   2    0.63    0.07
 -17 -12  -2    0.60    0.07
 -17  12  -2    0.70    0.09
  17  12   2    0.61    0.08
 -18 -12  -2    2.66    0.13
  18 -12   2    2.77    0.12
  18  12   2    2.78    0.14
 -18  12  -2    2.79    0.14
  19 -12   2    1.19    0.09
 -19 -12  -2    1.15    0.10
  19  12   2    1.50    0.11
 -19  12  -2    1.24    0.11
  20 -12   2    9.01    0.26
 -20 -12  -2    8.90    0.27
  20  12   2    8.69    0.27
  21 -12   2    0.06    0.06
  21  12   2    0.10    0.07
  22 -12   2    0.97    0.09
 -21 -13   2    0.03    0.07
  21  13  -2    0.00    0.06
 -20 -13   2    0.18    0.07
  20  13  -2    0.42    0.07
 -19 -13   2    1.77    0.11
  19 -13  -2    2.10    0.12
  19  13  -2    1.79    0.12
 -18 -13   2    0.12    0.06
  18 -13  -2    0.01    0.06
  18  13  -2    0.05    0.06
  18  13  -2    0.24    0.06
 -17 -13   2    3.10    0.13
  17 -13  -2    2.93    0.14
  17  13  -2    3.25    0.14
  17  13  -2    2.90    0.14
 -16 -13   2    1.27    0.09
  16 -13  -2    1.34    0.11
  16  13  -2    1.27    0.09
  16  13  -2    1.23    0.10
  15 -13  -2    0.61    0.08
 -15 -13   2    0.67    0.07
  15  13  -2    0.81    0.09
  15  13  -2    0.65    0.08
 -14 -13   2    0.74    0.07
  14 -13  -2    0.68    0.08
 -14  13   2    0.70    0.08
  14  13  -2    0.76    0.08
  14  13  -2    0.78    0.08
 -13 -13   2    9.03    0.27
  13 -13  -2    9.24    0.28
  13  13  -2    9.66    0.27
  13  13  -2    9.15    0.28
 -13  13   2    9.50    0.28
 -12 -13   2    1.31    0.09
  12 -13  -2    1.36    0.09
  12  13  -2    1.30    0.10
 -12  13   2    1.34    0.10
  12  13  -2    1.35    0.10
 -11 -13   2    0.03    0.05
  11 -13  -2    0.15    0.06
 -11  13   2   -0.04    0.05
  11  13  -2    0.00    0.06
  11  13  -2    0.02    0.05
  10 -13  -2    4.99    0.17
 -10 -13   2    5.32    0.17
 -10  13   2    5.23    0.18
  10  13  -2    5.62    0.18
  10  13  -2    5.24    0.18
   9 -13  -2    0.00    0.05
  -9 -13   2   -0.02    0.04
   9  13  -2   -0.04    0.05
   9  13  -2    0.01    0.05
  -9  13   2    0.01    0.05
   8 -13  -2    0.69    0.07
  -8 -13   2    0.83    0.08
  -8  13   2    0.72    0.07
   8  13  -2    0.80    0.07
   8  13  -2    0.73    0.08
  -7 -13   2    2.61    0.11
   7 -13  -2    2.22    0.11
   7  13  -2    2.35    0.11
   7  13  -2    2.29    0.12
  -7  13   2    2.26    0.11
   6 -13  -2    5.00    0.17
  -6 -13   2    5.05    0.17
   6  13  -2    5.15    0.17
  -6  13   2    5.04    0.17
   6  13  -2    5.10    0.17
   5 -13  -2    0.56    0.06
  -5 -13   2    0.64    0.06
   5  13  -2    0.48    0.06
  -5  13   2    0.52    0.06
   5  13  -2    0.46    0.07
  -5  13   2    0.58    0.06
  -4 -13   2    1.44    0.08
   4  13  -2    1.36    0.09
  -4  13   2    1.46    0.09
   4  13  -2    1.48    0.09
   3 -13  -2    0.59    0.06
   3  13  -2    0.49    0.06
  -3  13   2    0.54    0.06
   3  13  -2    0.37    0.06
   2 -13  -2    0.05    0.05
   2  13  -2   -0.06    0.05
  -2  13   2   -0.02    0.05
   2  13  -2    0.02    0.05
   1 -13  -2    2.07    0.10
   1  13  -2    2.02    0.10
  -1  13   2    2.12    0.10
   0 -13  -2    0.53    0.06
   0  13  -2    0.43    0.06
   0  13   2    0.39    0.06
  -1 -13  -2    0.00    0.05
  -1  13  -2    0.05    0.05
   1  13   2    0.09    0.05
   2 -13   2    0.22    0.05
  -2 -13  -2    0.14    0.06
   2  13   2    0.29    0.06
  -2  13  -2    0.43    0.06
   3 -13   2   -0.10    0.04
  -3 -13  -2   -0.10    0.04
   3  13   2   -0.01    0.05
  -3  13  -2    0.06    0.05
  -4 -13  -2   -0.09    0.05
  -4  13  -2    0.08    0.05
   4  13   2   -0.08    0.05
  -5 -13  -2    0.14    0.05
   5 -13   2    0.14    0.05
  -5  13  -2    0.13    0.05
   5  13   2    0.16    0.06
  -6 -13  -2    0.69    0.07
   6 -13   2    0.81    0.07
   6  13   2    0.64    0.07
  -6  13  -2    0.77    0.08
  -7 -13  -2    6.48    0.20
   7 -13   2    6.50    0.19
  -7  13  -2    6.21    0.20
   7  13   2    5.79    0.20
   8 -13   2    0.12    0.05
  -8 -13  -2    0.16    0.06
  -8  13  -2    0.13    0.06
   8  13   2    0.06    0.06
  -9 -13  -2    2.65    0.12
   9 -13   2    2.79    0.11
  -9  13  -2    2.95    0.13
   9  13   2    2.84    0.13
  10 -13   2    0.01    0.05
 -10 -13  -2   -0.02    0.05
 -10  13  -2    0.02    0.05
  10  13   2    0.04    0.06
 -11 -13  -2   -0.04    0.05
  11 -13   2    0.08    0.05
  11  13   2    0.04    0.06
 -11  13  -2    0.04    0.05
  12 -13   2    0.94    0.08
 -12 -13  -2    0.92    0.08
 -12  13  -2    0.91    0.09
  12  13   2    0.99    0.09
  13 -13   2    6.32    0.19
 -13 -13  -2    6.27    0.20
  13  13   2    5.91    0.21
 -13  13  -2    6.37    0.22
  14 -13   2    0.12    0.05
 -14 -13  -2    0.06    0.05
  14  13   2    0.10    0.06
 -14  13  -2    0.10    0.06
  15 -13   2    3.43    0.13
 -15 -13  -2    3.44    0.15
 -15  13  -2    3.61    0.16
  15  13   2    3.33    0.15
 -16 -13  -2    0.18    0.07
  16  13   2    0.08    0.07
 -16  13  -2    0.10    0.06
 -17 -13  -2    1.92    0.11
  17  13   2    1.82    0.12
 -17  13  -2    1.70    0.12
 -18 -13  -2    0.25    0.07
  16 -14  -2    0.32    0.08
  16  14  -2    0.27    0.07
  15 -14  -2    2.18    0.13
  15  14  -2    2.29    0.12
  14 -14  -2    8.58    0.27
  14  14  -2    8.60    0.26
  14  14  -2    8.38    0.26
  13 -14  -2    0.31    0.07
  13  14  -2    0.42    0.07
  13  14  -2    0.41    0.07
  12 -14  -2    4.48    0.17
  12  14  -2    4.71    0.17
  12  14  -2    4.55    0.17
  11 -14  -2    1.70    0.11
  11  14  -2    1.67    0.11
  11  14  -2    1.62    0.10
  10 -14  -2    1.67    0.10
  10  14  -2    1.47    0.11
  10  14  -2    1.50    0.10
   9 -14  -2    0.54    0.07
   9  14  -2    0.60    0.08
   9  14  -2    0.60    0.07
   8 -14  -2    0.00    0.05
  -8  14   2    0.03    0.06
   8  14  -2    0.06    0.05
   8  14  -2    0.02    0.06
   7  14  -2    0.37    0.07
  -7  14   2    0.37    0.07
   7  14  -2    0.49    0.07
   6  14  -2    6.67    0.21
   6  14  -2    6.55    0.21
  -6  14   2    6.63    0.21
   5  14  -2    5.93    0.19
   5  14  -2    5.64    0.19
   4 -14  -2    3.45    0.14
   4  14  -2    3.32    0.14
   3 -14  -2    0.09    0.05
   3  14  -2    0.09    0.05
  -3  14   2    0.16    0.06
   2 -14  -2    2.06    0.11
  -2  14   2    2.11    0.11
   1 -14  -2    0.12    0.05
   1  14  -2    0.09    0.05
  -1  14   2    0.00    0.05
   0 -14   2   -0.02    0.05
   0 -14  -2    0.05    0.05
   0  14   2    0.00    0.05
   1 -14   2    3.99    0.15
  -1 -14  -2    4.22    0.16
   1  14   2    4.23    0.16
  -2 -14  -2    3.13    0.13
   2 -14   2    3.16    0.13
   2  14   2    3.18    0.14
  -3 -14  -2    0.71    0.07
   3  14   2    0.75    0.08
  -4 -14  -2    1.46    0.09
   4  14   2    1.54    0.10
  -5 -14  -2    0.50    0.06
   5  14   2    0.54    0.07
  -6 -14  -2    1.00    0.09
   6  14   2    1.10    0.10
  -7 -14  -2    1.78    0.10
   7  14   2    1.68    0.11
  -7  14  -2    1.93    0.11
  -8 -14  -2    4.13    0.16
   8  14   2    4.20    0.17
  -8  14  -2    4.48    0.17
  -9 -14  -2   -0.04    0.05
  -9  14  -2    0.02    0.06
   9  14   2    0.02    0.06
 -10 -14  -2    2.78    0.13
 -10  14  -2    2.71    0.13
  10  14   2    2.61    0.13
 -11 -14  -2   -0.03    0.05
 -11  14  -2    0.07    0.06
  11  14   2   -0.03    0.06
 -12 -14  -2   -0.03    0.06
 -12  14  -2    0.07    0.06
  12  14   2   -0.01    0.06
 -13 -14  -2    1.11    0.10
 -13  14  -2    1.22    0.10
  13  14   2    0.98    0.09
 -14 -14  -2    0.56    0.08
 -14  14  -2    0.45    0.08
  14  14   2    0.48    0.08
 -15 -14  -2    0.02    0.06
 -15  14  -2    0.03    0.07
 -16 -14  -2    7.81    0.25
  14 -15  -2    1.62    0.11
  13 -15  -2    0.32    0.07
  12 -15  -2    0.44    0.07
  11 -15  -2    0.06    0.06
  10 -15  -2    0.69    0.08
  -3 -15   2    0.09    0.06
  -2 -15   2    0.22    0.06
  -2  15   2    0.25    0.07
  -1 -15   2    0.74    0.08
  -1  15   2    0.87    0.08
   0 -15   2    1.25    0.09
   0  15   2    1.21    0.10
  -1 -15  -2    0.37    0.07
   1 -15   2    0.47    0.07
   1  15   2    0.42    0.07
  -2 -15  -2   -0.13    0.05
   2  15   2   -0.01    0.06
  -3 -15  -2   -0.11    0.05
   3  15   2    0.06    0.06
  -4 -15  -2    0.06    0.05
   4  15   2    0.07    0.06
  -5 -15  -2    0.50    0.07
   5  15   2    0.45    0.08
  -6 -15  -2    2.52    0.12
   6  15   2    2.32    0.13
  -7 -15  -2    0.37    0.07
   7  15   2    0.39    0.08
  -8 -15  -2   -0.06    0.05
   8  15   2    0.04    0.06
  -9 -15  -2    0.88    0.08
   9  15   2    0.71    0.08
 -10 -15  -2   -0.08    0.06
 -10  15  -2   -0.07    0.05
 -11 -15  -2    0.16    0.06
 -11  15  -2    0.17    0.07
 -12 -15  -2    0.67    0.08
 -12  15  -2    0.72    0.09
 -13 -15  -2    1.08    0.10
  -6 -16   2    1.24    0.10
  -5 -16   2   -0.12    0.06
  -4 -16   2   -0.08    0.06
  -3 -16   2    4.86    0.18
  -2 -16   2   -0.05    0.06
  -1 -16   2    0.12    0.06
  -1  16   2    0.10    0.07
   0  16   2    0.78    0.09
   1  16   2    0.21    0.07
   2  16   2    0.03    0.07
   3  16   2    2.64    0.13
   4  16   2    0.29    0.08
  32   0  -3    0.01    0.05
 -32   0   3    0.01    0.06
 -31   0   3    0.05    0.06
  31   0  -3    0.01    0.05
 -30   0   3    0.04    0.05
  30   0  -3    0.07    0.05
  29   0  -3    0.30    0.06
 -29   0   3    0.31    0.06
  28   0  -3   -0.01    0.04
 -28   0   3    0.09    0.05
  27   0  -3    2.81    0.12
 -27   0   3    2.91    0.12
 -26   0   3    0.05    0.05
  26   0  -3    0.01    0.04
  25   0  -3    0.94    0.07
 -25   0   3    1.06    0.08
 -24   0   3    0.08    0.04
  24   0  -3    0.02    0.04
  23   0  -3    2.11    0.09
 -23   0   3    2.37    0.10
  22   0  -3    0.00    0.04
 -22   0   3    0.00    0.04
  22   0  -3    0.05    0.03
  21   0  -3    7.61    0.20
 -21   0   3    7.18    0.21
  21   0  -3    7.47    0.20
  20   0  -3    0.08    0.03
  20   0  -3   -0.01    0.03
 -20   0   3    0.04    0.04
  19   0  -3   10.02    0.25
 -19   0   3    9.51    0.26
 -18   0   3    0.01    0.03
  18   0  -3    0.02    0.03
 -17   0   3    0.03    0.02
  17   0  -3    0.00    0.03
 -17   0   3    0.03    0.03
  16   0  -3    0.01    0.02
 -16   0   3    0.03    0.03
 -16   0   3   -0.03    0.02
 -15   0   3    8.59    0.21
  15   0  -3    9.30    0.22
 -15   0   3    8.39    0.23
 -15   0   3    9.02    0.22
 -14   0   3    0.00    0.03
 -14   0   3   -0.03    0.02
 -14   0   3   -0.03    0.01
  14   0  -3   -0.01    0.02
 -13   0   3    0.65    0.04
  13   0  -3    0.62    0.04
 -13   0   3    0.62    0.03
 -12   0   3   -0.01    0.01
  12   0  -3    0.00    0.02
 -12   0   3   -0.02    0.02
 -11   0   3    1.37    0.04
  11   0  -3    1.33    0.05
 -11   0   3    1.48    0.06
 -10   0   3    0.00    0.02
  10   0  -3   -0.07    0.02
  10   0  -3   -0.02    0.02
 -10   0   3   -0.02    0.01
   9   0  -3   21.14    0.47
  -9   0   3   19.65    0.49
  -9   0   3   20.38    0.47
   9   0  -3   21.22    0.48
   8   0  -3   -0.09    0.02
  -8   0   3   -0.07    0.02
  -8   0   3   -0.07    0.01
   8   0  -3   -0.09    0.02
   7   0  -3    2.92    0.08
  -7   0   3    2.99    0.09
   7   0  -3    2.85    0.08
  -7   0   3    2.81    0.08
   6   0  -3   -0.05    0.01
   6   0  -3   -0.06    0.01
  -6   0   3   -0.06    0.01
  -6   0   3   -0.05    0.01
   5   0  -3    0.15    0.02
   5   0  -3    0.11    0.01
  -5   0   3    0.14    0.02
  -5   0   3    0.14    0.01
  -4   0   3   -0.38    0.01
   4   0  -3   -0.39    0.01
  -4   0   3   -0.38    0.01
   4   0  -3   -0.38    0.01
  -3   0   3   -0.16    0.02
   3   0  -3   -0.12    0.02
  -3   0   3   -0.17    0.02
   3   0  -3   -0.16    0.03
  -2   0   3   -0.10    0.01
  -2   0   3   -0.11    0.01
   2   0  -3   -0.11    0.01
   2   0  -3   -0.11    0.01
  -1   0   3    0.57    0.02
   1   0  -3    0.53    0.02
  -1   0   3    0.53    0.02
   1   0  -3    0.54    0.02
   0   0   3   -0.61    0.01
   0   0   3   -0.61    0.01
   0   0  -3   -0.62    0.01
   0   0  -3   -0.62    0.01
   1   0   3    0.73    0.03
  -1   0  -3    0.66    0.04
  -1   0  -3    0.56    0.04
   1   0   3    0.72    0.03
  -2   0  -3    0.02    0.01
   2   0   3    0.01    0.01
   2   0   3    0.01    0.01
  -2   0  -3    0.01    0.01
  -3   0  -3    0.14    0.02
   3   0   3    0.13    0.02
   3   0   3    0.14    0.01
  -3   0  -3    0.14    0.02
   4   0   3    0.01    0.01
  -4   0  -3    0.01    0.01
  -4   0  -3   -0.02    0.02
   4   0   3   -0.02    0.01
  -5   0  -3    1.73    0.06
  -5   0  -3    1.69    0.06
   5   0   3    1.81    0.05
   5   0   3    1.77    0.06
   6   0   3   -0.01    0.02
  -6   0  -3    0.02    0.02
  -6   0  -3   -0.01    0.02
   6   0   3    0.00    0.01
   7   0   3    4.54    0.12
  -7   0  -3    4.31    0.12
  -7   0  -3    4.37    0.12
   7   0   3    4.72    0.11
  -8   0  -3   -0.01    0.02
   8   0   3    0.01    0.02
   8   0   3    0.00    0.01
  -8   0  -3    0.01    0.02
  -9   0  -3    4.94    0.13
  -9   0  -3    5.07    0.14
   9   0   3    4.94    0.13
   9   0   3    5.00    0.12
 -10   0  -3    0.01    0.02
  10   0   3    0.00    0.02
  10   0   3    0.00    0.02
 -10   0  -3    0.01    0.02
 -11   0  -3    0.06    0.03
 -11   0  -3    0.01    0.02
  11   0   3    0.06    0.02
  11   0   3    0.09    0.02
 -12   0  -3    0.03    0.02
  12   0   3   -0.01    0.02
 -12   0  -3   -0.03    0.02
  12   0   3    0.00    0.02
 -13   0  -3    0.78    0.05
  13   0   3    0.88    0.04
 -13   0  -3    0.88    0.05
  13   0   3    0.89    0.05
 -14   0  -3    0.03    0.03
 -14   0  -3    0.03    0.02
  14   0   3    0.02    0.02
  14   0   3   -0.02    0.02
 -15   0  -3    0.34    0.04
  15   0   3    0.42    0.03
 -15   0  -3    0.36    0.04
  15   0   3    0.34    0.04
 -16   0  -3    0.05    0.03
  16   0   3   -0.04    0.03
 -16   0  -3   -0.01    0.03
  17   0   3    5.99    0.16
 -17   0  -3    5.80    0.16
 -17   0  -3    5.46    0.16
 -18   0  -3    0.05    0.04
  18   0   3    0.09    0.03
 -18   0  -3   -0.03    0.03
  19   0   3    0.59    0.05
 -19   0  -3    0.54    0.05
 -19   0  -3    0.58    0.06
  20   0   3    0.03    0.04
 -20   0  -3    0.03    0.03
 -20   0  -3   -0.04    0.04
 -21   0  -3    0.00    0.04
  21   0   3    0.02    0.04
  22   0   3    0.03    0.04
 -22   0  -3    0.02    0.04
 -23   0  -3    3.64    0.13
  23   0   3    3.57    0.13
 -24   0  -3    0.06    0.05
  24   0   3    0.07    0.05
 -25   0  -3    2.88    0.12
  25   0   3    2.96    0.12
  26   0   3    0.00    0.05
 -26   0  -3   -0.02    0.05
  27   0   3    1.81    0.10
 -27   0  -3    1.85    0.10
 -28   0  -3    0.04    0.05
  28   0   3    0.03    0.05
 -29   0  -3    2.88    0.13
  29   0   3    3.23    0.13
 -30   0  -3    0.02    0.06
  30   0   3   -0.01    0.05
  32  -1  -3    0.30    0.06
 -32  -1   3    0.23    0.06
 -32   1   3    0.21    0.06
  32   1  -3    0.16    0.06
  31  -1  -3    1.41    0.09
 -31  -1   3    1.45    0.10
 -31   1   3    1.27    0.10
  31   1  -3    1.32    0.09
  30  -1  -3    0.19    0.06
 -30  -1   3    0.15    0.06
 -30   1   3    0.26    0.06
  30   1  -3    0.23    0.06
  29  -1  -3    0.45    0.06
 -29  -1   3    0.40    0.06
  29   1  -3    0.34    0.06
 -29   1   3    0.41    0.06
  28  -1  -3    0.17    0.05
 -28  -1   3    0.28    0.05
  28   1  -3    0.28    0.05
 -28   1   3    0.22    0.05
  27  -1  -3    1.31    0.08
 -27  -1   3    1.26    0.08
  27   1  -3    1.41    0.09
 -27   1   3    1.22    0.08
 -26  -1   3    0.05    0.04
  26  -1  -3    0.06    0.04
 -26   1   3    0.08    0.05
  26   1  -3    0.04    0.04
 -25  -1   3   11.04    0.31
  25  -1  -3   11.29    0.29
  25   1  -3   11.23    0.29
 -25   1   3   10.71    0.30
  24  -1  -3    6.55    0.19
  24  -1  -3    6.35    0.18
 -24  -1   3    6.56    0.20
  24   1  -3    6.20    0.18
 -24   1   3    6.34    0.20
  23  -1  -3    3.77    0.13
  23  -1  -3    3.69    0.12
 -23  -1   3    3.56    0.13
  23   1  -3    3.60    0.12
 -23   1   3    3.79    0.13
 -22  -1   3    0.22    0.04
  22  -1  -3    0.24    0.04
  22   1  -3    0.20    0.04
 -22   1   3    0.24    0.05
  21  -1  -3   21.34    0.51
 -21  -1   3   21.11    0.53
 -21   1   3   21.21    0.53
  21   1  -3   21.72    0.51
 -20  -1   3    0.98    0.07
  20  -1  -3    0.84    0.06
 -20   1   3    0.80    0.06
  20   1  -3    0.79    0.05
 -20   1   3    0.78    0.06
[truncated: 2,595,445 more chars]
